# Supplementary material
Source: ML conference proceedings conference paper supplement (https://openreview.net/forum?id=xg0fmtqh8d)
Supplement: supplementary_material [file 3_五问乘用车油耗限值:燃油车要被淘汰了吗]

## Sheet: Sheet
代码	简称	投资评级	收盘价（元）	总市值（亿元）	EPS（元）		PE（倍）
					2024E	2025E	2024E	2025E
002594.SZ	比亚迪	未评级	251.60	6927.28	12.83	16.30	19.60	15.43
0175.HK	吉利汽车	未评级	8.92	898.20	1.12	1.10	8.00	8.09
002126.SZ	银轮股份	未评级	16.42	135.90	1.03	1.36	16.00	12.12
000581.SZ	威孚高科	增持	16.09	150.84	2.04	2.29	7.87	7.04
603013.SH	亚普股份	增持	13.10	67.15	1.06	1.20	12.38	10.96
601965.SH	中国汽研	买入	16.32	163.74	0.95	1.11	17.11	14.70
