# Supplementary material
Source: ML conference proceedings conference paper supplement (https://openreview.net/forum?id=xg0fmtqh8d)
Supplement: supplementary_material [file 4_计算机行业研究:北京市规划算力基础设施建设,关注国产算力链投资机会.xlsx]

## Sheet: Sheet
股票代码	公司名称	建议关注理由
寒武纪	688256.SH	寒武纪系国内AI芯片重要标的。公司产品线涵盖云端、边缘端和IP授权及软件四大板块，各产线产品持续高端化迭代。云端智能芯片为业务核心，同时延伸发展训练整机与智能计算集群。公司2023年业绩快报对应EPS约为-2.03元，对应-86XPE。预计24年摊薄EPS为-1.39元，对应-116XPE。
海光信息	688041.SH	海光信息系国内稀缺的CPU+DCU涉及厂商。公司CPU产品性能领先，DCU产品迭代顺利，对半精度/单精度能力进行针对性加强。公司2023年报对应EPS约为0.54元，对应142XPE。预计24年摊薄EPS为0.74元，对应106XPE。
龙芯中科	688047.SH	龙芯中科系国产CPU重要厂商。主营业务包括处理器及配套芯片的研制、销售及服务，公司研制的芯片包括龙芯1号、龙芯2号、龙芯3号三大系列处理器芯片及桥片等配套芯片。公司2023年报对应EPS约为-0.82元，对应-106XPE。预计24年摊薄EPS为0.22元，对应377XPE。
景嘉微	300474.SZ	景嘉微系国产GPU图显重要标的。公司立足并成长于军用图形显控和小型化雷达领域，加强在民用高性能GPU芯片等消费领域的产品开发及推广，从“0”到“1”打造了三代图形显控产品（JM5系列、7系列、9系列）。预计23、24年摊薄EPS分别为0.15、0.54元，对应483X、129XPE。
深桑达	000032.SZ	深桑达系中国电子数据创新业务的核心参与企业。公司已形成数据治理工程总体设计、数据金库、数据要素加工交易平台、安全可信数据空间、数据要素蝶变器、数据资产登记服务平台等数据安全与数据要素化工程系列产品。预计23、24年摊薄EPS分别为0.29、0.35元，对应73X、47XPE。
优刻得	688158.SH	优刻得系国内中立云计算服务领域的领先企业。公司主要通过公有云、私有云、混合云三种模式，为客户提供计算、网络、存储等IaaS和PaaS产品，另涉及大数据和人工智能产品的开发和服务。公司2023年报对应EPS约为-0.76元，对应-18XPE。预计24年摊薄EPS为-0.37元，对应-31XPE。
浪潮信息	000977.SZ	浪潮信息系算力系统供应商。公司支持多元异构算力，可适配多种架构的AI加速芯片。公司致力于积极推进更加多元化的算力系统研发创新，为客户提供持续稳定的产品服务。预计23、24年摊薄EPS分别为1.21、1.56元，对应27X、24XPE。
神州数码	000034.SZ	神州数码系国内IT分销重要标的。公司主营业务包括IT分销及增值服务业务、云计算和数字化转型业务和信创业务，公司IT分销及增值服务业务可根据最终销售客户和产品进一步划分为消费电子业务和企业增值业务。预计24、25年摊薄EPS分别为1.75、2.14元，对应17X、14XPE。
中科曙光	603019.SH	中科曙光系国产算力领军者。公司积极建设“全国一体化算力服务平台”，致力于链接遍布各地各类算力中心，为千行百业提供“先进、绿色、无损算力”和“集算力、数据、应用、运营、运维为一体的服务”。预计23、24年摊薄EPS分别为1.26、1.60元，对应38X、29XPE。
同方股份	600100.SH	同方股份系国内高科技企业领先者。公司主要从事核技术应用、数字信息、智慧能源等业务，其中，数字信息业务主要包括了计算机产品、知识内容与服务领域、大数据产业等领域。
中国长城	000066.SZ	中国长城系中国电子自主计算产业的主力军。公司聚焦计算产业与系统装备两大主业，形成了8项业务10家骨干企业聚力发展的新格局。预计23、24年摊薄EPS分别为0.03、0.11元，对应280X、84XPE。
拓维信息	002261.SZ	拓维信息自主品牌“兆瀚”创新发布了兆瀚SA200IA2智能边缘小站、兆瀚RA2311-C推理服务器、兆瀚RA5900-B训练服务器等3款昇腾AI产品。预计23、24年摊薄EPS分别为0.12、0.24元，对应419X、57XPE。
宝信软件	600845.SH	宝信软件系国内IDC重要标的。公司多年专注于自主研发工业互联网平台宝联登xIn³Plat和AI中台、xAI套件等，并积极推进钢铁AI大模型研发，为智能制造发展奠定基石。预计24、25年摊薄EPS分别为1.06、1.31元，对应46X、31XPE。
万国数据	9698.HK	万国数据系国内第三方IDC运营商市场的领头羊。公司核心业务为托管服务，并有托管管理服务和云管理两项增值服务。预计23、24年摊薄EPS分别为-2.85、-0.90元，对应-3X、-8XPE。
奥飞数据	300738.SZ	奥飞数据系国内领先的IDC服务商。公司对内通过不断的资本投入加快自建数据中心，对外收购完善全国布局，卡位核心城市加速全国机柜部署。预计23、24年摊薄EPS分别为0.15、0.22元，对应71X、54XPE。
数据港	603881.SH	数据港系新兴高耗能产业数据中心企业。公司在浸没式液冷、光伏发电、余热回收等方面的实践应用进行了一系列积极探索。相关技术有助于降低数据中心全生命周期能耗和碳排放，解决 IDC 选址的困境。预计23、24 年摊薄EPS 分别为0.27、0.34 元，对应74X、55X PE。
紫光股份	000938.SZ	紫光股份系全球新一代云计算基础设施建设和行业智能慧应用服务的领先者。公司致力于构建“云—网—算—存—端”全栈业务布局，进一步提出行业赋能战略“AIforALL”。预计23、24 年摊薄EPS分别为0.80、0.99 元，对应25X、20X PE。
高新发展	000628.SZ	高新发展是功率半导体行业的新兴公司，公司主营业务为建筑业和功率半导体业务。功率半导体业务为公司战略转型确立的具备硬核技术的新主业，建筑业是公司目前主要收入及利润来源，是公司打造强大功率半导体主业的坚实基础。公司2023 年报对应EPS 约为1.04 元，对应73X PE。
云赛智联	600602.SH	云赛智联定位于中立第三方高端数据中心运营商，数据中心建设是云赛智联“做优IDC”战略路径的重要基石。公司主营业务是以云计算和大数据、行业解决方案及智能化产品为核心业务的专业化信息技术服务。预计23、24 年摊薄EPS 分别为0.14、0.18 元，对应82X、72X PE。
锐捷网络	301165.SZ	锐捷网络是领先的ICT 基础设施及行业解决方案提供商，主营业务为网络设备、网络安全产品及云桌面解决方案的研发、设计和销售。预计23、24 年摊薄EPS 分别为0.71、1.25 元，对应54X、28X PE。
工业富联	601138.SH	工业富联是全球领先的通信网络设备、云服务设备、精密工具及工业机器人专业设计制造服务商，为客户提供以工业互联网平台为核心的新形态电子设备产品智能制造服务。预计23、24 年摊薄EPS 分别为1.06、1.28 元，对应14X、19X PE。
华勤技术	603296.SH	华勤技术是专业从事智能硬件产品的研发设计、生产制造和运营服务的平台型公司，隶属智能硬件ODM 行业。预计23、24 年摊薄EPS 分别为3.74、4.18 元，对应21X、17X PE。
