# Supplementary material
Source: ML conference proceedings conference paper supplement (https://openreview.net/forum?id=xg0fmtqh8d)
Supplement: supplementary_material [file 5_计算机行业周报:黄仁勋表示英伟达将进一步扩大产能,OpenAI发布o1大模型.xlsx]

## Sheet: Sheet
	投资建议	预测个股相对同期证券市场代表性指数涨幅
1	买入	>20%
2	增持	10%—20%
3	中性	-10%—10%
4	卖出	<-10%
