# Supplementary material
Source: ML conference proceedings conference paper supplement (https://openreview.net/forum?id=xg0fmtqh8d)
Supplement: supplementary_material [file 6_计算机行业周报:Adobe携手OpenAI重塑视频编辑生态,Gaudi 3芯片引领AI算力新突破.xlsx]

## Sheet: Sheet
应用	应用类型	归属公司	周平均访问量(M)	访问量环比	平均停留时长
ChatGPT	聊天机器人	OpenAI	420.8M	3.52%	0:07:24
Bing	搜索	微软	332.7M	5.09%	0:07:00
Discord	游戏社区	微软	251.9M	-1.76%	0:06:40
Canva	在线设计	Canva	134.5M	1.43%	0:09:58
Github	代码托管	微软	107.1M	-0.37%	0:07:26
Gemini	聊天机器人	谷歌	96.4M	2.39%	0:06:31
DeepL	翻译工具	DeepL	63.2M	4.43%	0:08:45
Character.AI	聊天机器人	Character.Al	53.5M	-0.83%	0:14:05
NotionAI	文本/笔记	Notion	39.1M	1.09%	0:08:23
QuillBot	释义工具	QuillBot	14.6M	3.41%	0:05:41
Kimi	聊天机器人	Moonshot AI	4.3M	9.13%	0:03:13
Zoom	在线会议	Zoom	2.8M	4.93%	0:01:26
