# Supplementary material
Source: ML conference proceedings conference paper supplement (https://openreview.net/forum?id=xg0fmtqh8d)
Supplement: supplementary_material [file 7_中小盘周报:小鹏、蔚来端到端模型上车,智驾拐点加速到来.xlsx]

## Sheet: Sheet
时间	事件	影响主题
2024/8/15-2024/8/16	第六届电动汽车与电池安全会议	汽车
2024/8/16-2024/8/16	2024中国(深圳)汽车智能座舱技术大会	汽车
2024/8/27-2024/8/27	2024中国国际汽车电子大会	汽车
2024/8/28-2024/8/28	2024新能源汽车电子创新技术论坛	汽车
