# Supplementary material
Source: ML conference proceedings conference paper supplement (https://openreview.net/forum?id=xg0fmtqh8d)
Supplement: supplementary_material [file 8_计算机行业周报:板块有望迎来估值强修复,OpenAI宣布推出canvas.xlsx]

## Sheet: Sheet
表现	1M	3M	12M
计算机(申万)	37.9	28.7	-9.0
沪深300	24.3	17.1	8.9
