# Supplementary material
Source: ML conference proceedings conference paper supplement (https://openreview.net/forum?id=xg0fmtqh8d)
Supplement: supplementary_material [file 9_计算机行业:上海提出建设全国首批低空省际通航城市,谷歌发布智能语音助手Gemini Live.xlsx]

## Sheet: Sheet
涨幅前10位				跌幅前10位
序号	股票简称	涨跌幅%	换手率%	序号	股票简称	涨跌幅%	换手率%
1	凯旺科技	51.90	162.49	1	任子行	-24.43	38.38
2	联合光电	32.45	19.19	2	*ST威创	-22.41	0.37
3	慧博云通	21.77	36.05	3	ST汇金	-10.80	21.60
4	佳创视讯	20.30	54.42	4	彩讯股份	-10.50	12.83
5	优博讯	18.31	20.57	5	航天宏图	-9.77	14.58
6	安博通	17.46	6.58	6	金溢科技	-9.59	60.16
7	雷柏科技	16.67	26.98	7	吉大正元	-9.00	19.67
8	朗科科技	15.95	35.34	8	天润科技	-8.86	50.28
9	古鳌科技	15.08	49.62	9	ST易联众	-8.78	12.76
10	力鼎光电	14.56	3.79	10	*ST银江	-7.83	28.43
