# Supplementary material
Source: ML conference proceedings conference paper supplement (https://openreview.net/forum?id=xg0fmtqh8d)
Supplement: supplementary_material [file 10_计算机:中泰科技:金融科技为号,抓住市场最强音.xlsx]

## Sheet: Sheet
证券代码	证券简称	区间最高收盘价(元)	区间最高收盘价日	区间最低收盘价(元)	区间最低收盘价日	最大涨幅(%)
300033.SZ	同花顺	169.04	2015-04-22	12.49	2014-05-16	1253%
300059.SZ	东方财富	101.82	2015-06-04	9.83	2014-07-24	936%
601519.SH	大智慧	33.54	2015-04-21	5.87	2014-06-30	471%
