# Supplementary material
Source: ML conference proceedings conference paper supplement (https://openreview.net/forum?id=xg0fmtqh8d)
Supplement: supplementary_material [file 12_计算机行业2024年中期投资策略:新时代、新科技、新估值.xlsx]

## Sheet: Sheet
序号	代码	证券简称	细分领域	涨跌幅
1	300290.SZ	荣科科技	医疗IT	70.61%
2	603516.SH	淳中科技	视频与安防	58.05%
3	688100.SH	威胜信息	能源IT	27.48%
4	300552.SZ	万集科技	车联网	25.07%
5	600131.SH	国网信通	能源IT	24.49%
6	000938.SZ	紫光股份	云基础IT	18.45%
7	002970.SZ	锐明技术	汽车安全	18.06%
8	002869.SZ	金溢科技	车联网	11.41%
9	688188.SH	柏楚电子	智能制造	9.39%
10	688500.SH	慧辰股份	政府IT	8.92%
11	300017.SZ	网宿科技	云基础IT	8.06%
12	000977.SZ	浪潮信息	云基础IT	6.27%
13	002380.SZ	科远智慧	智能制造	4.23%
14	688208.SH	道通科技	汽车安全	1.93%
15	000555.SZ	神州信息	金融IT	1.59%
16	688568.SH	中科星图	军工IT	-0.29%
17	300542.SZ	新晨科技	军工IT	-0.31%
18	003029.SZ	吉大正元	加密安全	-0.81%
19	603019.SH	中科曙光	信创	-1.20%
20	300002.SZ	神州泰岳	运营商IT	-1.70%
