# Supplementary material
Source: ML conference proceedings conference paper supplement (https://openreview.net/forum?id=xg0fmtqh8d)
Supplement: supplementary_material [file 13_1-4月行情回顾及23年&24Q1财报点评:计算机行业:曙光初现,静待复苏.xlsx]

## Sheet: Sheet
2023年底前十大重仓股				2024年Q1前十大重仓股
排名	证券代码	证券名称	持股总市值/亿元	排名	证券代码	证券名称	持股总市值/亿元
1	688111.SH	金山办公	202.51	1	688111.SH	金山办公	175.32 ↓
2	002415.SZ	海康威视	201.11	2	002415.SZ	海康威视	143.84 ↓
3	600845.SH	宝信软件	74.03	3	002230.SZ	科大讯飞↑	64.53 ↓
4	002230.SZ	科大讯飞	66.52	4	002920.SZ	德赛西威↑	49.34 ↓
5	002920.SZ	德赛西威	52.53	5	002180.SZ	纳思达↑	39.67 ↑
6	300033.SZ	同花顺	44.34	6	000977.SZ	浪潮信息↑	39.56 ↑
7	600570.SH	恒生电子	37.95	7	603019.SH	中科曙光↑	30.16 ↓
8	002180.SZ	纳思达	37.12	8	002236.SZ	大华股份↑	20.74 ↑
9	300454.SZ	深信服	36.04	9	300017.SZ	网宿科技↑	19.43 ↑
10	002236.SZ	大华股份	32.42	10	300454.SZ	深信服↓	18.58 ↓
