# Supplementary material
Source: ML conference proceedings conference paper supplement (https://openreview.net/forum?id=xg0fmtqh8d)
Supplement: supplementary_material [file 14_计算机周报:信创的资金从哪里来.xlsx]

## Sheet: Sheet
	2018	2019	2020	2021	2022	合计
服务器总出货量(万台)	330	318	354	382	377	1761
增速	26.0%	-3.7%	11.5%	7.7%	-1.3%
