# Supplementary material
Source: ML conference proceedings conference paper supplement (https://openreview.net/forum?id=xg0fmtqh8d)
Supplement: supplementary_material [file 15_金融|解读政治局会议最新表述:金融政策和财政政策的转向.xlsx]

## Sheet: Sheet
	2016年	2018年	2020年	2024年
时间	10月	10月	2月、3月	9月
背景	国内供给侧改革海外经济低迷	中美贸易摩擦加剧	疫情冲击	经济复苏较弱
