# Supplementary material
Source: ML conference proceedings conference paper supplement (https://openreview.net/forum?id=xg0fmtqh8d)
Supplement: supplementary_material [file 16_计算机行业动态点评:计算机“牛市利刃”之SaaS.xlsx]

## Sheet: Sheet
证券代码	证券名称	总市值(亿元)						PS估值
		19	20	21	22	23	24Q3	19	20	21	22	23	24Q3	平均
688111.SH	金山办公	756	1,895	1,222	1,220	1,460	1,232	67	120	54	37	38	27	57
600570.SH	恒生电子	624	1,095	908	769	546	433	19	28	22	14	8	6	16
600588.SH	用友网络	711	1,435	1,174	830	608	393	9	17	14	9	7	4	10
3888.HK	金山软件	248	578	384	318	298	356	3	8	6	4	4	4	5
300454.SZ	深信服	468	1,026	794	468	303	295	15	22	15	7	4	4	11
0268.HK	金蝶国际	232	922	681	520	374	291	7	27	16	11	7	5	12
688615.SH	合合信息	/	/	/	/	/	245	/	/	/	/	/	21	21
002410.SZ	广联达	383	934	761	714	285	223	13	26	19	13	4	3	13
2556.HK	迈富时	/	/	/	/	/	208	/	/	/	/	/	17	17
002153.SZ	石基信息	417	333	431	315	266	200	13	9	13	10	10	7	10
300624.SZ	万兴科技	51	72	72	38	130	111	9	10	7	4	11	8	8
603039.SH	泛微网络	89	216	182	131	122	97	9	17	12	7	5	4	9
6657.HK	百望股份	/	/	/	/	/	73	/	/	/	/	/	10	10
688095.SH	福昕软件	/	116	66	41	64	61	/	32	14	8	11	10	15
0909.HK	明源云	/	775	286	123	51	56	/	45	13	7	3	3	14
2013.HK	微盟集团	69	265	164	152	73	52	5	13	6	8	3	2	6
688365.SH	光云科技	/	105	56	32	46	34	0	23	11	6	9	7	9
9669.HK	北森控股	/	/	/	/	33	25	/	/	/	/	4	3	4
688109.SH	品茗科技	/	/	28	15	22	24	/	/	7	3	5	6	5
688369.SH	致远互联	45	59	55	53	40	21	8	8	7	5	4	2	6
