# Supplementary material
Source: ML conference proceedings conference paper supplement (https://openreview.net/forum?id=xg0fmtqh8d)
Supplement: supplementary_material [file 17_海外硬科技龙头复盘研究系列(十一):计算机行业:英伟达成长启示录:保持远见、不断奔跑,用心打好逆风球.xlsx]

## Sheet: Sheet
参数	NV1 显卡	Voodoo 显卡
纹理像素填充率	5 百万像素/秒	50 百万像素/秒
核心频率	75 MHz	50 MHz
显存类型	4 MB EDO DRAM	4MB/6MB EDO DRAM
显存频率	70 MHz	50 MHz
显存带宽	0.4 GB/s	0.8GB/s
最大分辨率	600 x 1200	840 x 640
3D技术支持	Quad Texture Mapping,Gouraud Shading	Texture Mapping,Gouraud Shading
像素填充率	12 百万像素/秒	50 百万像素/秒
