# Supplementary material
Source: ML conference proceedings conference paper supplement (https://openreview.net/forum?id=xg0fmtqh8d)
Supplement: supplementary_material [file 18_海外垂类AI专题(7):美股SaaS一季报跟踪,AI效果明显分化.xlsx]

## Sheet: Sheet
业务	公司名称	收入（百万美元）
		2022	2023	2024E	24Q1	24Q1公司指引	Beat/Miss	24Q2公司指引	2024公司指引
云业务	AWS	80096	90757	106754	25037		Beat		一季度Capex139亿美元,23年Capex481亿美元，根据公司口径预计24年同比+20%到580亿美元。
	YoY	29%	13%	18%	17%	15%		预测17%
	Google云	26280	33088	41611	9574		Beat		一季度Capex120亿美元,23年Capex322亿美元，根据公司口径预计24年同比+55%到500亿美元。
	YoY	37%	26%	26%	28%	26%		预测25%
	微软智能云	81772	96213	116470	26708		Beat		一季度Capex140亿美元,23年Capex412亿美元，根据公司口径预计24年同比+33%到550亿美元。
	YoY	21%	18%	21%	21%	18%		18%-20%
	微软Azure	51275	65714	84771	19000		Beat
	YoY		28%	29%	31%	28%		30%-31%
云数据存储	Snowflake	2,000	2,740	3,430	829	745-750	Beat	订阅805-810	上调2025财年产品订阅收入33亿美元（同比+24%，前值32.5），Non-GAAP毛利率75%，Non-GAAP营业利润率3%（前值6%）
	YoY	64%	37%	25%	33%	26%-27%		19.4%-20.2%
数据库服务	MongoDB	1,250	1,650	1,910	451	436-440	Beat	460-464	下调指引25财年18.8-19亿美金（+14%，前值19-19.3），下调指引Non-GAAP营业利润指引1.68-1.83亿美元（前值1.86-2.01）。
	YoY	43%	32%	16%	22%	19%		19%
云数据监控	Datadog	1,680	2,130	2,600	611	587-591	Beat	620-624	上调2024财年收入25.9亿美元-26.1亿美元（+21.6%-22.5%，前值25.55-25.75亿美元）。Non-GAAP营业利润5.85亿美元-6.05亿美元（前值5.35-5.55亿）。指引二季度Non-GAAP营业利润1.34亿美元-1.38亿美元。
	YoY	63%	27%	22%	27%			21.6%-22.5%
内容制作设计	Adobe	17,610	18,580	21,650	5310	5250-5300	Beat	5330-5380	Adobe24Q2（截止5月31日）数字媒体业务净新增ARR4.87亿美元，高于此前业绩会指引4.4亿美元。Adobe指引24Q3数字媒体净新增ARR约4.6亿美元。
	YoY	12%	6%	17%	10%			9%-10%
企业服务订阅SaaS	微软Office	65856	73648	82486	19570		in-line		公司指引25财年（24年6月30-25年6月30）微软收入双位数增长，经营利润双位数增长。
	YoY		12%	12%	12%	11%-12%		9%-10%，M365 +14%CC
	Salesforce	31,000	34,560	37,670	9130	9120-9170	in-line	9200-9250	维持25财年收入指引为377-380亿美元，同比+8%-9%，并将25财年订阅收入下调至略低于10%(前值10%)，全年GAAP OPM指引下调至19.9%（前值20.4%），并将Non-GAAP OPM指引维持在32.5%
	YoY	17%	11%	9%	11%	11%		7%-8%
	ServiceNow	7,250	8,970	10,900	2600	2510-2515	Beat	2525-2530	维持2024全年指订阅收入为 105.6-105.75 亿美元（+21.5%-22%），Non-GAAP订阅毛利84.5%（持平），Non-GAAP营业利润率29%。指引Q2 Non-GAAP营业利润率25%（环比-5pcts）。
	YoY	23%	24%	22%	25%	24%-24.5%		21.5%-22%
数据搜索、安全	Elastic	1,190	1,400	1,630	335	328-330	Beat	25FYQ1 343-345	2025财年预计总收入在14.68亿至14.8亿美元之间，同比+16%。预计Non-GAAP运营利润率约为11.7%-12.3%。 25FYQ1（截至2024年7月30日）Non-GAAP运营利润率在9.2%至9.4%之间。
	YoY	18%	18%	16%	20%	18%		17%
网络与终端安全	Crowdstrike	2,170	2,990	3,880	921	902-906	Beat	958-961	上调FY2025收入预计在39.76-40.11亿美元（同比约+17.8%，前值为39.2-39.9亿美元），二季度Non-GAAP运营收入2.08-2.11亿美元之间。
	YoY	50%	38%	30%	33%
网络安全	Palo Alto Networks	6,040	7,420	8,390	1980	1950-1980	in-line	2150-2170	FY24全年收入由之前的79.5-80亿美元小幅上调至79.9-80.1亿美元增长16%，Billings由之前的101-102亿美元上调至101.3-101.8亿美元。
	YoY	27%	23%	13%	15%			10%-11%
数据分析	Palantir	1,910	2,230	2,700	634		Beat	649-653	上调24年营收26.77-26.89亿美元(同比+20%-20.4%，前值26.5-26.7亿美元)。上调美国商业收入超过6.61亿美元（前值6.4亿美元），增长率至少为45%。运营利润上调至8.68-8.8亿美元（前值为8.34亿至8.5亿美元）。调整后自由现金流为8亿美元-10亿美元。
	YoY	24%	17%	21%	21%	17%-17.5%		21.5%-22.4%
