# Supplementary material
Source: ML conference proceedings conference paper supplement (https://openreview.net/forum?id=xg0fmtqh8d)
Supplement: supplementary_material [file 19_汽车行业专题研究:特斯拉Robotaxi发布在即,产业有望迎来加速发展.xlsx]

## Sheet: Sheet
企业	开始研发时间	国家	主要测试地区	累计实测和运营里程	车队规模	订单量	营收情况
Waymo	2009	美国	亚利桑那州凤凰城、加州旧金山、德克萨斯州奥斯汀、洛杉矶	超6440万公里(4000万英里)	大于700辆	2023年累计接单70万单；2024年8月，每周可接付费订单突破10万单。	2022年营收约200万美元；若按单均20美元测算，waymo在2024年营收约为5200万美元。
Cruise	2013	美国	加州旧金山	483万公里(300万英里,	约300辆	-	-
百度	2013	中国	长沙、广州、上海、深圳、武汉、北京等11个城市	超9000万公里	大于1000辆	2023年出行服务订单超过300万单；2024上半年自动驾驶订单超过170万单；截至7月28日，全国累计提供700万次乘车服务。	基于2024年上半年数据假设全年订单，2024年营收有望接近七千万元。
		美国	加州旧金山、洛杉矶等
小马智行	2016	中国	北京、广州、上海、深圳等	超3500万公里(截至2024年6月)	大于400	截至2022年4月，完成自动驾驶服务70万次订单。	基于日均数据假设全年订单，在深营收可达150万元左右。
		美国	弗里蒙特等
文远知行	2017	中国	广州、北京、深圳、上海、内蒙古鄂尔多斯市等	2500万公里	大于500	2019年12月01日至31日，共完成8,396个出行订单，日均出行服务270.8次，单天最多订单达到438单，服务订单总里程达41,140公里，共服务4,683名用户。	基于2019年12月数据假设全年订单，年均营收可达200万元。
		美国	加州圣何塞
