# Supplementary material
Source: ML conference proceedings conference paper supplement (https://openreview.net/forum?id=xg0fmtqh8d)
Supplement: supplementary_material [file 20_计算机行业周报:百度萝卜快跑爆火出圈,特斯拉或推迟发布Robotaxi.xlsx]

## Sheet: Sheet
		工作日	休息日
起步费（3公里，10分钟）	00:00-07:00	7元	7元
	07:00-09:00	8元
	09:00-17:00	7元
	17:00-20:00	8元
	20:00-0:00	7元
里程费（每公里）	00:00-07:00	1.65元	1.7元
	07:00-09:00	2元
	09:00-17:00	1.65元
	17:00-20:00	1.80元
	20:00-0:00	1.65元
时长费（每分钟）	00:00-07:00	0.2元	0.2元
	07:00-09:00	0.3元
	09:00-17:00	0.2元
	17:00-20:00	0.25元
	20:00-0:00	0.2元
远途费（每公里）	超出20公里	0.5元	0.5元
