# Supplementary material
Source: ML conference proceedings conference paper supplement (https://openreview.net/forum?id=xg0fmtqh8d)
Supplement: supplementary_material [file 21_银行行业深度报告:“风险新规”后,银行资产质量安全边际勘测.xlsx]

## Sheet: Sheet
处置方式	邮储银行			招商银行			平安银行			民生银行			光大银行			华夏银行
	2021	2022	2023	2021	2022	2023	2021	2022	2023	2021	2022	2023	2021	2022	2023	2021	2022	2023
表内处置总额	357.0	493.8	578.8	500.3	579.9	581.1				839.1	840.8	699.3	745.3	718.0	840.7	389.1	351.8	479.0
现金清收	166.3	194.7	218.3	131.6	128.5	112.0	166.6	164.3	122.8	114.2	116.0	100.9	165.6	227.7	303.6	121.8	76.5	121.7
核销	140.7	167.8	194.0	235.8	242.5	226.5	404.2	598.0	685.9	348.6	357.8	251.6	385.2	364.6	331.3	234.4	253.5	338.0
资产证券化	32.4	74.0	131.4	106.0	158.6	225.9				74.8	82.5	105.2	135.5	122.2	127.2
其他合计	17.6	57.4	35.1	26.9	50.3	16.7	2.2	45.0	11.7	301.5	284.4	241.6	59.0	3.5	78.6	33.0	21.8	19.3
表外收回已核销	40.2	39.4	46.9	98.8	89.7	88.2	158.9	203.6	191.4	52.0	72.2	93.4	57.6	75.1	94.4	24.6	69.5	29.7
