# Supplementary material
Source: ML conference proceedings conference paper supplement (https://openreview.net/forum?id=xg0fmtqh8d)
Supplement: supplementary_material [file 22_智能驾驶系列报告二:特斯拉FSD:智驾全栈自研开启宏图新篇.xlsx]

## Sheet: Sheet
硬件版本	SOP	处理平台/主芯片	冗余控制	算力(TOPS)	功耗(W)	图像处理能力(fps)
HW1.0	2014.10	Mobileye EyeQ3	无	0.256	25	36
HW2.0	2016.10	Nvidia Drive PX2	部分	20	250	110
HW2.5	2017.08	Nvidia Drive PX2+	完全	20	300	110
HW3.0	2019.04	Tesla FSD	完全	144	220	2,300
HW4.0	2024.02	Tesla FSD	完全	720	80	—
AI 5	2025下半年	Tesla FSD	完全	7200	320-400	—
