# Supplementary material
Source: ML conference proceedings conference paper supplement (https://openreview.net/forum?id=xg0fmtqh8d)
Supplement: supplementary_material [file 23_医药生物:静丙:供不应求,量价齐升.xlsx]

## Sheet: Sheet
项目	美国	欧洲部分国家	中国
频次	≤2次/周 最低间隔72小时	≤2 次/周 最低间隔48小时	≤2次/月 最低间隔14天
采集量	690-880ml	≤650ml	≤580ml(含抗凝剂)
回收血浆	可用于生产加工	可用于生产加工	不可用于生产加工
