# Supplementary material
Source: ML conference proceedings conference paper supplement (https://openreview.net/forum?id=xg0fmtqh8d)
Supplement: supplementary_material [file 24_人工智能周报(24年第17周):GitLab极狐发布人工智能编程助手,中国首个Sora级模型Vidu发布.xlsx]

## Sheet: Sheet
公司代码	公司名称	投资评级	昨收盘(港元/美元)	总市值(百万港元/美元)	EPS		PE
					2023E	2024E	2023E	2024E
0700.HK	腾讯控股	买入	348.4	3,290,761	19.5	22.2	17	15
9999.HK	网易-S	买入	149.2	479,049	11.2	12.0	12	12
3690.HK	美团-W	买入	115.6	720,750	5.8	7.9	18	14
9888.HK	百度集团-SW	增持	100.9	283,047	10.2	11.4	9	8
1024.HK	快手-W	买入	56.5	245,434	4.0	5.7	13	9
1357.HK	美图公司	买入	3.3	14,965	0.1	0.1	34	22
9988.HK	阿里巴巴-SW	买入	75.3	1,534,180	8.0	9.2	9	8
9618.HK	京东集团-SW	增持	117.7	374,690	11.3	12.5	10	9
