# Supplementary material
Source: ML conference proceedings conference paper supplement (https://openreview.net/forum?id=xg0fmtqh8d)
Supplement: supplementary_material [file 25_人工智能周报(24年第29周):微软AI设计应用全平台上线,阿里云开源两款新语音基座模型.xlsx]

## Sheet: Sheet
公司代码	公司名称	投资评级	昨收盘(港元/美元)	总市值(百万港元/美元)	EPS		PE
					2023E	2024E	2023E	2024E
0700.HK	腾讯控股	优于大市	364.0	3,392,834	21.25	23.95	16	14
9999.HK	网易-S	优于大市	141.8	455,289	11.2	12.0	12	11
3690.HK	美团-W	优于大市	117.5	731,027	5.8	7.9	19	14
9888.HK	百度集团-SW	优于大市	88.2	247,280	10.7	11.4	8	7
1024.HK	快手-W	优于大市	45.2	197,285	4.0	5.7	11	7
9988.HK	阿里巴巴-SW	优于大市	73.8	1,427,697	8.0	9.2	9	7
PDD.O	拼多多	优于大市	133.0	184,762	17.9	25.9	13	9
1357.HK	美图公司	优于大市	2.4	10,839	0.1	0.1	25	16
