# Supplementary material
Source: ML conference proceedings conference paper supplement (https://openreview.net/forum?id=xg0fmtqh8d)
Supplement: supplementary_material [file 26_人工智能周报(24年第16周):百度推出AI原生操作系统DuerOS X,Meta发布Llama3开源大语言模型.xlsx]

## Sheet: Sheet
公司代码	公司名称	投资评级	昨收盘(港元/美元)	总市值(百万港元/美元)	EPS		PE
					2024E	2025E	2024E	2025E
0700.HK	腾讯控股	买入	303.8	2,869,498	19.5	22.2	14	13
9999.HK	网易-S	买入	142.8	460,333	11.2	12.0	12	11
3690.HK	美团-W	买入	95.3	594,182	5.8	7.9	15	11
9618.HK	京东集团-SW	买入	97.3	309,748	11.3	12.5	8	7
1024.HK	快手-W	买入	44.4	192,655	4.0	5.7	10	7
9988.HK	阿里巴巴-SW	买入	66.7	1,358,962	8.0	9.2	8	7
PDD.O	拼多多	买入	113.5	150,781	17.9	25.9	11	8
1357.HK	美图公司	买入	2.9	13,241	0.1	0.1	23	15
