# Supplementary material
Source: ML conference proceedings conference paper supplement (https://openreview.net/forum?id=xg0fmtqh8d)
Supplement: supplementary_material [file 27_医药生物行业专题报告:国家医保谈判药品可及性分析报告:谈判药品落地“最后一公里”到底有多远]

## Sheet: Sheet
项目	第三代	第二代			第一代
药品名称	洛拉替尼	阿来替尼	恩莎替尼	塞瑞替尼	克唑替尼
获批上市时间	2022-04-29(CN)	2018-08-12(CN)	2020-11-17(CN)	2018-05-31(CN)	2013-01-22(CN)
公司	Pfizer;基石药业	Chugai Pharmaceutical(罗氏)	贝达药业;Xcovery	Novartis;AstraZeneca	Sugen(Pfizer)
试验疾病	非小细胞肺癌	非小细胞肺癌	非小细胞肺癌	非小细胞肺癌	非小细胞肺癌
试验方案	洛拉替尼;克唑替尼	阿来替尼;克唑替尼	恩莎替尼;克唑替尼	塞瑞替尼;化疗	克唑替尼;化疗
试验阶段	III期	III期	III期	III期	III期
入组数	296	207	290	376	343
总体评价	优效	优效	优效	优效	优效
疗法类型	一线	一线	一线	一线	一线
相对风险	0.19	0.34	0.51	0.55	0.45
mPFS	5年PFS 60% vs 9.3 months	16.8 vs 10.2 months	25.8 vs 12.7 months	16.6 vs 8.1 months	10.9 vs 7.0 months
ORR	77% vs 59%	92% vs 79%	脑转移:64% vs21%	脑转移:46.3% vs 21.2%	74% vs 45%
生物标记物	ALK-positive	ALK positive	ALK-positive	ALK positive	ALK positive
参考文献	2024 ASCO	Lancet. 2017 07 01;390	JAMA Oncol . 2021 Sep 2.	Lancet. 2017 03 04;389 N	Engl J Med. 2014 Dec 04;371
