# Supplementary material
Source: ML conference proceedings conference paper supplement (https://openreview.net/forum?id=xg0fmtqh8d)
Supplement: supplementary_material [file 28_医药健康行业研究:中美韩医美对比借鉴:未来发展路径与行业轨迹分析.xlsx]

## Sheet: Sheet
序号	产品名称	注册分类	临床用途	注册证有效期
1	医用羟丙基甲基纤维素-透明质酸钠溶液(逸美)	III	该产品用于皮肤真皮深层至皮下浅层之间注射填充，以纠正额部皱纹和中重度鼻唇部皱纹。	2027 年9 月6 日
2	医用含聚乙烯醇凝胶微球的透明质酸钠-羟丙基甲基纤维素凝胶(宝尼达)	III	该产品用于皮肤真皮深层及皮下浅层之间注射填充，以纠正中重度额部皱纹和中重度鼻唇部皱纹。	2026 年3 月16 日
3	注射用修饰透明质酸钠凝胶(爱芙莱)	III	该产品用于皮肤真皮中层至深层注射填充，以纠正中、重度鼻唇沟。	2024 年12 月26 日
4	注射用透明质酸钠复合溶液(嗨体)	III	该产品用于皮内真皮层注射填充，以纠正颈部中重度皱纹。	2026 年3 月18 日
5	医用透明质酸钠-羟丙基甲基纤维 素凝胶(逸美一加一)	III	该产品用于皮肤皮下浅层至深层之间的填充，以纠正中重度额部皱纹和中重度鼻唇沟皱纹。	2026 年2 月25 日
6	聚对二氧环己酮面部埋植线(紧恋)	III	用于皮下脂肪层植入纠正中、重度鼻唇沟皱纹。	2024 年5 月7 日
7	含左旋乳酸-乙二醇共聚物微球的 交联透明质酸钠凝胶(濡白天使)	III	该产品适用于真皮深层、皮下浅层及深层注射填充纠正中、重度鼻唇沟皱纹。	2026 年6 月23 日
8	生物蛋白海绵	III	适用于新鲜创面、溃疡、褥疮等组织修复与愈合。	2025 年5 月20 日
9	止血愈合敷料	II	本产品用于手术切口、体外浅表创伤和擦伤创面的止血及愈合。	2026 年4 月6 日
