# Supplementary material
Source: ML conference proceedings conference paper supplement (https://openreview.net/forum?id=xg0fmtqh8d)
Supplement: supplementary_material [file 29_2024年中国特发性肺纤维化(IPF)治疗药物行业概览:创新肺纤维化靶向药物进入医保,患者端受益显著.xlsx]

## Sheet: Sheet
治疗方式	适用人群	作用机制	优点	缺点
药物治疗
吡非尼酮	轻到中毒肺功能障碍的IPF患者	吡非尼酮是一种多效性的吡啶化合 物，抑制转化因子β(TGF-β)等靶点，降低细胞增殖、纤维化相关蛋白的产生和细胞外基质的合成和聚集，减少多种刺激引起的炎症细胞聚集	能显著地延缓用力呼气肺活量的下降速率，可能在一定程度上降低病死率	副作用包括光过敏、乏力、皮疹、胃部不适和厌食，仅对轻、中度纤维化有效，且只能延缓疾病进展，耐受性较差
尼达尼布	轻到中度肺功能障碍的IPF患者	是一种多靶点酪氨酸激酶抑制剂，能够抑制血小板衍化生长因子受体、血管内皮生长因子受体及成纤维细胞生长因子受体	能显著地减少IPF患者FVC下降的绝对值，一定程度上缓解疾病进程	具有肝损害和肾损害的不良反应，仅对轻、中度纤维化有效，且只能减缓疾病进展，耐受性较差
非药物治疗
氧疗	静息状态低氧血症的IPF患者	通过氧疗提高血浆与组织之间的氧 分压梯度以促进氧的弥散	可改善患者的缺氧情况，对患者的预后有显著改善作用	日常生活中存在一定限制，患者在长期接受氧疗后可能会产生缺氧恐惧
机械通气	IPF呼吸衰竭患者	利用机械装置来代替、控制或改变 自主呼吸运动，以维持气道通畅、改善通气和氧合、防止机体缺氧和二氧化碳蓄积	改善肺部功能及血气分析指标，改善部分IPF患者的缺氧，延长生存时间	许多小样本研究表明机械通气对于IPF治疗表现不佳，对患者的预后无明显改善作用;2011美国特发性肺纤维化诊治询证指南对大多数IPF患者不推荐使用机械通气的治疗方式
肺康复	大多数IPF患者可以推荐接受肺康复治疗，但具体适应证值得一步研究	包括呼吸生理治疗，肌肉训练(全身性运动和呼吸肌锻炼)，营养支持，精神治疗和教育	减轻呼吸困难症状，降低急性加重次数，提高运动耐力，提高生活自理能力	肺康复的长期效益目前仍不清楚，且肺康复治疗较为复杂，要根据患者的具体情况，制定个体化的训练方案和详尽的时间表
肺移植	对于疾病发展到终末期、呼吸衰竭阶段的IPF患者	是一种外科手术，病人的病变肺部分或全部被来自供体的肺替代	不断发展的肺移植技术已成为各种终末期肺疾病的主要治疗手段之一。肺移植可改善IPF患者的生活质量，提高生存率，5年生存率达50%-56%	移植器官的缺乏、移植后的排异反应和昂贵的费用等问题仍是影响肺移植的重要因素
