# Supplementary material
Source: ML conference proceedings conference paper supplement (https://openreview.net/forum?id=xg0fmtqh8d)
Supplement: supplementary_material [file 31_计算机行业周报:“萝卜快跑”无人订单量大幅增长,自动驾驶板块有望受益.xlsx]

## Sheet: Sheet
股票投资评级：	分析师给出下列评级中的其中一项代表其根据公司基本面及（或）估值预期以报告日起6个月内公司股价相对于同期市场基准指数表现的看法。
	买入	股价表现将强于基准指数20%以上
	增持	股价表现将强于基准指数5-20%
	中性	股价表现将介于基准指数±5%之间
	减持	股价表现将弱于基准指数5%以上
行业投资评级：	分析师给出下列评级中的其中一项代表其根据行业历史基本面及(或)估值对所研究行业以报告日起12个月内的基本面和行业指数相对于同期市场基准指数表现的看法。
	增持	行业基本面看好，相对表现优于同期基准指数
	中性	行业基本面稳定，相对表现与同期基准指数持平
	减持	行业基本面看淡，相对表现弱于同期基准指数
相关证券市场基准指数说明：A股市场以沪深300指数为基准；港股市场以恒生指数为基准；新三板市场以三板成指（针对协议转让标的）或三板做市指数（针对做市转让标的）为基准指数。
