# Supplementary material
Source: ML conference proceedings conference paper supplement (https://openreview.net/forum?id=xg0fmtqh8d)
Supplement: supplementary_material [file 32_42家上市银行中报数据点评:利润增速稳定.xlsx]

## Sheet: Sheet
	Q1	H1	变化幅度(pct)
苏农银行	15.42%	8.78%	-6.63
苏州银行	19.82%	14.53%	-5.29
成都银行	26.98%	22.79%	-4.19
兰州银行	7.89%	3.85%	-4.04
常熟银行	15.01%	11.30%	-3.71
瑞丰银行	12.57%	8.87%	-3.70
宁波银行	24.18%	20.59%	-3.59
贵阳银行	11.64%	8.60%	-3.04
民生银行	3.73%	0.74%	-3.00
长沙银行	14.26%	11.68%	-2.57
青农商行	6.00%	3.62%	-2.38
西安银行	10.30%	7.96%	-2.34
中国银行	12.07%	9.77%	-2.31
北京银行	11.63%	9.62%	-2.02
平安银行	1.24%	-0.75%	-1.98
江阴银行	11.65%	9.73%	-1.93
华夏银行	2.40%	0.85%	-1.55
工商银行	11.60%	10.06%	-1.54
招商银行	7.57%	6.17%	-1.40
浙商银行	10.96%	9.62%	-1.34
光大银行	5.18%	4.00%	-1.18
建设银行	11.14%	10.03%	-1.11
邮储银行	11.80%	10.69%	-1.11
	Q1	H1	变化幅度(pct)
南京银行	14.62%	13.54%	-1.09
紫金银行	9.85%	8.77%	-1.08
张家港行	12.73%	11.66%	-1.07
农业银行	12.92%	11.92%	-1.00
无锡银行	11.80%	10.82%	-0.97
交通银行	6.79%	6.05%	-0.74
上海银行	5.40%	4.81%	-0.60
齐鲁银行	15.83%	15.31%	-0.51
沪农商行	6.14%	5.65%	-0.49
中信银行	4.42%	3.97%	-0.45
郑州银行	6.58%	6.18%	-0.40
重庆银行	11.03%	10.95%	-0.08
