# Supplementary material
Source: ML conference proceedings conference paper supplement (https://openreview.net/forum?id=xg0fmtqh8d)
Supplement: supplementary_material [file 33_银行业月度跟踪:板块取得3.7%相对收益,江浙地区的优质城农商行领涨.xlsx]

## Sheet: Sheet
时间	部门	政策文件	相关领域	主要内容
5月9日	国家金融监督管理总局	《关于商业银行代理保险业务有关事项的通知》	金融监管	《通知》主要有以下内容：一是取消银行网点与保险公司合作的数量限制。明确商业银行代理互联网保险业务、电话销售保险业务和其他保险业务，各级分支行及网点均不限制合作保险公司数量。二是明确双方合作层级。要求保险公司与商业银行开展合作，原则上应当由双方法人机构签订书面委托代理协议。确需由一级分支机构签订委托代理协议的，该一级分支机构应当事先获得其法人机构的书面授权。三是明确银行代理业务佣金标准。要求委托代理协议约定的佣金率不得超过保险公司法人机构产品备案的佣金水平。
5月9日	国家金融监督管理总局	《关于银行业保险业做好金融“五篇大文章”的指导意见》	金融监管	为深入贯彻落实中央金融工作会议关于做好科技金融、绿色金融、普惠金融、养老金融、数字金融“五篇大文章”的决策部署，在中央金融委的统筹指导下，围绕发展新质生产力，切实把金融“五篇大文章”落地落细，提高金融服务实体经济的质量和水平，金融监管总局印发了《关于银行业保险业做好金融“五篇大文章”的指导意见》
5月10日	证监会	《关于加强上市证券公司监管的规定》	金融监管	新规自发布之日起实施。《规定》要求上市证券公司端正经营理念，把功能性放在首要位置，聚焦主责主业，合理审慎融资，提高资金使用效率，把有限的资源更好配置在助力科技自立自强、促进经济高质量发展、服务居民财富管理等重点领域。
5月15日	证监会	《监管规则适用指引—发行类第10号》	金融监管	指引主要内容包括：一是要求发行人在招股说明书刊登致投资者的声明，说清上市目的、建立现代企业制度以及融资必要性等基本情况，督促发行人牢固树立正确“上市观”。二是明确“关键少数”可以就出现上市后业绩大幅下滑的情形作出延长股份锁定期的承诺，强化“关键少数”与投资者共担风险的意识。三是完善上市后分红政策的信息披露规则，以利于投资者形成稳定的回报预期。四是强化未盈利企业相关信息披露，要求其披露预计实现盈利情况等前瞻性信息，向投资者充分揭示未来发展前景，便于投资者作出决策。
5月15日	证监会	《证券市场程序化交易管理规定(试行）》	金融监管	《管理规定》紧紧围绕强监管、防风险、促高质量发展的主线，坚持“趋利避害、突出公平、有效监管、规范发展”的总体思路，对证券市场程序化交易(市场通常称为量化交易）监管作出全方位、系统性规定，是强化市场交易行为监管的重要举措。
5月17日	中国人民银行、国家金融监督管理总局	《关于调整个人住房贷款最低首付款比例政策的通知》	房地产政策	5月17日，中国人民银行、国家金融监督管理总局发布《关于调整个人住房贷款最低首付款比例政策的通知》，对于贷款购买商品住房的居民家庭，首套住房商业性个人住房贷款最低首付款比例调整为不低于15%，二套住房商业性个人住房贷款最低首付款比例调整为不低于25%。
5月17日	中国人民银行	《中国人民银行关于下调个人住房公积金贷款利率的通知》	房地产政策	中国人民银行决定，自2024年5月18日起，下调个人住房公积金贷款利率0.25个百分点，5年以下(含5年）和5年以上首套个人住房公积金贷款利率分别调整为2.35%和2.85%，5年以下(含5年）和5年以上第二套个人住房公积金贷款利率分别调整为不低于2.775%和3.325%。
5月17日	中国人民银行	《中国人民银行关于调整商业性个人住房贷款利率政策的通知》	房地产政策	中国人民银行调整商业性个人住房贷款利率政策，主要内容包括：一、取消全国层面首套住房和二套住房商业性个人住房贷款利率政策下限。二、中国人民银行各省级分行按照因城施策原则，指导各省级市场利率定价自律机制，根据辖区内各城市房地产市场形势及当地政府调控要求，自主确定是否设定辖区内各城市商业性个人住房贷款利率下限及下限水平(如有）。三、银行业金融机构应根据各省级市场利率定价自律机制确定的利率下限(如有），结合本机构经营状况、客户风险状况等因素，合理确定每笔贷款的具体利率水平。
5月17日	中国人民银行	《关于设立保障性住房再贷款有关事宜的通知》	房地产政策	这个政策的要点有以下几点：第一，保障性住房再贷款规模是3000亿元，利率1.75%，期限1年，可展期4次，发放对象包括国家开发银行、政策性银行、国有商业银行、邮政储蓄银行、股份制商业银行等21家全国性银行。银行按照自主决策、风险自担原则发放贷款。人民银行按照贷款本金的60%发放再贷款，可带动银行贷款5000亿元。第二，所收购的商品房严格限定为房地产企业已建成未出售的商品房，对不同所有制房地产企业一视同仁。第三，城市政府选定地方国有企业作为收购主体。该国有企业及所属集团不得涉及地方政府隐性债务，不得是地方政府融资平台，同时应具备银行授信要求和授信空间，收购后迅速配售或租赁。第四，自愿参与。
5月17日	自然资源部		房地产政策	准备出台妥善处置闲置土地、盘活存量土地的政策措施，支持地方政府从实际出发，酌情以收回、收购等方式妥善处置已经出让的闲置存量住宅用地，帮助企业解困。同时，促进土地节约集约利用，防范化解风险，助力房地产高质量发展。主要是两条线：一条线是严格依法处置闲置土地，另一条线是加大对存量土地盘活利用的支持力度。
5月27日	中共中央政治局	《防范化解金融风险问责规定(试行）》	金融监管	中共中央政治局5月27日召开会议，审议《新时代推动中部地区加快崛起的若干政策措施》《防范化解金融风险问责规定(试行）》。会议指出，防范化解金融风险，事关国家安全、发展全局、人民财产安全，是实现高质量发展必须跨越的重大关口。制定出台《防范化解金融风险问责规定(试行）》，就是要进一步推动在金融领域落实全面从严治党要求，切实加强党中央对金融工作的集中统一领导，进一步压实金融领域相关管理部门、金融机构、行业主管部门和地方党委政府的责任，督促各级领导干部树立正确的政绩观，落实好全面加强金融监管、防范化解金融风险、促进金融高质量发展各项任务。
