# Supplementary material
Source: ML conference proceedings conference paper supplement (https://openreview.net/forum?id=xg0fmtqh8d)
Supplement: supplementary_material [file 34_计算机行业周报:Meta推出开源Llama 3,关注国内AI产业技术进步.xlsx]

## Sheet: Sheet
投资建议的评级标准	类别	评级	说明
报告中投资建议所涉及的评级分为股票评级和行业评级（另有说明的除外）。评级标准为报告发布日后的6-12个月内公司股价（或行业指数）相对同期相关证券市场代表性指数的涨跌幅。其中：A股市场以沪深300指数为基准。	股票评级	买入	股票价格变动相对沪深300指数涨幅在10%以上
		增持	股票价格变动相对沪深300指数涨幅在5%至10%之间
		中性	股票价格变动相对沪深300指数涨跌幅在-5%至5%之间
		减持	股票价格变动相对沪深300指数跌幅在-10%至-5%之间
		卖出	股票价格变动相对沪深300指数跌幅在-10%以上
	行业评级	推荐	基本面向好，行业指数领先沪深300指数
		中性	基本面稳定，行业指数跟随沪深300指数
		回避	基本面向淡，行业指数落后沪深300指数
