# Supplementary material
Source: ML conference proceedings conference paper supplement (https://openreview.net/forum?id=xg0fmtqh8d)
Supplement: supplementary_material [file 35_汽车智能化板块动态追踪:计算机行业:“小鹏图灵”流片,华为引望智能上半年扭亏为盈.xlsx]

## Sheet: Sheet
报告类型	标题	日期
行业普通报告	计算机行业：地平线完成境外上市备案，享界S9 搭载华为端到端	2024-08-12
行业深度报告	计算机行业2024 年半年度展望：聚焦新质生产力，把握行业结构性机会	2024-07-31
行业普通报告	计算机行业：设计标及设备招标逐步落地，车路云一体化建设节奏符合预期	2024-07-29
行业普通报告	计算机行业：车路云政策有序推进，落地节奏逐步清晰	2024-07-04
行业深度报告	计算机行业：车路协同久久为功，蓄势待发	2024-06-14
行业深度报告	计算机行业：汽车智能化快速渗透，车路协同再迎催化	2024-06-05
行业普通报告	计算机行业：曙光初现，静待复苏—1-4 月行情回顾及23 年&24Q1 财报点评	2024-05-15
行业普通报告	计算机行业：算力规划持续落地，强调自主可控、绿色化、适度超前	2024-04-30
行业普通报告	计算机行业：人工智能或将成为新质生产力发展重要引擎	2024-03-06
行业普通报告	计算机行业：机构配置意愿较强、估值水平合理	2024-03-01
公司普通报告	中科曙光(603019.SH)：业绩稳健增长，算力建设稳步推进	2024-08-23
公司普通报告	金山办公(688111.SH)：业绩符合预期，AI 产品拓展顺利	2024-08-22
公司普通报告	中科曙光(603019.SH)：业绩符合预期，仍将受益算力基础设施建设	2024-04-19
公司普通报告	金山办公(688111.SH)：订阅业务增速亮眼，AI 赋能有望提升产品力	2024-03-22
