# Supplementary material
Source: ML conference proceedings conference paper supplement (https://openreview.net/forum?id=xg0fmtqh8d)
Supplement: supplementary_material [file 36_汽车和汽车零部件行业周报:享界S9上市智能驾驶奇点已至.xlsx]

## Sheet: Sheet
公司简称	公告时间	公告类型	公告摘要
福耀玻璃	2024/08/06	业绩报告	公司发布 2024 年半年报：上半年实现营收 183.4 亿元，同比+22.01%；归母净利润 34.99 亿元，同比+23.35%。
贝斯特	2024/08/07	业绩报告	公司发布 2024 年半年报：上半年实现营收 6.97 亿元，同比增长 10.06%；净利润1.44 亿元，同比增长 10.86%；发布 2024 中期现金分红方案：拟以总股本为基数，每 10 股派发现金红利人民币 0.3 元（含税）；发布为全资子公司提供担保的公告：拟为两家全资子公司提供担保，累计担保额度不超过 4 亿元。
金龙汽车	2024/08/09	业绩报告	公司发布 2024 年半年报：上半年营业收入 97.63 亿元，同比+4.19%；归母净利润6,639.61 万元，同比+41.7%；基本每股收益 0.09 元。
赛力斯	2024/08/09	收购控股子公司少数股东股权	公司发布收购控股子公司少数股东股权的公告：拟收购控股子公司赛力斯汽车少数股东持有的赛力斯汽车 19.36%股权，交易金额约为 13.29 亿元。
福田汽车	2024/08/09	产销快报	公司发布 7 月份产销数据快报：7 月产量为 40,970 辆，同比+5.72%；销量为38,361 辆，同比-4.38%。
广汽集团	2024/08/09	产销快报	公司发布 7 月份产销数据快报：7 月产量为 15.68 万辆，同比-9.14%；销量为14.12 万辆，同比-25.37%。
东风股份	2024/08/09	产销快报	公司发布 7 月份产销数据快报：7 月产量为 8,903 辆，同比-14.53%；销量为10,080 辆，同比-26.03%。
江淮汽车	2024/08/09	产销快报	公司发布 7 月份产销数据快报：7 月产量为 35,109 辆，同比+9.86%；销量为32,192 辆，同比-3.90%。
上汽集团	2024/08/09	产销快报	公司发布 7 月份产销数据快报：7 月整车产量为 23.75 万辆，同比-42.57%；销量为 25.15 万辆，同比-37.16%。
江铃汽车	2024/08/05	产销快报	公司发布 7 月份产销数据快报：7 月份生产量为 25,336 辆，同比+16.25%；7 月份销售量为 27,151 辆，同比+12.45%。
长安汽车	2024/08/05	产销快报	公司发布 7 月份产销数据快报：7 月份生产量为 145,298 辆，同比-34.12%；7 月份销售量为 170,631 辆，同比-17.86%。
金龙汽车	2024/08/06	产销快报	公司发布 7 月份产销数据快报：7 月份客车生产量为 3,510 辆，同比+9.41%；销售量为 2,792 辆，同比-8.79%。
安凯客车	2024/08/08	产销快报	公司发布 7 月份产销数据快报：7 月份客车生产量为 388 辆，同比+46.45%；销售量为 450 辆，同比+62.09%。
一汽解放	2024/08/08	产销快报	公司发布 7 月份产销数据快报：7 月份生产量为 11,286 辆，同比-15.33%；销售量为 16,435 辆，同比+30.94%。
亚太股份	2024/08/06	政府补助	公司发布获得政府财政补助的公告：公司自 2024 年 3 月 1 日至 2024 年 7 月 31日期间，累计收到各类政府补助合计 1044.12 万元，补助形式为现金补助。
立中集团	2024/08/08	政府补助	公司发布获得政府补助的公告：自 2023 年 12 月 20 日-2024 年 8 月 6 日共获得的政府补助累计为 6,090.79 万元，其中实际收到的政府补助为 5,937.32 万元，尚未收到的政府补助为 153.46 万元。
银轮股份	2024/08/05	定点通知	公司发布获得订单的公告：公司子公司浙江开山银轮近日与某数据中心整体解决方案服务商签订合同，将为客户提供 BTB 算力中心的液冷散热系统 108 套。
瑞鹄模具	2024/08/05	定点通知	公司发布在新加坡设立全资子公司的公告：公司已完成新加坡全资子公司的设立工作，注册资本 100 万美元，有利于公司未来拓展国际业务。
银轮股份	2024/08/07	定点通知	公司发布获得国际客户定点的公告：子公司近日收到某国际著名汽车制造商的定点意向书，公司获得该客户新能源卡车集成模块项目定点，预计将于 2027 年开始批量供货，项目达产后将为公司新增年销售收入约 1.2 亿元人民币。
玲珑轮胎	2024/08/08	定点通知	公司发布对外投资的公告：公司拟在境外（塞尔维亚）投资扩建项目，投资金额约为 6.45 亿美元（折 46.20 亿元人民币）；关于控股股东计划增持公司股份的公告：公司拟增持规模为不低于人民币 1.5 亿元不超过人民币 2 亿元股份。
春风动力	2024/08/06	员工持股计划	公司拟推 2025 年至 2026 年员工持股计划：计划拟参与不超 29 人，依据业绩提取奖励基金，资金规模不超过考核年度净利润的 5%；2024 年股票期权激励计划：拟授予激励对象的股票期权数量 355 万份，约占股本总额的 2.34%。首次授予股票期权 337.25 万份，激励对象共计 1310 人，行权价格为 106 元/份。
文灿集团	2024/08/06	子公司担保	公司发布为全资子公司提供担保的公告：公司为江苏文灿向南洋银行申请授信提供担保，担保金额为等值人民币 1 亿元。
威孚高科	2024/08/07	子公司增资	公司发布对境外两家全资子公司增资的公告：公司拟对其全资子公司 IRD 增资16,200 万丹麦克朗；拟对其全资子公司 Borit 增资 1,435 万欧元。
隆鑫通用	2024/08/07	控股股东重整进展	公司发布控股股东重整进展暨相关风险提示的公告：截至目前，隆鑫系公司重整管理人账户已收到重整投资人宗申新智造和渝富资本支付的首笔重整投资款 6.73 亿元和 4.23 亿元，现金债权已清偿金额为 21.04 亿元，占现金清偿债权总额的21.38%。
上汽集团	2024/08/08	权益分派	公司发布 2023 年度权益分派实施公告：公司每股分配现金红利 0.37 元，不送红股，不以资本公积金转增股本。
上声电子	2024/08/08	股东减持股份	公司持股 5%以上股东减持股份计划的公告：公司拟计划通过集中竞价及大宗交易方式合计减持不超过 600,012 股。
