# Supplementary material
Source: ML conference proceedings conference paper supplement (https://openreview.net/forum?id=xg0fmtqh8d)
Supplement: supplementary_material [file 37_汽车行业剖析:阿维塔入股引望,加速智能化落地,夯实高端化定位.xlsx]

## Sheet: Sheet
辆	2023年7月	2024年6月	2024年7月	同比	环比
比亞迪	261,105	340,211	340,799	30.5%	0.2%
理想汽车	34,134	47,774	51,000	49.4%	6.8%
华为ADS搭载车型	5,431	46,489	44,678	722.6%	-3.9%
埃安	45,025	35,027	35,238	-21.7%	0.6%
零跑	14,335	20,116	22,093	54.1%	9.8%
蔚来	20,463	21,209	20,498	0.2%	-3.4%
极氪	12,039	20,106	15,655	30.0%	-22.1%
小鹏	11,008	10,668	11,145	1.2%	4.5%
哪咤	10,039	10,206	11,015	9.7%	7.9%
小米		>10,000	>10000		n.a
岚图	3,412	4,522	6,015	76.3%	33.0%
合计	411,560	519,839	523,458	27.3%	0.7%
