# Supplementary material
Source: ML conference proceedings conference paper supplement (https://openreview.net/forum?id=xg0fmtqh8d)
Supplement: supplementary_material [file 38_计算机行业研究:BTC矿工出售额创半年新低,现货ETF转为净流出.xlsx]

## Sheet: Sheet
时间	事件
2024年5月1日	美国财政部的再融资公告将于5月1日发布，其中详细说明了三个月的借款需求和财政一般账户的余额。
2024年5月23日	VanEck对美国现货以太坊ETF申请的最终截至日期。
2024年5月29日	美国证券交易委员会（SEC）对Bitwise、Grayscale比特币ETF期权的决定期
