# Supplementary material
Source: ML conference proceedings conference paper supplement (https://openreview.net/forum?id=xg0fmtqh8d)
Supplement: supplementary_material [file 39_计算机周报:阿里完成三年整改的信号与机遇.xlsx]

## Sheet: Sheet
证券代码	证券简称	周涨跌幅(%)	收盘价(元)	周最低价(元)	周最高价(元)
300209.SZ	天泽信息	31.38%	4.48	3.65	4.78
300386.SZ	飞天诚信	26.86%	10.58	7.83	11.42
300561.SZ	汇金科技	21.02%	9.73	7.73	9.73
300047.SZ	天源迪科	20.33%	8.70	7.08	10.28
300287.SZ	飞利信	18.78%	2.72	2.16	2.72
