# Supplementary material
Source: ML conference proceedings conference paper supplement (https://openreview.net/forum?id=xg0fmtqh8d)
Supplement: supplementary_material [file 40_银行业2024年中报综述:中报边际变化不大,明年或迎业绩拐点.xlsx]

## Sheet: Sheet
		2023年末总资产同比	2024年二季度末总资产同比	2023年营业收入同比	2024年上半年营业收入同比	2023年归母净利润同比	2024年上半年归母净利润同比
600926.SH	杭州银行	13.9%	13.8%	6.3%	5.4%	23.2%	20.1%
601128.SH	常熟银行	16.2%	15.6%	12.1%	12.0%	19.6%	19.6%
601665.SH	齐鲁银行	19.5%	17.7%	8.0%	5.5%	18.0%	17.0%
600000.SH	浦发银行	3.5%	3.6%	-8.1%	-3.3%	-28.3%	16.6%
603323.SH	苏农银行	12.4%	9.2%	0.2%	8.6%	16.0%	15.6%
601528.SH	瑞丰银行	23.3%	10.8%	7.9%	14.9%	13.0%	15.4%
002948.SZ	青岛银行	14.8%	15.1%	7.1%	12.0%	15.1%	13.1%
002966.SZ	苏州银行	14.7%	13.7%	0.9%	1.9%	17.4%	12.1%
601838.SH	成都银行	18.9%	16.7%	7.2%	4.3%	16.2%	10.6%
002807.SZ	江阴银行	10.2%	6.1%	2.3%	5.5%	16.8%	10.5%
600919.SH	江苏银行	14.2%	14.5%	5.3%	7.2%	13.3%	10.1%
002839.SZ	张家港行	10.4%	8.2%	-5.9%	7.4%	6.2%	9.3%
601009.SH	南京银行	11.1%	11.7%	1.2%	7.9%	0.5%	8.5%
600908.SH	无锡银行	11.0%	10.1%	1.3%	6.5%	10.0%	8.2%
002958.SZ	青农商行	7.6%	2.2%	3.8%	4.8%	10.8%	7.2%
002142.SZ	宁波银行	14.6%	16.7%	6.4%	7.1%	10.7%	5.4%
601077.SH	渝农商行	6.6%	5.0%	-3.6%	-1.3%	6.1%	5.3%
601860.SH	紫金银行	10.2%	8.5%	-1.9%	8.1%	1.2%	4.6%
601963.SH	重庆银行	11.0%	10.9%	-1.9%	2.6%	1.3%	4.1%
601577.SH	长沙银行	12.7%	9.9%	8.5%	3.3%	9.6%	4.0%
601916.SH	浙商银行	19.9%	11.5%	4.3%	6.2%	10.5%	3.3%
600015.SH	华夏银行	9.1%	5.6%	-0.6%	1.5%	5.3%	2.9%
601169.SH	北京银行	10.6%	8.6%	0.7%	6.4%	3.5%	2.4%
601288.SH	农业银行	17.5%	10.4%	0.0%	0.3%	3.9%	2.0%
000001.SZ	平安银行	5.0%	4.6%	-8.4%	-13.0%	2.1%	1.9%
601818.SH	光大银行	7.5%	0.6%	-3.9%	-8.8%	-9.0%	1.7%
601229.SH	上海银行	7.2%	6.3%	-4.8%	-0.4%	1.2%	1.0%
601166.SH	兴业银行	9.6%	4.6%	-5.2%	1.8%	-15.6%	0.9%
601825.SH	沪农商行	8.6%	7.0%	3.1%	0.2%	10.6%	0.6%
600928.SH	西安银行	6.5%	5.3%	9.7%	5.8%	1.6%	0.3%
601988.SH	中国银行	12.2%	9.1%	6.4%	-0.7%	2.4%	-1.2%
600036.SH	招商银行	8.8%	7.8%	-1.6%	-3.1%	6.2%	-1.3%
601658.SH	邮储银行	11.8%	8.5%	2.3%	-0.1%	1.2%	-1.5%
001227.SZ	兰州银行	4.0%	2.0%	7.6%	-3.6%	7.6%	-1.5%
601998.SH	中信银行	5.9%	3.1%	-2.6%	2.7%	7.9%	-1.6%
601328.SH	交通银行	8.2%	2.6%	0.3%	-3.5%	0.7%	-1.6%
601939.SH	建设银行	10.8%	5.3%	-1.8%	-3.6%	2.4%	-1.8%
601398.SH	工商银行	12.8%	7.9%	-3.7%	-6.0%	0.8%	-1.9%
600016.SH	民生银行	5.8%	-1.2%	-1.2%	-6.2%	1.6%	-5.5%
601997.SH	贵阳银行	6.5%	6.6%	-3.5%	-4.0%	-8.9%	-7.1%
601187.SH	厦门银行	5.2%	12.9%	-5.0%	-2.2%	6.3%	-15.0%
002936.SZ	郑州银行	6.6%	4.7%	-9.5%	-7.6%	-23.6%	-22.1%
