# Supplementary material
Source: ML conference proceedings conference paper supplement (https://openreview.net/forum?id=xg0fmtqh8d)
Supplement: supplementary_material [file 42_计算机“智能驾驶”系列专题一:萝卜快跑订单激增,Robotaxi商业化奇点到来.xlsx]

## Sheet: Sheet
重点公司代码	股票名称	2024/07/17股价	EPS			PE			投资评级
			2023	2024E	2025E	2023	2024E	2025E
002920.SZ	德赛西威	103.00	2.79	3.78	4.89	36.96	27.24	21.08	未评级
688326.SH	经纬恒润	69.01	-1.81	0.48	2.26	-	145.20	30.60	未评级
002373.SZ	千方科技	9.04	0.34	0.41	0.52	26.34	21.93	17.38	未评级
301221.SZ	光庭信息	37.07	-0.17	0.46	0.59	-	80.16	62.64	未评级
002829.SZ	星网宇达	17.91	0.26	0.80	1.05	68.95	22.29	17.07	未评级
300496.SZ	中科创达	45.82	1.01	1.41	1.82	45.13	32.52	25.20	未评级
002906.SZ	华阳集团	28.70	0.89	1.23	1.61	32.39	23.42	17.81	未评级
002405.SZ	四维图新	6.52	-0.55	-0.27	-0.14	-	-	-	未评级
688631.SH	莱斯信息	53.36	0.81	0.98	1.21	66.03	54.18	44.05	增持
300698.SZ	万马科技	33.29	0.48	0.76	1.19	69.21	44.01	28.04	未评级
002230.SZ	科大讯飞	38.92	0.28	0.36	0.57	136.88	108.40	67.90	买入
