# Supplementary material
Source: ML conference proceedings conference paper supplement (https://openreview.net/forum?id=xg0fmtqh8d)
Supplement: supplementary_material [file 43_银行行业点评:政策“组合拳”逐渐明朗,继续看好板块估值修复.xlsx]

## Sheet: Sheet
		原存款准备金率	调整后存款准备金率	释放流动性(亿元)	息差贡献(BP)	利润贡献率
大行	工商银行	8.50%	8.00%	1,681	0.6	0.5%
	建设银行	8.50%	8.00%	1,414	0.6	0.5%
	农业银行	8.50%	8.00%	1,450	0.6	0.6%
	中国银行	8.50%	8.00%	1,166	0.6	0.6%
	交通银行	8.50%	8.00%	425	0.6	0.6%
	邮储银行	8.50%	8.00%	743	0.9	1.1%
股份行	招商银行	6.50%	6.00%	433	0.8	0.4%
	中信银行	6.50%	6.00%	276	0.7	0.6%
	浦发银行	6.50%	6.00%	250	0.6	0.9%
	民生银行	6.50%	6.00%	203	0.6	0.8%
	兴业银行	6.50%	6.00%	269	0.6	0.5%
	光大银行	6.50%	6.00%	192	0.7	0.8%
	平安银行	6.50%	6.00%	179	0.8	0.7%
	浙商银行	6.50%	6.00%	95	0.8	1.0%
城商行	北京银行	7.50%	7.00%	117	0.6	0.6%
	江苏银行	7.50%	7.00%	105	0.8	0.6%
	上海银行	7.50%	7.00%	88	0.5	0.4%
	南京银行	6.50%	6.00%	71	0.9	0.7%
	宁波银行	6.50%	6.00%	92	0.9	0.6%
	杭州银行	6.50%	6.00%	58	0.7	0.5%
	成都银行	7.50%	7.00%	42	0.8	0.5%
	长沙银行	6.50%	6.00%	34	1.0	0.9%
	重庆银行	6.50%	6.00%	22	0.7	0.8%
	厦门银行	6.50%	6.00%	10	0.5	0.5%
	齐鲁银行	6.50%	6.00%	21	0.8	0.6%
	青岛银行	5.50%	5.00%	21	0.9	0.8%
	苏州银行	5.00%	5.00%	0	0.0	0.0%
上市银行		7.93%	7.43%	9,456	0.6	0.6%
大行		8.50%	8.00%	6,879	0.6	0.6%
股份行		6.50%	6.00%	1,897	0.7	0.6%
城商行		6.89%	6.39%	680	0.7	0.6%
