# Supplementary material
Source: ML conference proceedings conference paper supplement (https://openreview.net/forum?id=xg0fmtqh8d)
Supplement: supplementary_material [file 44_麻醉药品量价深度研究:场景不止手术室内,品种不止仿制跟随.xlsx]

## Sheet: Sheet
药物	类别	是否进入国采	备注
七氟烷	吸入麻醉	否	7家企业拥有生产批文
地氟烷	吸入麻醉	否	公司独家品种
右美托咪定	静脉麻醉药	是
丙泊酚中/长链脂肪乳注射液	静脉麻醉药	是
甲苯磺酸瑞马唑仑	静脉麻醉药	否	公司独案品科
布比卡因	局部麻醉药	是
罗哌卡因	局部麻醉药	是
顺阿曲库铵	肌检药	是
布托啡诺	镇癌药	否	恒瑞医药、福安药业、国瑞药业拥有生产批文
艾司氯胺酮	特癌药	否	公司独家品种
