# Supplementary material
Source: ML conference proceedings conference paper supplement (https://openreview.net/forum?id=xg0fmtqh8d)
Supplement: supplementary_material [file 45_上市银行2024年中报综述:利润增速边际改善,红利价值依旧显著.xlsx]

## Sheet: Sheet
		2023/03	2023/06	2023/09	2023/12	2024/03	2024/06	较2024Q1变化
国有行	工商银行	0.02%	1.21%	1.07%	0.97%	-2.78%	-1.89%	0.90%
	建设银行	0.26%	3.36%	3.30%	2.71%	-2.17%	-1.80%	0.37%
	农业银行	1.75%	3.48%	4.99%	3.94%	-1.63%	1.99%	3.63%
	中国银行	0.50%	0.78%	1.03%	1.96%	-2.90%	-1.24%	1.66%
	交通银行	5.63%	4.51%	1.89%	0.63%	1.44%	-1.63%	-3.07%
	邮储银行	5.22%	5.20%	2.45%	1.23%	-1.35%	-1.51%	-0.16%
股份行	招商银行	7.82%	9.12%	6.52%	6.22%	-1.96%	-1.33%	0.63%
	中信银行	10.34%	10.89%	9.19%	7.91%	0.25%	-1.60%	-1.85%
	浦发银行	-18.35%	-23.32%	-30.83%	-28.28%	10.04%	16.64%	6.60%
	民生银行	3.70%	-3.49%	-0.60%	1.57%	-5.63%	-5.48%	0.15%
	兴业银行	-8.93%	-4.92%	-9.53%	-15.61%	-3.10%	0.86%	3.97%
	光大银行	5.34%	3.32%	3.00%	-8.96%	0.39%	1.72%	1.34%
	华夏银行		5.07%	5.15%	5.30%	0.61%	2.86%	2.24%
	平安银行	4.05%	14.94%	8.12%	2.06%	2.26%	1.94%	-0.32%
	浙商银行	13.63% 9.91%	11.03%	10.54%	10.50%	5.12%	3.31%	-1.81%
城商行	北京银行	1.90%	4.89%	4.50%	3.49%	4.95%	2.39%	-2.56%
	南京银行	8.22%	5.26%	2.09%	0.51%	5.14%	8.51%	3.37%
	宁波银行	15.35%	14.90%	12.55%	10.66%	6.29%	5.42%	-0.87%
	江苏银行	24.83%	27.20%	25.21%	13.25%	10.02%	10.05%	0.03%
	贵阳银行	1.07%	-2.29%	-2.93%	-8.92%	-3.65%	-7.08%	-3.44%
	杭州银行	28.11%	26.29%	26.06%	23.15%	21.11%	20.06%	-1.05%
	上海银行	3.25%	1.27%	1.03%	1.19%	1.77%	1.04%	-0.73%
	成都银行	17.50%	25.10%	20.81%	16.22%	12.83%	10.60%	-2.23%
	长沙银行	8.68%	10.61%	9.21%	9.57%	5.75%	4.01%	-1.74%
	青岛银行	15.83%	15.72%	15.17%	15.11%	18.74%	13.07%	-5.68%
	郑州银行	1.86%	-19.14%	-19.18%	-23.62%	-18.57%	-22.12%	-3.55%
	西安银行	8.20%	8.60%	7.10%	1.56%	3.79%	0.31%	-3.48%
	苏州银行	20.84%	21.00%	21.36%	17.41%	12.29%	12.10%	-0.19%
	厦门银行	14.98%	15.92%	14.63%	6.30%	4.35%	-15.03%	-19.38%
	齐鲁银行	12.33%	15.49%	16.22%	18.02%	15.98%	16.98%	0.99%
	重庆银行	2.69%	4.38%	0.68%	1.27%	4.04%	4.12%	0.09%
农商行	江阴银行	12.78%	14.23%	15.15%	16.83%	12.72%	10.50%	-2.22%
	常熟银行	20.60%	20.82%	21.10%	19.60%	19.80%	19.58%	-0.22%
	苏农银行	15.96%	15.29%	15.81%	16.04%	15.83%	15.64%	-0.19%
	张家港行	17.42%	13.65%	10.22%	6.24%	7.08%	9.29%	2.21%
	青农商行	5.58%	8.17%	8.84%	10.82%	10.14%	7.21%	-2.92%
	紫金银行	5.50%	5.70%	5.80%	1.16%	5.40%	4.62%	-0.78%
	渝农商行	9.18%	9.52%	7.72%	6.10%	-10.81%	5.33%	16.13%
