# Supplementary material
Source: ML conference proceedings conference paper supplement (https://openreview.net/forum?id=xg0fmtqh8d)
Supplement: supplementary_material [file 46_银行6月社融符合预期,金融总量目标淡化.xlsx]

## Sheet: Sheet
类别	评级	评级说明
公司评级	买入	未来6个月内，个股相对市场基准指数指数涨幅在20%以上
	持有	未来6个月内，个股相对市场基准指数指数涨幅介于10%与20%之间
	中性	未来6个月内，个股相对市场基准指数涨幅介于-10%与10%之间
	回避	未来6个月内，个股相对市场基准指数涨幅介于-20%与-10%之间
	卖出	未来6个月内，个股相对市场基准指数涨幅在-20%以下
行业评级	强于大市	未来6个月内，行业整体回报高于市场基准指数5%以上
	跟随大市	未来6个月内，行业整体回报介于市场基准指数-5%与5%之间
	弱于大市	未来6个月内，行业整体回报低于市场基准指数-5%以下
