# Supplementary material
Source: ML conference proceedings conference paper supplement (https://openreview.net/forum?id=xg0fmtqh8d)
Supplement: supplementary_material [file 47_计算机行业:电子信息制造业稳增长行动方案发布,有望促进先进计算、智能汽车等相关产业发展.xlsx]

## Sheet: Sheet
平安证券研究所计算机团队
分析师	闫磊	YANLEI511@pingan.com.cn	投资咨询	S1060517070006
	黄韦涵	HUANGWEIHAN235@pingan.com.cn	投资咨询	S1060523070003
研究助理	王佳一	WANGJIAYI446@pingan.com.cn	一般证券从业资格	S1060123070023
