# Supplementary material
Source: ML conference proceedings conference paper supplement (https://openreview.net/forum?id=xg0fmtqh8d)
Supplement: supplementary_material [file 48_银行业基本面最新跟踪:信贷投放、资产质量与地产新政落地.xlsx]

## Sheet: Sheet
	活期	3个月	6个月	1年期	2年期	3年期
调低挂牌利率（2022.9.15，六大行、招行等股份行：三年期定存和大额存单利率下调15bp，一年期和五年期定存利率下调10bp，活期存款利率下调5bp，部分中小行跟进）
活期及整存整取定存（挂牌利率）
六大行及招行	0.25%	1.25%	1.45%	1.65%	2.15%	2.6%-2.65%
部分股份及中小银行	0.25%	1.30%	1.55%	1.85%	2.2%-2.4%	2.65%
基准利率	0.35%	1.10%	1.30%	1.50%	2.10%	2.75%
调低挂牌利率（2023.6.8，大行调整挂牌利率，活期降5bp，2年期降10bp，3年期和5年期降15bp，其他存款挂牌利率不变。股份行、中小行分别陆续跟进）
活期及整存整取定存（挂牌利率）
六大行及招行	0.20%	1.25%	1.45%	1.65%	2.05%	2.45%
部分股份及主要中小银行	0.2%-0.25%	1.3%-1.4%	1.55%-1.7%	1.85%-2%	2.1%-2.5%	2.5%-2.8%
基准利率	0.35%	1.10%	1.30%	1.50%	2.10%	2.75%
调低挂牌利率（2023.9.1，大行下调定期存款挂牌利率，其中，一年期下调10个基点，二年期下调20个基点，三年期、五年期定期存款挂牌利率下调25个基点。随后股份行及中小行陆续跟进。
活期及整存整取定存（挂牌利率）
六大行及招行	0.20%	1.25%	1.45%	1.55%	1.85%	2.20%
部分股份及中小银行	0.2%-0.25%	1.3%-1.4%	1.55%-1.7%	1.75%-2%	1.9%-2.45%	2.25%-2.8%
基准利率	0.35%	1.10%	1.30%	1.50%	2.10%	2.75%
调低挂牌利率（财新社电，自2023.12.22起，国有大行将于12月22日下调存款挂牌利率，其中1年及以内、2年、3年、5年期的定期存款挂牌利率分别下调10BP、20BP、25BP、25BP。预计随后股份行及中小行会陆续跟进。
活期及整存整取定存（挂牌利率）
六大行及招行	0.25%	1.15%	1.35%	1.55%	1.65%	1.95%
部分股份及中小银行	0.2%-0.25%	1.2%-1.4%	1.45%-1.7%	1.65%-2%	1.7%-2.4%	2%-2.7%
基准利率	0.35%	1.10%	1.30%	1.50%	2.10%	2.75%
