# Supplementary material
Source: ML conference proceedings conference paper supplement (https://openreview.net/forum?id=xg0fmtqh8d)
Supplement: supplementary_material [file 49_工业软件行业跟踪:科远智慧中报超预期.xlsx]

## Sheet: Sheet
证券代码	证券简称	收盘价(元)	周涨跌幅(%)	周换手率(%)	市盈率PE(TTM)倍	总市值 (亿元)	24Q1营业总收入同比增长率(%)	24Q1归母净利润同比增长率(%)	24Q1ROE(摊薄,%)
600406.SH	国电南瑞	24.35	-1.14	1.71	26.97	1,955.99	24.25	13.69	1.25
600845.SH	宝信软件	30.72	-0.78	1.77	33.51	748.90	34.44	18.19	4.93
301269.SZ	华大九天	71.66	-1.74	3.86	207.79	389.07	33.59	-63.75	0.16
688188.SH	柏楚电子	163.36	-9.43	2.68	42.46	335.63	40.31	46.55	3.7
600588.SH	用友网络	9.19	-1.61	3.94	-30.70	314.16	18.61	-14.17	-4.7
688777.SH	中控技术	36.75	-1.21	5.38	25.14	290.29	20.25	57.39	1.46
002063.SZ	远光软件	5.32	2.12	6.43	29.33	101.35	0.84	16.47	0.27
301095.SZ	广立微	39.97	1.06	12.56	78.47	79.94	100.65	-667.92	-0.71
688083.SH	中望软件	56.67	-8.76	4.72	128.58	68.74	3.84	-44.94	-0.97
300687.SZ	赛意信息	13.23	-1.56	11.02	18.56	54.26	4.51	216.45	0.76
688206.SH	概伦电子	14.03	-0.57	10.80	-65.94	60.86	27.97	-7,285.90	-1.81
603859.SH	能科科技	17.97	-5.07	14.40	19.00	44.18	30.37	30.22	2.01
301162.SZ	国能日新	39.57	2.25	14.09	45.98	39.63	25.75	18.71	1.13
688507.SH	索辰科技	43.87	-3.52	6.46	70.16	39.09	346.22	-9	-0.75
002380.SZ	科远智慧	19.67	8.49	25.08	24.40	47.21	30.08	322.18	2.13
300378.SZ	鼎捷软件	15.46	-2.28	10.25	27.56	41.67	13.27	8.73	-0.47
002184.SZ	海得控制	8.41	-4.32	8.73	34.82	29.60	-21.61	-161.41	-0.9
300996.SZ	普联软件	15.27	-2.05	42.89	36.78	30.93	43.1	117.54	0.27
688109.SH	品茗科技	27.20	-0.33	3.85	130.64	21.45	-1.02	29.04	-1.27
300508.SZ	维宏股份	19.71	4.95	17.25	66.28	21.50	4.83	-31.47	2.16
688768.SH	容知日新	22.54	0.81	4.48	29.13	18.40	6.32	2.29	-2.46
