# Supplementary material
Source: ML conference proceedings conference paper supplement (https://openreview.net/forum?id=xg0fmtqh8d)
Supplement: supplementary_material [file 51_计算机:中泰科技:工信部明确2027年改造目标,国产工业软件迎发展良机.xlsx]

## Sheet: Sheet
更新领域	细分方向	具体更新内容
工业软件	基础软件	重点更新工业领域应用的操作系统、数据库、中间件等产品。
	工业软件	重点更新计算机辅助设计(CAD)、计算机辅助工程(CAE)、计算机辅助制造(CAM)、制造执行系统(MES)、企业资源计划(ERP)等软件。
	工业操作系统	重点更新可编程逻辑控制器(PLC)、分布式控制系统(DCS)、数据采集与监视控制系统(SCADA)、安全仪表系统(SIS)、嵌入式软件等产品。
工业网络设备	工业设备网络化升级	利用工业总线、工业以太网、5G等技术，加快工业现场设备的网络化智能化改造升级。
	工业网络改造升级	运用工业光网络(PON)、TSN、5G、Wi-Fi6等技术升级企业网络基础设施，部署新型工业路由器、交换机、网关等设备。
	工业数据集成能力提升	采用信息模型、标识解析等技术，全面提升工业数据采集、存储、管理和应用的能力。
	工业操作系统改造升级	按需部署内嵌5G、TSN等先进通信模组的融合工业装备，实现传统工业操作系统的IP化、智能化和无线化改造。
	边缘计算能力提升	部署边缘计算节点、边缘计算网关、边缘控制器、边缘云等工业算力设备，建设工业智算中心，支撑工业人工智能等应用部署。
	工业设备网络化升级	利用工业总线、工业以太网、5G等技术，加快工业现场设备的网络化智能化改造升级。
