# Supplementary material
Source: ML conference proceedings conference paper supplement (https://openreview.net/forum?id=xg0fmtqh8d)
Supplement: supplementary_material [file 52_汽车行业动态研究报告:新势力7月销量点评:零跑交付量创历史新高,理想、鸿蒙智行稳居中国高端新势力品牌前二.xlsx]

## Sheet: Sheet
公司代码	名称	2024-08-05股价	EPS			PE			投资评级
			2023	2024E	2025E	2023	2024E	2025E
000700.SZ	模塑科技	5.50	0.63	0.77	0.93	8.73	7.14	5.91	买入
002906.SZ	华阳集团	24.16	0.94	1.22	1.60	30.03	23.20	17.70	未评级
300100.SZ	双林股份	12.22	0.20	0.75	0.99	61.10	16.29	12.34	买入
300258.SZ	精锻科技	7.59	0.56	0.67	0.85	13.55	11.33	8.93	买入
301215.SZ	中汽股份	5.34	0.12	0.18	0.29	47.58	31.76	19.78	未评级
301307.SZ	美利信	18.42	0.70	0.74	0.87	31.89	30.13	25.69	未评级
600418.SH	江淮汽车	18.20	0.07	0.12	0.27	260.00	151.67	67.41	买入
600933.SH	爱柯迪	12.87	1.02	1.15	1.48	12.62	11.19	8.70	买入
601127.SH	赛力斯	75.07	-1.62	2.95	3.22	-46.34	25.45	23.31	买入
601965.SH	中国汽研	16.28	0.84	0.97	1.16	21.23	18.40	15.38	未评级
603179.SH	新泉股份	38.67	1.65	2.28	3.05	23.44	16.96	12.68	买入
603197.SH	保隆科技	30.13	1.82	2.39	3.18	18.82	14.35	10.79	未评级
603348.SH	文灿股份	22.55	0.19	1.50	2.18	151.79	19.25	13.26	未评级
603596.SH	伯特利	37.78	2.15	1.94	2.54	18.60	20.59	15.75	未评级
603730.SH	岱美股份	8.51	0.51	0.54	0.65	19.80	18.75	15.66	未评级
605133.SH	嵘泰股份	15.93	0.78	1.20	1.77	20.42	13.28	9.00	买入
832978.BJ	开特股份	9.07	0.59	0.76	0.96	15.37	11.93	9.45	买入
833533.BJ	骏创科技	11.04	0.88	1.18	1.58	12.55	9.36	6.99	买入
