# Supplementary material
Source: ML conference proceedings conference paper supplement (https://openreview.net/forum?id=xg0fmtqh8d)
Supplement: supplementary_material [file 53_医药生物:GLP-1制剂篇:GLP-1有望成就新一代药王,国内市场开启减重时代.xlsx]

## Sheet: Sheet
通用名	剂型	创新类型	药品类别一	适应症	靶点	集团	本企业进度
重组甘精胰岛素+利司那肽	注射剂	创新药	生物制品	II型糖尿病(原研)	insulin;GLP-1R	赛诺菲	已上市
德谷胰岛素+利拉鲁肽	注射剂	创新药	生物制品	II型糖尿病(原研)	insulin;GLP-1R	诺和诺德	已上市
insulinicodec+司美格鲁肽	注射剂	创新药	生物制品	糖尿病	insulin;GLP-1R	诺和诺德	PhaseIII
Cagrilintide+司美格鲁肽	注射剂	创新药	生物制品	肥胖	amylin;GLP-1R	诺和诺德	PhaseIII
Cagrilintide+司美格鲁肽	注射剂	创新药	生物制品	II型糖尿病	amylin;GLP-1R	诺和诺德	PhaseIII
HR17031	注射剂	创新药	生物制品	II型糖尿病	insulin;GLP-1R	恒瑞医药	PhaseIII
维派那肽+PB-722	注射剂	创新药	化学药品	肥胖	GLP-1R;GCGR	派格生物医药(苏州)股份有限公司	PhaseI
德谷胰岛素+利拉鲁肽	注射剂	生物类似物	生物制品	II型糖尿病	insulin;GLP-1R	通化东宝	PhaseI
德谷胰岛素+利拉鲁肽	注射剂	生物类似物	生物制品	II型糖尿病	insulin;GLP-1R	联邦制药	PhaseI
德谷胰岛素+利拉鲁肽	注射剂	生物类似物	生物制品	II型糖尿病	insulin;GLP-1R	四环医药	批准临床
德谷胰岛素+利拉鲁肽	注射剂	生物类似物	生物制品	II型糖尿病	insulin;GLP-1R	东阳光药	批准临床
