# Supplementary material
Source: ML conference proceedings conference paper supplement (https://openreview.net/forum?id=xg0fmtqh8d)
Supplement: supplementary_material [file 54_重卡行业7月跟踪月报:总量符合预期,天然气及新能源表现亮眼.xlsx]

## Sheet: Sheet
		24M1	24M2	24M3	24M4	24M5	24M6	24M7	24M8E	24Q1	24Q2	24M1-7
批发销量/万辆		9.7	6.0	11.6	8.2	7.8	7.1	5.8	6.0	27.3	23.2	56.3
	Yoy	99.1%	-22.2%	0.3%	-1.0%	0.9%	-17.5%	-5.0%	-15.7%	13.0%	-6.2%	2.3%
	环比	86.2%	-38.1%	92.9%	-28.9%	-5.0%	-8.7%	-18.3%	2.9%
终端销量/万辆		3.4	2.6	7.5	6.5	5.4	4.7	4.6	4.5	13.5	16.6	34.8
	Yoy	20.3%	-55.8%	-1.7%	17.0%	6.1%	-4.3%	8.6%	-14.0%	-17.3%	6.7%	-3.8%
	环比	-5.6%	-23.5%	189.0%	-13.7%	-17.3%	-12.3%	-1.3%	-3.1%
出口销量/万辆		2.6	2.4	2.5	2.5	2.8	2.4	2.2	2.3	7.5	7.7	17.3
	Yoy	38.6%	6.4%	4.1%	6.7%	17.5%	-7.4%	-12.9%	0.2%	14.8%	5.4%	6.0%
	环比	34.2%	-7.7%	2.5%	3.4%	11.4%	-16.5%	-8.7%	6.5%
渠道库存		3.70	1.00	1.60	-0.80	-0.39	0.06	-0.97	-0.80	6.30	-1.12	1.97
