# Supplementary material
Source: ML conference proceedings conference paper supplement (https://openreview.net/forum?id=xg0fmtqh8d)
Supplement: supplementary_material [file 55_计算机行业:持续看好计算机行业投资机会,关注信创、AI、金融IT三大板块.xlsx]

## Sheet: Sheet
涨幅前10位				涨幅末10位
序号	股票简称	涨幅%	换手率%	序号	股票简称	涨幅%	换手率%
1	C合合	95.99	63.51	1	ST证通	4.87	7.59
2	志晟信息	30.00	20.76	2	*ST龙宇	4.87	4.90
3	国子软件	30.00	32.08	3	ST智知	5.00	2.07
4	华信永道	30.00	7.55	4	ST英飞拓	5.06	7.72
5	曙光数创	29.98	3.98	5	纳思达	7.17	2.91
6	立方控股	29.97	49.53	6	国网信通	7.36	2.63
7	同辉信息	29.97	21.46	7	淳中科技	7.52	9.52
8	艾融软件	29.97	15.53	8	大华股份	7.69	6.61
9	国源科技	29.94	12.84	9	*ST有树	8.16	7.01
10	广道数字	29.94	18.62	10	魅视科技	8.19	17.30
