# Supplementary material
Source: ML conference proceedings conference paper supplement (https://openreview.net/forum?id=xg0fmtqh8d)
Supplement: supplementary_material [file 56_北交所&新兴成长行业周报:禾赛获ISO 21448预期功能安全流程认证,新豪华智享C级轿车领克Z10正式上市.xlsx]

## Sheet: Sheet
重点公司	股票	2024/9/6	EPS			PE			投资
代码	名称	股价	2023A	2024E	2025E	2023A	2024E	2025E	评级
688167.SH	炬光科技	41.93	1.00	1.66	2.79	41.85	25.26	15.03	买入
688048.SH	长光华芯	24.50	-0.52	0.89	1.41	-	27.53	17.38	增持
603297.SH	永新光学	55.60	2.12	2.77	3.53	26.26	20.07	15.75	买入
300627.SZ	华测导航	28.92	0.83	1.14	1.49	35.01	25.37	19.41	买入
688326.SH	经纬恒润	61.67	-1.82	-2.42	1.91	-	-	32.29	增持
300680.SZ	隆盛科技	15.93	0.64	1.28	1.82	25.07	12.45	8.75	买入
