# Supplementary material
Source: ML conference proceedings conference paper supplement (https://openreview.net/forum?id=xg0fmtqh8d)
Supplement: supplementary_material [file 60_人工智能大模型医学应用研究_郭华源.xlsx]

## Sheet: Sheet
名称	发表时间	主要功能
ClinicalBERT[41]	2019.7	研制面向临床的BERT模型, 用于一般临床文本和出院总结的自然语言文本分析, 该特定领域模型可提高NLP处理性能
BioBERT[29]	2020.4	基于大规模生物医学语料库, 进行预先训练的特定领域语言表示模型, 使用NLP技术从生物医学文献中提取有价值信息
BioNLP[50]	2020.11	针对18个生物医学和临床NLP任务, 从开源生物医学和临床NLP模型中, 挑选适合不同环境的模型, 并分析各种预训练设计对模型下游性能的影响
BioMegatron[51]	2020.11	实证评估影响领域语言应用性能的因素, 包括子词词汇集、模型大小、预训练语料库和领域迁移等, 提高在生物医学领域进行预先训练的语言模型性能
ScholarBERT[52]	2022.5	将14个基于Transformer的模型应用于11项科学任务, 评估训练数据、模型大小、预训练时间、微调长度等因素如何影响下游性能, 是迄今规模最大、种类最多的科学语言模型
BioGPT[53]	2022.10	由于BERT和GPT模型(含变种)在下游生物医学任务中缺乏生成能力, 现对大规模生物医学文献进行预先训练, 研制特定领域生成式Transformer语言模型
PaLM[48]	2022.12	通过调整模型量表和指令提示, 提高理解、知识回忆和医学推理等能力, 突显评估框架和开发方法对大规模语言模型(PaLM及变体Flan-PaLM, Med-PaLM)的重要支撑
ChatDoctor[54]	2023.4	通过使用在线医疗咨询网站10万余次真实世界的医患对话数据, 对大语言模型进行微调, 显著提升模型在患者需求理解、知情建议提供以及用户响应准确性等方面性能
