# Supplementary material
Source: ML conference proceedings conference paper supplement (https://openreview.net/forum?id=xg0fmtqh8d)
Supplement: supplementary_material [file 61_基于大语言模型的复杂任务自主规划处理框架.xlsx]

## Sheet: Sheet
方法	规模 (B)	评价指标(%)
		TSR	TCR	PT	ST
不进行规划	1.8	7.99	30.30	39.23	34.50
	14	37.37	90.00	60.57	48.99
	72	39.24	76.40	68.33	60.04
TPTU	1.8	0.60	18.80	33.07	24.92
	14	36.13	87.30	60.19	48.30
	72	39.84	76.80	68.14	59.96
CTP	1.8	7.27	30.20	39.23	34.50
	14	37.54	89.90	60.63	49.02
	72	39.48	76.90	68.01	59.82
人工规划	1.8	8.17	43.38	39.24	34.50
	14	47.70	92.05	83.54	72.21
	72	61.69	97.60	86.78	80.75
