# Supplementary material
Source: ML conference proceedings conference paper supplement (https://openreview.net/forum?id=xg0fmtqh8d)
Supplement: supplementary_material [file 62_美国对俄罗斯金融制裁的法律机制与法律挑战_李姝娟.xlsx]

## Sheet: Sheet
	2014年克里米亚危机	2022年俄乌冲突
对特定地区的全面制裁	克里米亚地区	顿涅茨克与卢甘斯克地区
对实体和个人的封锁式制裁	SDN清单制裁	SDN清单制裁
对行业、实体和个人的非封锁式制裁	行业制裁(SSI)	代理或汇通账户制裁(CAPTA)菜单式制裁(NS－MSB)
金融基础设施制裁	—	SWIFT制裁
