# Supplementary material
Source: ML conference proceedings conference paper supplement (https://openreview.net/forum?id=xg0fmtqh8d)
Supplement: supplementary_material [file 63_图模互补:知识图谱与大模型融合综述_NormalPdf.xlsx]

## Sheet: Sheet
类别	名称	年份	原理
构建预训练语料库	KELM 语料库[17]	2020	大模型作为生成器
	KGTEXT 语料库[18]	2020	大模型作为生成器
	ANALOGYKB 语料库[87]	2023	大模型作为生成器
知识图谱内嵌大模型	K-BERT[89]	2020	知识注入大模型
	KnowBERT[90]	2019	知识注入大模型
	ERNIE[91]	2019	模块化内嵌大模型
	ERNIE 3. 0[92]	2019	知识图谱训练大模型
	SKILL[93]	2022	知识图谱训练大模型
	KLMo[94]	2021	知识图谱与大模型链接表示
	KEPLER[95]	2019	实体嵌入大模型
	Lu 等[96]	2022	知识注入大模型
	KnowGPT[97]	2023	知识注入大模型
	Fang 等[98]	2023	知识图谱训练大模型
增强大模型推理	JointLK[104]	2021	图神经网络+知识图谱
	QA-GNN[105]	2021	图神经网络+知识图谱
	DRAGON[107]	2022	知识图谱训练大模型
增强大模型检索	LaMDA[39]	2022	知识图谱训练大模型
	RAG[108]	2020	知识图谱作为大模型的检索文档
	RETRO[109]	2021	知识图谱作为大模型的检索文档
	KaLMA[110]	2023	知识图谱作为大模型的检索文档
	KMLM[111]	2021	知识图谱训练大模型
增强大模型可解释性	LMExplainer[112]	2023	知识图谱作为检索器
	XplainLLM[114]	2023	将大模型推理与知识图谱关联
