# Supplementary material
Source: ML conference proceedings conference paper supplement (https://openreview.net/forum?id=xg0fmtqh8d)
Supplement: supplementary_material [file 64_社会大众如何看待生成式人工...幕文本的舆情主题与情感分析_王冲.xlsx]

## Sheet: Sheet
时期阶段	主题编号	主题词描述	特征关键词
探索期(1-3月)	A1	认知程度	听说过、没用过、没听说过、不会用、用不了、想知道、怎么用……
	A2	使用感受	答案、合理、荒谬、细思极恐、瞎写、胡编乱造、真实信息、省力……
	A3	科研写作	自然完整、文本润色、辅助、写论文、抄袭、没有反制手段、chatgpt、逻辑能力……
	A4	教育应用	中学老师、基础教育、无法促进、鼓励、禁止使用、传统教育、挑战、独立思考……
	A5	态度观点	工具、人性、剽窃、人类、意识、解放、收费、不是智慧、淘汰、进化、可怕、惧怕……
波动期(4-8月)	B1	教育公平	农村、孩子、怎么办、进厂、读书、要钱、没钱、房贷、车贷、钞能力……
	B2	能力要求	解决问题、能力、会提问、筛选、好大学、聪明程度……
	B3	思维水平	复杂性思维、培养、创造力、自我意识、批判性思维、学会思考、思维独特……
	B4	教育应用	应付、应试、写文章、糊弄、回答、模式化、家长、教师、矛盾体、学校……
	B5	态度观点	人类、清除、躺平、废话、贩卖焦虑、反感、假大空、卖课……
稳定期(9-12月)	C1	教师教学	以身作则、教学大纲、引导学习、老师、专业、辅导、失业、虚拟形象……
	C2	学生学习	学会分享、效果好、有帮助、补习班、考试、错误答案……
	C3	未来发展	ai、自学、作文、满分、培养、好习惯、知识、填鸭、会思考、方法……
	C4	教育应用	gpt、效率工具、流浪汉、人均大学、国内、用不了、中文网站、大模型……
	C5	态度观点	资源整合、人性、判断、数据侵权、法律、无所不能、收获很大、太强了、不够精确……
