# Supplementary material
Source: ML conference proceedings conference paper supplement (https://openreview.net/forum?id=xg0fmtqh8d)
Supplement: supplementary_material [file 65_人工智能大模型医学应用研究_郭华源.xlsx]

## Sheet: Sheet
大模型名称	模型层数	隐含状态数	多头注意力	参数总量(亿)	主要特点
CLIP	12	512	8	0.63	Transformer采用小写的字节对编码(BPE)表示
MengZi	12	768	12	1.03	采用轻量化的Transformer
GPT	12	768	12	1.1	采用有标注自注意力机制的解码Transformer
BERT-BASE	12	768	12	1.1	采用双向Transformer
BERT-LARGE	24	1024	16	3.4	采用双向Transformer
GPT-2	48	1600	32	15	采用多层单向Transformer(解码端), 多任务预训练
CogView	48	2560	40	40	采用单向Transformer
Megatron-LM	72	3072	32	83	基于PyTorch Transformer的神经语言模型
DALL-E	64	3968	62	120	采用自回归Transformer
T5	48	1024	128	110	使用标准Encoder-Decoder Transformer模型
CPM-2	24	10240	64	110	基于双向编码器、单向解码器的Transformer架构
M6	24	1024	16	1000	由自关注Transformer和逐点式前馈网络(FFN)组成
CPM-2-MoE	24	10240	64	1980	基于双向编码器、单向解码器的Transformer架构
