# Supplementary material
Source: ML conference proceedings conference paper supplement (https://openreview.net/forum?id=xg0fmtqh8d)
Supplement: supplementary_material [file 66_AI绘画研究综述_张泽宇.xlsx]

## Sheet: Sheet
评价方法	原理	优点	缺点	适用范围	类型
PSNR	基于均方误差 (MSE) 方法。值越大，则生成图像越接近真实图像	简单易用，可以直观地反映生成图像与真实图像之间的差异程度	忽略了人类对图像感知的非线性特性，不能很好地反映生成图像的视觉质量	衡量一些需要保持原始信息不变或者只有微小变化的生成任务，比如去噪、超分辨率等	Q
SSIM	基于结构相似性。值越接近1，则生成图像越接近真实图像	考虑了人类对图像感知的结构特性，可以更好地反映生成图像的视觉质量	忽略了人类对图像感知的高阶特征，如纹理、边缘等	衡量一些需要保持结构信息不变或者只有微小变化的生成任务，比如去模糊、去雾等	Q
bits/ dimension	根据模型对每个像素的概率分布来计算。值越低，生成图越接近真实图	是一种无参考的评价方法，不需要额外的数据集或标准来进行比较	只能评价模型对图像的整体质量，不能反映出图像的局部细节或语义信息	适用于评价基于最大似然估计的图像生成模型	Q
IS	基于Inception 网络。值越大，生成图像越清晰且多样	简单易用，可以同时反映生成图像的质量和多样性	依赖于Inception网络的结构和参数，不能很好地适应不同领域或任务的数据集	衡量一些需要产生清晰且多样的图像的生成任务，比如GAN等	QD
FID	基于Inception 网络。值越小，生成图像越接近真实图像	不依赖于网络输出类别，可以更好地适应不同领域或任务数据集	计算复杂度较高，需要计算特征空间中的均值和协方差矩阵	衡量一些需要产生逼真且多样的图像的生成任务，比如GAN等	Q
LPIPS	基于深度学习网络。值越小，则生成图像越接近真实图像	考虑了人类对图像感知的高阶特征，可以更好地反映生成图像的视觉质量	需要训练权重参数，且对不同数据集或任务可能需要不同的权重参数	衡量一些需要产生高质量且多样的图像的生成任务，比如超分辨率、风格迁移等	QD
