# Supplementary material
Source: ML conference proceedings conference paper supplement (https://openreview.net/forum?id=xg0fmtqh8d)
Supplement: supplementary_material [file 67_以色列对国内阿拉伯人的政策及其成因.xlsx]

## Sheet: Sheet
	男	女
非哈瑞迪犹太人①	12676	9065
阿拉伯穆斯林	11414	7294
阿拉伯基督徒	11756	7560
德鲁兹人	12009	6617
贝都因人	10686	7909
