# Supplementary material
Source: ML conference proceedings conference paper supplement (https://openreview.net/forum?id=xg0fmtqh8d)
Supplement: supplementary_material [file 68_历史叙事在国家对外政策行为中的运用逻辑——以俄乌冲突引发的叙事争议为例.xlsx]

## Sheet: Sheet
	叙事主题	叙事模板	模板应用
俄罗斯	俄罗斯遭遇外敌入侵，被迫发起反击	最初俄罗斯未受到外敌侵扰。某个外敌无缘无故攻击俄罗斯。俄罗斯遭遇生存威胁，被迫反抗，最终赶走敌人，赢得胜利。	2014年，乌克兰政府侵犯克里米亚俄罗斯人和俄语居民的权利，俄罗斯被迫介入克里米亚冲突。2022年，北约东扩、乌克兰当局反俄行动威胁了俄罗斯国家安全和俄罗斯人的利益，俄罗斯被迫对乌克兰发起军事行动。
乌克兰	乌克兰是遭遇侵略的受害者	最初乌克兰人未遭遇外敌威胁。某个外敌对乌克兰领土实施侵略、瓜分及殖民统治，试图同化乌克兰民族，消除其民族特性。乌克兰人建立主权国家的尝试遭遇侵略者的阻碍。	2014年俄罗斯对克里米亚实施“武装侵略”，试图同化乌克兰人，使乌克兰人成为俄罗斯民族一部分。2022年俄罗斯对乌克兰发动“全面入侵战争”，试图消除乌克兰民族特性，攫取乌克兰国家主权和领土。
