# Supplementary material
Source: ML conference proceedings conference paper supplement (https://openreview.net/forum?id=xg0fmtqh8d)
Supplement: supplementary_material [file 69_中等强国合作体:机制成因、功能属性及行为趋向.xlsx]

## Sheet: Sheet
合作形式强弱程度(强)		合作形式强弱程度(弱)
A1B1	世界卫生组织、联合国粮农组织、国际原子能机构、核供应国集团	A1B2	不结盟运动、七十七国集团
A2B1	东南亚国家联盟、非洲联盟、海湾阿拉伯国家合作委员会、南亚区域合作联盟	A2B2	中等强国合作体
