# Supplementary material
Source: ML conference proceedings conference paper supplement (https://openreview.net/forum?id=xg0fmtqh8d)
Supplement: supplementary_material [file 70_数字主权愿景下的欧盟数字治理改革.xlsx]

## Sheet: Sheet
	1993年	1999年	2003年	2010年
	«马斯特里赫特条约»	«阿姆斯特丹条约»	«尼斯条约»	«里斯本条约»
对外政策
政治对外关系	1.5	2.0	2.0	2.5
经济对外关系	3.5	3.5	3.5	3.5
内部政策
刑事/国内安全	1.0	2.0	3.0	4.0
民事	3.0	3.5	4.0	4.0
经济和货币联盟
宏观经济与就业	1.5	3.5	3.5	3.5
货币政策	4.0	5.0	5.0	5.0
税收	1.5	1.5	1.5	1.5
监管政策
经济自由	4.5	4.5	4.5	4.5
竞争与产业	3.0	3.0	4.0	4.0
环境/消费者保护	3.75	3.75	3.75	3.75
职业健康与安全标准	4.0	4.5	4.5	4.5
能源与交通	2.0	2.0	2.0	4.0
劳工	3.5	4.0	4.0	4.0
开支政策
文化	1.0	1.0	1.0	4.5
