# Supplementary material
Source: ML conference proceedings conference paper supplement (https://openreview.net/forum?id=xg0fmtqh8d)
Supplement: supplementary_material [file 71_基于知识编辑的大模型内容生成安全分析.xlsx]

## Sheet: Sheet
基座模型	方法	成功率/%↑	泛化性/%↑	流畅性/%↑	是非观/%↑	局部性/%↑
GPT-J-6B	None	41.02	40.86	4.72	13.09	100.00
	FT	36.71(−4.31)	35.03(−5.83)	4.34(−0.39)	12.89(−0.20)	99.55(−0.45)
	SERAC	91.91(50.89)	80.61(39.75)	6.55(1.83)	48.81(35.72)	100(0.00)
	MEND	95.93(54.91)	74.24(33.38)	2.56(−2.17)	6.90(−6.19)	96.08(−3.92)
	Ext-Sub	55.47(14.45)	59.94(19.08)	4.23(−0.50)	15.56(2.47)	97.71(−2.29)
	IKE	36.47(−4.55)	25.78(−15.08)	5.11(−0.39)	12.33(−0.76)	78.66(−21.34)
LLaMA2-7B	None	33.68	34.16	7.44	40.42	100.00
	FT	77.66(43.98)	57.70(23.54)	6.58(−0.86)	39.78(−0.64)	96.93(−3.07)
	SERAC	99.60(65.92)	98.56(50.65)	5.37(−2.08)	31.05(−9.37)	100(0.00)
	MEND	99.04(65.36)	89.31(41.40)	6.42(−1.02)	21.71(−18.71)	98.30(−1.70)
	Ext-Sub	67.92(34.24)	68.56(20.65)	7.95(−0.16)	45.17(4.75)	98.65(−1.35)
	IKE	38.31(4.63)	33.84(−14.07)	7.41(−0.03)	41.90(1.48)	84.77(−15.23)
LLaMA2-7B-Chat	None	44.53	48.44	6.57	84.32	100
	FT	79.89(35.36)	58.70(10.26)	7.18(0.61)	85.24(0.92)	96.00(−4.00)
	SERAC	99.60(55.07)	98.56(50.65)	5.37(−1.21)	31.05(−53.27)	100(0.00)
	MEND	94.41(49.88)	75.42(27.51)	6.94(0.37)	76.94(−7.38)	97.99(−2.01)
	Ext-Sub	61.29(16.76)	62.17(14.26)	7.53(0.96)	84.78(0.46)	97.92(−2.08)
	IKE	67.83(23.30)	49.32(1.41)	8.24(1.67)	85.67(1.35)	84.77(−15.23)
LLaMA2-13B-Chat	None	47.91	50.43	7.39	81.79	100.00
	FT	75.96(28.05)	58.07(7.64)	7.44(0.05)	82.91(1.12)	96.71(−3.29)
	SERAC	99.60(51.69)	98.56(48.13)	5.37(−2.02)	31.05(−50.74)	100.00(0.00)
	MEND	85.63(37.72)	60.26(9.83)	7.25(−0.14)	81.17(−0.62)	98.75(−1.25)
	Ext-Sub	73.18(25.27)	73.02(22.59)	7.52(0.14)	81.92(0.13)	99.08(−0.92)
	IKE	57.04(9.13)	43.60(−6.83)	8.75(1.37)	51.84(−29.95)	77.10(−22.90)
