# Supplementary material
Source: ML conference proceedings conference paper supplement (https://openreview.net/forum?id=xg0fmtqh8d)
Supplement: supplementary_material [file 72_文化认同理论视域下中国对非洲跨文化传播的实践探索.xlsx]

## Sheet: Sheet
媒体	肯尼亚	尼日利亚	南非
中国国际电视台(CGTN)	6.5	11	2.6
英国广播公司(BBC)	40	50	35
美国有线电视新闻网(CNN)	40	50	38
中国国际广播电台(CRI)	1.8	1.2	0.5
英国广播公司(BBC)	18	16	5
美国之音(VOA)	8	10	2
«中国日报»	1.8	2.8	1.2
«纽约时报»	10	12	8
«华盛顿邮报»	8	7	4
