# Supplementary material
Source: ML conference proceedings conference paper supplement (https://openreview.net/forum?id=xg0fmtqh8d)
Supplement: supplementary_material [file 73_以色列工党社会民主主义意识形态的右倾嬗变及其影响.xlsx]

## Sheet: Sheet
时间	得票率(%)	时间	得票率(%)
1949年1月	11.5	1961年8月	13.8
1951年7月	6.6	1965年11月	21.3
1955年7月	12.6	1969年10月	21.7
1959年11月	13.5	1973年12月	30.2
