# Supplementary material
Source: ML conference proceedings conference paper supplement (https://openreview.net/forum?id=xg0fmtqh8d)
Supplement: supplementary_material [file 74_冲突层级与国际非政府组织参与冲突调停的效力分析.xlsx]

## Sheet: Sheet
	模型1（底层冲突）	模型2（底层冲突）	模型3（底层冲突）	模型4（底层冲突）	模型5（顶层冲突）	模型6（顶层冲突）
国际非政府组织	0.48** (0.18)	0.48** (0.18)	0.28 (0.20)	0.42* (0.18)	0.16 (0.28)	-0.74 (0.51)
中央政府	-0.12 (0.14)		-0.24 (0.15)
冲突烈度	0.01 (0.03)	0.01 (0.03)	0.01 (0.03)	0.00 (0.03)	-0.01 (0.03)	-0.01 (0.03)
政体类型	1.40 (0.73)	1.43 (0.74)	1.60* (0.74)	1.42 (0.74)	0.51 (0.78)	0.66 (0.79)
公民社会发达程度	0.13 (0.08)	0.14 (0.08)	0.12 (0.08)	0.14 (0.08)	0.29** (0.10)	0.31** (0.10)
社会包容度	-1.76** (0.56)	-1.80** (0.56)	-1.85** (0.57)	-1.82** (0.56)	-2.26*** (0.56)	-2.38*** (0.57)
外国政府		0.12 (0.19)		0.05 (0.20)	0.18 (0.14)	0.08 (0.15)
国际非政府组织：中央政府			1.01* (0.45)
国际非政府组织：外国政府				0.86 (0.73)		1.45* (0.61)
观测值	1496	1496	1496	1496	921	921
