# Supplementary material
Source: ML conference proceedings conference paper supplement (https://openreview.net/forum?id=xg0fmtqh8d)
Supplement: supplementary_material [file 75_关系网络视角下主要经济体对WTO改革的立场探析.xlsx]

## Sheet: Sheet
案例	访问	代理	身份
欧盟(1992—2006年)	高	低	融合型改革者
欧盟(2006年至今)	高	高	桥接型改革者
美国(1986—1994年)	高	低	融合型改革者
美国(1996年至今)	高	高	桥接型改革者
中国(2001—2020年)	高	低	融合型改革者
中国(2020年至今)	高	高	桥接型改革者
印度(1995年至今)	低	低	异见型改革者
巴西(1996—2019年)	高	低	融合型改革者
