# Supplementary material
Source: ML conference proceedings conference paper supplement (https://openreview.net/forum?id=xg0fmtqh8d)
Supplement: supplementary_material [file 76_图模互补:知识图谱与大模型融合综述_NormalPdf.xlsx]

## Sheet: Sheet
类别	名称	年份	原理
增强图谱构建	ChatIE[63]	2023	通过提示工程抽取信息
	ChatExtract[64]	2023	通过提示工程提取提示问题集
	AutoKG[65]	2023	通过预训练大模型提取关键词
	Tang 等[66]	2023	利用ChatGPT 生成标注样本
增强图谱补全	Yao 等[67]	2023	知识图谱内嵌大模型
	KoPA[70]	2023	知识图谱内嵌大模型
	KICGPT[68]	2024	大模型作为额外知识库
	Li 等[69]	2024	大模型作为训练数据生成器
增强图谱推理	LLM-ARK[72]	2023	大模型引导知识图谱推理
	LARK[73]	2023	大模型引导知识图谱推理
	ChatRule[74]	2023	大模型作为规则生成器
增强图谱问答	Taffa 等[80]	2023	通过提示工程生成SPARQL 查询
	ChatKBQA[81]	2023	微调大模型生成SPARQL 查询
	KnowPAT[82]	2023	微调知识偏好的大模型
	BYOKG[83]	2023	大模型作为补充语料库
