# Supplementary material
Source: ML conference proceedings conference paper supplement (https://openreview.net/forum?id=xg0fmtqh8d)
Supplement: supplementary_material [file 77_AI绘画研究综述_张泽宇.xlsx]

## Sheet: Sheet
数据集	数据集介绍	模型	模型参数量/10 6	FID 得分	IS 得分
MS-COCO	是由微软开发维护的大型图像数据集, 具有非常高的行业地位且规模非常庞大。数据集共包含123 287 幅图像, 包含80 000 张用于训练的图像和40 000 张用于测试的图像。其中每个图像包含5 个句子注释	Re-Imagen [77]	≈1 200	5.25	—
		TLDM [78]	—	6.29	—
		ERNIE-ViLG 2.0 [76]	≈2 400	6.75	—
		Imagen [74]	≈1 500	7.27	—
		DALL-E [62]	≈1 500	27.50	17.90
		DALL-E2 [68]	≈350	10.39	—
		GLIDE [73]	—	12.24	—
		Stable Diffusion [75]	≈600	12.63	—
CUB-200-2011	该数据集是精细视觉分类任务中使用最广泛的数据集。它包含属于鸟类的200 个子类别的11 788 张图像, 其中5 994 张用于训练, 5 794 张用于测试。每张图像都具有1 个子类别标签、 15 个部分位置信息、312 个二进制 属性和1 个边界框	TLDM	—	6.72	—
		Swinv2-Imagen [79]	≈3 000	9.78	8.44
		StackGAN++ [58]	≈138.3	15.30	3.82
		GAWWN [55]	≈41.7	67.22	3.62
		MirrorGAN [61]	≈175.8	—	4.56
		AttnGAN [60]	≈86.7	—	4.36
Multi-Modal- CelebA-HQ	是一个大规模人脸图像数据集, 具有30 000 张高分辨率人脸图像, 每个图像都对应10 个描述性文本, 还有高质量的分割蒙版、 素描和透明背景图像	Swinv2-Imagen	≈3 000	10.31	—
		TediGAN-B [80]	≈41.7	101.42	—
		TediGAN-A [81]	≈175.8	106.37	—
