# Supplementary material
Source: ML conference proceedings conference paper supplement (https://openreview.net/forum?id=xg0fmtqh8d)
Supplement: supplementary_material [file 78_美国对拉美经济战略的调整及其影响.xlsx]

## Sheet: Sheet
国家/地区	GDP	出口	进口	贸易	EV/GDP
中国	0.018	0.069	-0.099	-0.008	-0.044
美国	0.135	6.530	1.778	3.030	0.020
巴西	2.527	3.952	10.051	5.766	-0.811
墨西哥	2.963	5.220	9.821	7.453	1.896
秘鲁	-0.426	14.360	7.938	12.288	3.257
智利	-0.466	8.689	7.460	8.265	3.138
欧盟	0.080	0.171	-0.082	0.046	-0.042
日本	-0.113	0.005	-0.244	-0.110	-0.013
韩国	-1.153	1.330	16.092	7.511	5.137
加拿大	1.828	4.292	6.936	5.531	0.469
印度	-0.109	0.357	-0.283	0.022	-0.033
印度尼西亚	-0.265	0.184	-0.264	0.023	0.195
澳大利亚	0.003	-0.310	-0.058	-0.216	-0.026
马来西亚	-0.384	0.418	-0.166	0.200	-0.007
新西兰	-0.004	2.634	-0.041	1.560	-0.029
菲律宾	-0.010	1.907	0.057	1.080	0.051
泰国	-0.173	0.755	-0.134	0.394	0.011
俄罗斯	0.411	1.557	0.328	1.247	-0.225
新加坡	0.030	0.814	-0.026	0.480	-0.083
越南	0.214	2.111	0.196	1.289	0.028
巴林	-0.057	0.226	-0.168	0.071	-0.356
文莱	-0.006	-0.435	0.016	-0.327	0.084
科威特	-0.007	-0.518	-0.125	-0.450	-0.121
卡塔尔	-0.007	4.652	-0.098	4.046	-0.057
沙特阿拉伯	-3.28E-06	1.876	-0.149	1.361	-0.066
其他地区	0.391	0.709	0.411	0.555	0.167
世界	0.206	1.451	1.451	1.451	0.085
