# Supplementary material
Source: ML conference proceedings conference paper supplement (https://openreview.net/forum?id=xg0fmtqh8d)
Supplement: supplementary_material [file 79_复合制度主义:基于中阿合作论坛的实证研究.xlsx]

## Sheet: Sheet
合作机制或项目名称	发起方	阿拉伯国家等参与方	合作议题	与中阿合作论坛的制度竞争程度
中阿合作论坛	中阿	阿盟成员国	政治、经贸、人文	/
欧盟—阿盟峰会	欧盟	阿盟成员国	政治、经贸、人文	中
美阿峰会	美国	海合会、埃及、约旦和伊拉克	政治、经贸	高
内盖夫论坛	美国	以色列、美国的阿拉伯盟国	安全	低
中东版四国机制	美国	印度、以色列、阿联酋	政治、经贸	高
西亚基建联盟	美国	印度、沙特、阿联酋	经贸	高
叙利亚问题四国协调机制	俄罗斯	土耳其、伊朗、叙利亚	政治、安全	低
亚非增长走廊(AAGC)	日本	所有阿拉伯国家	经贸、基建	高
全球门户(GlobalGateway)	欧盟	所有阿拉伯国家	经贸、基建	高
蓝点网络(BlueDotNetwork)	美、日本、澳大利亚	所有阿拉伯国家	网络、科技	高
重建更美好世界(B3W)及全球基础设施与投资伙伴(PGII)	西方七国集团	全体阿拉伯国家	经贸、基建、科技	高
印度—中东—欧洲经济走廊	美国、沙特、阿联酋、印度	印度、沙特、阿联酋、约旦、以色列、意大利、法国、德国和欧盟	基建、运输、经贸等	高
欧佩克＋	沙特	俄罗斯、阿联酋、科威特等	能源	低
伊斯兰合作组织	沙特	全体阿拉伯国家、伊朗、土耳其等	政治、宗教	低
东地中海天然气论坛	埃及	以色列、黎巴嫩、希腊、塞浦路斯等	能源	低
海湾海军联盟	伊朗	沙特、阿联酋等	军事、政治	低
