# Supplementary material
Source: ML conference proceedings conference paper supplement (https://openreview.net/forum?id=xg0fmtqh8d)
Supplement: supplementary_material [file 80_经济特区的政治逻辑——以俄罗斯利佩茨克特区为例_费海汀.xlsx]

## Sheet: Sheet
企业	目标层次	掌握财富	支配财富	扩大财富
	最优	自主	完全	垄断
	次优	部分	部分	盈利
	最差	失去	失去	生存
