# Supplementary material
Source: ML conference proceedings conference paper supplement (https://openreview.net/forum?id=xg0fmtqh8d)
Supplement: supplementary_material [file 81_以色列基础教育数字化转型中的数字鸿沟及其治理.xlsx]

## Sheet: Sheet
年级	2011年		差额	2018年		差额
	阿拉伯学生	犹太学生		阿拉伯学生	犹太学生
1~6年级	13192	14862	1670	16523	17529	1006
7~9年级	15300	18495	3195	20578	22459	1881
10~12年级	16819	24084	7265	24759	34301	9542
