# Supplementary material
Source: ML conference proceedings conference paper supplement (https://openreview.net/forum?id=xg0fmtqh8d)
Supplement: supplementary_material [file 82_美国对拉美经济战略的调整及其影响.xlsx]

## Sheet: Sheet
国家/地区	GDP	出口	进口	贸易	EV/GDP
中国	-2.945	-5.836	-5.858	-5.846	-0.366
美国	-0.373	4.458	-2.884	-0.950	0.015
巴西	4.211	0.764	8.818	3.160	-1.749
墨西哥	2.225	5.821	6.697	6.246	1.371
秘鲁	-0.678	13.233	4.062	10.274	2.727
智利	-0.548	7.247	3.004	5.784	2.106
欧盟	-0.339	-0.210	-0.319	-0.264	0.035
日本	-0.054	-1.150	0.271	-0.492	0.104
韩国	-0.967	-0.396	16.663	6.746	5.368
加拿大	1.399	4.481	7.088	5.702	0.882
印度	0.675	-1.146	1.132	0.046	-0.027
印度尼西亚	2.859	-3.577	2.855	-1.262	-2.031
澳大利亚	-0.034	-2.169	0.431	-1.196	0.188
马来西亚	2.022	-2.643	0.788	-1.361	-0.210
新西兰	0.019	1.239	0.370	0.890	0.242
菲律宾	0.004	1.129	0.102	0.670	0.132
泰国	1.861	-2.089	1.142	-0.779	-0.569
俄罗斯	1.666	-0.821	2.405	-0.007	-0.564
新加坡	1.220	-1.217	0.692	-0.458	0.042
越南	1.641	-0.207	1.175	0.386	0.387
巴林	0.013	-0.473	0.089	-0.252	0.210
文莱	0.222	-0.687	0.741	-0.345	1.399
科威特	0.030	-1.685	0.437	-1.316	0.447
卡塔尔	0.012	4.090	0.380	3.617	0.212
沙特阿拉伯	-3.34E-06	1.016	0.369	0.852	0.142
其他地区	-0.202	0.070	-0.232	-0.086	0.263
世界	-0.440	-0.468	-0.468	-0.468	-0.012
