# Supplementary material
Source: ML conference proceedings conference paper supplement (https://openreview.net/forum?id=xg0fmtqh8d)
Supplement: supplementary_material [file 83_德国综合安全观:理论缘起、历史演进与实践评估.xlsx]

## Sheet: Sheet
状态	向乌克兰提供军事援助	加强联邦国防军建设	增强北约与欧盟防务
已完成	突破不向冲突地区提供武器原则
	与跨大西洋盟友协调
	向乌克兰提供装甲步兵战车、作战坦克、现代火炮与防空系统
进展中	为交付F-16战机提供支援		利用并扩展欧盟军事援助手段
	摆脱军事上“克制文化”束缚
刚开始	扩大弹药生产规模	加快采购流程	增加北约东境部署
	装备乌克兰部队	缩小指挥部，扩大部队规模	加强欧洲防空能力
		加快执行“特别基金”
未有进展	向乌方提供远射程武器	减少官僚主义	增强欧盟在安全政策上的行动力
		提高军工生产效率
	为军事援助制定明确政治目标	切合实际地规划军队人员与军事能力	德国在联盟内承担军事领导角色
		将国防预算永久提升至国内生产总值的2%
	为乌克兰提供安全保障	参加更多实战演习	重拾中东欧国家对德国的信任与信心
