# Supplementary material
Source: ML conference proceedings conference paper supplement (https://openreview.net/forum?id=xg0fmtqh8d)
Supplement: supplementary_material [file 84_以退为进_欧洲右翼民粹政党的“去激进化”趋向.xlsx]

## Sheet: Sheet
	1997年	2002年	2007年	2011年	2014年	2015年
国民联盟支持率(%)	13	11	12	16	23	21
领导人支持率(%)	15	13	13	23	27	26
对民主构成威胁(%)	75	70	60	56	50	54
赞同国民联盟的主张(%)	20	28	26	22	34	33
