# Supplementary material
Source: ML conference proceedings conference paper supplement (https://openreview.net/forum?id=xg0fmtqh8d)
Supplement: supplementary_material [file 85_印尼与海合会成员国外交关系的新发展及其动因.xlsx]

## Sheet: Sheet
	沙特	巴林	科威特	阿联酋	卡塔尔
2011 年	110,908	879	4,164	4,720	4,501
2012 年	92,667	981	4,738	6,154	1,265
2013 年	121,890	1,176	7,919	9,891	1,332
2014 年	151,454	1,608	9,281	12,054	1,648
2015 年	164,643	1,685	8,306	10,315	1,595
2016 年	197,681	2,243	6,368	9,016	1,856
2017 年	182,086	2,457	5,760	8,387	1,859
2018 年	165,912	2,324	5,551	7,100	2,104
2019 年	157,512	2,631	5,762	9,065	1,989
2020 年	31,906	373	846	1,093	225
2021 年	2,053	35	75	384	43
2022 年	47,472	894	2,216	5,456	840
