# Supplementary material
Source: ML conference proceedings conference paper supplement (https://openreview.net/forum?id=xg0fmtqh8d)
Supplement: supplementary_material [file 86_美欧制裁对俄罗斯经济增长的影响——基于合成控制双重差分的两阶段对比分析_徐坡岭.xlsx]

## Sheet: Sheet
	2011	2012	2013	2014	2015	2016	2017
国民账户
名义GDP(万亿卢布)	601	681	730	790	831	856	918
名义GDP(10亿美元)	2048	2192	2294	2081	1370	1280	1575
实际GDP(同比，%)	4.3	4.0	1.8	0.7	-2.0	0.2	1.8
居民实际消费(同比，%)	6.8	7.6	5.1	2.1	-9.5	-2.6	3.7
实际固定资产投资(同比，%)	9.1	6.2	1.9	-2.1	-10.6	1.3	4.7
财政余额/ GDP(%)	0.7	-0.1	-0.4	0.8	-2.4	-3.4	-1.4
社会领域
失业率(%)	6.6	5.7	5.5	5.2	5.6	5.5	5.2
平均工资(千卢布)	234	266	298	325	340	367	391
储蓄率(占可支配收入的%)	8.0	6.7	4.9	3.1	10.2	9.9	7.7
国际收支(亿美元)
商品出口	5154	5274	5218	4968	3414	2817	3529
商品进口	3186	3358	3413	3079	1930	1915	2384
经常账户余额	1969	1917	1806	1889	1484	902	1146
国际直接投资	551	506	692	220	69	325	286
	2018	2019	2020	2021	2022	2023∗	2024∗
国民账户
名义GDP(万亿卢布)	1039	1096	1077	1353	1534	1670	1800
名义GDP(10亿美元)	1661	1693	1496	1837	2275	1940	2000
实际GDP(同比，%)	2.8	2.2	-2.	5.6	-2.1	3.5	1.7
居民实际消费(同比，%)	4.3	3.8	-5.9	10.0	-1.4	5.0	2.0
实际固定资产投资(同比，%)	0.6	10	-4.0	9.1	3.3	10.0	2.0
财政余额/ GDP(%)	2.6	18	-3.8	0.4	-2.1	-2.0	-0.2
社会领域
失业率(%)	4.8	4.8	5.8	4.9	3.9	3.2	3.0
平均工资(千卢布)	434	468	513	561	642	730	793
储蓄率(占可支配收入的%)	4.9	4.6	10.7	5.0	8.6	8.0	8.0
国际收支(亿美元)
商品出口	4439	4197	3335	4943	5883	4600	5250
商品进口	2489	2539	2401	3040	2804	3100	3250
经常账户余额	1951	1658	934	1903	3080	1500	2000
国际直接投资	88	320	95	404	-	-	-
