# Supplementary material
Source: ML conference proceedings conference paper supplement (https://openreview.net/forum?id=xg0fmtqh8d)
Supplement: supplementary_material [file 87_中等强国合作体:机制成因、功能属性及行为趋向.xlsx]

## Sheet: Sheet
特征属性	传统中等强国	新兴中等强国	复合中等强国
体系权力集散的关系	单极主导/不平衡两极	两极对峙/相对平衡两极	多极博弈/不平衡多极
	聚合⟵⟶ 流散
角色定位	追随者/低姿态	博弈者/高姿态	协调者/有限高姿态
结构布局	环形(特定议题象限内自成闭合回路系统)	星型(轮毂—辐轴合作)	网状(双多边交织相互合作)
政策路径	选择性结盟	制衡性结盟	灵活性结盟
规则模式	“条”式合作	“块”式合作	“条块”结合
	正式⟵⟶ 非正式
