# Supplementary material
Source: ML conference proceedings conference paper supplement (https://openreview.net/forum?id=xg0fmtqh8d)
Supplement: supplementary_material [file 88_德国综合安全观:理论缘起、历史演进与实践评估.xlsx]

## Sheet: Sheet
分类	欧洲主义安全观	冷战期间的德国安全观	冷战结束后的德国安全观	克里米亚危机后的德国安全观
安全定义	安全是社会建构与认知结果。	联邦德国安全威胁主要来自苏联。安全主要是军事威慑。	安全是社会建构产物。重视非传统安全，而非大国战争。	战争回归欧陆。安全既是防止爆发战争，也涉及维护秩序稳定。
安全领域	安全涉及军事、经济、科技、环保等。安全有内传外溢的效应。	军事与政治领域为主。包括军事威慑、国土防御与重获政治主权。	经济、社会风险以及非对称性威胁。如金融危机、非法移民、恐袭、区域/国际冲突。安全事务外溢效应明显。	安全不仅是本土与联盟防御，还要维护德国与欧盟经济“韧性”。
安全指涉对象	从国家行为体延伸至社会与个人，突破国家安全中心主义。	国家行为体为主。联邦德国核心关切是防止冷战升级为热战。	国家与社会行为体。统筹各界资源应对区域不稳定与国际危机。	国家与社会行为体。安全政策融合并重“防御性”与“韧性”，注重社会与人权标准。
安全化路径	安全专家在安全议程上博弈，影响社会安全认知。	安全议程“美主德从”，重点是应对苏联威胁，国家利益让位于西方联盟利益。	德美安全叙事与联盟异化明显。德国安全议程重视欧洲战略自主。	德国安全专家在安全议程上争夺话语权。安全是政治叙事与社会认知的互动产物。
