# Supplementary material
Source: ML conference proceedings conference paper supplement (https://openreview.net/forum?id=xg0fmtqh8d)
Supplement: supplementary_material [file 89_冲突层级与国际非政府组织参与冲突调停的效力分析.xlsx]

## Sheet: Sheet
	模型1 (底层冲突)	模型2 (顶层冲突)	模型3 (底层冲突)
国际非政府组织	0.48** (0.18)	0.17 (0.28)	0.52** (0.18)
冲突烈度	0.01 (0.03)	-0.00 (0.03)	0.00 (0.03)
政体类型	1.41 (0.73)	0.47 (0.78)	1.23 (0.74)
公民社会发达程度	0.13 (0.08)	0.30** (0.10)	0.12 (0.08)
社会开放程度	-1.80** (0.56)	-2.33*** (0.56)	-1.60** (0.57)
本土非政府组织			-0.49* (0.23)
观测值	1496	921	1496
