# Supplementary material
Source: ML conference proceedings conference paper supplement (https://openreview.net/forum?id=xg0fmtqh8d)
Supplement: supplementary_material [file 90_多模态知识图谱融合技术研究综述_陈囿任.xlsx]

## Sheet: Sheet
MMKG	MMKG类型	KG的来源	图片来源	质量控制方式	规模	每个实体对应图片的个数
Medical KG[9]	A-MMKG	EMR, ICD9/10,SIDER等	影像	通过实际专业医疗数据集构成	约2×10^7个实体	—
百度知识图谱	A-MMKG	互联网资源	search engine	通过百度百科搜索引擎对知识更新	动态更新	动态更新
ImageGraph[10]	A-MMKG	FB15K	search engine	通过维基百科URI消除歧义	约1.5×10^4个实体	55.8
MMKG [11]	A-MMKG	FB15K,DBpedia15K, YAGO15K	search engine	使用跨模态方式对不同KG实体对齐; 通过维基百科 URI进行消歧义处理	约1.5×10^4个实体	55.8
IMGpedia [12]	B-MMKG	DBpedia	Wikimedia Commons	通过DBpedia Commons构建	1.27×107个KG链接（有2.6 × 106 个 DBpedia 实体/概念），3×109个三元组（包括4.43×106个视觉关系三元组）	>5.6
VisualSem [13]	B-MMKG	BabelNet	Wikipedia, ImageNet	将ImageNet中的 synsets作为初始实体库使用挖掘邻域技术；使用图像-文本匹配模型对噪声过滤	约 8.99×104实体/概念，13种关系	10.4
Richpedia [14]	B-MMKG	Wikidata	search engine, Wikipedia	通过维基百科 URI 进行消歧处理；使用一个多样性检索模型对图像过滤	约 280 万个实体/概念，1.72亿个三联体（包括1.145亿个三联体的3个视觉关系）	99.2
MarkG [7]	B-MMKG	Wikidata	Google Engine和Laion-5B	检查图片格式 ，移除损坏、低质量和重复的图片；使用 CLIP对异常的视觉嵌入移除；手动对不合理的图片删除	包含2063个类比实体，8881个邻居实体，27个类比关系和 165 个其他关系	通过Google Engine 和Laion-5B 查询获取,每个实体获取5张图片
GAIA [15]	B-MMKG	多媒体新闻文档	Freebase,GeoNames	使用细粒度分类方法；使用启发式规则对文档特征提取	约4.57×10^5个实体，6.7×10^4个三元组，3.8×10^4概念（包括文本和视觉）	—
MMEKG [16]	B-MMKG	维基百科,BookCorpus,CC3M&CC12M,C4(新闻)	WordNet	使用事件分类、物体识别、事件关系提取三种方法对数据质量控制	约9.9×10^5个实体，644类关系，8.63×10^8 个概念，9.34×108个三元组（包括文本和视觉）	—
BEIC [17]	B-MMKG	文章中提取的命名实体和图像中检测的视觉对象	维基百科, GoodNews, NYTimes800k数据集中的新闻文章	使用跨模态实体匹配模块测量命名实体；视频中图像相似度计算	包含 126 295 对命名实体和图片	维基百科页面的首张图片代表对应的实体
AspectMMKG [18]	AB-MMKG	维基百科和谷歌	Google Engine	用于图像选择的判别模型	2380 个实体，18 139 个三元组，新增实体的不同方面（或属性）相关联的图片645 383个	271.2
