# Supplementary material
Source: ML conference proceedings conference paper supplement (https://openreview.net/forum?id=xg0fmtqh8d)
Supplement: supplementary_material [file 91_美国对俄罗斯金融制裁的法律机制与法律挑战_李姝娟.xlsx]

## Sheet: Sheet
制裁项目	与乌克兰相关的制裁项目	俄罗斯有害境外活动的制裁项目
生效时间	2014年3月6日	2022年3月1日
专项性法律	«以制裁反击美国敌人法»(2017)«支持乌克兰自由法»(2014)«支持乌克兰主权、完整、民主和经济稳定法»(2014)	«保护欧洲能源安全法»(2019)«停止进口俄罗斯石油法»(2022)«中止与俄罗斯和白俄罗斯的正常贸易关系法»(2022)
部门法规	«乌克兰相关制裁条例»	«俄罗斯有害外国活动制裁条例»
行政命令	EO13660、EO13661、EO13662、EO13685、EO13849、EO13883、EO14065	EO14024、EO14039、EO14066、EO14068、EO14071
指令	Directive1~4(underEO13662)	Directive1A、Directive2~4(underEO14024)
通用许可	乌克兰通用许可第11号、第18~25号	俄罗斯相关通用许可1A、2、5、6C、7A、8G、13E、14、18、19、20、25C、27、31、38A、40C、42、44、46、50、52~68
