# Supplementary material
Source: ML conference proceedings conference paper supplement (https://openreview.net/forum?id=xg0fmtqh8d)
Supplement: supplementary_material [file 92_数字时代的认知域安全:理论解构、风险生成及治理路径.xlsx]

## Sheet: Sheet
特征转向	传统视角	安全视角
主体多元化	国家主导	国家主导，多种力量混合参与
对象精准化	泛众化	精准化
驱动智能化	基于经验和信息	基于算法和数据
战略隐蔽化	地缘政治博弈	地缘认知博弈
领域全局化	有限领域	复合领域
