# Supplementary material
Source: ML conference proceedings conference paper supplement (https://openreview.net/forum?id=xg0fmtqh8d)
Supplement: supplementary_material [file 93_美国对拉美经济战略的调整及其影响.xlsx]

## Sheet: Sheet
国家/地区	GDP	出口	进口	贸易	EV/GDP
中国	0.018	0.077	-0.071	0.010	-0.033
美国	0.088	5.833	1.115	2.358	-0.054
巴西	0.099	0.062	-0.060	0.026	-0.091
墨西哥	2.926	4.889	9.138	6.951	1.645
秘鲁	-0.013	4.547	-0.216	3.010	-0.119
智利	-0.005	-0.094	-0.169	-0.120	-0.118
欧盟	0.076	0.168	-0.086	0.043	-0.041
日本	-0.047	-0.043	-0.168	-0.101	-0.025
韩国	-1.046	1.231	16.188	7.494	5.098
加拿大	1.803	4.318	6.944	5.549	0.493
印度	0.016	0.228	-0.128	0.042	-0.061
印度尼西亚	0.135	-0.186	0.048	-0.101	-0.146
澳大利亚	0.007	-0.278	-0.093	-0.209	-0.040
马来西亚	-0.026	0.092	-0.099	0.021	-0.151
新西兰	-0.004	2.658	-0.085	1.557	-0.054
菲律宾	-0.011	1.935	-0.021	1.061	-0.033
泰国	0.132	0.475	-0.021	0.274	-0.177
俄罗斯	0.608	1.355	0.545	1.151	-0.312
新加坡	0.238	0.625	0.039	0.392	-0.144
越南	0.446	1.889	0.249	1.185	-0.063
巴林	-0.021	0.193	-0.104	0.076	-0.201
文莱	-0.014	-0.336	-0.066	-0.271	-0.049
科威特	-0.006	-0.480	-0.129	-0.419	-0.124
卡塔尔	-0.005	4.719	-0.089	4.106	-0.051
沙特阿拉伯∗	-3.00E-04	1.904	-0.130	1.387	-0.056
其他地区	0.386	0.718	0.405	0.556	0.158
世界	0.171	1.186	1.186	1.186	0.061
