# Supplementary material
Source: ML conference proceedings conference paper supplement (https://openreview.net/forum?id=xg0fmtqh8d)
Supplement: supplementary_material [file 94_人工智能大模型医学应用研究_郭华源.xlsx]

## Sheet: Sheet
名称	发表时间	参数量(亿)	训练数据量	语种	研制单位	主要架构	训练策略	支撑硬件	应用领域
MoE[25]	2017.1	1370	新闻语料库1000亿词	英语	Google	基于稀疏门控的专家层混合体, 由多达数千个前馈子网络组成	引入稀疏门控专家混合层, 每一个样本 都有一个可训练门控网络计算稀疏组合	16~32 Tesla K40 GPUs	机器翻译 多语言翻译
GPT[2]	2018.7	1.1	语料库7000本书	英语	OpenAI	基于Transformer的特征抽取器, 保留有标注的多头注意力	两阶段训练, 分别采用无监督预训练语言模型和有监督的下游任务fine-tuning	GPU	文本生成
BERT[1]	2018.10	1~3	开源语料+维基百科33亿词	英语	Google	多层双向转换编码器+双向自注意力机制	使用特征提取器 Transformer和语言模型实现预训练的深度双向表示	TPU	语言表征 文本分类
GPT-2[26]	2019.1	15	Web Text 40 GB	英语 法语	OpenAI	由多层单向 Transformer的解码器构成一种自回归模型	以对数线性方式进行多任务小样本学习	GPU	机器问答 阅读理解 文本生成
Megatron-LM[27]	2019.9	83	聚集语料174 GB	英语	NVIDIA	PyTorch Transformer+模型并行+数据并行	采用简单高效的层内模型并行方法, 并在原生PyTorch 中插入通信指令	GPU V100 (512块)	自然语言处理
Turing-NLG [28]	2020.2	170	文本	英语	微软	基于Transformer的生成语言模型, 通过生产单词完成开放式文本任务	基于NVIDIA DGX-2 和Infini-Band实现快速通信, 降低模型并行复杂度	GPU V100 (256块)	编写故事 生成答案 文本摘要
BioBERT[29]	2020.4	–	生物医学180亿词	英语	高丽大学	与BERT结构基本相同, 多层双向转换编码器+双向自注意力机制	基于NSML架构, 进行“BERT通用领域语料+BioBERT生物医学语料”双层预训练	GPU V100 (8块)	实体识别 关系抽取 知识问答
GPT-3 [30]	2020.5	1750	文本570 GB	英语	OpenAI	采用可替代密集和局部带状稀疏注意力机制, 构建自回归语言模型	基于小样本学习策略, 在每个矩阵相乘的内部以及不同网络层之间实现混合并行	GPU集群 V100	文本生成 机器问答
Oscar[31]	2020.7	–	图像文本对650万条	英语	微软 华盛顿大学	基于图像文本表示的多层Transformer 建立视觉语言预处理模型	提取图像静态对象的标记信息, 进行图像-文本对的表征学习	GPU Cluster	视觉语言理解与生成等
T5 [32]	2020.7	110	文本750 GB	英语	Google	为NLP预训练提供一个文本到文本的通用框架	基于模型并行和数据并行, 构建无监督/有监督的文本生成预训练任务	Cloud TPU (1024块)	语言理解任务
Switch Transformer[20]	2021.1	16000	爬虫语料库	英语	Google	基于稀疏路由结构, 每轮迭代触发部分Expert计算	采用稀疏激活模型有利于TPU计算, 简化MoE路由算法	TPU	自然语言处理 机器翻译
DALL-E [4]	2021.2	120	文本图像对330万	英语	OpenAI	采用dVAE编解码+16 位混合精度架构	采用两阶段训练, 离散变分自编码+自回归转换器	GPU V100 (1024块)	文本图像生成
CLIP[3]	2021.2	0.63	文本图像对4亿	英语	OpenAI	通过预训练图像编码和文本编码, 建立零样本分类器	利用对比式训练、自监督学习等技术减少人工标注, 将图像分类转为图文匹配	GPU V100 (592块)	文本图像分类
M6[5]	2021.5	1000	1.9 TB图像+292 GB 文本	中文	阿里 清华大学	基于多GPU架构, 每个MoE层嵌入多个Expert以充分使用内存	基于自关注+大规模预训练, 建立多模态、多任务、百万级 Transformer模型	GPU A100 (128块)	图像文本转换 多模态文本转换
PanGu-α[6]	2021.6	1000	文本语料库 100 GB	中文	华为	采用基于 Transformer的自回归语言模型	支持数据并行、操作级模型并行、流水线模型并行、优化器模型并行和重栅格化	Ascend 910 (1024块)	文本摘要 自动问答 对话生成等
鹏城PanGu-α	2021.6	2000	文本语料库 1.1 TB	中文	华为	采用基于 Transformer的自回归语言模型	支持数据并行、操作级模型并行、流水线模型并行、优化器模型并行和重栅格化	Ascend 910 (2048块)	知识问答 知识检索 知识推理
CPM-2[33]	2021.6	110	悟道语料 2.3 TB	中文	清华大学	引入知识继承, 利用现有预训练语言模型加速训练	将自注意力和前馈层分离, 使用prompt tuning减存特定的任务参数	GPU	语言理解 文本生成 机器翻译
CPM-2-MoE [33]	2021.6	1980	悟道语料 2.3 TB 300 GB	中文 英文	清华大学	引入中英文知识继承, 利用预训练语言模型加速训练	基于模型并行性分离自注意力和前馈层, 使用prompt tuning减存任务参数	GPU	语言理解 文本生成 机器翻译
MengZi [34]	2021.10	1.03	维基百科、新闻和爬网 300 GB	中文	上海交通大学等	基于RoBERTa的轻量级预训练模型	通过大模型蒸馏和小模型初始化, 突出多模态、辨别力、生成性与领域特定性	Tesla 3090 Ti (32块)	语言理解 文本生成 视觉应用
CogView [35]	2021.11	40	文本图像对 3千万	中文	清华大学	基于自回归模型, VQ-VAE和 Transformers相结合的文本图像转换框架	采用PB-Relaxation和 Sandw-ich-LN机制	GPU	文本图像生成
快手推荐模型	2021.11	19000	WebText+视频	中英文	快手	基于数据、特征、网络结构以及单列用户交互等特点, 设计多任务学习新框架	基于MMoE的多目标预估优化算法, 提取视频类、上下文及用户历史行为等特征	CPU+GPU	短视频推荐
女娲 [7]	2021.11	8.7	语音+图像+视频	英语	微软 北京大学	基于邻近稀疏注意机制, 综合利用空间-时间轴的邻近特性	基于3D Transformer的通用编解码, 进行自回归视觉合成预训练	GPU A100 (64块)	多模态图像合成 视觉合成
SLIP[36]	2021.12	3.07	YFCC15M+CC3M+CC12M	英语	Facebook	采用无分类标注的语言监督和图像自监督, 联合学习视觉特征	将图像自监督学习与CLIP多任务学习相结合	GPU V100 (64块)	视觉识别任务
Gopher[37]	2021.12	2800	多源文本库 10.5 TB	英语	Google	采用自回归Transfor-mer 架构, RMSNorm 和相对位置编码机制	使用JAX的pmap转换, 高效表示数据和模型并行性	TPU v3	阅读理解 事实核查 语言识别
BioBART[8]	2022.4	4	生物医学预料 41 GB	英语	清华大学 IDEA	面向生物医学领域, 采用双向自回归 Transformer构建生成式语言模型	基于DeepSpeed架构, 采用领域自适应策略, 训练生成式语言预训练模型	GPU A100 (16块)	医学语言生成 对话、总结 命名实体识别
悟道文澜 BriVL [38]	2022.6	百亿级	图像+文本 6.5亿	中英文	中国人民大学	针对弱语义相关数据特点, 采用自监督“视觉-语言”桥接技术构建多模态基础模型	采用双塔结构对图像和文本输入进行独立编码, 并基于 DeepSpeed架构进行训练	GPU A100 (112块)	文本图像生成 遥感场景分类 中文新闻分类
