# Supplementary material
Source: ML conference proceedings conference paper supplement (https://openreview.net/forum?id=xg0fmtqh8d)
Supplement: supplementary_material [file 95_AI绘画研究综述_张泽宇.xlsx]

## Sheet: Sheet
AI绘画平台	基础模型	使用方式	生成速度/s	图像分辨率
DALL-E2	扩散模型+CLIP	网页输入文本描述	≈1	1024×1024
Midjourney	VAE+PLM+GAN	Discord 输入文本描述	≈10	2048×1280
Imagen	扩散模型+CLIP+其他正则化方法	目前无法使用	—	1024×1024
Stable Diffusion	扩散模型+CLIP+其他正则化方法	网页输入文本描述或上传图像进行生成、编辑、转换等	≈10	取决于输入文本描述或上传图像的分辨率
Fotor	VAE+GAN+其他正则化方法	网页上传图像进行编辑、美化、滤镜等	≈5	取决于上传图像的分辨率
NightCafe	GAN+其他正则化方法	网页上传图像进行风格迁移、艺术效果等	≈10	取决于上传图像的分辨率
DeepAI	GAN+其他正则化方法	网页输入文本描述或上传图像进行生成、编辑、转换等	≈5	取决于输入文本描述或上传图像的分辨率
百度文心一格	ERNIE-ViLG+GAN+其他正则化方法	网页输入文本描述或上传图像进行生成、编辑、转换等	≈5	取决于输入文本描述或上传图像的分辨率
