# Supplementary material
Source: ML conference proceedings conference paper supplement (https://openreview.net/forum?id=xg0fmtqh8d)
Supplement: supplementary_material [file 96_德国综合安全观:理论缘起、历史演进与实践评估.xlsx]

## Sheet: Sheet
学派	本体论	认识论	方法论
欧洲主义	观念主义：安全是社会构建与社会认知；社会与国家行为体同为安全研究的指涉对象。	后实证主义：强调文化、规范认同与威胁认知。安全议程难以价值中立，安全专家对安全威胁进行话语建构。	整体主义：安全除军事领域，还包括政治、经济、社会与环境等问题；安全有“内传”与“外溢”效应。
美国主义	物质主义：安全威胁是客观既定，以军事力量为基础的军备竞赛与国际冲突等，安全研究重心是国家行为体。	实证主义：采用自然科学研究方法，通过理性主义、经济学等方法解释国家行为因果关系。	个体主义：安全的分割性与绝对性。从国家与军事领域分析安全问题，一国安全威胁主要来自他国，排除非军事领域议题。
