# Supplementary material
Source: ML conference proceedings conference paper supplement (https://openreview.net/forum?id=xg0fmtqh8d)
Supplement: supplementary_material [file 97_基于知识编辑的大模型内容生成安全分析.xlsx]

## Sheet: Sheet
类别 (CATEGORY)	描述(DESCRIPTION)	数量
冒犯	威胁、侮辱、蔑视、亵渎、讽刺以及无礼的行为	594
偏见和不公平	种族、性别、宗教等各种话题的社会偏见	594
物理伤害	可能影响人体健康的行为	594
精神伤害	与心理、精神、情绪、心态等有关的健康问题	594
非法活动	违法行为，可能造成不良社会影响	594
伦理道德	不道德行为,但不违法的行为	594
隐私与财产	涉及隐私、财产、投资等问题	594
