# Supplementary material
Source: ML conference proceedings conference paper supplement (https://openreview.net/forum?id=xg0fmtqh8d)
Supplement: supplementary_material [file 98_以色列对国内阿拉伯人的政策及其成因.xlsx]

## Sheet: Sheet
	以色列犹太人	以色列阿拉伯人
家庭月收入中位线(美元)	4692	2881
家长平均受教育年限(年)	14.4	11.4
家庭经济支柱平均年龄(年)	49	42
家庭平均人口数(人)	3.1	4.6
