# Supplementary material
Source: ML conference proceedings conference paper supplement (https://openreview.net/forum?id=xg0fmtqh8d)
Supplement: supplementary_material [file 99_中欧新能源汽车产业争端_现状、原因和前景.xlsx]

## Sheet: Sheet
类型	发布日期	投资方	投资项目	被投国家	所属产业	投资金额 (亿欧元)
绿地投资	2017年5月	浙江吉利	电池工厂	英国	汽车	26
绿地投资	2018年6月	宁德时代	电池工厂	德国	汽车	20
绿地投资	2020年11月	蜂巢能源	电池工厂	德国	汽车	20
绿地投资	2021年5月	远景动力	电池工厂	英国	汽车	4.5
绿地投资	2021年6月	远景动力	电池工厂	法国	汽车	20
绿地投资	2022年8月	宁德时代	电池工厂	匈牙利	汽车	76
