# Supplementary material
Source: ML conference proceedings conference paper supplement (https://openreview.net/forum?id=xg0fmtqh8d)
Supplement: supplementary_material [file 100_人工智能大模型医学应用研究_郭华源.xlsx]

## Sheet: Sheet
对比内容	迁移训练	原生训练
数据需求	较大	很大
算力资源	较多	很多
模型算法	在原有基础上升级、改造、扩展	构建完整、创新的模型算法
技术要求	较高	很高
研发投入	较大	很大
团队协作	需求很大	需求很大
应用结合	较紧密	较宽广
