# Supplementary material
Source: ML conference proceedings conference paper supplement (https://openreview.net/forum?id=xg0fmtqh8d)
Supplement: supplementary_material [file 101_制度变迁与权力博弈:国际货币体系的双重困境.xlsx]

## Sheet: Sheet
时间	2012—2016年（三个月移动标准差）				2018—2022年（三个月移动标准差）				（2018—2022年）减（2012—2016年）
统计量	平均值	中位数	最小值	最大值	平均值	中位数	最小值	最大值
人民币	.0261905	.0148538	.0029751	.1322773	.0687562	.0540531	.0143735	.1903629	.0425657***（36.93）
日元	1.949696	1.769868	.3647391	5.780111	1.612387	1.09839	.4536805	5.624107	-.3373093***（-8.10）
英镑	.0234518	.0202363	.0094363	.0683739	.022011	.0196459	.0090057	.0467265	-.0014408**（-2.54）
欧元	.0193933	.0167355	.0073402	.0530436	.0144143	.0137683	.0049942	.0347541	-.004979***（-11.59）
加元	.0174493	.0141126	.0049428	.0487127	.015961	.0141119	.005894	.0468451	-.0014883***（-3.65）
澳元	.0170602	.0162659	.0053278	.0455048	.0131295	.0109705	.0048152	.0348406	-.0039307***（-9.71）
