# Supplementary material
Source: ML conference proceedings conference paper supplement (https://openreview.net/forum?id=xg0fmtqh8d)
Supplement: supplementary_material [file 102_弱国升级不对称领土争端的行为逻辑.xlsx]

## Sheet: Sheet
控制变量	案例一：1982年马岛战争	案例二：2008年俄格冲突
国际体系结构	美苏两极	美国单极
争议领土类型	岛屿	陆上边界
争议领土的地理位置	临近阿根廷而远离英国	与俄格两国毗邻
双方对争议领土的宣称	双方都宣称对马岛具有主权	格鲁吉亚宣称对南奥塞梯具有主权，俄罗斯则维持南奥塞梯独立
领土争端的持续时间	长	短
是否面临严重国内矛盾	是	否
弱国政体类型	军政府	文官政府
两国是否接壤	不接壤	接壤
弱国在过去一年是否有领导人更替	是	否
强国在过去一年是否有领导人更替	否	是
