# Supplementary material
Source: ML conference proceedings conference paper supplement (https://openreview.net/forum?id=xg0fmtqh8d)
Supplement: supplementary_material [file 103_以色列工党社会民主主义意识形态的右倾嬗变及其影响.xlsx]

## Sheet: Sheet
时间	得票率(%)	议会排名	是否进入内阁
2003年1月	14.5	2	否
2006年3月	15.1	2	是
2009年2月	9.9	4	是
2013年1月	11.4	3	否
2015年3月	18.7	2	否
2019年4月	4.4	6	未能组阁
2019年9月	4.8	8	未能组阁
2020年3月	5.8	6	是
2021年3月	6.1	6	是
2022年11月	3.7	4	否
