# Supplementary material
Source: ML conference proceedings conference paper supplement (https://openreview.net/forum?id=xg0fmtqh8d)
Supplement: supplementary_material [file 104_多模态知识图谱融合技术研究综述_陈囿任.xlsx]

## Sheet: Sheet
多模态预训练模型	主要任务	视觉特征提取器	技术基础
VideoBERT [78]	文本-视频融合; 通过文本输入预测视频或通过文本插图; 根据视频对文本预测并可以对视频生成文本摘要	S3D	BERT
HERO [79]	视频帧-图片-文本融合; 通过掩码对语言、 视频帧、 帧顺序建模以及视频字幕匹配任务	—	Transformer
VL-BERT [80]	图片-文本融合; 通过掩码对文本、 图像类别预测	Fast R-CNN	BERT
ImageBERT [81]	图片-文本融合; 通过掩码做文本预测、 图像类别分类、 图像特征回归以及图片-文本对齐任务	Fast R-CNN	BERT
UniVL [82]	视频-文本融合; 条件屏蔽语言及帧模型; 视频-文本对齐，语言重建任务	S3D&#10;Resnet-152&#10;Resnet-101	Transformer
LXMERT [83]	文本-视频融合; 通过五种不同的预训练模型使模型可以学习视觉和语言之间的联系; 文本-视频对齐、 知识融合，视觉问答	—	Transformer
ERNIE-ViL [84]	图片-文本融合; 视觉问答，视觉常识推理，图像&文本检索		Transformer
ViLBERT [85]	图片-文本融合; 通过掩码做文本预测图像分类，图像-文本对齐	Fast R-CNN&#10;Resnet101	BERT
ViLT [86]	文本-视觉特征融合; 最简单的视觉和语言模型图像分类、 文本检索	—	Transformer
VL-BEiT [87]	图像-视频 (文本) 融合; 对单模态及多模态数据掩码在图像分类和语义分割	—	Transformer
Beit-3 [62]	图片-文本融合; 掩码 “语言建模” 图像分类、 视觉推理、 问答跨模态检索	—	Transformer
VLMo [88]	图片-文本融合; 多路模型用于图像文本多模态专家领域	—	VLMo
ActBERT [89]	视频-文本融合; 通过掩码对文本、 动作、 物体预测，视频-文本对齐	Faster R-CNN	Transformer
