# Supplementary material
Source: ML conference proceedings conference paper supplement (https://openreview.net/forum?id=xg0fmtqh8d)
Supplement: supplementary_material [file 105_AI绘画研究综述_张泽宇.xlsx]

## Sheet: Sheet
数据集	数据集介绍	模型	模型参数量/10 6	FID 得分	IS 得分
CIFAR-10	由60 000 张32×32 彩色图像组成。这些图像被标记为10 个互斥类别之一: 飞机、 汽车、 鸟、 猫、 鹿、 狗、 青蛙、 马、 船和卡车。每个类别有6 000 张图片, 其中有5 000 张训练图片和1 000 张测试图片	StyleGAN-XL [36]	≈12 000	1.85	—
		TransGAN [37]	≈22	9.26	9.02
		MIX-BigGAN [38]	≈50	8.17	9.67
		E2-GAN [39]	≈8.6	11.26	8.51
		PPOGAN [40]	≈8.7	10.70	8.69
		MSGAN [41]	≈8.9	11.40	—
		AutoGAN [42]	≈8.5	12.42	8.55
		WGAN-ALP [43]	≈8.4	12.96	8.34
		PA-GAN [44]	≈8.6	16.10	—
		BigGAN [33]	≈143	14.73	9.22
ImageNet 64	将原始ImageNet数据集下采样到64×64, 共包含1 281 167 张训练图像和50 000 张测试图像, 分为1 000 个类别	RIN [45]	≈120	1.23	66.50
		CDM [46]	≈150	1.48	—
		StyleGAN-XL	≈12 000	1.51	—
		CTM [47]	≈140	1.73	64.29
		Improved DDPM [48]	≈8.6	2.92	—
CelebA 64	包含了202 599 张名人人脸图片, 每张图片都有40 个属性标签, 如性别、 年龄、 发型等	Diffusion StyleGAN2 [49]	≈140	1.69	—
		Patch Diffusion [50]	≈150	1.77	—
		Soft Diffusion [51]	≈8.6	1.85	—
