# Supplementary material
Source: ML conference proceedings conference paper supplement (https://openreview.net/forum?id=xg0fmtqh8d)
Supplement: supplementary_material [file 106_AIGC大模型测评综述:使能技术、安全隐患和应对_许志伟.xlsx]

## Sheet: Sheet
测评基准	发布机构	简介	链接
MMLU [37]	LMSYS Org (大型模型系统组织)	涵盖STEM、 人文科学、 社会科学等57 个科目	https://github.com/NLP-Core-Team/mmlu_ru
GAOKAO [38]	复旦大学	1 781 道客观题和1 030 道主观题	https://github.com/OpenLMLab/GAOKAO-Bench
C-Eval [39]	清华大学、 上海交通大学和爱丁堡大学合作	52 个不同学科的13 948 个多项选择题	https://github.com/hkust-nlp/ceval
AGIEval [40]	微软亚洲研究院	涵盖全球20 种面向普通人类考生的官方、 公共、 高标准的录取和资格考试, 包含中英文数据	https://github.com/ruixiangcui/AGIEval
CMMLU [41]	MBZUAI、 上海交通大学、 微软亚洲研究院	67 个学科, 11 582 道选择题	https://github.com/haonan-li/CMMLU
M3Exam [42]	阿里巴巴达摩院	首个多语言多模态测试基准M3Exam, 涵盖12 317道题目	https://github.com/DAMO-NLP-SG/M3Exam
BIG-Bench [43]	Google	204 个任务, 涉及语言学、 儿童发展、 数学、 常识推理、 生物学、 物理学、 社会偏见、 软件开发等领域的问题	https://github.com/google/BIG-bench
HELM [44]	斯坦福大学	在推理场景、 含虚假信息场景等多个场景中评估	https://github.com/stanford-crfm/helm
PromptBench [56]	微软亚洲研究院	首个大语言模型提示鲁棒性的评测基准	https://github.com/microsoft/promptbench
Arena [61]	LMSYS Org (大型模型系统组织)	4.2 万匿名用户参与投票	https://github.com/id-Software/Quake-III-Arena
MT-Bench [62]	LMSYS Org (大型模型系统组织)	80 个高质量的多轮对话问题	https://github.com/SiddhanthHegde/Dravidian-MTL-Benchmarking
MME [63]	腾讯优图实验室	多模态大语言模型的综合评价标准	https://github.com/open-mmlab/mmengine
L-Eval [64]	复旦大学	涵盖了17 个大类、 453 个问题, 包括事实性问答、 阅读理解、 框架生成、 段落重写、 摘要、 数学解题、 推理、 诗歌生成、 编程等各个领域	https://github.com/OpenLMLab/LEval
KoLA [65]	清华大学	基于19 个关注实体、 概念和事件的任务, 参考了Bloom 认知体系, 从知识的记忆、 理解、 应用和创造4 个层级, 从深度而非广度去衡量大语言模型处理世界知识的能力	https://github.com/THU-KEG/KoLA
DynaBench [66]	Facebook	第一个用于人工智能领域的动态数据收集和基准测试平台, 使用人类测试和模型一起循环迭代, 目的是创造具有挑战性的新数据并且更优化的人工智能模型	https://github.com/facebookresearch/dynalab
GLUE-X	微软亚洲研究院	基于分布外泛化的自然语言理解模型测试	https://github.com/YangLinyi/GLUE-X
AlpacaEval [68]	斯坦福大学	用于对抗生成式预训练 (GPT) 模型的弱点, 并更全面地反映模型的真实能力	https://github.com/ashmita-5/NLP-Assignment-8---Instruction-Tuning-with-hf-AlpacaEval
PandaLM [69]	微软亚洲研究院	第一个评测大模型的大模型, 进行保护隐私、 可靠、 可复现及廉价的大模型评估	https://github.com/WeOpenML/PandaLM
SocKET [70]	微软亚洲研究院	包含58 个NLP 任务测试社交知识, 分为5 个类别: 幽默和讽刺、 攻击性、 情感和可靠性	https://github.com/facebookincubator/SocketRocket
MATH [71]	加州大学伯克利分校	测评大模型在数学领域的推理和解决问题的能力	https://github.com/ossu/math
APPS [72]	加州大学伯克利分校	测评大模型代码生成能力	https://github.com/serhii-londar/open-source-mac-os-apps
OpenLLM [73]	HuggingFace	由HuggingFace组织的一个大模型评测榜单	https://github.com/traceloop/open-llmetry
OpenCompass	上海AI实验室	70+数据集, 40 万道题目	https://github.com/open-compass/opencompass
Xiezhi (獬豸)	复旦大学	516 个具体学科, 249 587 道题目	https://github.com/MikeGu721/ XiezhiBenchmark
FlagEval	智源	22 个评测数据集, 84 433 道题目	https://github.com/FlagOpen/Flag-Eval
BBT CFLEB [74]	超对称(北京)科技有限公司	涵盖8 个标准语言任务, 衡量不同模型的多维能力	https://github.com/ssymmetry/BBT-FinCUGE-Applications
FinEval [75]	上海财经大学	包括4 661 个问题, 涵盖34 个不同的学科	https://github.com/SUFE-AIFLM-Lab/FinEval
FinanceIQ		涵盖10 个金融大类及36 个金融小类, 总计7 173 个单项选择题	https://github.com/manan3101/FinanceIQ-Assistant
MultiMedQA [76]	Google	涵盖了医学考试、 医学研究等领域的问题和回答, 能够更全面地测试大模型的能力	https://github.com/monk1337/MultiMedQA
CritiqueLLM [77 ]	智普AI	针对各类指令遵循任务上大模型的生成结果提供高质量的评价分数和评价解释	https://github.com/thu-coai/CritiqueLLM (即将发布)
MentaLLaMA [78]	Meta AI	MentaLLaMA 大模型注重可解释性和公平性, 通过设计透明的网络结构和引入公正性评估指标, 减少人工智能系统中的偏见和不公平性	https://github.com/SteveKGYang/MentalLLaMA
Adversarial GLUE [79]	美国伊利诺伊大学	评估现代大规模语言模型在各种类型的对抗性攻击下的漏洞	https://github.com/AI-secure/adversarial-glue
ASSERT [80]	加利福尼亚大学	自动生成涵盖不同类型鲁棒性提示的方法, 探索了人工智能安全关键领域中大型语言模型鲁棒性的自动评估, CValues 手动收集了10 个场景的对抗性安全提示, 并由专家诱导了8 个领域的责任提示	https://github.com/webmozarts/assert
CValues [81]	阿里巴巴达摩院	手动收集了10 个场景的对抗性安全提示, 并由专家诱导了8 个领域的责任提示	https://github.com/X-PLUG/CValues
GOAT-Bench [82]	香港浸会大学	包含超过6 000 个不同的模因, 涵盖一系列主题, 由包括5 个相互交织的仇恨、 厌女、 冒犯、 讽刺和有害性等方面的开放数据组织构建	https://github.com/Ram81/goat-bench
SC-Safety [83]		针对中文AIGC 大模型的多轮开放式问题对抗安全基准, 包含4 912 个开放式问题, 涵盖20 多个安全子维度,系统地评估AIGC 大模型的安全性	https://github.com/CLUEbenchmark/SuperCLUE-Safety
SafetyBench [84]		评估AIGC 大模型安全性的综合基准, 其中包含11 435 个不同的多项选择题, 涵盖7 个不同的安全问题类别	https://github.com/thu-coai/Safety-Bench
SafeText [85]	清华大学	探索语言模型中的物理安全性的基准, SafeText是一个包含常识性的物理安全数据集, 其中包含人工编写的现实生活场景以及每个场景的安全/不安全建议对	https://github.com/sharonlevy/SafeText
