# Supplementary material
Source: ML conference proceedings conference paper supplement (https://openreview.net/forum?id=xg0fmtqh8d)
Supplement: supplementary_material [file 107_超越发展援助_欧盟的萨赫勒战略调整.xlsx]

## Sheet: Sheet
国家	资金规模	优先行动领域
布基纳法索	6.28	善治和文化；医疗卫生；粮食安全、农业和水；可持续能源利用
马里	6.65	和平建设和国家改革；乡村发展和粮食安全；教育；基础设施
毛里塔尼亚	1.6	乡村发展；善治；医疗卫生系统
尼日尔	7.16	粮食安全；社会服务供给；安全、治理和和平建设；道路基础设施
乍得	5.42	粮食安全、营养和乡村发展；自然资源管理；加强法治
