# Supplementary material
Source: ML conference proceedings conference paper supplement (https://openreview.net/forum?id=xg0fmtqh8d)
Supplement: supplementary_material [file 108_相互依赖武器化的机制探析.xlsx]

## Sheet: Sheet
名称		轴点形态特征	轴点的现实案例
市场型权力		与其他节点间以大量指向该轴点的连线相连，且连线承载的度值较大，具有高入度	美国的通信网络市场
资源型权力		与其他节点间以大量由该轴点发出的连线相连，且连线承载的度值较大，具有高出度	俄罗斯的油气资源供应
通道型权力	物质性	掌握网络中的“割点”或“桥”，具有高介数中心性	航道、基站
	非物质性		保险、信用评级
