# Supplementary material
Source: ML conference proceedings conference paper supplement (https://openreview.net/forum?id=xg0fmtqh8d)
Supplement: supplementary_material [file 109_基于大语言模型的复杂任务自主规划处理框架.xlsx]

## Sheet: Sheet
任务属性	符号表示	属性描述
所在位置	si	在序列中的逻辑关系
工具需求	ai	执行该任务的工具需求
参数配置	pi	调用工具时的参数配置
运行结果	ri	该任务的运行结果
