# Supplementary material
Source: ML conference proceedings conference paper supplement (https://openreview.net/forum?id=xg0fmtqh8d)
Supplement: supplementary_material [file 110_美国对拉美经济战略的调整及其影响.xlsx]

## Sheet: Sheet
数据指标	详情	来源
国别间的投入和产出数据	直接获得	世界银行的世界发展指数(WDI)数据库
制造业产出	1－非制造业产出	世界投入—产出数据库(WIOD)
非制造业产出	农业、服务业在GDP中的比重	世界投入—产出数据库(WIOD)
资本和劳动力投入，以及中间品和劳动的投入	资本/GDP的比重	世界投入—产出数据库(WIOD)
劳动要素的投入	劳动收入(工资)	国际劳工组织
双边贸易	直接获得	联合国商品贸易统计数据库(UNCOMTRADE)、世界投入—产出数据库(WIOD)
贸易成本	计算获得	借鉴Novy(2013)的方法∗
进口关税	最惠国平均关税率	WTO统计数据库
非关税壁垒	贸易成本减去进口关税率	计算得到
消费替代弹性	效用函数中不同产品的消费偏好替代弹性	来自其他文献∗∗
生产要素替代弹性	生产函数中不同要素的替代弹性	来自其他文献∗∗
