# Supplementary material
Source: ML conference proceedings conference paper supplement (https://openreview.net/forum?id=xg0fmtqh8d)
Supplement: supplementary_material [file 111_印尼与海合会成员国外交关系的新发展及其动因.xlsx]

## Sheet: Sheet
	2017 年	2018 年	2019 年	2020 年	2021 年	2022 年
沙特	5,487.1	6,308.4	5,810.5	6,009.9	5,761.3	5,962.7
阿联酋	3,283.7	2,003.1	2,678.2	2,990.8	2,114.4	2,539.6
卡塔尔	1,412.9	2,059.4	1,600.9	1,326.6	738.9	887.2
