# Supplementary material
Source: ML conference proceedings conference paper supplement (https://openreview.net/forum?id=xg0fmtqh8d)
Supplement: supplementary_material [file 112_经济特区的政治逻辑——以俄罗斯利佩茨克特区为例_费海汀.xlsx]

## Sheet: Sheet
联邦政府	总体目标	次级目标	目标层次
	重构政治权力	支配地方政治权力	直接委任委托代理合作统治脱离掌控
		支配地方经济权力	共同助力国家政商分隔发展地方利益集团
	重构经济权力	掌握社会财富	资本为国家机构所掌握资本留在国内私人手中资本外逃投资干涸
		支配财富走向	国家控制企业国家影响企业企业影响国家
		扩大财富规模	直接占有发展成果间接分享发展成果经济萎缩崩溃
