# Supplementary material
Source: ML conference proceedings conference paper supplement (https://openreview.net/forum?id=xg0fmtqh8d)
Supplement: supplementary_material [file 113_历史叙事在国家对外政策行为中的运用逻辑——以俄乌冲突引发的叙事争议为例.xlsx]

## Sheet: Sheet
	叙事主题	叙事模板	模板应用
俄罗斯	俄罗斯有保护文化同盟的责任	俄罗斯民族构建基于与自己的文化共同体的关系。俄罗斯对居于其领土外、同属一个文化同盟的人有保护的责任。同属一个文化同盟的人对俄罗斯国家保持忠诚是合理的。	俄乌同属一个文化共同体。克里米亚、顿巴斯是俄罗斯历史领土，俄罗斯有责任保护克里米亚、顿巴斯的俄罗斯人和俄语居民。2014年克里米亚“入俄”、2022年乌东四州“公投入俄”都是基于对同一文化同盟身份的认可。
乌克兰	民族主义是乌克兰构建认同的核心	外部强权阻碍了乌克兰民族文化的发展。乌克兰民族主义和本土文化兴起。反抗外部强权者被视为民族独立英雄。乌克兰摆脱外敌压迫。维护了民族独立。	俄罗斯文化阻碍了乌克兰民族文化发展。强硬、彻底的“去俄罗斯化”是构建现代乌克兰民族的核心。反抗俄罗斯的叙事被视为主流，曾反抗过俄罗斯统治的历史人物获得高度评价。
