# Supplementary material
Source: ML conference proceedings conference paper supplement (https://openreview.net/forum?id=xg0fmtqh8d)
Supplement: supplementary_material [file 114_复合制度主义:基于中阿合作论坛的实证研究.xlsx]

## Sheet: Sheet
序号	人文交流机制	负责(牵头)部门
1	中阿广播电视合作论坛	中宣部、国家广电总局
2	中阿艺术节、文化旅游合作论坛	文化和旅游部
3	中阿文明对话研讨会	外交部
4	中阿新闻合作论坛	国务院新闻办公室
5	中阿大学校长论坛、中阿智库合作	教育部
6	中阿友好大会	中阿友协
7	中阿妇女论坛	全国妇联
8	中阿非政府组织和社会团体合作	民政部
9	中阿青年友好大使项目	全国对外友协、中阿友协
10	中阿博览会下中阿城市论坛	宁夏等地方省市自治区政府
