# Supplementary material
Source: ML conference proceedings conference paper supplement (https://openreview.net/forum?id=xg0fmtqh8d)
Supplement: supplementary_material [file 115_基于知识编辑的大模型内容生成安全分析.xlsx]

## Sheet: Sheet
数据集	有害问题	越狱提示	有毒回复	安全回复	是非观	事实问答	不安全 类别	能否绕过Chat 模型
SafeGen	√	√	√	√	√	√	7 类	大概率可以
攻击数据集[3-4]	√	√	×	√	×	×	7 类	大概率可以
防御数据集[31-32]	√	大部分有	×	√	×	×	缺少部分	大概率可以
祛毒数据集[28,33-34]	√	×	×	√	×	×	缺少部分	几乎不能
