# Supplementary material
Source: ML conference proceedings conference paper supplement (https://openreview.net/forum?id=xg0fmtqh8d)
Supplement: supplementary_material [file 116_美欧制裁对俄罗斯经济增长的影响——基于合成控制双重差分的两阶段对比分析_徐坡岭.xlsx]

## Sheet: Sheet
变量	定义	出处
Gdpg	以本币现价计量的当季GDP增长率，当年同比	各国统计局；欧盟统计局
Fisout	各国最终消费支出占GDP的比重，以本币现价计量	各国统计局；欧盟统计局；OECD经合组织数据库
Capital	各国资本形成总额占GDP的比重	各国统计局；欧盟统计局；OECD经合组织数据库
Import	各国进口总额占GDP的比重	各国统计局；欧盟统计局；OECD经合组织数据库
Export	各国出口总额占GDP的比重	各国统计局；欧盟统计局；OECD经合组织数据库
Unemp	各国季度平均失业率	各国统计局；欧盟统计局
