# Supplementary material
Source: ML conference proceedings conference paper supplement (https://openreview.net/forum?id=xg0fmtqh8d)
Supplement: supplementary_material [file 117_欧洲农业民粹主义的区域差异与激进右翼的捕获策略.xlsx]

## Sheet: Sheet
	德国	波兰
农业自由化进程	畅行无阻	受到历史、转型等因素的影响
农业生产结构	小型半自给农场最少；中型家庭农场最多；其成员为参与竞争的“新兴资本主义农民”；征地阻力较小；大型农企扩张迅速	小型自给家庭农场最多；中型经营性家庭农场极度欠缺；存在征地阻力；大型农企缓慢扩张
家庭农场特征	具有较强生产性；经营动机明显；文化价值性不强	生产性较弱；守护土地与家园，价值性较强
右翼民粹主义策略	主要为经济策略	经济策略和文化策略并行
农业民粹主义结果	内部容易分化:部分农民群体逐渐支持右翼民粹主义；其他人仍与其保持距离	由于经济与文化的“双重聚合”；更易与右翼民粹主义发生大规模结合
