# Supplementary material
Source: ML conference proceedings conference paper supplement (https://openreview.net/forum?id=xg0fmtqh8d)
Supplement: supplementary_material [file 118_碳中和背景下气候政治的极化与政策偏好.xlsx]

## Sheet: Sheet
	气候升温的人类影响	能源转型立场	气候目标	能源目标	气候政策工具偏好
德国社民党(SPD)	认可	支持	2050年前实现碳中和	2038年前淘汰煤炭	政府＋市场
西班牙工人社会党(PSOE)	认可	支持	2050年前实现碳中和	2050年实现100％可再生能源发电	政府＋市场
葡萄牙社会党(PS)	认可	支持	2050年实现碳中和	放弃煤炭；2030年可再生能源占能源消费的47％	政府＋市场
挪威工党(AP)	认可	支持	2050年实现碳中和；2030年温室气体排放较1990年减少55％	发展碳捕捉、海上风能、氢能等	政府＋市场
丹麦社会民主党(S)	认可	支持	2030年温室气体排放较1990年减少70％	2030年将海上风能增加一倍	政府＋市场
