# Supplementary material
Source: ML conference proceedings conference paper supplement (https://openreview.net/forum?id=xg0fmtqh8d)
Supplement: supplementary_material [file 119_数字主权愿景下的欧盟数字治理改革.xlsx]

## Sheet: Sheet
	超国家机构能力弱	超国家机构能力强
一致性弱	停滞型路径	偏离型路径
一致性强	替代型路径	转换型路径
