# Supplementary material
Source: ML conference proceedings conference paper supplement (https://openreview.net/forum?id=xg0fmtqh8d)
Supplement: supplementary_material [file 120_中欧新能源汽车产业争端_现状、原因和前景.xlsx]

## Sheet: Sheet
排名	新能源轿车关注度排行	新能源汽车智能驾驶排行	新能源汽车口碑排行
1	比亚迪汉	魏牌摩卡DHT－PHEV	比亚迪驱逐舰05
2	上汽通用五菱宏光MINIEV	智己L7	小鹏P5
3	特斯拉Model3	欧拉芭蕾猫	比亚迪海豚
4	比亚迪秦PLUS	蔚来ET5	比亚迪汉
5	小鹏P7	理想L9	小鹏P7
6	比亚迪海豚	凯迪拉克LYRIQ锐歌	－
7	欧拉好猫	蔚来ET7	－
8	极氪ZEEKR001	蔚来ES7	－
9	小鹏P5	奔驰EQS－AMG	－
10	奇瑞新能源小蚂蚁	领克09新能源	－
