# Supplementary material
Source: ML conference proceedings conference paper supplement (https://openreview.net/forum?id=xg0fmtqh8d)
Supplement: supplementary_material [file 121_《数字市场法》_欧盟规制数字“守门人”的制度路径.xlsx]

## Sheet: Sheet
数据限制型义务	数据使用义务	“守门人”不得利用企业用户通过核心平台服务生成或提供的非公开数据与其竞争
	数据融合义务	“守门人”不得将由核心平台服务收集的个人数据与“守门人”提供的其他服务、第三方服务收集的个人数据任意融合，并交叉使用于“守门人”的其他核心平台服务或子平台业务
	数据处理义务	“守门人”不得因第三方服务使用其核心平台服务，便基于提供在线广告服务的目的，处理终端用户使用第三方服务所产生的个人数据
数据开放型义务	数据共享义务	“守门人”应企业用户和终端用户授权的第三方要求，应免费为其提供可实时接入和使用的数据
	互操作性义务	“守门人”应允许安装与其互操作的第三方应用程序，“守门人”应提供服务供应商和软件供应商免费有效的互操作协议，且保证其质量、水平与“守门人”自带的软件和硬件服务相一致；“守门人”应提供基于互操作性的接入权
	可携带性义务	“守门人”免费提供终端用户在平台活动中所产生的数据和用户自身提供的数据，同时提供免费的工具以确保实现有效的数据可携带性及连续、实时接入数据的权限
	促进多归属义务	“守门人”不得强制要求用户使用其核心平台服务；“守门人”不得以注册、订阅作为使用其核心平台服务的前置条件；保障用户举报“守门人”不合规行为的权利；“守门人”应允许终端用户卸载“守门人”预设应用、更改“守门人”操作系统、虚拟助手和浏览器默认设置
FRAND 接入义务	“守门人”必须基于公平、合理和非歧视条款，为提供在线搜索引擎的第三方企业提供终端用户在其引擎上生成的排名、查询、点击和查看等数据接入权限
	“守门人”必须对相关应用商店、在线搜索引擎和在线社交网络服务适用公平、合理、非歧视的企业用户一般性接入条件
