# Supplementary material
Source: ML conference proceedings conference paper supplement (https://openreview.net/forum?id=xg0fmtqh8d)
Supplement: supplementary_material [file 122_新时代中国外交之礼治根源——以全球文明倡议等四大外交概念为例.xlsx]

## Sheet: Sheet
时代	代表人物	内容	媒介	对象	目的
国家产生前a	所有人	击鼓献玉	神	所有人	人的幸福
西周	周公	封建制、宗法制、井田制(“尊尊”“亲亲”)	神和个人道德	贵族	封建统治
西汉	董仲舒	三纲五常(“尊尊”“亲亲”)	天	贵族＋	封建统治
北宋	朱熹	三纲五常b(“尊尊”“亲亲”)	理	所有人c	封建统治
