# Supplementary material
Source: ML conference proceedings conference paper supplement (https://openreview.net/forum?id=xg0fmtqh8d)
Supplement: supplementary_material [file 123_欧盟开放创新生态系统:理论、政策与启示_孙艳.xlsx]

## Sheet: Sheet
改革和优化监管环境	促进私营部门投资研发和创新活动	让开放创新对社会经济的影响最大化
1.建立科学咨询机制；2.从欧盟层面提供创新政策支持服务；3.确立决策中的创新原则，并建立法规实施效果的反馈机制；4.改进对创新投资的监管。	1.发挥欧洲战略投资基金对创新投资的推动作用；2.开发新的融资工具；3.建立泛欧风险投资母基金，扩大欧洲风险投资基金规模。	1.成立欧洲创新理事会；2.建立“卓越认证”研究计划储备库；3.通过“欧洲创新伙伴”计划促进欧盟及成员国社会、市场、产业向绿色化和数字化转型。
