# Supplementary material
Source: ML conference proceedings conference paper supplement (https://openreview.net/forum?id=xg0fmtqh8d)
Supplement: supplementary_material [file 124_社会大众如何看待生成式人工...幕文本的舆情主题与情感分析_王冲.xlsx]

## Sheet: Sheet
序号	1月		6月		9月
	关键词	权重	关键词	权重	关键词	权重
1	AI	0.203861	AI	0.173042	gpt	0.174144
2	抄袭	0.119239	失业	0.108769	提问	0.089425
3	人类	0.077901	焦虑	0.069841	孩子	0.085676
4	论文	0.063603	人类	0.067531	学习	0.063684
5	chatgpt	0.042311	孩子	0.063213	需要	0.060718
6	可以	0.038344	眨眼	0.051589	作业	0.054673
7	查重	0.034618	家长	0.050097	问题	0.048373
8	就是	0.033573	GPT	0.042024	老师	0.047675
9	老师	0.032811	贩卖	0.039873	机器	0.047066
10	图灵	0.032224	废话	0.038526	答案	0.042539
