# Supplementary material
Source: ML conference proceedings conference paper supplement (https://openreview.net/forum?id=xg0fmtqh8d)
Supplement: supplementary_material [file 125_地位知觉弹性下的俄欧能源安全互动博弈.xlsx]

## Sheet: Sheet
影响因素&#10;地位知觉性	主要变量		调节变量
	力量对比	社会语境	历史叙事惯性
相对知觉钝性	具有非对称优势强国	更易融入	容易达成地位和解
相对知觉锐性	具有非对称劣势弱国	格格不入	地位差多次被翻转
