# Supplementary material
Source: ML conference proceedings conference paper supplement (https://openreview.net/forum?id=xg0fmtqh8d)
Supplement: supplementary_material [file 126_复合制度主义:基于中阿合作论坛的实证研究.xlsx]

## Sheet: Sheet
论坛届次	合作文件	重要成果
第一届(2004年，开罗)	«中国外交部与阿盟秘书处新闻公报»	中阿建立平等、全面合作的新型伙伴关系；支持建立中东无核区；中国支持中东和平进程、土地换和平原则和阿拉伯和平倡议；阿方坚持一个中国原则
第二届(2006年，北京)	«关于举办“中阿合作论坛企业家大会”谅解备忘录»	促进国际关系民主化；推动建设和谐世界；谴责任何形式的恐怖主义；反对将恐怖主义与特定民族宗教挂钩
第三届(2008年，麦纳麦)	«中阿环境保护合作联合公报»、«阿盟秘书处与中国贸促会关于投资研讨会机制的谅解备忘录»	加强平等互信、全面合作、面向和平和可持续发展的新型伙伴关系；阿方支持北京奥运会；重申台湾是中国领土不可分割的一部分；反对“台湾当局”以任何名义和形式加入联合国等仅限主权国家参加的国际组织和会议；中方支持根据阿拉伯和平倡议建立独立的巴勒斯坦国
第四届(2010年，天津)	«天津宣言»	建立全面合作、共同发展的中阿战略合作关系；尊重和支持各国根据本国国情自主选择发展道路；反对任何形式的“台湾独立”；不同中国台湾建立官方关系和进行官方往来；支持台海两岸关系和平发展和中国和平统一大业；支持上海世博会
第五届(2012年，突尼斯)	/	提升中阿战略合作关系的水平；阿方支持台海两岸关系和平发展和中国和平统一大业；认为涉藏问题属于中国内政；反对宗教极端势力、民族分裂势力和恐怖主义势力从事反华分裂活动；双方支持在“两国方案”框架下；建立独立的巴勒斯坦国；打击索马里海域、亚丁湾海盗；支持中国与海合会开展战略对话
第六届(2014年，北京)	«北京宣言»、«中阿合作论坛2014年至2024年发展规划»	进一步深化“全面合作、共同发展”的战略合作关系；建立“1＋2＋3”合作框架；中方支持建立以1967年边界为基础、以东耶路撒冷为首都的、独立的、拥有完全主权的巴勒斯坦国；阿方赞赏“一带一路”建设
第七届(2016年，多哈)	/	阿方支持中国同相关国家根据双边协议和地区有关共识；通过友好磋商和谈判；和平解决领土和海洋争议问题；强调应尊重主权国家及«联合国海洋法公约»缔约国享有的自主选择争端解决方式的权利；强调阿拉伯国家与伊朗间的合作关系应遵循睦邻友好、不干涉内政；尊重国家独立、主权和领土完整的原则
