# Supplementary material
Source: ML conference proceedings conference paper supplement (https://openreview.net/forum?id=xg0fmtqh8d)
Supplement: supplementary_material [file 127_AIGC大模型测评综述:使能技术、安全隐患和应对_许志伟.xlsx]

## Sheet: Sheet
文献	代表性领域	新挑战
		可解释性	公平性	鲁棒性	安全性	隐私性
BloombergGPT [113]	金融				√	√
XuanYuan [114]	金融			√		√
Cornucopia [115]	金融			√	√	√
BBT-FinCorpus [116]	金融			√		√
LexiLaw [117]	政法		√	√	√	√
LaWGPT [118]	政法		√		√	√
Lawyer LLaMA [119]	政法		√		√	√
LEVEN [120]	政法		√		√	√
ChatGPT 医疗评估 [121]	医疗	√	√	√	√	√
ChatGPT 生育咨询 [122]	医疗	√		√	√	√
ChatGPT 遗传性分析 [123]	医疗	√	√	√
ChatGPT 行医执照考试 [124]	医疗	√	√		√	√
DoctorGLM [125]	医疗	√		√	√	√
BenTsao [126]	医疗	√		√	√	√
BianQue [127]	医疗	√		√	√	√
HuatuoGPT [128]	医疗	√				√
Med-PaLM2 [129]	医疗	√		√		√
MultiMedQA [130]	医疗				√	√
