# Supplementary material
Source: ML conference proceedings conference paper supplement (https://openreview.net/forum?id=xg0fmtqh8d)
Supplement: supplementary_material [file 128_中小企业国际规则新发展与中国因应_徐泉.xlsx]

## Sheet: Sheet
条款	RCEP	CPTPP	USMCA
合作条款	第14.3条重点提示贸易便利化、市场准入、电子商务等传统议题方面的合作	无	第25.2条重点提示基础设施、融资、促进代表人数不足群体等方面的合作
信息共享条款	第14.2条具体要求列举较少	第24.1条具体要求列举详尽	第25.3条具体要求列举详尽
中小企业委员会条款	第14.4条设立联络点，但未赋予其跨国监管职能	第24.2条列举中小企业委员会职能，并赋予跨国监管职能	第25.4条列举中小企业委员会职能，并赋予跨国监管职能
列举协议中有利于中小企业的条款	无	无	第25.6条列举原产地规则、政府采购、数字贸易等章节中有利于中小企业的条款
中小企业对话条款	无专门条款有关规定于合作条款体现	无专门条款有关规定于中小企业委员会条款体现	第25.5条明确定期召开中小企业对话的义务
争端解决条款	不适用	不适用	不适用
