# Supplementary material
Source: ML conference proceedings conference paper supplement (https://openreview.net/forum?id=xg0fmtqh8d)
Supplement: supplementary_material [file 129_2024年1—5月份全国固定资产投资增长4.0%_2024-06-17.xlsx]

## Sheet: Sheet
年度	月份	环比增速（%）
2023年	5月	0.86
	6月	-0.78
	7月	0.05
	8月	0.36
	9月	0.15
	10月	0.13
	11月	0.28
	12月	0.09
2024年	1月	0.20
	2月	-0.08
	3月	0.80
	4月	-0.29
	5月	-0.04
