# Supplementary material
Source: ML conference proceedings conference paper supplement (https://openreview.net/forum?id=xg0fmtqh8d)
Supplement: supplementary_material [file 130_2024年2月下旬流通领域重要生产资料市场价格变动情况_2024-03-04.xlsx]

## Sheet: Sheet
产品名称	单位	本期价格（元）	比上期价格涨跌（元）	涨跌幅（%）
一、黑色金属
螺纹钢（Φ20mm，HRB400E）	吨	3858.5	-51.2	-1.3
线材（Φ8-10mm，HPB300）	吨	4063.7	-54.6	-1.3
普通中板（20mm，Q235）	吨	4112.8	-31.2	-0.8
热轧普通板卷（4.75-11.5mm，Q235）	吨	4014.3	-41.8	-1.0
无缝钢管（219*6，20#）	吨	4694.5	-2.4	-0.1
角钢（5#）	吨	4134.1	-59.2	-1.4
二、有色金属
电解铜（1#）	吨	68880.7	578.2	0.8
铝锭（A00）	吨	18800.0	55.0	0.3
铅锭（1#）	吨	15750.0	-100.0	-0.6
锌锭（0#）	吨	20472.9	142.9	0.7
三、化工产品
硫酸（98%）	吨	245.1	17.3	7.6
烧碱（液碱，32%）	吨	789.4	7.3	0.9
甲醇（优等品）	吨	2359.7	-21.8	-0.9
纯苯（石油苯，工业级）	吨	8464.4	-212.6	-2.5
苯乙烯（一级品）	吨	9062.9	-165.4	-1.8
聚乙烯（LLDPE，熔融指数2薄膜料）	吨	8232.6	-24.6	-0.3
聚丙烯（拉丝料）	吨	7369.8	-31.9	-0.4
聚氯乙烯（SG5）	吨	5671.0	-0.9	0.0
顺丁胶（BR9000）	吨	12931.0	183.8	1.4
涤纶长丝（POY150D/48F）	吨	7892.9	9.6	0.1
四、石油天然气
液化天然气（LNG）	吨	3938.6	-83.4	-2.1
液化石油气（LPG）	吨	4744.1	-39.9	-0.8
汽油（95#国VI）	吨	9343.5	-49.1	-0.5
汽油（92#国VI）	吨	9040.5	-56.9	-0.6
柴油（0#国VI）	吨	7608.0	-25.5	-0.3
石蜡（58#半）	吨	7979.5	88.7	1.1
五、煤炭
无烟煤（洗中块）	吨	1080.7	37.4	3.6
普通混煤（4500大卡）	吨	722.9	18.8	2.7
山西大混（5000大卡）	吨	828.0	16.6	2.0
山西优混（5500大卡）	吨	938.0	16.9	1.8
大同混煤（5800大卡）	吨	989.1	17.5	1.8
焦煤（主焦煤）	吨	2325.0	-16.7	-0.7
焦炭（准一级冶金焦）	吨	2070.0	-76.2	-3.6
六、非金属建材
普通硅酸盐水泥（P.O 42.5袋装）	吨	369.7	-1.7	-0.5
普通硅酸盐水泥（P.O 42.5散装）	吨	319.7	0.6	0.2
浮法平板玻璃（4.8/5mm）	吨	2068.8	7.7	0.4
七、农产品（主要用于加工）
稻米（粳稻米）	吨	4078.1	1.1	0.0
小麦（国标三等）	吨	2819.0	36.0	1.3
玉米（黄玉米二等）	吨	2315.3	35.1	1.5
棉花（皮棉，白棉三级）	吨	16728.0	21.0	0.1
生猪（外三元）	千克	13.7	-0.3	-2.1
大豆（黄豆）	吨	4432.1	-63.8	-1.4
豆粕（粗蛋白含量≥43%）	吨	3329.7	-89.4	-2.6
花生（油料花生米）	吨	8416.7	0.0	0.0
八、农业生产资料
尿素（中小颗粒）	吨	2304.5	6.7	0.3
复合肥（硫酸钾复合肥，氮磷钾含量45%）	吨	3142.1	-19.0	-0.6
农药（草甘膦，95%原药）	吨	25650.0	0.0	0.0
九、林产品
天然橡胶（标准胶SCRWF）	吨	12971.4	293.6	2.3
纸浆（进口针叶浆）	吨	5910.9	54.1	0.9
瓦楞纸（AA级120g）	吨	2872.9	5.4	0.2
