# Supplementary material
Source: ML conference proceedings conference paper supplement (https://openreview.net/forum?id=xg0fmtqh8d)
Supplement: supplementary_material [file 132_2023年全国规模以上工业企业利润下降2.3%_2024-01-27.xlsx]

## Sheet: Sheet
分 组	营业收入利润率	每百元营业收入中的成本	每百元营业收入中的费用	每百元资产实现的营业收入	人均营业收入	资产负债率	产成品存货周转天数	应收账款平均回收期
	2023年(%)	2023年(元)	2023年(元)	2023年末(元)	2023年末(万元/人)	2023年末(%)	2023年末(天)	2023年末(天)
总计	5.76	84.76	8.56	82.4	181.5	57.1	19.3	60.6
其中：采矿业	20.22	64.63	9.70	46.3	148.4	57.2	13.0	46.9
制造业	5.00	85.30	8.79	95.0	174.8	56.4	21.6	62.0
电力、热力、燃气及水生产和供应业	5.70	89.82	5.69	43.9	354.2	60.2	0.9	54.4
其中：国有控股企业	6.16	83.57	6.71	62.1	299.2	57.1	11.8	47.1
其中：股份制企业	5.59	84.87	8.64	80.3	178.6	57.8	19.9	58.5
外商及港澳台商投资企业	6.60	84.55	8.71	91.8	188.3	53.5	18.6	71.6
其中：私营企业	4.80	85.93	9.15	106.2	138.1	59.7	23.4	61.8
