# Supplementary material
Source: ML conference proceedings conference paper supplement (https://openreview.net/forum?id=xg0fmtqh8d)
Supplement: supplementary_material [file 133_2023年全国规模以上文化及相关产业企业营业收入增长8.2%_2024-01-30.xlsx]

## Sheet: Sheet
	绝对值(亿元)	比上年增长(%)	所占比重(%)
一、营业收入	129515	8.2	100.0
其中：文化新业态[2]	52395	15.3	40.5
按产业类型分
文化制造业	40962	0.6	31.6
文化批发和零售业	20814	6.1	16.1
文化服务业	67739	14.1	52.3
按领域分
文化核心领域	83978	12.2	64.8
文化相关领域	45537	1.5	35.2
按行业类别分
新闻信息服务	17243	15.5	13.3
内容创作生产	28262	10.7	21.8
创意设计服务	21249	8.7	16.4
文化传播渠道	14797	11.9	11.4
文化投资运营	669	24.4	0.5
文化娱乐休闲服务	1758	63.2	1.4
文化辅助生产和中介服务	15468	0.4	11.9
文化装备生产	6282	-2.6	4.9
文化消费终端生产	23787	3.3	18.4
按区域分
东部地区	101223	8.7	78.2
中部地区	15394	3.6	11.9
西部地区	11688	10.0	9.0
东北地区	1210	5.4	0.9
二、利润总额	11566	30.9	—
三、资产总计（期末）	196200	7.6	—
