# Supplementary material
Source: ML conference proceedings conference paper supplement (https://openreview.net/forum?id=xg0fmtqh8d)
Supplement: supplementary_material [file 134_2023年农民工监测调查报告_2024-04-30.xlsx]

## Sheet: Sheet
地 区	2022年	2023年	增量	增速
按输出地分:
东部地区	10403	10484	81	0.8
中部地区	9852	9904	52	0.5
西部地区	8351	8367	16	0.2
东北地区	956	998	42	4.4
按输入地分:
在东部地区	15447	15277	-170	-1.1
在中部地区	6771	6982	211	3.1
在西部地区	6436	6552	116	1.8
在东北地区	843	872	29	3.4
在其他地区	65	70	5	7.7
