# Supplementary material
Source: ML conference proceedings conference paper supplement (https://openreview.net/forum?id=xg0fmtqh8d)
Supplement: supplementary_material [file 135_2023年全国规模以上工业企业利润下降2.3%_2024-01-27.xlsx]

## Sheet: Sheet
行业	营业收入		营业成本		利润总额
	金额(亿元)	比上年增长(%)	金额(亿元)	比上年增长(%)	金额(亿元)	比上年增长(%)
总计	1334390.8	1.1	1130986.0	1.2	76858.3	-2.3
煤炭开采和洗选业	34958.7	-13.1	22386.4	-7.2	7628.9	-25.3
石油和天然气开采业	11857.9	-5.9	6316.0	1.1	2984.7	-16.0
黑色金属矿采选业	4723.5	2.8	3681.0	0.2	554.5	6.7
有色金属矿采选业	3491.8	3.1	2234.9	1.1	785.6	8.1
非金属矿采选业	3621.2	-3.0	2550.0	-3.4	416.2	0.6
开采专业及辅助性活动	2604.5	6.6	2422.1	5.7	24.2	128.3
其他采矿业	17.5	80.4	13.0	71.1	-1.8	-400.0
农副食品加工业	54038.6	1.1	49955.7	1.3	1391.2	-11.0
食品制造业	20497.6	2.5	16012.3	1.9	1666.8	4.2
酒、饮料和精制茶制造业	15516.2	7.4	9828.1	4.3	3110.0	8.5
烟草制品业	13333.0	4.1	3931.4	2.8	1526.7	15.3
纺织业	22879.1	-1.6	20235.4	-1.9	839.5	5.9
纺织服装、服饰业	12104.7	-5.4	10177.3	-6.4	613.8	-3.4
皮革、毛皮、羽毛及其制品和制鞋业	7986.1	-5.8	6852.1	-6.4	444.1	2.0
木材加工和木、竹、藤、棕、草制品业	8624.6	-2.2	7673.8	-3.0	397.9	18.0
家具制造业	6555.7	-4.4	5380.5	-5.4	364.6	-6.6
造纸和纸制品业	13926.2	-2.4	12228.0	-3.1	508.4	4.4
印刷和记录媒介复制业	6576.9	-4.7	5457.4	-5.8	389.6	1.7
文教、工美、体育和娱乐用品制造业	12683.8	-1.5	10931.5	-1.8	624.3	-1.7
石油、煤炭及其他燃料加工业	60744.7	-1.0	52084.4	-2.3	449.5	26.9
化学原料和化学制品制造业	87925.8	-3.5	75804.5	-1.1	4694.2	-34.1
医药制造业	25205.7	-3.7	14401.6	-2.3	3473.0	-15.1
化学纤维制造业	10975.3	6.8	10142.2	5.6	270.7	43.8
橡胶和塑料制品业	28218.1	0.5	23616.5	-1.0	1691.3	14.6
非金属矿物制品业	55756.0	-7.7	46765.8	-7.1	3222.2	-23.9
黑色金属冶炼和压延加工业	83352.4	-2.2	79335.0	-2.8	564.8	157.3
有色金属冶炼和压延加工业	75585.9	4.6	70739.3	4.5	2930.5	28.0
金属制品业	45442.6	-0.7	39798.1	-1.3	1903.1	4.5
通用设备制造业	47072.2	2.8	37903.6	1.4	3427.8	10.3
专用设备制造业	36745.1	0.7	28458.4	-0.2	2878.0	-0.4
汽车制造业	100975.8	11.9	87626.9	12.5	5086.3	5.9
铁路、船舶、航空航天和其他运输设备制造业	13661.1	6.7	11403.6	5.6	893.8	22.0
电气机械和器材制造业	110059.9	9.6	93780.6	8.5	6334.5	15.7
计算机、通信和其他电子设备制造业	151067.8	-1.5	131357.5	-1.4	6411.3	-8.6
仪器仪表制造业	10112.2	4.0	7466.9	2.9	1049.9	2.3
其他制造业	1944.7	-2.6	1604.2	-2.4	102.7	-20.1
废弃资源综合利用业	11726.3	12.3	11141.9	12.8	222.4	-7.8
金属制品、机械和设备修理业	2078.5	10.4	1738.2	9.3	160.6	18.6
电力、热力生产和供应业	97718.3	4.6	88245.1	2.6	5488.4	71.9
燃气生产和供应业	17321.2	8.7	15786.7	9.2	890.8	9.1
水的生产和供应业	4704.0	4.4	3518.3	4.3	443.1	10.0
