# Supplementary material
Source: ML conference proceedings conference paper supplement (https://openreview.net/forum?id=xg0fmtqh8d)
Supplement: supplementary_material [file 136_2024年1月上旬流通领域重要生产资料市场价格变动情况_2024-01-14.xlsx]

## Sheet: Sheet
产品名称	单位	本期价格（元）	比上期价格涨跌（元）	涨跌幅（%）
一、黑色金属
螺纹钢（Φ20mm，HRB400E）	吨	3951.6	1.3	0.0
线材（Φ8-10mm，HPB300）	吨	4154.7	-8.8	-0.2
普通中板（20mm，Q235）	吨	4095.6	11.4	0.3
热轧普通板卷（4.75-11.5mm，Q235）	吨	4089.5	-3.8	-0.1
无缝钢管（219*6，20#）	吨	4593.8	12.3	0.3
角钢（5#）	吨	4213.2	-11.1	-0.3
二、有色金属
电解铜（1#）	吨	68695.0	-611.4	-0.9
铝锭（A00）	吨	19304.3	55.7	0.3
铅锭（1#）	吨	15817.9	253.6	1.6
锌锭（0#）	吨	21518.6	12.9	0.1
三、化工产品
硫酸（98%）	吨	256.7	-25.0	-8.9
烧碱（液碱，32%）	吨	769.1	-3.2	-0.4
甲醇（优等品）	吨	2313.7	-44.8	-1.9
纯苯（石油苯，工业级）	吨	7394.9	142.6	2.0
苯乙烯（一级品）	吨	8356.9	-127.6	-1.5
聚乙烯（LLDPE，熔融指数2薄膜料）	吨	8219.5	-52.9	-0.6
聚丙烯（拉丝料）	吨	7415.2	-97.7	-1.3
聚氯乙烯（SG5）	吨	5665.1	-128.5	-2.2
顺丁胶（BR9000）	吨	12088.1	28.6	0.2
涤纶长丝（POY150D/48F）	吨	7607.1	42.8	0.6
四、石油天然气
液化天然气（LNG）	吨	5596.4	-214.9	-3.7
液化石油气（LPG）	吨	5014.1	-72.1	-1.4
汽油（95#国VI）	吨	9225.9	84.2	0.9
汽油（92#国VI）	吨	8920.2	88.6	1.0
柴油（0#国VI）	吨	7700.6	-39.4	-0.5
石蜡（58#半）	吨	8220.0	-332.1	-3.9
五、煤炭
无烟煤（洗中块）	吨	1034.3	-53.1	-4.9
普通混煤（4500大卡）	吨	712.6	-8.3	-1.2
山西大混（5000大卡）	吨	821.9	-11.1	-1.3
山西优混（5500大卡）	吨	931.9	-11.0	-1.2
大同混煤（5800大卡）	吨	982.7	-11.6	-1.2
焦煤（主焦煤）	吨	2510.7	-64.3	-2.5
焦炭（准一级冶金焦）	吨	2312.9	-100.0	-4.1
六、非金属建材
普通硅酸盐水泥（P.O 42.5袋装）	吨	371.7	0.3	0.1
普通硅酸盐水泥（P.O 42.5散装）	吨	329.2	-5.0	-1.5
浮法平板玻璃（4.8/5mm）	吨	2029.0	12.4	0.6
七、农产品（主要用于加工）
稻米（粳稻米）	吨	4076.0	0.0	0.0
小麦（国标三等）	吨	2837.5	-51.1	-1.8
玉米（黄玉米二等）	吨	2403.6	-29.1	-1.2
棉花（皮棉，白棉三级）	吨	16000.5	125.1	0.8
生猪（外三元）	千克	13.9	-0.5	-3.5
大豆（黄豆）	吨	4703.7	-87.5	-1.8
豆粕（粗蛋白含量≥43%）	吨	3811.7	-99.6	-2.5
花生（油料花生米）	吨	8477.4	-72.6	-0.8
八、农业生产资料
尿素（中小颗粒）	吨	2357.8	-9.7	-0.4
复合肥（硫酸钾复合肥，氮磷钾含量45%）	吨	3177.8	0.0	0.0
农药（草甘膦，95%原药）	吨	26250.0	0.0	0.0
九、林产品
天然橡胶（标准胶SCRWF）	吨	12835.7	7.1	0.1
纸浆（进口针叶浆）	吨	5881.4	-11.5	-0.2
瓦楞纸（AA级120g）	吨	2904.4	-32.2	-1.1
