# Supplementary material
Source: ML conference proceedings conference paper supplement (https://openreview.net/forum?id=xg0fmtqh8d)
Supplement: supplementary_material [file 137_2023年农民工监测调查报告_2024-04-30.xlsx]

## Sheet: Sheet
年龄组	2019年	2020年	2021年	2022年	2023年
16-20岁	2.0	1.6	1.6	1.3	1.2
21-30岁	23.1	21.1	19.6	18.5	15.4
31-40岁	25.5	26.7	27.0	27.2	28.0
41-50岁	24.8	24.2	24.5	23.8	24.8
50岁以上	24.6	26.4	27.3	29.2	30.6
