# Supplementary material
Source: ML conference proceedings conference paper supplement (https://openreview.net/forum?id=xg0fmtqh8d)
Supplement: supplementary_material [file 138_2024年6月下旬流通领域重要生产资料市场价格变动情况_2024-07-04.xlsx]

## Sheet: Sheet
产品名称	单位	本期价格（元）	比上期价格涨跌（元）	涨跌幅（%）
一、黑色金属
螺纹钢（Φ20mm，HRB400E）	吨	3505.4	-83.7	-2.3
线材（Φ8—10mm，HPB300）	吨	3686.2	-81.0	-2.2
普通中板（20mm，Q235）	吨	3737.4	-79.0	-2.1
热轧普通板卷（4.75—11.5mm，Q235）	吨	3725.1	-43.5	-1.2
无缝钢管（219*6，20#）	吨	4443.1	-32.8	-0.7
角钢（5#）	吨	3785.0	-85.5	-2.2
二、有色金属
电解铜（1#）	吨	78178.3	-951.1	-1.2
铝锭（A00）	吨	20196.7	-348.3	-1.7
铅锭（1#）	吨	18837.5	159.4	0.9
锌锭（0#）	吨	23811.7	239.2	1.0
三、化工产品
硫酸（98%）	吨	357.6	15.2	4.4
烧碱（液碱，32%）	吨	827.9	1.0	0.1
甲醇（优等品）	吨	2361.2	-52.8	-2.2
纯苯（石油苯，工业级）	吨	9416.3	-62.5	-0.7
苯乙烯（一级品）	吨	9430.8	-129.8	-1.4
聚乙烯（LLDPE，熔融指数2薄膜料）	吨	8700.0	-7.3	-0.1
聚丙烯（拉丝料）	吨	7695.3	3.6	0.0
聚氯乙烯（SG5）	吨	5804.5	-110.1	-1.9
顺丁胶（BR9000）	吨	15098.6	-147.2	-1.0
涤纶长丝（POY150D/48F）	吨	7975.0	125.0	1.6
四、石油天然气
液化天然气（LNG）	吨	4335.0	13.3	0.3
液化石油气（LPG）	吨	4949.7	-28.6	-0.6
汽油（95#国VI）	吨	9359.6	-7.7	-0.1
汽油（92#国VI）	吨	9075.4	-6.8	-0.1
柴油（0#国VI）	吨	7729.2	-3.6	0.0
石蜡（58#半）	吨	7544.6	4.6	0.1
五、煤炭
无烟煤（洗中块）	吨	1185.0	-69.4	-5.5
普通混煤（4500大卡）	吨	666.4	-10.6	-1.6
山西大混（5000大卡）	吨	765.1	-11.8	-1.5
山西优混（5500大卡）	吨	865.1	-11.8	-1.3
大同混煤（5800大卡）	吨	912.1	-12.7	-1.4
焦煤（主焦煤）	吨	1950.0	0.0	0.0
焦炭（准一级冶金焦）	吨	1887.9	13.5	0.7
六、非金属建材
普通硅酸盐水泥（P.O42.5袋装）	吨	380.8	-3.5	-0.9
普通硅酸盐水泥（P.O42.5散装）	吨	338.0	-0.7	-0.2
浮法平板玻璃（4.8/5mm）	吨	1650.2	-39.8	-2.4
七、农产品（主要用于加工）	吨
稻米（粳稻米）	吨	4078.7	0.2	0.0
小麦（国标三等）	吨	2470.5	24.7	1.0
玉米（黄玉米二等）	吨	2383.6	16.2	0.7
棉花（皮棉，白棉三级）	吨	15409.3	-110.0	-0.7
生猪（外三元）	千克	17.6	-1.0	-5.4
大豆（黄豆）	吨	4518.8	-30.5	-0.7
豆粕（粗蛋白含量≥43%）	吨	3247.0	-77.4	-2.3
花生（油料花生米）	吨	8440.3	-42.0	-0.5
八、农业生产资料
尿素（中小颗粒）	吨	2352.5	3.5	0.1
复合肥（硫酸钾复合肥，氮磷钾含量45%）	吨	3052.8	0.0	0.0
农药（草甘膦，95%原药）	吨	25350.0	-481.3	-1.9
九、林产品
天然橡胶（标准胶SCRWF）	吨	14420.8	-195.9	-1.3
纸浆（进口针叶浆）	吨	6335.3	-8.0	-0.1
瓦楞纸（AA级120g）	吨	2630.6	7.9	0.3
