# Supplementary material
Source: ML conference proceedings conference paper supplement (https://openreview.net/forum?id=xg0fmtqh8d)
Supplement: supplementary_material [file 139_2024年4月中旬流通领域重要生产资料市场价格变动情况_2024-04-24.xlsx]

## Sheet: Sheet
产品名称	单位	本期价格（元）	比上期价格涨跌（元）	涨跌幅（%）
一、黑色金属
螺纹钢（Φ20mm，HRB400E）	吨	3621.0	130.9	3.8
线材（Φ8-10mm，HPB300）	吨	3799.0	125.3	3.4
普通中板（20mm，Q235）	吨	3873.0	42.9	1.1
热轧普通板卷（4.75-11.5mm，Q235）	吨	3809.0	65.9	1.8
无缝钢管（219*6，20#）	吨	4487.0	-49.0	-1.1
角钢（5#）	吨	3925.0	43.9	1.1
二、有色金属
电解铜（1#）	吨	76773.6	2440.3	3.3
铝锭（A00）	吨	20365.7	509.0	2.6
铅锭（1#）	吨	16496.4	225.6	1.4
锌锭（0#）	吨	22510.0	1068.3	5.0
三、化工产品
硫酸（98%）	吨	364.9	-2.2	-0.6
烧碱（液碱，32%）	吨	785.7	-43.1	-5.2
甲醇（优等品）	吨	2434.5	52.8	2.2
纯苯（石油苯，工业级）	吨	8769.3	68.3	0.8
苯乙烯（一级品）	吨	9654.8	52.2	0.5
聚乙烯（LLDPE，熔融指数2薄膜料）	吨	8435.7	80.0	1.0
聚丙烯（拉丝料）	吨	7553.6	31.5	0.4
聚氯乙烯（SG5）	吨	5616.8	5.5	0.1
顺丁胶（BR9000）	吨	13319.0	-148.9	-1.1
涤纶长丝（POY150D/48F）	吨	7725.0	-28.6	-0.4
四、石油天然气
液化天然气（LNG）	吨	3994.8	59.8	1.5
液化石油气（LPG）	吨	4956.4	136.3	2.8
汽油（95#国VI）	吨	9810.7	183.7	1.9
汽油（92#国VI）	吨	9521.7	180.7	1.9
柴油（0#国VI）	吨	7970.2	51.4	0.6
石蜡（58#半）	吨	8470.0	13.9	0.2
五、煤炭	吨
无烟煤（洗中块）		1053.3	52.8	5.3
普通混煤（4500大卡）	吨	628.9	3.2	0.5
山西大混（5000大卡）	吨	723.6	3.6	0.5
山西优混（5500大卡）	吨	823.6	3.6	0.4
大同混煤（5800大卡）	吨	868.3	3.8	0.4
焦煤（主焦煤）	吨	1860.7	57.1	3.2
焦炭（准一级冶金焦）	吨	1655.8	-28.5	-1.7
六、非金属建材
普通硅酸盐水泥（P.O 42.5袋装）	吨	357.4	4.5	1.3
普通硅酸盐水泥（P.O 42.5散装）	吨	309.6	2.0	0.7
浮法平板玻璃（4.8/5mm）	吨	1729.7	-4.3	-0.2
七、农产品（主要用于加工）
稻米（粳稻米）	吨	4086.0	3.0	0.1
小麦（国标三等）	吨	2689.7	-41.0	-1.5
玉米（黄玉米二等）	吨	2292.5	-13.6	-0.6
棉花（皮棉，白棉三级）	吨	16640.6	-78.0	-0.5
生猪（外三元）	千克	15.1	-0.2	-1.3
大豆（黄豆）	吨	4495.1	-30.9	-0.7
豆粕（粗蛋白含量≥43%）	吨	3331.6	-65.5	-1.9
花生（油料花生米）	吨	8750.0	58.3	0.7
八、农业生产资料
尿素（中小颗粒）	吨	2188.3	54.2	2.5
复合肥（硫酸钾复合肥，氮磷钾含量45%）	吨	3034.9	-20.7	-0.7
农药（草甘膦，95%原药）	吨	26228.6	421.5	1.6
九、林产品
天然橡胶（标准胶SCRWF）	吨	13739.3	-59.5	-0.4
纸浆（进口针叶浆）	吨	6362.5	159.3	2.6
瓦楞纸（AA级120g）	吨	2713.3	-18.6	-0.7
