# Supplementary material
Source: ML conference proceedings conference paper supplement (https://openreview.net/forum?id=xg0fmtqh8d)
Supplement: supplementary_material [file 141_2024年7月份社会消费品零售总额增长2.7%_2024-08-15.xlsx]

## Sheet: Sheet
指 标	7月		1—7月
	绝对量（亿元）	同比增长（%）	绝对量（亿元）	同比增长（%）
社会消费品零售总额	37757	2.7	273726	3.5
其中：除汽车以外的消费品零售额	33959	3.6	246990	4.0
其中：限额以上单位消费品零售额	14283	-0.1	105321	2.7
其中：实物商品网上零售额	-	-	70093	8.7
按经营地分
城镇	32691	2.4	237250	3.4
乡村	5066	4.6	36476	4.5
按消费类型分
餐饮收入	4403	3.0	30647	7.1
其中：限额以上单位餐饮收入	1217	-0.7	8418	4.6
商品零售额	33354	2.7	243079	3.1
其中：限额以上单位商品零售额	13066	0.0	96903	2.5
其中：粮油、食品类	1619	9.9	11991	9.6
饮料类	268	6.1	1834	5.6
烟酒类	410	-0.1	3469	8.7
服装、鞋帽、针纺织品类	936	-5.2	8033	0.5
化妆品类	245	-6.1	2410	0.3
金银珠宝类	200	-10.4	1929	-1.0
日用品类	594	2.1	4515	2.3
体育、娱乐用品类	105	10.7	774	11.1
家用电器和音像器材类	730	-2.4	5221	2.3
中西药品类	548	5.8	4078	4.6
文化办公用品类	312	-2.4	2154	-5.3
家具类	129	-1.1	851	2.0
通讯器材类	521	12.7	4211	11.4
石油及制品类	2035	1.6	14041	3.8
汽车类	3798	-4.9	26736	-1.7
建筑及装潢材料类 注	130	-2.1	911	-1.3
