# Supplementary material
Source: ML conference proceedings conference paper supplement (https://openreview.net/forum?id=xg0fmtqh8d)
Supplement: supplementary_material [file 143_2024年1月份居民消费价格环比上涨0.3%_2024-02-08.xlsx]

## Sheet: 1月CPI
	环比涨跌幅	同比涨跌幅
	（%）	（%）
居民消费价格	0.3	-0.8
其中：城市	0.3	-0.8
农村	0.2	-0.8
其中：食品	0.4	-5.9
非食品	0.2	0.4
其中：消费品	0.2	-1.7
服务	0.4	0.5
其中：不包括食品和能源	0.3	0.4
按类别分
一、食品烟酒	0.3	-3.6
粮 食	0	0.5
食 用 油	-1	-4.9
鲜 菜	3.8	-12.7
畜 肉 类	-0.5	-11.6
其中：猪 肉	-0.2	-17.3
牛 肉	-0.9	-7.7
羊 肉	-0.3	-5.9
水 产 品	2.6	-3.4
蛋 类	-1.5	-6.4
奶 类	-0.5	-0.8
鲜 果	-0.5	-9.1
卷 烟	0.2	1.3
酒 类	-0.3	-0.1
二、衣着	-0.3	1.6
服 装	-0.3	1.7
鞋 类	-0.2	1.3
三、居住	0	0.3
租赁房房租	-0.1	0.2
水电燃料	0.1	0.3
四、生活用品及服务	1	1
家用器具	0.6	-0.2
家庭服务	2.7	2
五、交通通信	0.1	-2.4
交通工具	-0.1	-5.6
交通工具用燃料	-1	-0.1
交通工具使用和维修	0.1	-1.2
通信工具	-0.3	-1.7
通信服务	0	-0.3
邮递服务	0.1	-0.3
六、教育文化娱乐	0.7	1.3
教育服务	0	1.7
旅 游	4.2	1.8
七、医疗保健	0.1	1.3
中 药	0.1	6.1
西 药	-0.1	-0.2
医疗服务	0.2	1.3
八、其他用品及服务	1.1	2.9
