# Supplementary material
Source: ML conference proceedings conference paper supplement (https://openreview.net/forum?id=xg0fmtqh8d)
Supplement: supplementary_material [file 145_2024年6月份居民消费价格同比上涨0.2%_2024-07-10.xlsx]

## Sheet: Sheet
	环比涨跌幅（%）	同比涨跌幅（%）	1—6月同比涨跌幅（%）
居民消费价格	-0.2	0.2	0.1
其中：城市	-0.2	0.2	0.1
农村	-0.2	0.4	0.2
其中：食品	-0.6	-2.1	-2.7
非食品	-0.2	0.8	0.8
其中：消费品	-0.4	-0.1	-0.4
服务	0.0	0.7	0.9
其中：不包括食品和能源	-0.1	0.6	0.7
按类别分
一、食品烟酒	-0.4	-1.1	-1.4
粮 食	-0.1	0.4	0.5
食 用 油	0.0	-4.2	-5.1
鲜 菜	-7.3	-7.3	-2.7
畜 肉 类	4.5	3.5	-3.6
其中：猪 肉	11.4	18.1	0.0
牛 肉	-2.5	-13.4	-9.9
羊 肉	-0.9	-7.1	-6.2
水 产 品	-0.2	1.2	0.6
蛋 类	1.5	-3.9	-7.1
奶 类	-0.2	-1.8	-1.4
鲜 果	-3.8	-8.7	-7.8
卷 烟	0.0	1.1	1.2
酒 类	-0.6	-1.6	-1.1
二、衣着	-0.2	1.5	1.6
服 装	-0.2	1.8	1.7
鞋 类	-0.4	0.5	0.9
三、居住	0.1	0.2	0.2
租赁房房租	0.1	-0.2	0.0
水电燃料	0.0	0.9	0.6
四、生活用品及服务	-0.4	0.9	0.9
家用器具	-1.2	-1.3	-0.6
家庭服务	0.1	1.7	1.8
五、交通通信	-0.6	-0.3	-0.7
交通工具	-1.0	-5.3	-5.0
交通工具用燃料	-2.0	5.6	3.6
交通工具使用和维修	0.0	0.4	0.5
通信工具	0.8	-1.5	-2.2
通信服务	0.0	-0.2	-0.3
邮递服务	0.0	-0.5	-0.3
六、教育文化娱乐	-0.2	1.7	2.0
教育服务	0.0	1.8	1.7
旅 游	-0.8	3.7	7.0
七、医疗保健	0.1	1.5	1.4
中 药	0.0	4.0	5.3
西 药	0.0	-0.9	-0.6
医疗服务	0.1	1.9	1.7
八、其他用品及服务	-0.2	4.0	3.3
