# Supplementary material
Source: ML conference proceedings conference paper supplement (https://openreview.net/forum?id=xg0fmtqh8d)
Supplement: supplementary_material [file 146_2024年6月中国采购经理指数运行情况_2024-06-30.xlsx]

## Sheet: Sheet
	新出口订单	进口	采购量	主要原材料购进价格	出厂价格	产成品库存	在手订单	生产经营活动预期
2023年6月	46.4	47.0	48.9	45.0	43.9	46.1	45.2	53.4
2023年7月	46.3	46.8	49.5	52.4	48.6	46.3	45.4	55.1
2023年8月	46.7	48.9	50.5	56.5	52.0	47.2	45.9	55.6
2023年9月	47.8	47.6	50.7	59.4	53.5	46.7	45.3	55.5
2023年10月	46.8	47.5	49.8	52.6	47.7	48.5	44.2	55.6
2023年11月	46.3	47.3	49.6	50.7	48.2	48.2	44.4	55.8
2023年12月	45.8	46.4	49.0	51.5	47.7	47.8	44.5	55.9
2024年1月	47.2	46.7	49.2	50.4	47.0	49.4	44.3	54.0
2024年2月	46.3	46.4	48.0	50.1	48.1	47.9	43.5	54.2
2024年3月	51.3	50.4	52.7	50.5	47.4	48.9	47.6	55.6
2024年4月	50.6	48.1	50.5	54.0	49.1	47.3	45.6	55.2
2024年5月	48.3	46.8	49.3	56.9	50.4	46.5	45.3	54.3
2024年6月	48.3	46.9	48.1	51.7	47.9	48.3	45.0	54.4
