# Supplementary material
Source: ML conference proceedings conference paper supplement (https://openreview.net/forum?id=xg0fmtqh8d)
Supplement: supplementary_material [file 147_2024年8月份居民消费价格同比上涨0.6%_2024-09-09.xlsx]

## Sheet: Sheet
	环比涨跌幅（%）	同比涨跌幅（%）	1—8月同比涨跌幅（%）
居民消费价格	0.4	0.6	0.2
其中：城市	0.3	0.6	0.2
农村	0.4	0.8	0.3
其中：食品	3.4	2.8	-1.7
非食品	-0.3	0.2	0.7
其中：消费品	0.7	0.7	-0.1
服务	-0.1	0.5	0.8
其中：不包括食品和能源	-0.2	0.3	0.6
按类别分
一、食品烟酒	2.2	2.1	-0.8
粮 食	-0.1	-0.1	0.3
食 用 油	0.1	-4.1	-4.8
鲜 菜	18.1	21.8	0.9
畜 肉 类	3.6	3.8	-1.7
其中:猪 肉	7.3	16.1	4.4
牛 肉	0.0	-12.9	-10.6
羊 肉	-0.5	-6.3	-6.3
水 产 品	0.2	1.7	0.8
蛋 类	2.8	-3.5	-5.7
奶 类	0.0	-1.7	-1.5
鲜 果	3.8	4.1	-6.0
卷 烟	0.0	0.9	1.1
酒 类	-0.2	-1.5	-1.2
二、衣着	-0.2	1.4	1.5
服 装	-0.2	1.7	1.7
鞋 类	-0.3	0.1	0.7
三、居住	0.0	0.0	0.2
租赁房房租	0.0	-0.3	-0.1
水电燃料	0.0	0.6	0.6
四、生活用品及服务	-0.7	0.2	0.8
家用器具	-0.7	-1.8	-0.9
家庭服务	0.1	1.6	1.8
五、交通通信	-1.1	-2.7	-1.0
交通工具	-0.3	-5.5	-5.1
交通工具用燃料	-2.9	-2.7	2.9
交通工具使用和维修	0.0	0.5	0.5
通信工具	-0.8	-2.1	-2.2
通信服务	0.0	0.0	-0.2
邮递服务	-0.1	-0.6	-0.4
六、教育文化娱乐	-0.1	1.3	1.9
教育服务	0.0	1.7	1.7
旅 游	-0.7	0.9	5.7
七、医疗保健	0.0	1.3	1.4
中 药	0.0	2.1	4.5
西 药	-0.1	-1.0	-0.7
医疗服务	0.0	1.9	1.8
八、其他用品及服务	-0.6	3.4	3.4
