# Supplementary material
Source: ML conference proceedings conference paper supplement (https://openreview.net/forum?id=xg0fmtqh8d)
Supplement: supplementary_material [file 148_2024年1—2月份社会消费品零售总额增长5.5%_2024-03-18.xlsx]

## Sheet: Sheet
指标	1—2月
	绝对量（亿元）	同比增长（%）
社会消费品零售总额	81307	5.5
其中：除汽车以外的消费品零售额	74194	5.2
其中：限额以上单位消费品零售额	29920	6.7
其中：实物商品网上零售额	18206	14.4
按经营地分
城镇	70437	5.5
乡村	10870	5.8
按消费类型分
餐饮收入	9481	12.5
其中：限额以上单位餐饮收入	2374	12.4
商品零售	71826	4.6
其中:限额以上单位商品零售	27545	6.2
粮油、食品类	3693	9.0
饮料类	541	6.9
烟酒类	1265	13.7
服装、鞋帽、针纺织品类	2521	1.9
化妆品类	678	4.0
金银珠宝类	708	5.0
日用品类	1283	-0.7
体育、娱乐用品类	193	11.3
家用电器和音像器材类	1310	5.7
中西药品类	1136	2.0
文化办公用品类	543	-8.8
家具类	220	4.6
通讯器材类	1215	16.2
石油及制品类	3935	5.0
汽车类	7112	8.7
建筑及装潢材料类	239	2.1
