# Supplementary material
Source: ML conference proceedings conference paper supplement (https://openreview.net/forum?id=xg0fmtqh8d)
Supplement: supplementary_material [file 149_2023年经济发展新动能指数增长19.5%_2024-08-31.xlsx]

## Sheet: Sheet
分类指数	权重	序号	指标
经济活力指数	0.2	1	新设经营主体数量
		2	高新技术企业数
		3	快递业务量
		4	高技术产业投资增速
创新驱动指数	0.3	1	R&D经费支出
		2	每万人R&D人员全时当量
		3	每万人口高价值发明专利拥有量
		4	技术市场成交合同金额
		5	专精特新“小巨人”企业数量
网络经济指数	0.3	1	移动互联网接入流量
		2	5G基站数
		3	跨境电子商务出口额
		4	实物商品网上零售额
转型升级指数	0.2	1	战略性新兴产业增加值
		2	有电子商务交易活动的企业比重
		3	“新三样”出口额
		4	非化石能源消费量
		5	数字产品相关行业增加值
