# Supplementary material
Source: ML conference proceedings conference paper supplement (https://openreview.net/forum?id=xg0fmtqh8d)
Supplement: supplementary_material [file 150_2024年5月份工业生产者出厂价格同比降幅明显收窄环比上涨_2024-06-12.xlsx]

## Sheet: Sheet1
	环比涨跌幅	同比涨跌幅	1—5月同比
	（%）	（%）	涨跌幅（%）
一、工业生产者出厂价格	0.2	-1.4	-2.4
生产资料	0.4	-1.6	-2.9
采掘	0.2	-1.2	-4.7
原材料	0.9	0.5	-2.0
加工	0.1	-2.6	-3.2
生活资料	-0.1	-0.8	-0.9
食品	-0.2	-0.7	-0.9
衣着	0.1	0.4	0.3
一般日用品	0.0	0.0	0.0
耐用消费品	-0.3	-1.8	-1.9
二、工业生产者购进价格	0.3	-1.7	-3.0
燃料、动力类	0.2	-2.1	-4.9
黑色金属材料类	0.2	-3.1	-2.8
有色金属材料及电线类	3.6	8.1	2.8
化工原料类	0.1	-2.9	-4.8
木材及纸浆类	0.2	-1.8	-4.2
建筑材料及非金属类	-0.5	-8.4	-7.5
其它工业原材料及半成品类	0.0	-1.5	-1.8
农副产品类	-0.4	-4.6	-5.4
纺织原料类	-0.1	0.3	0.2
三、主要行业出厂价格
煤炭开采和洗选业	0.5	-9.0	-13.9
石油和天然气开采业	-2.1	9.4	6.5
黑色金属矿采选业	-0.1	4.6	8.0
有色金属矿采选业	4.4	13.5	7.2
非金属矿采选业	0.2	-2.0	-2.1
农副食品加工业	-0.5	-3.4	-3.8
食品制造业	-0.2	-1.1	-1.0
酒、饮料和精制茶制造业	-0.1	-0.1	0.3
烟草制品业	0.0	1.0	0.8
纺织业	-0.1	-0.6	-0.8
纺织服装、服饰业	0.2	0.6	0.4
木材加工和木、竹、藤、棕、草制品业	-0.2	-1.3	-1.1
造纸和纸制品业	-0.7	-3.9	-4.8
印刷和记录媒介复制业	-0.1	-2.0	-1.1
石油、煤炭及其他燃料加工业	1.0	3.4	-2.3
化学原料和化学制品制造业	0.1	-3.4	-5.6
医药制造业	-0.1	-0.7	-0.6
化学纤维制造业	-0.2	-0.3	0.4
橡胶和塑料制品业	-0.2	-2.4	-2.7
非金属矿物制品业	-0.8	-8.8	-8.3
黑色金属冶炼和压延加工业	0.8	-3.7	-5.5
有色金属冶炼和压延加工业	3.9	8.9	2.7
金属制品业	-0.1	-1.6	-1.8
通用设备制造业	-0.1	-0.8	-0.6
汽车制造业	-0.3	-2.0	-1.7
铁路、船舶、航空航天和其他运输设备制造业	0.1	0.0	-0.3
计算机、通信和其他电子设备制造业	-0.2	-1.9	-2.3
电力、热力生产和供应业	0.4	-1.8	-1.7
燃气生产和供应业	-1.4	-0.8	-1.4
水的生产和供应业	0.5	1.1	0.9
