# Supplementary material
Source: ML conference proceedings conference paper supplement (https://openreview.net/forum?id=xg0fmtqh8d)
Supplement: supplementary_material [file 151_2023年全国固定资产投资增长3.0%_2024-01-17.xlsx]

## Sheet: Sheet
指 标	比上年增长（%）
固定资产投资(不含农户)	3.0
其中：国有控股	6.4
其中：民间投资	-0.4
按构成分
建筑安装工程	2.1
设备工器具购置	6.6
其他费用	3.1
分产业
第一产业	-0.1
第二产业	9.0
第三产业	0.4
分行业
农林牧渔业	1.2
采矿业	2.1
制造业	6.5
其中：农副食品加工业	7.7
食品制造业	12.5
纺织业	-0.4
化学原料和化学制品制造业	13.4
医药制造业	1.8
有色金属冶炼和压延加工业	12.5
金属制品业	3.5
通用设备制造业	4.8
专用设备制造业	10.4
汽车制造业	19.4
铁路、船舶、航空航天和其他运输设备制造业	3.1
电气机械和器材制造业	32.2
计算机、通信和其他电子设备制造业	9.3
电力、热力、燃气及水生产和供应业	23.0
交通运输、仓储和邮政业	10.5
其中：铁路运输业	25.2
道路运输业	-0.7
水利、环境和公共设施管理业	0.1
其中：水利管理业	5.2
公共设施管理业	-0.8
教育	2.8
卫生和社会工作	-3.8
文化、体育和娱乐业	2.6
分注册类型
其中：内资企业	3.2
港澳台商投资企业	-2.7
外商投资企业	0.6
