# Supplementary material
Source: ML conference proceedings conference paper supplement (https://openreview.net/forum?id=xg0fmtqh8d)
Supplement: supplementary_material [file 152_2024年1—8月份全国规模以上工业企业利润增长0.5%_2024-09-27.xlsx]

## Sheet: Sheet
分 组	营业收入		营业成本		利润总额
	金额(亿元)	同比增长(%)	金额(亿元)	同比增长(%)	金额(亿元)	同比增长(%)
总计	871041.6	2.4	743769.2	2.6	46527.3	0.5
其中：采矿业	38686.3	-2.8	25407.6	-0.7	8132.8	-9.2
制造业	750055.4	2.5	644831.3	2.7	32967.2	1.1
电力、热力、燃气及水生产和供应业	82299.9	4.0	73530.2	3.6	5427.3	14.7
其中：国有控股企业	240306.6	1.4	200959.4	2.0	15490.6	-1.3
其中：股份制企业	693252.8	3.1	593755.1	3.5	34430.3	-1.3
外商及港澳台投资企业	171964.5	0.1	145090.1	-0.2	11777.0	6.9
其中:私营企业	319847.3	2.9	277241.5	3.0	12648.3	2.6
