# Supplementary material
Source: ML conference proceedings conference paper supplement (https://openreview.net/forum?id=xg0fmtqh8d)
Supplement: supplementary_material [file 153_2024年2月上旬流通领域重要生产资料市场价格变动情况_2024-02-14.xlsx]

## Sheet: Sheet
产品名称	单位	本期价格（元）	比上期价格涨跌（元）	涨跌幅（%）
一、黑色金属
螺纹钢（Φ20mm，HRB400E）	吨	3910.6	-14.5	-0.4
线材（Φ8-10mm，HPB300）	吨	4120.4	-13.0	-0.3
普通中板（20mm，Q235）	吨	4141.6	16.1	0.4
热轧普通板卷（4.75-11.5mm，Q235）	吨	4051.7	-22.7	-0.6
无缝钢管（219*6，20#）	吨	4696.9	20.0	0.4
角钢（5#）	吨	4182.4	4.4	0.1
二、有色金属
电解铜（1#）	吨	68821.7	236.7	0.3
铝锭（A00）	吨	18850.0	-105.0	-0.6
铅锭（1#）	吨	16000.0	-228.1	-1.4
锌锭（0#）	吨	20780.0	-437.5	-2.1
三、化工产品
硫酸（98%）	吨	219.8	-8.7	-3.8
烧碱（液碱，32%）	吨	788.1	-1.9	-0.2
甲醇（优等品）	吨	2375.8	7.7	0.3
纯苯（石油苯，工业级）	吨	8219.0	191.7	2.4
苯乙烯（一级品）	吨	8660.8	-97.5	-1.1
聚乙烯（LLDPE，熔融指数2薄膜料）	吨	8216.3	-81.8	-1.0
聚丙烯（拉丝料）	吨	7312.9	-56.9	-0.8
聚氯乙烯（SG5）	吨	5650.7	-26.5	-0.5
顺丁胶（BR9000）	吨	12279.2	164.6	1.4
涤纶长丝（POY150D/48F）	吨	7725.0	43.7	0.6
四、石油天然气
液化天然气（LNG）	吨	4722.0	-232.8	-4.7
液化石油气（LPG）	吨	4924.1	171.0	3.6
汽油（95#国VI）	吨	9333.2	81.8	0.9
汽油（92#国VI）	吨	9031.7	86.3	1.0
柴油（0#国VI）	吨	7658.4	16.9	0.2
石蜡（58#半）	吨	7897.8	-322.2	-3.9
五、煤炭
无烟煤（洗中块）	吨	995.0	0.0	0.0
普通混煤（4500大卡）	吨	692.5	-3.8	-0.5
山西大混（5000大卡）	吨	797.5	-3.3	-0.4
山西优混（5500大卡）	吨	907.5	-3.3	-0.4
大同混煤（5800大卡）	吨	957.0	-3.4	-0.4
焦煤（主焦煤）	吨	2375.0	0.0	0.0
焦炭（准一级冶金焦）	吨	2212.9	0.0	0.0
六、非金属建材
普通硅酸盐水泥（P.O 42.5袋装）	吨	371.4	0.8	0.2
普通硅酸盐水泥（P.O 42.5散装）	吨	320.6	-0.4	-0.1
浮法平板玻璃（4.8/5mm）	吨	2051.1	6.0	0.3
七、农产品（主要用于加工）
稻米（粳稻米）	吨	4075.0	0.7	0.0
小麦（国标三等）	吨	2749.8	12.3	0.4
玉米（黄玉米二等）	吨	2275.4	2.8	0.1
棉花（皮棉，白棉三级）	吨	16492.0	25.9	0.2
生猪（外三元）	千克	15.2	0.2	1.3
大豆（黄豆）	吨	4464.9	-37.5	-0.8
豆粕（粗蛋白含量≥43%）	吨	3404.1	-29.4	-0.9
花生（油料花生米）	吨	8416.7	0.0	0.0
八、农业生产资料
尿素（中小颗粒）	吨	2244.0	3.6	0.2
复合肥（硫酸钾复合肥，氮磷钾含量45%）	吨	3161.1	-2.8	-0.1
农药（草甘膦，95%原药）	吨	25650.0	-262.5	-1.0
九、林产品
天然橡胶（标准胶SCRWF）	吨	12477.1	-231.2	-1.8
纸浆（进口针叶浆）	吨	5823.4	-10.0	-0.2
瓦楞纸（AA级120g）	吨	2867.5	9.1	0.3
