# Supplementary material
Source: ML conference proceedings conference paper supplement (https://openreview.net/forum?id=xg0fmtqh8d)
Supplement: supplementary_material [file 154_2024年5月份规模以上工业增加值增长5.6%_2024-06-17.xlsx]

## Sheet: 表
指标	5月		1—5月
	绝对量	同比增长（%）	绝对量	同比增长（%）
规模以上工业增加值	…	5.6	…	6.2
分三大门类
采矿业	…	3.6	…	2
制造业	…	6	…	6.7
其中：高技术制造业	…	10	…	8.7
电力、热力、燃气及水生产和供应业	…	4.3	…	6.2
分经济类型
其中：国有控股企业	…	3.6	…	4.9
其中：股份制企业	…	6.4	…	6.6
外商及港澳台投资企业	…	2.5	…	4.6
其中：私营企业	…	5.9	…	5.7
主要行业增加值
煤炭开采和洗选业	…	4.4	…	1.3
石油和天然气开采业	…	1.6	…	2
农副食品加工业	…	-0.9	…	2.1
食品制造业	…	3.5	…	5.5
酒、饮料和精制茶制造业	…	5.1	…	5.8
纺织业	…	5.3	…	5.3
化学原料和化学制品制造业	…	12.7	…	10.7
医药制造业	…	4	…	1.1
橡胶和塑料制品业	…	8.6	…	9.8
非金属矿物制品业	…	-0.6	…	0.2
黑色金属冶炼和压延加工业	…	3.9	…	5.1
有色金属冶炼和压延加工业	…	9.3	…	11.4
金属制品业	…	6.6	…	5.6
通用设备制造业	…	2.4	…	2.7
专用设备制造业	…	2.1	…	1.8
汽车制造业	…	7.6	…	10.5
铁路、船舶、航空航天和其他运输设备制造业	…	11.8	…	11.1
电气机械和器材制造业	…	3.9	…	4.8
计算机、通信和其他电子设备制造业	…	14.5	…	13.8
电力、热力生产和供应业	…	4	…	6
规模以上工业主要产品产量
布（亿米）	28	0.7	130	2.5
硫酸（折100％）（万吨）	829	11.2	4248	8.5
烧碱（折100％）（万吨）	369	7.8	1791	5.5
乙烯（万吨）	257	-6.8	1332	-2.8
化学纤维（万吨）	674	8.1	3203	15.4
水泥（万吨）	17953	-8.2	68727	-9.8
平板玻璃（万重量箱）	8430	6.1	41426	6.9
生铁（万吨）	7613	-1.2	36113	-3.7
粗钢（万吨）	9286	2.7	43861	-1.4
钢材（万吨）	12270	3.4	57405	2.9
十种有色金属（万吨）	661	7.4	3242	6.9
其中：原铝（电解铝）（万吨）	365	7.2	1789	7.1
金属切削机床（万台）	6	-4.8	27	4.2
工业机器人（套）	51496	14.1	227784	8.9
汽车（万辆）	235.3	1.3	1133.1	6.6
其中：轿车（万辆）	83.8	-4.4	392.8	-1
运动型多用途乘用车（SUV）（万辆）	95.1	2.8	464.3	12.7
其中：新能源汽车（万辆）	92.2	33.6	388.2	33.9
发电机组（发电设备）（万千瓦）	2147	4.9	7705	7.7
太阳能电池（光伏电池）（万千瓦）	4982	14.8	23778	22.8
微型计算机设备（万台）	2763	-1.9	12764	1.9
移动通信手持机（万台）	12703	4.5	62386	10.6
其中：智能手机（万台）	9225	4	46198	12
集成电路（亿块）	355	17.3	1703	32.7
原煤（万吨）	38385	-0.8	185788	-3
焦炭（万吨）	4096	-1.5	19947	-1.9
原油（万吨）	1815	0.6	8910	1.8
原油加工量（万吨）	6052	-1.8	30177	0.3
天然气（亿立方米）	203	6.3	1033	5.2
规模以上工业发电量（亿千瓦时）	7179	2.3	36570	5.5
火力发电量（亿千瓦时）	4538	-4.3	25173	3.6
水力发电量（亿千瓦时）	1150	38.6	4089	14.9
核能发电量（亿千瓦时）	360	-2.4	1765	1
风力发电量（亿千瓦时）	771	-3.3	4048	5
太阳能发电量（亿千瓦时）	359	29.1	1495	25.3
产品销售率（%）	96.6	0.0(百分点)	95.9	-0.4(百分点)
出口交货值（亿元）	12571	4.6	59139	3
