# Supplementary material
Source: ML conference proceedings conference paper supplement (https://openreview.net/forum?id=xg0fmtqh8d)
Supplement: supplementary_material [file 155_2024年3月中旬流通领域重要生产资料市场价格变动情况_2024-03-24.xlsx]

## Sheet: Sheet
产品名称	单位	本期价格（元）	比上期价格涨跌（元）	涨跌幅（%）
一、黑色金属
螺纹钢（Φ20mm，HRB400E）	吨	3582.2	-186.6	-5.0
线材（Φ8-10mm，HPB300）	吨	3771.7	-182.8	-4.6
普通中板（20mm，Q235）	吨	3948.3	-127.1	-3.1
热轧普通板卷（4.75-11.5mm，Q235）	吨	3817.4	-140.9	-3.6
无缝钢管（219*6，20#）	吨	4613.3	-64.5	-1.4
角钢（5#）	吨	4001.5	-104.5	-2.5
二、有色金属
电解铜（1#）	吨	71335.0	2325.0	3.4
铝锭（A00）	吨	19186.3	181.3	1.0
铅锭（1#）	吨	16068.8	264.6	1.7
锌锭（0#）	吨	21275.0	490.0	2.4
三、化工产品
硫酸（98%）	吨	315.7	29.2	10.2
烧碱（液碱，32%）	吨	822.8	26.7	3.4
甲醇（优等品）	吨	2403.8	18.4	0.8
纯苯（石油苯，工业级）	吨	8648.5	256.7	3.1
苯乙烯（一级品）	吨	9431.7	300.0	3.3
聚乙烯（LLDPE，熔融指数2薄膜料）	吨	8271.5	14.8	0.2
聚丙烯（拉丝料）	吨	7441.7	60.6	0.8
聚氯乙烯（SG5）	吨	5681.2	-19.5	-0.3
顺丁胶（BR9000）	吨	13366.7	350.0	2.7
涤纶长丝（POY150D/48F）	吨	7750.0	-150.0	-1.9
四、石油天然气
液化天然气（LNG）	吨	4110.5	123.4	3.1
液化石油气（LPG）	吨	4788.6	-73.1	-1.5
汽油（95#国VI）	吨	9348.0	12.8	0.1
汽油（92#国VI）	吨	9044.2	14.9	0.2
柴油（0#国VI）	吨	7753.3	69.1	0.9
石蜡（58#半）	吨	8317.9	147.9	1.8
五、煤炭
无烟煤（洗中块）	吨	1062.5	-37.5	-3.4
普通混煤（4500大卡）	吨	674.9	-34.1	-4.8
山西大混（5000大卡）	吨	774.4	-38.4	-4.7
山西优混（5500大卡）	吨	888.0	-34.2	-3.7
大同混煤（5800大卡）	吨	936.5	-35.8	-3.7
焦煤（主焦煤）	吨	1978.1	-280.2	-12.4
焦炭（准一级冶金焦）	吨	1912.9	-100.0	-5.0
六、非金属建材
普通硅酸盐水泥（P.O 42.5袋装）	吨	370.7	0.7	0.2
普通硅酸盐水泥（P.O 42.5散装）	吨	318.8	-0.9	-0.3
浮法平板玻璃（4.8/5mm）	吨	1916.1	-110.9	-5.5
七、农产品（主要用于加工）
稻米（粳稻米）	吨	4086.9	1.2	0.0
小麦（国标三等）	吨	2771.5	-27.3	-1.0
玉米（黄玉米二等）	吨	2336.1	-0.7	0.0
棉花（皮棉，白棉三级）	吨	16503.4	-19.6	-0.1
生猪（外三元）	千克	14.7	0.4	2.8
大豆（黄豆）	吨	4528.6	73.8	1.7
豆粕（粗蛋白含量≥43%）	吨	3479.2	159.4	4.8
花生（油料花生米）	吨	8416.7	0.0	0.0
八、农业生产资料
尿素（中小颗粒）	吨	2295.5	-22.7	-1.0
复合肥（硫酸钾复合肥，氮磷钾含量45%）	吨	3091.7	-14.8	-0.5
农药（草甘膦，95%原药）	吨	25462.5	-87.5	-0.3
九、林产品
天然橡胶（标准胶SCRWF）	吨	13924.0	928.2	7.1
纸浆（进口针叶浆）	吨	6129.1	171.7	2.9
瓦楞纸（AA级120g）	吨	2829.5	-45.4	-1.6
