# Supplementary material
Source: ML conference proceedings conference paper supplement (https://openreview.net/forum?id=xg0fmtqh8d)
Supplement: supplementary_material [file 156_2024年8月下旬流通领域重要生产资料市场价格变动情况_2024-09-04.xlsx]

## Sheet: Sheet
产品名称	单位	本期价格（元）	比上期价格涨跌（元）	涨跌幅（%）
一、黑色金属
螺纹钢（Φ20mm，HRB400E）	吨	3183.0	89.4	2.9
线材（Φ8—10mm，HPB300）	吨	3390.7	78.7	2.4
普通中板（20mm，Q235）	吨	3252.7	2.4	0.1
热轧普通板卷（4.75—11.5mm，Q235）	吨	3222.6	2.9	0.1
无缝钢管（219*6，20#）	吨	4196.3	-78.3	-1.8
角钢（5#）	吨	3492.3	6.9	0.2
二、有色金属
电解铜（1#）	吨	74095.0	1320.7	1.8
铝锭（A00）	吨	19677.5	520.4	2.7
铅锭（1#）	吨	17415.6	-420.1	-2.4
锌锭（0#）	吨	23907.5	858.9	3.7
三、化工产品
硫酸（98%）	吨	478.2	-3.6	-0.7
烧碱（液碱，32%）	吨	847.9	27.0	3.3
甲醇（优等品）	吨	2334.4	37.9	1.7
纯苯（石油苯，工业级）	吨	8524.6	10.5	0.1
苯乙烯（一级品）	吨	9442.7	-36.8	-0.4
聚乙烯（LLDPE，熔融指数2薄膜料）	吨	8337.3	-35.3	-0.4
聚丙烯（拉丝料）	吨	7605.2	15.9	0.2
聚氯乙烯（SG5）	吨	5518.0	36.1	0.7
顺丁胶（BR9000）	吨	14932.3	587.1	4.1
涤纶长丝（POY150D/48F）	吨	7431.3	-61.6	-0.8
四、石油天然气
液化天然气（LNG）	吨	4920.1	100.4	2.1
液化石油气（LPG）	吨	5067.7	0.0	0.0
汽油（95#国VI）	吨	9176.6	-88.7	-1.0
汽油（92#国VI）	吨	8903.5	-87.6	-1.0
柴油（0#国VI）	吨	7509.6	-61.8	-0.8
石蜡（58#半）	吨	8074.4	59.4	0.7
五、煤炭
无烟煤（洗中块）	吨	1147.8	-17.2	-1.5
普通混煤（4500大卡）	吨	638.8	-6.1	-0.9
山西大混（5000大卡）	吨	738.8	-6.1	-0.8
山西优混（5500大卡）	吨	838.8	-6.1	-0.7
大同混煤（5800大卡）	吨	884.6	-6.1	-0.7
焦煤（主焦煤）	吨	1625.0	-75.0	-4.4
焦炭（准一级冶金焦）	吨	1612.9	-114.3	-6.6
六、非金属建材
普通硅酸盐水泥（P.O 42.5袋装）	吨	360.4	-2.9	-0.8
普通硅酸盐水泥（P.O 42.5散装）	吨	322.3	-1.9	-0.6
浮法平板玻璃（4.8/5mm）	吨	1373.6	-69.9	-4.8
七、农产品（主要用于加工）
稻米（粳稻米）	吨	4068.0	-2.3	-0.1
小麦（国标三等）	吨	2448.3	-0.8	0.0
玉米（黄玉米二等）	吨	2268.7	-6.2	-0.3
棉花（皮棉，白棉三级）	吨	14496.5	135.5	0.9
生猪（外三元）	千克	19.7	-1.2	-5.7
大豆（黄豆）	吨	4366.8	-21.5	-0.5
豆粕（粗蛋白含量≥43%）	吨	2952.6	50.9	1.8
花生（油料花生米）	吨	8416.7	0.0	0.0
八、农业生产资料
尿素（中小颗粒）	吨	2086.7	-53.4	-2.5
复合肥（硫酸钾复合肥，氮磷钾含量45%）	吨	3072.2	0.0	0.0
农药（草甘膦，95%原药）	吨	25000.0	-121.4	-0.5
九、林产品
天然橡胶（标准胶SCRWF）	吨	14901.0	467.7	3.2
纸浆（进口针叶浆）	吨	6171.0	74.8	1.2
瓦楞纸（AA级120g）	吨	2610.9	-9.9	-0.4
