# Supplementary material
Source: ML conference proceedings conference paper supplement (https://openreview.net/forum?id=xg0fmtqh8d)
Supplement: supplementary_material [file 157_2023年我国“三新”经济增加值相当于国内生产总值的比重为17.73%_2024-07-30.xlsx]

## Sheet: Sheet
产业	增加值(亿元)	现价增速(%)	构成(%)
“三新”经济	223528	6.4	100.0
第一产业	8728	3.2	3.9
第二产业	93491	0.7	41.8
第三产业	121309	11.5	54.3
