# Supplementary material
Source: ML conference proceedings conference paper supplement (https://openreview.net/forum?id=xg0fmtqh8d)
Supplement: supplementary_material [file 158_2024年3月下旬流通领域重要生产资料市场价格变动情况_2024-04-04.xlsx]

## Sheet: Sheet
产品名称	单位	本期价格（元）	比上期价格涨跌（元）	涨跌幅（%）
一、黑色金属
螺纹钢（Φ20mm，HRB400E）	吨	3542.6	-39.6	-1.1
线材（Φ8-10mm，HPB300）	吨	3732.6	-39.1	-1.0
普通中板（20mm，Q235）	吨	3915.2	-33.1	-0.8
热轧普通板卷（4.75-11.5mm，Q235）	吨	3795.9	-21.5	-0.6
无缝钢管（219*6，20#）	吨	4583.5	-29.8	-0.6
角钢（5#）	吨	3939.5	-62.0	-1.5
二、有色金属
电解铜（1#）	吨	72117.9	782.9	1.1
铝锭（A00）	吨	19352.9	166.6	0.9
铅锭（1#）	吨	16146.4	77.6	0.5
锌锭（0#）	吨	21004.3	-270.7	-1.3
三、化工产品
硫酸（98%）	吨	352.1	36.4	11.5
烧碱（液碱，32%）	吨	866.0	43.2	5.3
甲醇（优等品）	吨	2386.0	-17.8	-0.7
纯苯（石油苯，工业级）	吨	8549.6	-98.9	-1.1
苯乙烯（一级品）	吨	9338.3	-93.4	-1.0
聚乙烯（LLDPE，熔融指数2薄膜料）	吨	8287.6	16.1	0.2
聚丙烯（拉丝料）	吨	7460.2	18.5	0.2
聚氯乙烯（SG5）	吨	5667.9	-13.3	-0.2
顺丁胶（BR9000）	吨	13473.8	107.1	0.8
涤纶长丝（POY150D/48F）	吨	7621.4	-128.6	-1.7
四、石油天然气
液化天然气（LNG）	吨	4030.9	-79.6	-1.9
液化石油气（LPG）	吨	4812.2	23.6	0.5
汽油（95#国VI）	吨	9434.6	86.6	0.9
汽油（92#国VI）	吨	9134.7	90.5	1.0
柴油（0#国VI）	吨	7819.8	66.5	0.9
石蜡（58#半）	吨	8411.7	93.8	1.1
五、煤炭
无烟煤（洗中块）	吨	997.9	-64.6	-6.1
普通混煤（4500大卡）	吨	643.7	-31.2	-4.6
山西大混（5000大卡）	吨	739.7	-34.7	-4.5
山西优混（5500大卡）	吨	846.9	-41.1	-4.6
大同混煤（5800大卡）	吨	892.9	-43.6	-4.7
焦煤（主焦煤）	吨	1850.0	-128.1	-6.5
焦炭（准一级冶金焦）	吨	1784.3	-128.6	-6.7
六、非金属建材
普通硅酸盐水泥（P.O 42.5袋装）	吨	360.9	-9.8	-2.6
普通硅酸盐水泥（P.O 42.5散装）	吨	312.8	-6.0	-1.9
浮法平板玻璃（4.8/5mm）	吨	1808.9	-107.2	-5.6
七、农产品（主要用于加工）
稻米（粳稻米）	吨	4081.9	-5.0	-0.1
小麦（国标三等）	吨	2733.2	-38.3	-1.4
玉米（黄玉米二等）	吨	2317.6	-18.5	-0.8
棉花（皮棉，白棉三级）	吨	16523.9	20.5	0.1
生猪（外三元）	千克	15.2	0.5	3.4
大豆（黄豆）	吨	4560.4	31.8	0.7
豆粕（粗蛋白含量≥43%）	吨	3531.7	52.5	1.5
花生（油料花生米）	吨	8550.0	133.3	1.6
八、农业生产资料
尿素（中小颗粒）	吨	2192.8	-102.7	-4.5
复合肥（硫酸钾复合肥，氮磷钾含量45%）	吨	3082.5	-9.2	-0.3
农药（草甘膦，95%原药）	吨	25414.3	-48.2	-0.2
九、林产品
天然橡胶（标准胶SCRWF）	吨	13803.6	-120.4	-0.9
纸浆（进口针叶浆）	吨	6206.1	77.0	1.3
瓦楞纸（AA级120g）	吨	2766.2	-63.3	-2.2
