# Supplementary material
Source: ML conference proceedings conference paper supplement (https://openreview.net/forum?id=xg0fmtqh8d)
Supplement: supplementary_material [file 160_2024年7月上旬流通领域重要生产资料市场价格变动情况_2024-07-14.xlsx]

## Sheet: Sheet
产品名称	单位	本期价格（元）	比上期价格涨跌（元）	涨跌幅（%）
一、黑色金属
螺纹钢（Φ20mm，HRB400E）	吨	3502.6	-2.8	-0.1
线材（Φ8—10mm，HPB300）	吨	3687.2	1.0	0.0
普通中板（20mm，Q235）	吨	3717.4	-20.0	-0.5
热轧普通板卷（4.75—11.5mm，Q235）	吨	3718.1	-7.0	-0.2
无缝钢管（219*6，20#）	吨	4430.0	-13.1	-0.3
角钢（5#）	吨	3786.8	1.8	0.0
二、有色金属
电解铜（1#）	吨	79240.6	1062.3	1.4
铝锭（A00）	吨	20242.5	45.8	0.2
铅锭（1#）	吨	19412.5	575.0	3.1
锌锭（0#）	吨	24388.8	577.1	2.4
三、化工产品
硫酸（98%）	吨	385.6	28.0	7.8
烧碱（液碱，32%）	吨	841.8	13.9	1.7
甲醇（优等品）	吨	2363.2	2.0	0.1
纯苯（石油苯，工业级）	吨	8924.3	-492.0	-5.2
苯乙烯（一级品）	吨	9581.0	150.2	1.6
聚乙烯（LLDPE，熔融指数2薄膜料）	吨	8680.0	-20.0	-0.2
聚丙烯（拉丝料）	吨	7717.5	22.2	0.3
聚氯乙烯（SG5）	吨	5788.6	-15.9	-0.3
顺丁胶（BR9000）	吨	15170.8	72.2	0.5
涤纶长丝（POY150D/48F）	吨	8012.5	37.5	0.5
四、石油天然气
液化天然气（LNG）	吨	4404.8	69.8	1.6
液化石油气（LPG）	吨	4958.6	8.9	0.2
汽油（95#国VI）	吨	9409.9	50.3	0.5
汽油（92#国VI）	吨	9126.6	51.2	0.6
柴油（0#国VI）	吨	7751.8	22.6	0.3
石蜡（58#半）	吨	7580.8	36.2	0.5
五、煤炭
无烟煤（洗中块）	吨	1155.8	-29.2	-2.5
普通混煤（4500大卡）	吨	649.3	-17.1	-2.6
山西大混（5000大卡）	吨	748.3	-16.8	-2.2
山西优混（5500大卡）	吨	849.1	-16.0	-1.8
大同混煤（5800大卡）	吨	895.3	-16.8	-1.8
焦煤（主焦煤）	吨	1950.0	0.0	0.0
焦炭（准一级冶金焦）	吨	1912.9	25.0	1.3
六、非金属建材
普通硅酸盐水泥（P.O 42.5袋装）	吨	380.5	-0.3	-0.1
普通硅酸盐水泥（P.O 42.5散装）	吨	336.7	-1.3	-0.4
浮法平板玻璃（4.8/5mm）	吨	1596.2	-54.0	-3.3
七、农产品（主要用于加工）
稻米（粳稻米）	吨	4081.6	2.9	0.1
小麦（国标三等）	吨	2475.7	5.2	0.2
玉米（黄玉米二等）	吨	2391.0	7.4	0.3
棉花（皮棉，白棉三级）	千克	15448.9	39.6	0.3
生猪（外三元）	吨	18.4	0.8	4.5
大豆（黄豆）	吨	4546.9	28.1	0.6
豆粕（粗蛋白含量≥43%）	吨	3235.6	-11.4	-0.4
花生（油料花生米）	吨	8420.8	-19.5	-0.2
八、农业生产资料
尿素（中小颗粒）	吨	2345.3	-7.2	-0.3
复合肥（硫酸钾复合肥，氮磷钾含量45%）	吨	3058.3	5.5	0.2
农药（草甘膦，95%原药）	吨	25212.5	-137.5	-0.5
九、林产品
天然橡胶（标准胶SCRWF）	吨	14276.0	-144.8	-1.0
纸浆（进口针叶浆）	吨	6225.2	-110.1	-1.7
瓦楞纸（AA级120g）	吨	2628.4	-2.2	-0.1
