# Supplementary material
Source: ML conference proceedings conference paper supplement (https://openreview.net/forum?id=xg0fmtqh8d)
Supplement: supplementary_material [file 161_2024年1—6月份社会消费品零售总额同比增长3.7%_2024-07-15.xlsx]

## Sheet: Sheet
指 标	6月		1—6月
	绝对量(亿元)	同比增长(%)	绝对量(亿元)	同比增长(%)
社会消费品零售总额	40732	2.0	235969	3.7
其中：除汽车以外的消费品零售额	36364	3.0	213007	4.1
其中：限额以上单位消费品零售额	16994 -	-0.6	91057	3.1
其中：实物商品网上零售额		-	59596	8.8
按经营地分
城镇	35141	1.7	204559	3.6
乡村	5591	3.8	31410	4.5
按消费类型分
餐饮收入	4609	5.4	26243	7.9
其中：限额以上单位餐饮收入	1286	4.0	7192	5.6
商品零售额	36123	1.5	209726	3.2
其中：限额以上单位商品零售额	15708	-1.0	83865	2.9
其中：粮油、食品类	1833	10.8	10353	9.6
饮料类	298	1.7	1564	5.6
烟酒类	503	5.2	3055	10.0
服装、鞋帽、针纺织品类	1237	-1.9	7098	1.3
化妆品类	405	-14.6	2168	1.0
金银珠宝类	262	-3.7	1725	0.2
日用品类	717	0.3	3923	2.3
体育、娱乐用品类	142	-1.5	668	11.2
家用电器和音像器材类	1064	-7.6	4487	3.1
中西药品类	626	4.5	3534	4.4
文化办公用品类	414	-8.5	1838	-5.8
家具类	148	1.1	721	2.6
通讯器材类	820	2.9	3692	11.3
石油及制品类	2074	4.6	12026	4.1
汽车类	4367	-6.2	22962	-1.1
建筑及装潢材料类	151	-4.4	782	-1.2
