# Supplementary material
Source: ML conference proceedings conference paper supplement (https://openreview.net/forum?id=xg0fmtqh8d)
Supplement: supplementary_material [file 162_2024年1月中旬流通领域重要生产资料市场价格变动情况_2024-01-24.xlsx]

## Sheet: Sheet
产品名称	单位	本期价格（元）	比上期价格涨跌（元）	涨跌幅（%）
一、黑色金属
螺纹钢（Φ20mm，HRB400E）	吨	3905.7	-45.9	-1.2
线材（Φ8-10mm，HPB300）	吨	4116.6	-38.1	-0.9
普通中板（20mm，Q235）	吨	4084.2	-11.4	-0.3
热轧普通板卷（4.75-11.5mm，Q235）	吨	4050.5	-39.0	-1.0
无缝钢管（219*6，20#）	吨	4603.5	9.7	0.2
角钢（5#）	吨	4163.2	-50.0	-1.2
二、有色金属
电解铜（1#）	吨	68007.1	-687.9	-1.0
铝锭（A00）	吨	18982.9	-321.4	-1.7
铅锭（1#）	吨	16075.0	257.1	1.6
锌锭（0#）	吨	21212.9	-305.7	-1.4
三、化工产品
硫酸（98%）	吨	235.2	-21.5	-8.4
烧碱（液碱，32%）	吨	769.2	0.1	0.0
甲醇（优等品）	吨	2323.5	9.8	0.4
纯苯（石油苯，工业级）	吨	7673.3	278.4	3.8
苯乙烯（一级品）	吨	8534.0	177.1	2.1
聚乙烯（LLDPE，熔融指数2薄膜料）	吨	8184.0	-35.5	-0.4
聚丙烯（拉丝料）	吨	7339.8	-75.4	-1.0
聚氯乙烯（SG5）	吨	5649.7	-15.4	-0.3
顺丁胶（BR9000）	吨	12035.7	-52.4	-0.4
涤纶长丝（POY150D/48F）	吨	7525.0	-82.1	-1.1
四、石油天然气
液化天然气（LNG）	吨	4875.9	-720.5	-12.9
液化石油气（LPG）	吨	4823.5	-190.6	-3.8
汽油（95#国VI）	吨	9221.2	-4.7	-0.1
汽油（92#国VI）	吨	8916.1	-4.1	0.0
柴油（0#国VI）	吨	7643.8	-56.8	-0.7
石蜡（58#半）	吨	8220.0	0.0	0.0
五、煤炭
无烟煤（洗中块）	吨	1012.1	-22.2	-2.1
普通混煤（4500大卡）	吨	702.7	-9.9	-1.4
山西大混（5000大卡）	吨	805.7	-16.2	-2.0
山西优混（5500大卡）	吨	915.7	-16.2	-1.7
大同混煤（5800大卡）	吨	965.7	-17.0	-1.7
焦煤（主焦煤）	吨	2375.0	-135.7	-5.4
焦炭（准一级冶金焦）	吨	2212.9	-100.0	-4.3
六、非金属建材
普通硅酸盐水泥（P.O 42.5袋装）	吨	367.4	-4.3	-1.2
普通硅酸盐水泥（P.O 42.5散装）	吨	323.2	-6.0	-1.8
浮法平板玻璃（4.8/5mm）	吨	2040.4	11.4	0.6
七、农产品（主要用于加工）
稻米（粳稻米）	吨	4076.0	0.0	0.0
小麦（国标三等）	吨	2818.5	-19.0	-0.7
玉米（黄玉米二等）	吨	2340.0	-63.6	-2.6
棉花（皮棉，白棉三级）	吨	16087.9	87.4	0.5
生猪（外三元）	千克	13.7	-0.2	-1.4
大豆（黄豆）	吨	4555.8	-147.9	-3.1
豆粕（粗蛋白含量≥43%）	吨	3557.9	-253.8	-6.7
花生（油料花生米）	吨	8461.9	-15.5	-0.2
八、农业生产资料
尿素（中小颗粒）	吨	2309.7	-48.1	-2.0
复合肥（硫酸钾复合肥，氮磷钾含量45%）	吨	3175.4	-2.4	-0.1
农药（草甘膦，95%原药）	吨	26100.0	-150.0	-0.6
九、林产品
天然橡胶（标准胶SCRWF）	吨	12815.5	-20.2	-0.2
纸浆（进口针叶浆）	吨	5815.8	-65.6	-1.1
瓦楞纸（AA级120g）	吨	2862.4	-42.0	-1.4
