# Supplementary material
Source: ML conference proceedings conference paper supplement (https://openreview.net/forum?id=xg0fmtqh8d)
Supplement: supplementary_material [file 163_2024年7月下旬流通领域重要生产资料市场价格变动情况_2024-08-04.xlsx]

## Sheet: Sheet
产品名称	单位	本期价格（元）	比上期价格涨跌（元）	涨跌幅（%）
一、黑色金属
螺纹钢（Φ20mm，HRB400E）	吨	3292.1	-173.4	-5.0
线材（Φ8—10mm，HPB300）	吨	3503.3	-158.3	-4.3
普通中板（20mm，Q235）	吨	3554.9	-123.7	-3.4
热轧普通板卷（4.75—11.5mm，Q235）	吨	3541.3	-135.3	-3.7
无缝钢管（219*6，20#）	吨	4390.8	-39.2	-0.9
角钢（5#）	吨	3682.1	-94.3	-2.5
二、有色金属
电解铜（1#）	吨	74390.6	-4308.7	-5.5
铝锭（A00）	吨	19140.0	-677.1	-3.4
铅锭（1#）	吨	19406.3	-165.1	-0.8
锌锭（0#）	吨	22886.3	-1105.1	-4.6
三、化工产品
硫酸（98%）	吨	447.0	33.0	8.0
烧碱（液碱，32%）		836.1	-11.0	-1.3
甲醇（优等品）	吨	2345.5	-33.2	-1.4
纯苯（石油苯，工业级）	吨	8454.7	-169.2	-2.0
苯乙烯（一级品）	吨	9349.0	-154.2	-1.6
聚乙烯（LLDPE，熔融指数2薄膜料）	吨	8452.3	-94.6	-1.1
聚丙烯（拉丝料）	吨	7602.3	-67.7	-0.9
聚氯乙烯（SG5）	吨	5649.9	-63.1	-1.1
顺丁胶（BR9000）	吨	14927.1	-119.3	-0.8
涤纶长丝（POY150D/48F）	吨	7778.1	-207.6	-2.6
四、石油天然气
液化天然气（LNG）	吨	4632.7	156.2	3.5
液化石油气（LPG）	吨	5044.6	53.9	1.1
汽油（95#国VI）	吨	9363.6	-45.7	-0.5
汽油（92#国VI）	吨	9073.8	-45.8	-0.5
柴油（0#国VI）	吨	7649.3	-70.2	-0.9
石蜡（58#半）	吨	7773.3	107.2	1.4
五、煤炭
无烟煤（洗中块）	吨	1173.5	20.1	1.7
普通混煤（4500大卡）	吨	655.9	1.8	0.3
山西大混（5000大卡）	吨	756.8	2.4	0.3
山西优混（5500大卡）	吨	856.8	2.4	0.3
大同混煤（5800大卡）	吨	902.9	2.0	0.2
焦煤（主焦煤）	吨	1906.3	-35.1	-1.8
焦炭（准一级冶金焦）	吨	1894.2	-18.7	-1.0
六、非金属建材
普通硅酸盐水泥（P.O 42.5袋装）	吨	370.0	-9.2	-2.4
普通硅酸盐水泥（P.O 42.5散装）	吨	334.1	-3.9	-1.2
浮法平板玻璃（4.8/5mm）	吨	1479.7	-58.5	-3.8
七、农产品（主要用于加工）
稻米（粳稻米）	吨	4072.0	-4.9	-0.1
小麦（国标三等）	吨	2468.0	-3.5	-0.1
玉米（黄玉米二等）	吨	2347.8	-22.5	-0.9
棉花（皮棉，白棉三级）	吨	15114.1	-362.6	-2.3
生猪（外三元）	千克	19.4	0.4	2.1
大豆（黄豆）	吨	4509.6	16.1	0.4
豆粕（粗蛋白含量≥43%）	吨	3056.4	-11.3	-0.4
花生（油料花生米）	吨	8416.7	0.0	0.0
八、农业生产资料
尿素（中小颗粒）	吨	2203.5	-101.7	-4.4
复合肥（硫酸钾复合肥，氮磷钾含量45%）	吨	3086.1	11.9	0.4
农药（草甘膦，95%原药）	吨	25087.5	44.6	0.2
九、林产品
天然橡胶（标准胶SCRWF）	吨	13978.1	-115.9	-0.8
纸浆（进口针叶浆）	吨	6097.9	-34.5	-0.6
瓦楞纸（AA级120g）	吨	2603.2	-13.7	-0.5
