# Supplementary material
Source: ML conference proceedings conference paper supplement (https://openreview.net/forum?id=xg0fmtqh8d)
Supplement: supplementary_material [file 164_2024年1—3月份全国固定资产投资增长4.5%_2024-04-16.xlsx]

## Sheet: Sheet
年度	月份	环比增速（%）
2023年	3月	-0.37
	4月	-1.00
	5月	1.01
	6月	-0.15
	7月	-0.03
	8月	0.45
	9月	0.27
	10月	0.29
	11月	0.46
	12月	0.35
2024年	1月	0.16
	2月	0.62
	3月	0.14
