# Supplementary material
Source: ML conference proceedings conference paper supplement (https://openreview.net/forum?id=xg0fmtqh8d)
Supplement: supplementary_material [file 165_2024年5月上旬流通领域重要生产资料市场价格变动情况_2024-05-14.xlsx]

## Sheet: Sheet
产品名称	单位	本期价格（元）	比上期价格涨跌（元）	涨跌幅（%）
一、黑色金属
螺纹钢（Φ20mm，HRB400E）	吨	3715.4	35.7	1.0
线材（Φ8-10mm，HPB300）	吨	3889.7	38.9	1.0
普通中板（20mm，Q235）	吨	3905.1	3.3	0.1
热轧普通板卷（4.75-11.5mm，Q235）	吨	3825.5	-6.9	-0.2
无缝钢管（219*6，20#）	吨	4493.1	37.5	0.8
角钢（5#）	吨	3982.7	23.5	0.6
二、有色金属
电解铜（1#）	吨	80142.0	762.0	1.0
铝锭（A00）	吨	20494.0	97.3	0.5
铅锭（1#）	吨	17280.0	621.7	3.7
锌锭（0#）	吨	23140.0	615.0	2.7
三、化工产品
硫酸（98%）	吨	345.1	-11.6	-3.3
烧碱（液碱，32%）	吨	788.7	-0.2	0.0
甲醇（优等品）	吨	2555.2	58.1	2.3
纯苯（石油苯，工业级）	吨	8779.8	-35.7	-0.4
苯乙烯（一级品）	吨	9460.3	-150.4	-1.6
聚乙烯（LLDPE，熔融指数2薄膜料）	吨	8554.0	43.8	0.5
聚丙烯（拉丝料）	吨	7557.3	-11.7	-0.2
聚氯乙烯（SG5）	吨	5701.2	77.9	1.4
顺丁胶（BR9000）	吨	13218.3	25.4	0.2
涤纶长丝（POY150D/48F）	吨	7500.0	-89.3	-1.2
四、石油天然气
液化天然气（LNG）	吨	4302.1	120.0	2.9
液化石油气（LPG）	吨	5093.9	39.0	0.8
汽油（95#国VI）	吨	9528.8	-226.2	-2.3
汽油（92#国VI）	吨	9238.5	-229.2	-2.4
柴油（0#国VI）	吨	7684.2	-194.1	-2.5
石蜡（58#半）	吨	8270.0	-163.9	-1.9
五、煤炭	吨
无烟煤（洗中块）		1125.0	-10.0	-0.9
普通混煤（4500大卡）	吨	653.3	21.3	3.4
山西大混（5000大卡）	吨	751.7	23.8	3.3
山西优混（5500大卡）	吨	843.3	16.7	2.0
大同混煤（5800大卡）	吨	889.2	17.6	2.0
焦煤（主焦煤）	吨	1975.0	50.0	2.6
焦炭（准一级冶金焦）	吨	2012.9	157.1	8.5
六、非金属建材
普通硅酸盐水泥（P.O 42.5袋装）	吨	358.8	6.9	2.0
普通硅酸盐水泥（P.O 42.5散装）	吨	300.3	-6.3	-2.1
浮法平板玻璃（4.8/5mm）	吨	1701.1	-7.1	-0.4
七、农产品（主要用于加工）
稻米（粳稻米）	吨	4073.2	-7.1	-0.2
小麦（国标三等）	吨	2587.7	-10.8	-0.4
玉米（黄玉米二等）	吨	2266.5	-3.8	-0.2
棉花（皮棉，白棉三级）	吨	16078.8	-242.1	-1.5
生猪（外三元）	千克	15.0	0.1	0.7
大豆（黄豆）	吨	4587.5	59.5	1.3
豆粕（粗蛋白含量≥43%）	吨	3461.2	126.3	3.8
花生（油料花生米）	吨	8700.0	-50.0	-0.6
八、农业生产资料
尿素（中小颗粒）	吨	2296.2	56.4	2.5
复合肥（硫酸钾复合肥，氮磷钾含量45%）	吨	2994.4	-28.6	-0.9
农药（草甘膦，95%原药）	吨	26500.0	42.9	0.2
九、林产品
天然橡胶（标准胶SCRWF）	吨	13458.3	23.8	0.2
纸浆（进口针叶浆）	吨	6428.6	41.7	0.7
瓦楞纸（AA级120g）	吨	2623.6	-35.9	-1.3
