# Supplementary material
Source: ML conference proceedings conference paper supplement (https://openreview.net/forum?id=xg0fmtqh8d)
Supplement: supplementary_material [file 166_2024年1—7月份全国固定资产投资增长3.6%_2024-08-15.xlsx]

## Sheet: Sheet
年度	月份	环比增速（%）
2023年	7月	-0.89
	8月	1.17
	9月	0.01
	10月	0.15
	11月	0.31
	12月	0.12
2024年	1月	0.24
	2月	-0.04
	3月	0.81
	4月	-0.20
	5月	-0.09
	6月	0.56
	7月	-0.17
