# Supplementary material
Source: ML conference proceedings conference paper supplement (https://openreview.net/forum?id=xg0fmtqh8d)
Supplement: supplementary_material [file 167_2024年1—6月份全国固定资产投资增长3.9%_2024-07-15.xlsx]

## Sheet: Sheet
年度	月份	环比增速（%）
2023年	6月	-0.60
	7月	-0.38
	8月	0.48
	9月	0.19
	10月	0.20
	11月	0.36
	12月	0.24
2024年	1月	0.04
	2月	0.50
	3月	0.66
	4月	-0.06
	5月	0.03
	6月	0.21
