# Supplementary material
Source: ML conference proceedings conference paper supplement (https://openreview.net/forum?id=xg0fmtqh8d)
Supplement: supplementary_material [file 169_2024年1月中国采购经理指数运行情况_2024-01-31.xlsx]

## Sheet: Sheet
	PMI	生产	新订单	原材料库存	从业人员	供应商配送时间
2023年1月	50.1	49.8	50.9	49.6	47.7	47.6
2023年2月	52.6	56.7	54.1	49.8	50.2	52.0
2023年3月	51.9	54.6	53.6	48.3	49.7	50.8
2023年4月	49.2	50.2	48.8	47.9	48.8	50.3
2023年5月	48.8	49.6	48.3	47.6	48.4	50.5
2023年6月	49.0	50.3	48.6	47.4	48.2	50.4
2023年7月	49.3	50.2	49.5	48.2	48.1	50.5
2023年8月	49.7	51.9	50.2	48.4	48.0	51.6
2023年9月	50.2	52.7	50.5	48.5	48.1	50.8
2023年10月	49.5	50.9	49.5	48.2	48.0	50.2
2023年11月	49.4	50.7	49.4	48.0	48.1	50.3
2023年12月	49.0	50.2	48.7	47.7	47.9	50.3
2024年1月	49.2	51.3	49.0	47.6	47.6	50.8
