# Supplementary material
Source: ML conference proceedings conference paper supplement (https://openreview.net/forum?id=xg0fmtqh8d)
Supplement: supplementary_material [file 170_2023年居民收入和消费支出情况_2024-01-17.xlsx]

## Sheet: Sheet
指标	绝对量(元)	比上年增长(%)(括号内为实际增速)
(一)全国居民人均可支配收入	39218	6.3(6.1)
按常住地分:
城镇居民	51821	5.1(4.8)
农村居民	21691	7.7(7.6)
按收入来源分:
工资性收入	22053	7.1
经营净收入	6542	6.0
财产净收入	3362	4.2
转移净收入	7261	5.4
(二)全国居民人均可支配收入中位数按常住地分:	33036	5.3
城镇居民	47122	4.4
农村居民	18748	5.7
(三)全国居民人均消费支出	26796	9.2(9.0)
按常住地分:
城镇居民	32994	8.6(8.3)
农村居民	18175	9.3(9.2)
按消费类别分:
食品烟酒	7983	6.7
衣着	1479	8.4
居住	6095	3.6
生活用品及服务	1526	6.6
交通通信	3652	14.3
教育文化娱乐	2904	17.6
医疗保健	2460	16.0
其他用品及服务	697	17.1
