# Supplementary material
Source: ML conference proceedings conference paper supplement (https://openreview.net/forum?id=xg0fmtqh8d)
Supplement: supplementary_material [file 171_2023年居民收入和消费支出情况_2024-01-17.xlsx]

## Sheet: Sheet
指标	绝对量(元)	比上年名义增长(%)
(一)城镇居民人均可支配收入	51821	5.1
按收入来源分:
工资性收入	31321	5.9
经营净收入	5903	5.7
财产净收入	5392	2.9
转移净收入	9205	3.6
(二)城镇居民人均消费支出	32994	8.6
按消费类别分:
食品烟酒	9495	6.0
衣着	1880	8.4
居住	7822	2.3
生活用品及服务	1910	6.1
交通通信	4495	15.0
教育文化娱乐	3589	17.7
医疗保健	2850	14.9
其他用品及服务	953	17.1
(三)农村居民人均可支配收入	21691	7.7
按收入来源分:
工资性收入	9163	8.4
经营净收入	7431	6.6
财产净收入	540	6.0
转移净收入	4557	8.4
(四)农村居民人均消费支出	18175	9.3
按消费类别分:
食品烟酒	5880	7.2
衣着	921	6.6
居住	3694	5.5
生活用品及服务	992	6.2
交通通信	2480	11.2
教育文化娱乐	1951	15.9
医疗保健	1916	17.4
其他用品及服务	341	13.5
