# Supplementary material
Source: ML conference proceedings conference paper supplement (https://openreview.net/forum?id=xg0fmtqh8d)
Supplement: supplementary_material [file 172_2023年四季度全国规模以上工业产能利用率为75.9%_2024-01-17.xlsx]

## Sheet: Sheet
行业	四季度		全年
	产能利用率(%)	比上年同期增减(百分点)	产能利用率(%)	比上年同期增减(百分点)
工业	75.9	0.2	75.1	-0.5
其中：采矿业	77.1	0.6	75.6	-1.2
制造业	76.0	0.2	75.3	-0.5
电力、热力、燃气及水生产和供应业	74.4	0.4	73.0	0.2
其中：煤炭开采和洗选业	75.6	0.2	74.4	-0.5
石油和天然气开采业	92.1	0.8	91.4	-0.6
食品制造业	71.3	-0.6	70.3	-1.4
纺织业	76.2	0.0	76.4	-0.8
化学原料和化学制品制造业	76.7	0.7	75.3	-1.4
医药制造业	75.4	-2.2	74.9	-0.7
化学纤维制造业	85.7	6.5	84.3	2.0
非金属矿物制品业	64.7	-2.5	64.7	-2.3
黑色金属冶炼和压延加工业	76.4	2.9	78.2	1.9
有色金属冶炼和压延加工业	79.6	0.2	79.5	0.2
通用设备制造业	79.2	-0.1	79.2	0.0
专用设备制造业	77.5	0.0	77.5	-0.1
汽车制造业	76.9	3.7	74.6	1.9
电气机械和器材制造业	77.1	-1.9	77.0	-0.3
计算机、通信和其他电子设备制造业	77.6	-0.9	75.7	-2.1
