# Supplementary material
Source: ML conference proceedings conference paper supplement (https://openreview.net/forum?id=xg0fmtqh8d)
Supplement: supplementary_material [file 173_2024年2月份70个大中城市商品住宅销售价格变动情况_2024-03-15.xlsx]

## Sheet: Sheet
城市	环比	同比	1-2月平均	城市	环比	同比	1-2月平均
	上月=100	上年同月=100	上年同期=100		上月=100	上年同月=100	上年同期=100
北 京	99.1	94.7	95.5	唐 山	99.3	93.9	94.1
天 津	99.4	96.9	97.4	秦 皇 岛	98.9	94.5	95.0
石 家 庄	99.4	97.5	97.9	包 头	99.2	94.9	95.2
太 原	99.5	96.4	96.8	丹 东	99.7	94.3	94.3
呼和浩特	99.4	94.6	94.8	锦 州	99.4	95.0	95.2
沈 阳	99.0	94.1	94.4	吉 林	99.7	93.5	93.4
大 连	99.5	94.1	94.4	牡 丹 江	99.4	94.0	94.1
长 春	99.1	94.4	94.6	无 锡	100.2	94.9	95.3
哈 尔 滨	99.6	95.4	95.4	徐 州	99.4	89.7	90.3
上 海	99.4	94.0	94.7	扬 州	99.5	93.4	93.6
南 京	99.2	91.3	92.0	温 州	99.0	92.3	93.0
杭 州	99.3	95.8	96.4	金 华	99.0	93.8	94.2
宁 波	99.2	93.6	94.0	蚌 埠	99.1	95.3	95.8
合 肥	99.4	94.1	94.6	安 庆	99.2	94.7	95.1
福 州	99.1	93.2	93.8	泉 州	99.6	93.8	93.8
厦 门	98.9	91.2	91.6	九 江	99.5	94.4	94.6
南 昌	99.4	94.6	94.9	赣 州	99.5	98.7	98.8
济 南	99.3	96.3	96.8	烟 台	99.7	93.6	93.9
青 岛	99.4	93.8	94.2	济 宁	99.6	94.6	94.7
郑 州	99.3	92.7	93.2	洛 阳	99.0	94.1	94.5
武 汉	98.5	92.4	93.2	平 顶 山	98.9	95.1	95.5
长 沙	99.5	97.3	97.6	宜 昌	99.5	94.5	94.6
广 州	99.0	92.5	93.2	襄 阳	99.4	93.4	93.6
深 圳	99.5	93.9	94.4	岳 阳	99.7	95.8	96.3
南 宁	99.2	94.0	94.1	常 德	99.1	95.9	96.5
海 口	99.4	93.6	93.9	韶 关	99.2	96.2	96.3
重 庆	99.7	93.6	93.9	湛 江	99.3	95.3	95.9
成 都	99.1	97.2	98.1	惠 州	99.2	95.4	95.7
贵 阳	99.4	95.1	95.6	桂 林	99.6	95.2	95.6
昆 明	100.4	97.9	97.4	北 海	99.5	96.3	96.5
西 安	99.6	96.9	97.5	三 亚	99.6	98.8	99.0
兰 州	99.5	94.5	94.5	泸 州	99.8	97.3	97.5
西 宁	99.5	96.6	96.8	南 充	99.6	97.2	97.6
银 川	99.2	96.6	97.2	遵 义	99.7	96.5	96.9
乌鲁木齐	99.6	96.1	96.3	大 理	99.3	96.4	96.6
