# Supplementary material
Source: ML conference proceedings conference paper supplement (https://openreview.net/forum?id=xg0fmtqh8d)
Supplement: supplementary_material [file 174_2024年5月中旬流通领域重要生产资料市场价格变动情况_2024-05-24.xlsx]

## Sheet: Sheet
产品名称	单位	本期价格（元）	比上期价格涨跌（元）	涨跌幅（%）
一、黑色金属
螺纹钢（Φ20mm，HRB400E）	吨	3699.7	-15.7	-0.4
线材（Φ8-10mm，HPB300）	吨	3875.3	-14.4	-0.4
普通中板（20mm，Q235）	吨	3888.0	-17.1	-0.4
热轧普通板卷（4.75-11.5mm，Q235）	吨	3807.0	-18.5	-0.5
无缝钢管（219*6，20#）	吨	4502.2	9.1	0.2
角钢（5#）	吨	3953.3	-29.4	-0.7
二、有色金属
电解铜（1#）	吨	82504.2	2362.2	2.9
铝锭（A00）	吨	20601.7	107.7	0.5
铅锭（1#）	吨	18058.3	778.3	4.5
锌锭（0#）	吨	23675.0	535.0	2.3
三、化工产品
硫酸（98%）	吨	342.1	-3.0	-0.9
烧碱（液碱，32%）	吨	801.0	12.3	1.6
甲醇（优等品）	吨	2552.7	-2.5	-0.1
纯苯（石油苯，工业级）	吨	8830.2	50.4	0.6
苯乙烯（一级品）	吨	9432.6	-27.7	-0.3
聚乙烯（LLDPE，熔融指数2薄膜料）	吨	8581.2	27.2	0.3
聚丙烯（拉丝料）	吨	7583.3	26.0	0.3
聚氯乙烯（SG5）	吨	5808.3	107.1	1.9
顺丁胶（BR9000）	吨	13184.5	-33.8	-0.3
涤纶长丝（POY150D/48F）	吨	7425.0	-75.0	-1.0
四、石油天然气
液化天然气（LNG）	吨	4300.7	-1.4	0.0
液化石油气（LPG）	吨	5077.6	-16.3	-0.3
汽油（95#国VI）	吨	9411.0	-117.8	-1.2
汽油（92#国VI）	吨	9132.5	-106.0	-1.1
柴油（0#国VI）	吨	7629.6	-54.6	-0.7
石蜡（58#半）	吨	8270.0	0.0	0.0
五、煤炭
无烟煤（洗中块）	吨	1149.7	24.7	2.2
普通混煤（4500大卡）	吨	661.4	8.1	1.2
山西大混（5000大卡）	吨	761.4	9.7	1.3
山西优混（5500大卡）	吨	851.4	8.1	1.0
大同混煤（5800大卡）	吨	897.6	8.4	0.9
焦煤（主焦煤）	吨	1975.0	0.0	0.0
焦炭（准一级冶金焦）	吨	2012.9	0.0	0.0
六、非金属建材
普通硅酸盐水泥（P.O 42.5袋装）	吨	359.2	0.4	0.1
普通硅酸盐水泥（P.O 42.5散装）	吨	301.1	0.8	0.3
浮法平板玻璃（4.8/5mm）	吨	1704.8	3.7	0.2
七、农产品（主要用于加工）
稻米（粳稻米）	吨	4074.0	0.8	0.0
小麦（国标三等）	吨	2557.3	-30.4	-1.2
玉米（黄玉米二等）	吨	2292.8	26.3	1.2
棉花（皮棉，白棉三级）	吨	15881.0	-197.8	-1.2
生猪（外三元）	千克	15.3	0.3	2.0
大豆（黄豆）	吨	4587.4	-0.1	0.0
豆粕（粗蛋白含量≥43%）	吨	3476.0	14.8	0.4
花生（油料花生米）	吨	8636.1	-63.9	-0.7
八、农业生产资料
尿素（中小颗粒）	吨	2351.5	55.3	2.4
复合肥（硫酸钾复合肥，氮磷钾含量45%）	吨	2997.6	3.2	0.1
农药（草甘膦，95%原药）	吨	26500.0	0.0	0.0
九、林产品
天然橡胶（标准胶SCRWF）	吨	13681.0	222.7	1.7
纸浆（进口针叶浆）	吨	6420.7	-7.9	-0.1
瓦楞纸（AA级120g）	吨	2611.7	-11.9	-0.5
