# Supplementary material
Source: ML conference proceedings conference paper supplement (https://openreview.net/forum?id=xg0fmtqh8d)
Supplement: supplementary_material [file 176_2023年12月下旬流通领域重要生产资料市场价格变动情况_2024-01-04.xlsx]

## Sheet: Sheet
产品名称	单位	本期价格（元）	比上期价格涨跌（元）	涨跌幅（%）
一、黑色金属
螺纹钢（Φ20mm，HRB400E）	吨	3950.3	-5.8	-0.1
线材（Φ8-10mm，HPB300）	吨	4163.5	-10.4	-0.2
普通中板（20mm，Q235）	吨	4084.2	13.2	0.3
热轧普通板卷（4.75-11.5mm，Q235）	吨	4093.3	20.0	0.5
无缝钢管（219*6，20#）	吨	4581.5	-7.9	-0.2
角钢（5#）	吨	4224.3	36.7	0.9
二、有色金属
电解铜（1#）	吨	69306.4	578.3	0.8
铝锭（A00）	吨	19248.6	564.8	3.0
铅锭（1#）	吨	15564.3	48.7	0.3
锌锭（0#）	吨	21505.7	496.9	2.4
三、化工产品
硫酸（98%）	吨	281.7	-3.7	-1.3
烧碱（液碱，32%）	吨	772.3	-18.4	-2.3
甲醇（优等品）	吨	2358.5	-10.3	-0.4
纯苯（石油苯，工业级）	吨	7252.3	265.2	3.8
苯乙烯（一级品）	吨	8484.5	244.5	3.0
聚乙烯（LLDPE，熔融指数2薄膜料）	吨	8272.4	105.9	1.3
聚丙烯（拉丝料）	吨	7512.9	45.8	0.6
聚氯乙烯（SG5）	吨	5793.6	-0.9	0.0
顺丁胶（BR9000）	吨	12059.5	676.2	5.9
涤纶长丝（POY150D/48F）	吨	7564.3	173.7	2.4
四、石油天然气
液化天然气（LNG）	吨	5811.3	302.5	5.5
液化石油气（LPG）	吨	5086.2	-57.6	-1.1
汽油（95#国VI）	吨	9141.7	20.8	0.2
汽油（92#国VI）	吨	8831.6	28.0	0.3
柴油（0#国VI）	吨	7740.0	-66.6	-0.9
石蜡（58#半）	吨	8552.1	-117.9	-1.4
五、煤炭
无烟煤（洗中块）	吨	1087.4	-61.4	-5.3
普通混煤（4500大卡）	吨	720.9	-15.0	-2.0
山西大混（5000大卡）	吨	833.0	-9.5	-1.1
山西优混（5500大卡）	吨	942.9	-10.2	-1.1
大同混煤（5800大卡）	吨	994.3	-10.8	-1.1
焦煤（主焦煤）	吨	2575.0	43.7	1.7
焦炭（准一级冶金焦）	吨	2412.9	12.5	0.5
六、非金属建材
普通硅酸盐水泥（P.O42.5袋装）	吨	371.4	-0.4	-0.1
普通硅酸盐水泥（P.O42.5散装）	吨	334.2	0.2	0.1
浮法平板玻璃（4.8/5mm）	吨	2016.6	-5.4	-0.3
七、农产品（主要用于加工）
稻米（粳稻米）	吨	4076.0	4.5	0.1
小麦（国标三等）	吨	2888.6	-62.5	-2.1
玉米（黄玉米二等）	吨	2432.7	-52.8	-2.1
棉花（皮棉，白棉三级）	吨	15875.4	78.0	0.5
生猪（外三元）	千克	14.4	-0.1	-0.7
大豆（黄豆）	吨	4791.2	-40.9	-0.8
豆粕（粗蛋白含量≥43%）	吨	3911.3	-45.0	-1.1
花生（油料花生米）	吨	8550.0	-10.4	-0.1
八、农业生产资料
尿素（小颗粒）	吨	2367.5	-65.4	-2.7
复合肥（硫酸钾复合肥，氮磷钾含量45%）	吨	3177.8	0.0	0.0
农药（草甘膦，95%原药）	吨	26250.0	-62.5	-0.2
九、林产品
天然橡胶（标准胶SCRWF）	吨	12828.6	429.6	3.5
纸浆（进口针叶浆）	吨	5892.9	28.3	0.5
瓦楞纸（AA级120g	吨	2936.6	6.1	0.2
