# Supplementary material
Source: ML conference proceedings conference paper supplement (https://openreview.net/forum?id=xg0fmtqh8d)
Supplement: supplementary_material [file 177_2024年8月上旬流通领域重要生产资料市场价格变动情况_2024-08-14.xlsx]

## Sheet: Sheet
产品名称	单位	本期价格（元）	比上期价格涨跌（元）	涨跌幅（%）
一、黑色金属
螺纹钢（Φ20mm，HRB400E）	吨	3228.1	-64.0	-1.9
线材（Φ8—10mm，HPB300）	吨	3442.6	-60.7	-1.7
普通中板（20mm，Q235）	吨	3468.6	-86.3	-2.4
热轧普通板卷（4.75—11.5mm，Q235）	吨	3447.0	-94.3	-2.7
无缝钢管（219*6，20#）	吨	4368.9	-21.9	-0.5
角钢（5#）	吨	3625.6	-56.5	-1.5
二、有色金属
电解铜（1#）	吨	72267.1	-2123.5	-2.9
铝锭（A00）	吨	18911.4	-228.6	-1.2
铅锭（1#）	吨	18507.1	-899.2	-4.6
锌锭（0#）	吨	22367.1	-519.2	-2.3
三、化工产品
硫酸（98%）	吨	480.6	33.6	7.5
烧碱（液碱，32%）	吨	829.5	-6.6	-0.8
甲醇（优等品）	吨	2326.8	-18.7	-0.8
纯苯（石油苯，工业级）	吨	8506.0	51.3	0.6
苯乙烯（一级品）	吨	9461.2	112.2	1.2
聚乙烯（LLDPE，熔融指数2薄膜料）	吨	8415.5	-36.8	-0.4
聚丙烯（拉丝料）	吨	7602.6	0.3	0.0
聚氯乙烯（SG5）	吨	5613.0	-36.9	-0.7
顺丁胶（BR9000）	吨	14391.7	-535.4	-3.6
涤纶长丝（POY150D/48F）	吨	7671.4	-106.7	-1.4
四、石油天然气
液化天然气（LNG）	吨	4794.6	161.9	3.5
液化石油气（LPG）	吨	5089.8	45.2	0.9
汽油（95#国VI）	吨	9336.3	-27.3	-0.3
汽油（92#国VI）	吨	9061.0	-12.8	-0.1
柴油（0#国VI）	吨	7612.9	-36.4	-0.5
石蜡（58#半）	吨	7899.5	126.2	1.6
五、煤炭
无烟煤（洗中块）	吨	1172.0	-1.5	-0.1
普通混煤（4500大卡）	吨	654.4	-1.5	-0.2
山西大混（5000大卡）	吨	754.4	-2.4	-0.3
山西优混（5500大卡）	吨	854.4	-2.4	-0.3
大同混煤（5800大卡）	吨	901.4	-1.5	-0.2
焦煤（主焦煤）	吨	1814.3	-92.0	-4.8
焦炭（准一级冶金焦）	吨	1827.2	-67.0	-3.5
六、非金属建材
普通硅酸盐水泥（P.O 42.5袋装）	吨	366.9	-3.1	-0.8
普通硅酸盐水泥（P.O 42.5散装）	吨	326.9	-7.2	-2.2
浮法平板玻璃（4.8/5mm）	吨	1458.5	-21.2	-1.4
七、农产品（主要用于加工）
稻米（粳稻米）	吨	4072.0	0.0	0.0
小麦（国标三等）	吨	2466.4	-1.6	-0.1
玉米（黄玉米二等）	吨	2315.7	-32.1	-1.4
棉花（皮棉，白棉三级）	吨	14715.1	-399.0	-2.6
生猪（外三元）	千克	20.5	1.1	5.7
大豆（黄豆）	吨	4461.5	-48.1	-1.1
豆粕（粗蛋白含量≥43%）	吨	2975.4	-81.0	-2.7
花生（油料花生米）	吨	8416.7	0.0	0.0
八、农业生产资料
尿素（中小颗粒）	吨	2184.8	-18.7	-0.8
复合肥（硫酸钾复合肥，氮磷钾含量45%）	吨	3076.2	-9.9	-0.3
农药（草甘膦，95%原药）	吨	25100.0	12.5	0.0
九、林产品
天然橡胶（标准胶SCRWF）	吨	14139.3	161.2	1.2
纸浆（进口针叶浆）	吨	6099.6	1.7	0.0
瓦楞纸（AA级120g）	吨	2607.9	4.7	0.2
