# Supplementary material
Source: ML conference proceedings conference paper supplement (https://openreview.net/forum?id=xg0fmtqh8d)
Supplement: supplementary_material [file 178_2024年6月中旬流通领域重要生产资料市场价格变动情况_2024-06-24.xlsx]

## Sheet: Sheet
产品名称	单位	本期价格（元）	比上期价格涨跌（元）	涨跌幅（%）
一、黑色金属
螺纹钢（Φ20mm，HRB400E）	吨	3589.1	-55.4	-1.5
线材（Φ8—10mm，HPB300）	吨	3767.2	-52.0	-1.4
普通中板（20mm，Q235）	吨	3816.4	-37.3	-1.0
热轧普通板卷（4.75—11.5mm，Q235）	吨	3768.6	-17.3	-0.5
无缝钢管（219*6，20#）	吨	4475.9	-27.4	-0.6
角钢（5#）	吨	3870.5	-50.8	-1.3
二、有色金属
电解铜（1#）	吨	79129.4	-2086.6	-2.6
铝锭（A00）	吨	20545.0	-585.0	-2.8
铅锭（1#）	吨	18678.1	-31.9	-0.2
锌锭（0#）	吨	23572.5	-639.5	-2.6
三、化工产品
硫酸（98%）	吨	342.4	11.8	3.6
烧碱（液碱，32%）	吨	826.9	-0.1	0.0
甲醇（优等品）	吨	2411.1	-34.0	-1.4
纯苯（石油苯，工业级）	吨	9478.8	173.0	1.9
苯乙烯（一级品）	吨	9560.6	-81.1	-0.8
聚乙烯（LLDPE，熔融指数2薄膜料）	吨	8707.3	7.0	0.1
聚丙烯（拉丝料）	吨	7691.7	2.7	0.0
聚氯乙烯（SG5）	吨	5914.6	-94.7	-1.6
顺丁胶（BR9000）	吨	15245.8	967.5	6.8
涤纶长丝（POY150D/48F）	吨	7850.0	0.0	0.0
四、石油天然气
液化天然气（LNG）	吨	4321.7	17.3	0.4
液化石油气（LPG）	吨	4978.3	-23.8	-0.5
汽油（95#国VI）	吨	9367.3	-6.3	-0.1
汽油（92#国VI）	吨	9082.2	-4.7	-0.1
柴油（0#国VI）	吨	7732.8	19.2	0.2
石蜡（58#半）	吨	7540.0	-50.0	-0.7
五、煤炭
无烟煤（洗中块）	吨	1254.4	-75.6	-5.7
普通混煤（4500大卡）	吨	677.9	-2.1	-0.3
山西大混（5000大卡）	吨	777.9	-2.1	-0.3
山西优混（5500大卡）	吨	877.9	-3.6	-0.4
大同混煤（5800大卡）	吨	925.9	-3.6	-0.4
焦煤（主焦煤）	吨	1950.0	0.0	0.0
焦炭（准一级冶金焦）	吨	1874.4	-38.5	-2.0
六、非金属建材
普通硅酸盐水泥（P.O 42.5袋装）	吨	384.3	-3.3	-0.9
普通硅酸盐水泥（P.O 42.5散装）	吨	338.7	4.1	1.2
浮法平板玻璃（4.8/5mm）	吨	1690.0	7.1	0.4
七、农产品（主要用于加工）
稻米（粳稻米）	吨	4078.5	0.9	0.0
小麦（国标三等）	吨	2445.8	-19.6	-0.8
玉米（黄玉米二等）	吨	2367.4	34.6	1.5
棉花（皮棉，白棉三级）	吨	15519.3	-266.9	-1.7
生猪（外三元）	千克	18.6	0.0	0.0
大豆（黄豆）	吨	4549.3	9.8	0.2
豆粕（粗蛋白含量≥43%）	吨	3324.4	-75.6	-2.2
花生（油料花生米）	吨	8482.3	-17.7	-0.2
八、农业生产资料
尿素（中小颗粒）	吨	2349.0	-50.7	-2.1
复合肥（硫酸钾复合肥，氮磷钾含量45%）	吨	3052.8	7.8	0.3
农药（草甘膦，95%原药）	吨	25831.3	-198.7	-0.8
九、林产品
天然橡胶（标准胶SCRWF）	吨	14616.7	96.7	0.7
纸浆（进口针叶浆）	吨	6343.3	-27.4	-0.4
瓦楞纸（AA级120g）	吨	2622.7	17.1	0.7
