# Supplementary material
Source: ML conference proceedings conference paper supplement (https://openreview.net/forum?id=xg0fmtqh8d)
Supplement: supplementary_material [file 179_2024年7月中旬流通领域重要生产资料市场价格变动情况_2024-07-24.xlsx]

## Sheet: Sheet
产品名称	单位	本期价格（元）	比上期价格涨跌（元）	涨跌幅（%）
一、黑色金属
螺纹钢（Φ20mm，HRB400E）	吨	3465.5	-37.1	-1.1
线材（Φ8—10mm，HPB300）	吨	3661.6	-25.6	-0.7
普通中板（20mm，Q235）	吨	3678.6	-38.8	-1.0
热轧普通板卷（4.75—11.5mm，Q235）	吨	3676.6	-41.5	-1.1
无缝钢管（219*6，20#）	吨	4430.0	0.0	0.0
角钢（5#）	吨	3776.4	-10.4	-0.3
二、有色金属
电解铜（1#）	吨	78699.3	-541.3	-0.7
铝锭（A00）	吨	19817.1	-425.4	-2.1
铅锭（1#）	吨	19571.4	158.9	0.8
锌锭（0#）	吨	23991.4	-397.4	-1.6
三、化工产品
硫酸（98%）	吨	414.0	28.4	7.4
烧碱（液碱，32%）	吨	847.1	5.3	0.6
甲醇（优等品）	吨	2378.7	15.5	0.7
纯苯（石油苯，工业级）	吨	8623.9	-300.4	-3.4
苯乙烯（一级品）	吨	9503.2	-77.8	-0.8
聚乙烯（LLDPE，熔融指数2薄膜料）	吨	8546.9	-133.1	-1.5
聚丙烯（拉丝料）	吨	7670.0	-47.5	-0.6
聚氯乙烯（SG5）	吨	5713.0	-75.6	-1.3
顺丁胶（BR9000）	吨	15046.4	-124.4	-0.8
涤纶长丝（POY150D/48F）	吨	7985.7	-26.8	-0.3
四、石油天然气
液化天然气（LNG）	吨	4476.5	71.7	1.6
液化石油气（LPG）	吨	4990.7	32.1	0.6
汽油（95#国VI）	吨	9409.3	-0.6	0.0
汽油（92#国VI）	吨	9119.6	-7.0	-0.1
柴油（0#国VI）	吨	7719.5	-32.3	-0.4
石蜡（58#半）	吨	7666.1	85.3	1.1
五、煤炭
无烟煤（洗中块）	吨	1153.4	-2.4	-0.2
普通混煤（4500大卡）	吨	654.1	4.8	0.7
山西大混（5000大卡）	吨	754.4	6.1	0.8
山西优混（5500大卡）	吨	854.4	5.3	0.6
大同混煤（5800大卡）	吨	900.9	5.6	0.6
焦煤（主焦煤）	吨	1941.4	-8.6	-0.4
焦炭（准一级冶金焦）	吨	1912.9	0.0	0.0
六、非金属建材
普通硅酸盐水泥（P.O 42.5袋装）	吨	379.2	-1.3	-0.3
普通硅酸盐水泥（P.O 42.5散装）	吨	338.0	1.3	0.4
浮法平板玻璃（4.8/5mm）	吨	1538.2	-58.0	-3.6
七、农产品（主要用于加工）
稻米（粳稻米）	吨	4076.9	-4.7	-0.1
小麦（国标三等）	吨	2471.5	-4.2	-0.2
玉米（黄玉米二等）	吨	2370.3	-20.7	-0.9
棉花（皮棉，白棉三级）	吨	15476.7	27.8	0.2
生猪（外三元）	千克	19.0	0.6	3.3
大豆（黄豆）	吨	4493.5	-53.4	-1.2
豆粕（粗蛋白含量≥43%）	吨	3067.7	-167.9	-5.2
花生（油料花生米）	吨	8416.7	-4.1	0.0
八、农业生产资料
尿素（中小颗粒）	吨	2305.2	-40.1	-1.7
复合肥（硫酸钾复合肥，氮磷钾含量45%）	吨	3074.2	15.9	0.5
农药（草甘膦，95%原药）	吨	25042.9	-169.6	-0.7
九、林产品
天然橡胶（标准胶SCRWF）	吨	14094.0	-182.0	-1.3
纸浆（进口针叶浆）	吨	6132.4	-92.8	-1.5
瓦楞纸（AA级120g）	吨	2616.9	-11.5	-0.4
