# Supplementary material
Source: ML conference proceedings conference paper supplement (https://openreview.net/forum?id=xg0fmtqh8d)
Supplement: supplementary_material [file 180_2024年3月上旬流通领域重要生产资料市场价格变动情况_2024-03-14.xlsx]

## Sheet: Sheet
产品名称	单位	本期价格（元）	比上期价格涨跌（元）	涨跌幅（%）
一、黑色金属
螺纹钢（Φ20mm，HRB400E）	吨	3768.8	-89.7	-2.3
线材（Φ8-10mm，HPB300）	吨	3954.5	-109.2	-2.7
普通中板（20mm，Q235）	吨	4075.4	-37.4	-0.9
热轧普通板卷（4.75-11.5mm，Q235）	吨	3958.3	-56.0	-1.4
无缝钢管（219*6，20#）	吨	4677.8	-16.7	-0.4
角钢（5#）	吨	4106.0	-28.1	-0.7
二、有色金属
电解铜（1#）	吨	69010.0	129.3	0.2
铝锭（A00）	吨	19005.0	205.0	1.1
铅锭（1#）	吨	15804.2	54.2	0.3
锌锭（0#）	吨	20785.0	312.1	1.5
三、化工产品
硫酸（98%）	吨	286.5	41.4	16.9
烧碱（液碱，32%）	吨	796.1	6.7	0.8
甲醇（优等品）	吨	2385.4	25.7	1.1
纯苯（石油苯，工业级）	吨	8391.8	-72.6	-0.9
苯乙烯（一级品）	吨	9131.7	68.8	0.8
聚乙烯（LLDPE，熔融指数2薄膜料）	吨	8256.7	24.1	0.3
聚丙烯（拉丝料）	吨	7381.1	11.3	0.2
聚氯乙烯（SG5）	吨	5700.7	29.7	0.5
顺丁胶（BR9000）	吨	13016.7	85.7	0.7
涤纶长丝（POY150D/48F）	吨	7900.0	7.1	0.1
四、石油天然气
液化天然气（LNG）	吨	3987.1	48.5	1.2
液化石油气（LPG）	吨	4861.7	117.6	2.5
汽油（95#国VI）	吨	9335.2	-8.3	-0.1
汽油（92#国VI）	吨	9029.3	-11.2	-0.1
柴油（0#国VI）	吨	7684.2	76.2	1.0
石蜡（58#半）	吨	8170.0	190.5	2.4
五、煤炭
无烟煤（洗中块）	吨	1100.0	19.3	1.8
普通混煤（4500大卡）	吨	709.0	-13.9	-1.9
山西大混（5000大卡）	吨	812.8	-15.2	-1.8
山西优混（5500大卡）	吨	922.2	-15.8	-1.7
大同混煤（5800大卡）	吨	972.3	-16.8	-1.7
焦煤（主焦煤）	吨	2258.3	-66.7	-2.9
焦炭（准一级冶金焦）	吨	2012.9	-57.1	-2.8
六、非金属建材
普通硅酸盐水泥（P.O 42.5袋装）	吨	370.0	0.3	0.1
普通硅酸盐水泥（P.O 42.5散装）	吨	319.7	0.0	0.0
浮法平板玻璃（4.8/5mm）	吨	2027.0	-41.8	-2.0
七、农产品（主要用于加工）
稻米（粳稻米）	吨	4085.7	7.6	0.2
小麦（国标三等）	吨	2798.8	-20.2	-0.7
玉米（黄玉米二等）	吨	2336.8	21.5	0.9
棉花（皮棉，白棉三级）	吨	16523.0	-205.0	-1.2
生猪（外三元）	千克	14.3	0.6	4.4
大豆（黄豆）	吨	4454.8	22.7	0.5
豆粕（粗蛋白含量≥43%）	吨	3319.8	-9.9	-0.3
花生（油料花生米）	吨	8416.7	0.0	0.0
八、农业生产资料
尿素（中小颗粒）	吨	2318.2	13.7	0.6
复合肥（硫酸钾复合肥，氮磷钾含量45%）	吨	3106.5	-35.6	-1.1
农药（草甘膦，95%原药）	吨	25550.0	-100.0	-0.4
九、林产品
天然橡胶（标准胶SCRWF）	吨	12995.8	24.4	0.2
纸浆（进口针叶浆）	吨	5957.4	46.5	0.8
瓦楞纸（AA级120g）	吨	2874.9	2.0	0.1
