# Supplementary material
Source: ML conference proceedings conference paper supplement (https://openreview.net/forum?id=xg0fmtqh8d)
Supplement: supplementary_material [file 181_2024年6月上旬流通领域重要生产资料市场价格变动情况_2024-06-14.xlsx]

## Sheet: Sheet
产品名称	单位	本期价格（元）	比上期价格涨跌（元）	涨跌幅（%）
一、黑色金属
螺纹钢（Φ20mm，HRB400E）	吨	3644.5	-100.1	-2.7
线材（Φ8—10mm，HPB300）	吨	3819.2	-105.5	-2.7
普通中板（20mm，Q235）	吨	3853.7	-57.9	-1.5
热轧普通板卷（4.75—11.5mm，Q235）	吨	3785.9	-57.1	-1.5
无缝钢管（219*6，20#）	吨	4503.3	-19.5	-0.4
角钢（5#）	吨	3921.3	-62.3	-1.6
二、有色金属
电解铜（1#）	吨	81216.0	-3018.4	-3.6
铝锭（A00）	吨	21130.0	128.7	0.6
铅锭（1#）	吨	18710.0	341.2	1.9
锌锭（0#）	吨	24212.0	-376.8	-1.5
三、化工产品
硫酸（98%）	吨	330.6	-2.8	-0.8
烧碱（液碱，32%）	吨	827.0	8.9	1.1
甲醇（优等品）	吨	2445.1	-58.6	-2.3
纯苯（石油苯，工业级）	吨	9305.8	251.4	2.8
苯乙烯（一级品）	吨	9641.7	-84.8	-0.9
聚乙烯（LLDPE，熔融指数2薄膜料）	吨	8700.3	-9.9	-0.1
聚丙烯（拉丝料）	吨	7689.0	-23.5	-0.3
聚氯乙烯（SG5）	吨	6009.3	-104.6	-1.7
顺丁胶（BR9000）	吨	14278.3	798.1	5.9
涤纶长丝（POY150D/48F）	吨	7850.0	262.5	3.5
四、石油天然气
液化天然气（LNG）	吨	4304.4	5.9	0.1
液化石油气（LPG）	吨	5002.1	-65.7	-1.3
汽油（95#国VI）	吨	9373.6	-12.1	-0.1
汽油（92#国VI）	吨	9086.9	-10.7	-0.1
柴油（0#国VI）	吨	7713.6	34.7	0.5
石蜡（58#半）	吨	7590.0	-642.5	-7.8
五、煤炭
无烟煤（洗中块）	吨	1330.0	101.6	8.3
普通混煤（4500大卡）	吨	680.0	-2.4	-0.4
山西大混（5000大卡）	吨	780.0	-1.4	-0.2
山西优混（5500大卡）	吨	881.2	-0.4	0.0
大同混煤（5800大卡）	吨	929.2	-0.3	0.0
焦煤（主焦煤）	吨	1950.0	-6.3	-0.3
焦炭（准一级冶金焦）	吨	1912.9	-0.6	0.0
六、非金属建材
普通硅酸盐水泥（P.O42.5袋装）	吨	387.6	27.0	7.5
普通硅酸盐水泥（P.O42.5散装）	吨	334.6	24.7	8.0
浮法平板玻璃（4.8/5mm）	吨	1682.9	2.5	0.1
七、农产品（主要用于加工）
稻米（粳稻米）	吨	4077.6	3.2	0.1
小麦（国标三等）	吨	2465.4	-76.7	-3.0
玉米（黄玉米二等）	吨	2332.8	11.3	0.5
棉花（皮棉，白棉三级）	吨	15786.2	-308.4	-1.9
生猪（外三元）	千克	18.6	1.8	10.7
大豆（黄豆）	吨	4539.5	-74.6	-1.6
豆粕（粗蛋白含量≥43%）	吨	3400.0	-77.3	-2.2
花生（油料花生米）	吨	8500.0	-52.1	-0.6
八、农业生产资料
尿素（中小颗粒）	吨	2399.7	18.8	0.8
复合肥（硫酸钾复合肥，氮磷钾含量45%）	吨	3045.0	27.3	0.9
农药（草甘膦，95%原药）	吨	26030.0	-182.5	-0.7
九、林产品
天然橡胶（标准胶SCRWF）	吨	14520.0	173.1	1.2
纸浆（进口针叶浆）	吨	6370.7	-65.1	-1.0
瓦楞纸（AA级120g）	吨	2605.6	-1.9	-0.1
