# Supplementary material
Source: ML conference proceedings conference paper supplement (https://openreview.net/forum?id=xg0fmtqh8d)
Supplement: supplementary_material [file 182_2024年5月下旬流通领域重要生产资料市场价格变动情况_2024-06-04.xlsx]

## Sheet: Sheet
产品名称	单位	本期价格（元）	比上期价格涨跌（元）	涨跌幅（%）
一、黑色金属
螺纹钢（Φ20mm，HRB400E）	吨	3744.6	44.9	1.2
线材（Φ8—10mm，HPB300）	吨	3924.7	49.4	1.3
普通中板（20mm，Q235）	吨	3911.6	23.6	0.6
热轧普通板卷（4.75—11.5mm，Q235）	吨	3843.0	36.0	0.9
无缝钢管（219*6，20#）	吨	4522.8	20.6	0.5
角钢（5#）	吨	3983.6	30.3	0.8
二、有色金属
电解铜（1#）	吨	84234.4	1730.2	2.1
铝锭（A00）	吨	21001.3	399.6	1.9
铅锭（1#）	吨	18368.8	310.5	1.7
锌锭（0#）	吨	24588.8	913.8	3.9
三、化工产品
硫酸（98%）	吨	333.4	-8.7	-2.5
烧碱（液碱，32%）	吨	818.1	17.1	2.1
甲醇（优等品）	吨	2503.7	-49.0	-1.9
纯苯（石油苯，工业级）	吨	9054.4	224.2	2.5
苯乙烯（一级品）	吨	9726.5	293.9	3.1
聚乙烯（LLDPE，熔融指数2薄膜料）	吨	8710.2	129.0	1.5
聚丙烯（拉丝料）	吨	7712.5	129.2	1.7
聚氯乙烯（SG5）	吨	6113.9	305.6	5.3
顺丁胶（BR9000）	吨	13480.2	295.7	2.2
涤纶长丝（POY150D/48F）	吨	7587.5	162.5	2.2
四、石油天然气
液化天然气（LNG）	吨	4298.5	-2.2	-0.1
液化石油气（LPG）	吨	5067.8	-9.8	-0.2
汽油（95#国VI）	吨	9385.7	-25.3	-0.3
汽油（92#国VI）	吨	9097.6	-34.9	-0.4
柴油（0#国VI）	吨	7678.9	49.3	0.6
石蜡（58#半）	吨	8232.5	-37.5	-0.5
五、煤炭
无烟煤（洗中块）	吨	1228.4	78.7	6.8
普通混煤（4500大卡）	吨	682.4	21.0	3.2
山西大混（5000大卡）	吨	781.4	20.0	2.6
山西优混（5500大卡）	吨	881.6	30.2	3.5
大同混煤（5800大卡）	吨	929.5	31.9	3.6
焦煤（主焦煤）	吨	1956.3	-18.7	-0.9
焦炭（准一级冶金焦）	吨	1913.5	-99.4	-4.9
六、非金属建材
普通硅酸盐水泥（P.O42.5袋装）	吨	360.6	1.4	0.4
普通硅酸盐水泥（P.O42.5散装）	吨	309.9	8.8	2.9
浮法平板玻璃（4.8/5mm）	吨	1680.4	-24.4	-1.4
七、农产品（主要用于加工）
稻米（粳稻米）	吨	4074.4	0.4	0.0
小麦（国标三等）	吨	2542.1	-15.2	-0.6
玉米（黄玉米二等）	吨	2321.5	28.7	1.3
棉花（皮棉，白棉三级）	吨	16094.6	213.6	1.3
生猪（外三元）	千克	16.8	1.5	9.8
大豆（黄豆）	吨	4614.1	26.7	0.6
豆粕（粗蛋白含量≥43%）	吨	3477.3	1.3	0.0
花生（油料花生米）	吨	8552.1	-84.0	-1.0
八、农业生产资料
尿素（中小颗粒）	吨	2380.9	29.4	1.3
复合肥（硫酸钾复合肥，氮磷钾含量45%）	吨	3017.7	20.1	0.7
农药（草甘膦，95%原药）	吨	26212.5	-287.5	-1.1
九、林产品
天然橡胶（标准胶SCRWF）	吨	14346.9	665.9	4.9
纸浆（进口针叶浆）	吨	6435.8	15.1	0.2
瓦楞纸（AA级120g）	吨	2607.5	-4.2	-0.2
