# Supplementary material
Source: ML conference proceedings conference paper supplement (https://openreview.net/forum?id=xg0fmtqh8d)
Supplement: supplementary_material [file 183_2024年1月下旬流通领域重要生产资料市场价格变动情况_2024-02-04.xlsx]

## Sheet: Sheet
产品名称	单位	本期价格 （元）	比上期价格涨跌 （元）	涨跌幅 （%）
一、黑色金属
螺纹钢（Φ20mm，HRB400E）	吨	3925.1	19.4	0.5
线材（Φ8-10mm，HPB300）	吨	4133.4	16.8	0.4
普通中板（20mm，Q235）	吨	4125.5	41.3	1.0
热轧普通板卷（4.75-11.5mm，Q235）	吨	4074.4	23.9	0.6
无缝钢管（219*6，20#）	吨	4676.9	73.4	1.6
角钢（5#）	吨	4178.0	14.8	0.4
二、有色金属
电解铜（1#）	吨	68585.0	577.9	0.8
铝锭（A00）	吨	18955.0	-27.9	-0.1
铅锭（1#）	吨	16228.1	153.1	1.0
锌锭（0#）	吨	21217.5	4.6	0.0
三、化工产品
硫酸（98%）	吨	228.5	-6.7	-2.8
烧碱（液碱，32%）	吨	790.0	20.8	2.7
甲醇（优等品）	吨	2368.1	44.6	1.9
纯苯（石油苯，工业级）	吨	8027.3	354.0	4.6
苯乙烯（一级品）	吨	8758.3	224.3	2.6
聚乙烯（LLDPE，熔融指数2薄膜料）	吨	8298.1	114.1	1.4
聚丙烯（拉丝料）	吨	7369.8	30.0	0.4
聚氯乙烯（SG5）	吨	5677.2	27.5	0.5
顺丁胶（BR9000）	吨	12114.6	78.9	0.7
涤纶长丝（POY150D/48F）	吨	7681.3	156.3	2.1
四、石油天然气
液化天然气（LNG）	吨	4954.8	78.9	1.6
液化石油气（LPG）	吨	4753.1	-70.4	-1.5
汽油（95#国VI）	吨	9251.4	30.2	0.3
汽油（92#国VI）	吨	8945.4	29.3	0.3
柴油（0#国VI）	吨	7641.5	-2.3	0.0
石蜡（58#半）	吨	8220.0	0.0	0.0
五、煤炭
无烟煤（洗中块）	吨	995.0	-17.1	-1.7
普通混煤（4500大卡）	吨	696.3	-6.4	-0.9
山西大混（5000大卡）	吨	800.8	-4.9	-0.6
山西优混（5500大卡）	吨	910.8	-4.9	-0.5
大同混煤（5800大卡）	吨	960.4	-5.3	-0.5
焦煤（主焦煤）	吨	2375.0	0.0	0.0
焦炭（准一级冶金焦）	吨	2212.9	0.0	0.0
六、非金属建材
普通硅酸盐水泥（P.O 42.5袋装）	吨	370.6	3.2	0.9
普通硅酸盐水泥（P.O 42.5散装）	吨	321.0	-2.2	-0.7
浮法平板玻璃（4.8/5mm）	吨	2045.1	4.7	0.2
七、农产品（主要用于加工）
稻米（粳稻米）	吨	4074.3	-1.7	0.0
小麦（国标三等）	吨	2737.5	-81.0	-2.9
玉米（黄玉米二等）	吨	2272.6	-67.4	-2.9
棉花（皮棉，白棉三级）	吨	16466.1	378.2	2.4
生猪（外三元）	千克	15.0	1.3	9.5
大豆（黄豆）	吨	4502.4	-53.4	-1.2
豆粕（粗蛋白含量≥43%）	吨	3433.5	-124.4	-3.5
花生（油料花生米）	吨	8416.7	-45.2	-0.5
八、农业生产资料
尿素（中小颗粒）	吨	2240.4	-69.3	-3.0
复合肥（硫酸钾复合肥，氮磷钾含量45%）	吨	3163.9	-11.5	-0.4
农药（草甘膦，95%原药）	吨	25912.5	-187.5	-0.7
九、林产品
天然橡胶（标准胶SCRWF）	吨	12708.3	-107.2	-0.8
纸浆（进口针叶浆）	吨	5833.4	17.6	0.3
瓦楞纸（AA级120g）	吨	2858.4	-4.0	-0.1
