# Supplementary material
Source: ML conference proceedings conference paper supplement (https://openreview.net/forum?id=xg0fmtqh8d)
Supplement: supplementary_material [file 184_2024年1—8月份全国固定资产投资增长3.4%_2024-09-14.xlsx]

## Sheet: Sheet
年度	月份	环比增速（%）
2023年	8月	1.01
	9月	0.30
	10月	0.06
	11月	0.34
	12月	0.40
2024年	1月	-0.42
	2月	0.96
	3月	0.09
	4月	0.03
	5月	0.04
	6月	0.28
	7月	-0.07
	8月	0.16
