# Supplementary material
Source: ML conference proceedings conference paper supplement (https://openreview.net/forum?id=xg0fmtqh8d)
Supplement: supplementary_material [file 185_2024年1—4月份全国固定资产投资增长4.2%_2024-05-17.xlsx]

## Sheet: Sheet
年度	月份	环比增速（%）
2023年	4月	-0.11
	5月	-0.05
	6月	0.02
	7月	-0.07
	8月	0.39
	9月	0.19
	10月	0.19
	11月	0.34
	12月	0.26
2024年	1月	-0.28
	2月	0.94
	3月	0.27
	4月	-0.03
