# Supplementary material
Source: ML conference proceedings conference paper supplement (https://openreview.net/forum?id=xg0fmtqh8d)
Supplement: supplementary_material [file 186_2024年1—2月份全国固定资产投资增长4.2%_2024-03-18.xlsx]

## Sheet: Sheet
年度	月份	环比增速（%）
2023年	1月	0.90
	2月	0.81
	3月	-0.72
	4月	-0.47
	5月	0.83
	6月	-0.25
	7月	-0.29
	8月	0.21
	9月	-0.04
	10月	-0.11
	11月	0.01
	12月	-0.25
2024年	1月	0.24
	2月	0.88
