# Supplementary material
Source: ML conference proceedings conference paper supplement (https://openreview.net/forum?id=xg0fmtqh8d)
Supplement: supplementary_material [file 187_则成电子首次覆盖报告:专注柔性电子领域,技术驱动受益下游增长.xlsx]

## Sheet: Sheet
资产负债表（百万元）	2023A	2024E	2025E	2026E
流动资产	331.45	349.16	398.46	469.01
现金	90.84	93.02	111.87	143.26
应收账款	51.24	62.25	75.89	92.88
其它应收款	1.89	3.75	4.55	5.56
预付账款	0.67	0.81	0.98	1.20
存货	75.02	97.55	118.30	144.14
其他	111.79	91.79	86.87	81.97
非流动资产	399.49	447.73	483.09	514.25
长期投资	20.89	22.07	23.36	24.33
固定资产	271.56	324.03	367.21	403.05
无形资产	27.45	26.24	25.02	23.81
其他	79.60	75.39	67.49	63.06
资产总计	730.94	796.89	881.55	983.26
流动负债	168.83	201.51	246.91	300.65
短期借款	0.00	10.00	20.00	30.00
应付账款	125.23	144.45	173.37	209.04
其他	43.61	47.06	53.54	61.61
非流动负债	56.80	56.48	56.48	56.48
长期借款	53.92	53.92	53.92	53.92
其他	2.88	2.56	2.56	2.56
负债合计	225.63	257.99	303.38	51.36
少数股东权益	0.00	0.00	0.00	0.00
归属母公司股东权益	505.31	538.90	578.16	626.13
负债和股东权益	730.94	796.89	881.55	983.26
