# Supplementary material
Source: ML conference proceedings conference paper supplement (https://openreview.net/forum?id=xg0fmtqh8d)
Supplement: supplementary_material [file 188_尚太科技2024半年报点评:产品具备差异化竞争优势,市占率持续提升.xlsx]

## Sheet: Sheet
	2022A	2023A	2024E	2025E	2026E
货币资金	22	1	7	14	24
应收和预付款项	23	18	18	19	24
存货	15	11	12	13	15
其他流动资产	3	17	14	14	10
流动资产合计	63	47	51	60	74
长期股权投资	0	0	0	0	0
投资性房地产	0	0	0	0	0
固定资产	22	23	24	24	24
在建工程	1	0	3	5	7
无形资产开发支出	2	2	3	4	4
长期待摊费用	0	0	0	0	0
其他非流动资产	64	48	53	61	75
资产总计	89	74	82	93	110
短期借款	17	7	6	6	6
应付和预收款项	4	2	3	4	6
长期借款	0	4	5	6	7
其他负债	16	5	3	4	5
负债合计	37	18	18	20	25
股本	3	3	3	3	3
资本公积	30	30	31	31	31
留存收益	19	24	31	40	53
归母公司股东权益	52	57	64	73	86
少数股东权益	0	0	0	0	0
股东权益合计	52	57	64	73	86
负债和股东权益	89	74	82	93	110
