# Supplementary material
Source: ML conference proceedings conference paper supplement (https://openreview.net/forum?id=xg0fmtqh8d)
Supplement: supplementary_material [file 189_华电国际2024年中报点评:煤电盈利大幅提升,集团优质资产拟注入.xlsx]

## Sheet: Sheet
	2023A	2024E	2025E	2026E
营业收入(百万元)	117176.13	114097.33	114636.40	116232.40
收入增长率%	9.45	-2.63	0.47	1.39
归母净利润(百万元)	4522.13	6139.79	7150.53	7945.44
利润增遇%	3789.00	35.77	16.46	11.12
毛利率%	6.43	11.03	11.96	13.37
摊薄EPS元	0.44	0.60	0.70	0.78
PE	12.37	9.11	7.82	7.04
PB	0.80	0.74	0.68	0.62
PS	0.48	0.49	0.49	0.48
