# Supplementary material
Source: ML conference proceedings conference paper supplement (https://openreview.net/forum?id=xg0fmtqh8d)
Supplement: supplementary_material [file 190_世运电路:24H1业绩高增,汽车+数通驱动公司未来高成长.xlsx]

## Sheet: Sheet
指标	2022A	2023A	2024E	2025E	2026E
营业收入(百万元)	4,432	4,519	5,339	6,509	7,224
增长率yoy%	18%	2%	18%	22%	11%
净利润(百万元)	434	496	681	851	1,007
增长率yoy%	107%	14%	37%	25%	18%
每股收益(元)	0.66	0.75	1.03	1.29	1.53
每股现金流量	1.50	2.18	0.77	1.81	2.37
净资产收益率	13%	14%	18%	19%	19%
P/E	28.8	25.2	18.4	14.7	12.4
P/B	4.2	3.8	3.4	2.9	2.5
