# Supplementary material
Source: ML conference proceedings conference paper supplement (https://openreview.net/forum?id=xg0fmtqh8d)
Supplement: supplementary_material [file 191_通富微电:营收创历史同期新高,深度绑定AMD持续受益.xlsx]

## Sheet: Sheet
	评级	说明
股票评级	买入	预期未来6~12个月内相对同期基准指数涨幅在15%以上
	增持	预期未来6~12个月内相对同期基准指数涨幅在5%~15%之间
	持有	预期未来6~12个月内相对同期基准指数涨幅在-10%~+5%之间
	减持	预期未来6~12个月内相对同期基准指数跌幅在10%以上
行业评级	增持	预期未来6~12个月内对同期基准指数涨幅在10%以上
	中性	预期未来6~12个月内对同期基准指数涨幅在-10%~+10%之间
	减持	预期未来6~12个月内对同期基准指数跌幅在10%以上
备注：评级标准为报告发布日后的6~12 个月内公司股价（或行业指数）相对同期基准指数的相对市场表现。其中A 股市场以沪深300 指数为基准；新三板市场以三板成指（针对协议转让标的）或三板做市指数（针对做市转让标的）为基准；香港市场以摩根士丹利中国指数为基准，美股市场以标普 500 指数或纳斯达克综合指数为基准（另有说明的除外）。
