# Supplementary material
Source: ML conference proceedings conference paper supplement (https://openreview.net/forum?id=xg0fmtqh8d)
Supplement: supplementary_material [file 192_盛弘股份24年半年报点评:充电桩业务收入高增,储能业务静待改善.xlsx]

## Sheet: Sheet
指标	2022A	2023A	2024E	2025E	2026E
营业收入	1,503	2,651	3,596	4,833	6,004
增长率 yoy%	47%	76%	36%	34%	24%
净利润（百万元）	224	403	494	684	843
增长率 yoy%	97%	80%	23%	38%	23%
每股收益（元）	0.72	1.29	1.59	2.20	2.71
每股现金流量	0.65	1.41	1.27	1.94	2.41
净资产收益率	21%	28%	28%	29%	28%
P/E	28.0	15.5	12.7	9.1	7.4
P/B	5.9	4.3	3.6	2.7	2.1
