# Supplementary material
Source: ML conference proceedings conference paper supplement (https://openreview.net/forum?id=xg0fmtqh8d)
Supplement: supplementary_material [file 193_芯瑞达24H1业绩点评:静待成长潜力释放.xlsx]

## Sheet: Sheet
会计年度	2023A	2024E	2025E	2026E
经营活动现金流	190	87	148	171
净利润	167	148	177	220
折旧摊销	27	32	33	35
财务费用	0	1	1	1
投资损失	-14	-14	-15	-16
营运资金变动	11	-78	-48	-68
其他经营现金流	156	224	225	288
投资活动现金流	-299	-45	-45	-44
资本支出	-87	-39	-42	-42
长期投资	-229	-15	-18	-19
其他投资现金流	18	9	15	16
筹资活动现金流	83	-47	6	6
短期借款	11	5	6	7
长期借款	0	0	0	0
普通股增加	2	38	0	0
资本公积增加	26	-25	0	0
其他筹资现金流	44	-65	-1	-1
现金净增加额	-25	-4	109	133
