# Supplementary material
Source: ML conference proceedings conference paper supplement (https://openreview.net/forum?id=xg0fmtqh8d)
Supplement: supplementary_material [file 194_招商蛇口24年中报点评:业绩波动下滑,强化投资管控.xlsx]

## Sheet: Sheet
资产负债表(百万元)	2022	2023	2024E	2025E	2026E
货币资金	86,243.12	88,289.51	96,622.06	103,444.26	116,053.11
应收票据及应收账款	3,912.60	3,500.22	3,998.68	4,115.12	4,444.94
预付账款	3,951.54	8,957.26	4,633.16	13,931.77	5,583.78
存货	411,549.22	416,702.14	375,403.77	404,323.21	386,056.40
其他	149,530.66	146,510.75	157,198.30	168,496.92	174,023.28
流动资产合计	655,187.14	663,959.88	637,855.98	694,311.28	686,161.51
长期股权投资	74,643.70	80,141.65	86,141.65	92,141.65	98,141.65
固定资产	10,820.18	11,618.29	10,115.50	8,538.97	6,890.12
在建工程	810.07	973.46	876.12	788.51	709.66
无形资产	1,472.66	1,983.70	1,929.49	1,920.28	1,953.57
其他	143,537.63	149,831.52	160,602.76	171,374.00	182,145.24
非流动资产合计	231,284.23	244,548.62	259,665.51	274,763.40	289,840.23
资产总计	886,471.38	908,508.50	897,521.49	969,074.69	976,001.74
短期借款	1,508.69	1,378.96	1,378.96	1,378.96	1,378.96
应付票据及应付账款	56,245.06	60,661.82	59,876.03	71,934.96	64,673.87
其他	221,234.34	202,450.44	346,219.02	396,138.05	399,207.53
流动负债合计	278,988.09	264,491.22	407,474.01	469,451.97	465,260.35
长期借款	121,073.55	118,770.67	118,770.67	118,770.67	118,770.67
应付债券	39,749.00	51,327.00	52,327.00	53,327.00	54,327.00
其他	17,298.66	15,696.65	17,696.65	19,696.65	21,696.65
非流动负债合计	178,121.20	185,794.32	188,794.32	191,794.32	194,794.32
负债合计	602,030.90	611,818.22	596,268.33	661,246.29	660,054.67
少数股东权益	182,728.57	176,966.89	178,772.82	180,807.53	183,140.62
股本	7,739.10	9,060.84	9,060.84	9,060.84	9,060.84
资本公积	10,213.67	20,447.94	20,447.94	20,447.94	20,447.94
留存收益	65,049.61	68,608.43	72,703.59	77,317.53	82,608.10
其他	18,709.53	21,606.18	20,267.97	20,194.56	20,689.57
股东权益合计	284,440.48	296,690.28	301,253.15	307,828.40	315,947.07
负债和股东权益总计	886,471.38	908,508.50	897,521.49	969,074.69	976,001.74
