# Supplementary material
Source: ML conference proceedings conference paper supplement (https://openreview.net/forum?id=xg0fmtqh8d)
Supplement: supplementary_material [file 195_中国平安2024年半年报点评:经营业绩稳健,核心业务增长强劲.xlsx]

## Sheet: Sheet
	2023A	2024E	2025E	2026E
营业收入(百万元)	991280.50	1077658.56	1176375.51	991280.50
营业收入增长率(%)	3.80%	8.48%	8.71%	9.16%
归母净利(百万元)	85665.00	96917.93	124585.04	155931.84
净利润增长率(%)	-22.83%	13.14%	28.55%	25.16%
摊薄每股收益(元)	4.84	5.32	6.84	8.56
市盈率(PE)	8.33	8.16	6.35	5.07
