# Supplementary material
Source: ML conference proceedings conference paper supplement (https://openreview.net/forum?id=xg0fmtqh8d)
Supplement: supplementary_material [file 196_沪电股份:24H1业绩高增,激励落地后续增长信心足.xlsx]

## Sheet: Sheet
指标	2022A	2023A	2024E	2025E	2026E
营业收入(百万元)	8,336	8,938	11,854	14,928	17,331
增长率yoy%	12%	7%	33%	26%	16%
净利润(百万元)	1,362	1,513	2,526	3,337	4,010
增长率yoy%	28%	11%	67%	32%	20%
每股收益(元)	0.71	0.79	1.32	1.74	2.09
每股现金流量	0.82	1.17	2.30	1.76	2.20
净资产收益率	16%	15%	22%	24%	24%
P/E	48.1	43.3	25.9	19.6	16.3
P/B	7.9	6.7	5.8	4.8	3.9
