# Supplementary material
Source: ML conference proceedings conference paper supplement (https://openreview.net/forum?id=xg0fmtqh8d)
Supplement: supplementary_material [file 197_困境突围:山东钢铁的“谋”与“变”.xlsx]

## Sheet: Sheet
时间	政策名称	重点内容
2023.4	山东省生态环境厅等五部门联合发布《关于全省长流程钢铁企业环保绩效全面创A 工作的通知》	《通知》梳理出四项重点任务。一是制定“一厂一策”创A方案。二是进一步提高清洁运输比例。三是强化有组织排放深度治理。四是提升无组织排放管控水平。
2023.1	山东省委、省政府印发《山东省建设绿色低碳高质量发展先行区三年行动计划(2023—2025 年) 》	通过产能置换、指标交易、股权合作等方式兼并重组，做大做强日—临沿海先进钢铁基地，优化提升莱—泰内陆精品钢基地， 推动内陆非规划基地钢铁产能应退尽退，沿海地区钢铁产能占比大幅提升。
2022.12	山东省生态环境厅等22 部门联合发布 《山东省深入打好重污染天气消除、臭氧污染防治 和柴油货车污染治理攻坚战行动方案(征求意见稿) 》	2025 年年底前， 胶济铁路沿线地区钢铁产能和全省落后钢铁产能全部退出， 逐步推进步进式烧结机、球团竖炉、独立烧结(球团)和独立热轧等淘汰退出。
2021.11	山东省工信厅发布 《山东省钢铁产业“十四五”发展规划》	“十四五”时期， 钢铁产业主营业务收入年均增长10%左右， 短流程炼钢占比达到20%左右，钢铁企业劳动生产率翻番，达到1500 吨/人·年;传输通道城市和胶济沿线钢铁企业产能应退尽退;到2025 年，钢铁冶炼压延及深加工配送产业总产值突破1万亿元;高端精品钢占比达到50%，钢材精深加工率达到25%左右，废钢在钢铁原料中占比达30%左右等。
2021.4	山东省新旧动能转换综合试验区建设领导小组印发了《全省落实“三个坚决”行动方案 (2021—2022 年) 》	到2022 年，山东省转移退出炼钢产能2141万吨、炼铁产能2238万吨，鼓励胶济铁路沿线地区的钢铁产能提前转移退出。
2020.5	山东省工信厅发布关于印发《2020 年山东省利用综合标准依法依规推动落后产能退出工作方案》	以钢铁等行业为重点，促使落后产能依法关停退出。对钢铁等行业能耗、电耗达不到强制性标准的产能，执行差别电价、阶梯电价、惩罚性电价和超定额用水累进加价等差别化能源资源价格。
2020.3	山东省人民政府办公厅印发《进一步规范产能过剩和高耗能行业工业投资项目办理加强事中事后监管工作的通知》	严格控制产能过剩和高耗能行业新建项目;严格执行产能置换，置换比例:大气污染传输通道城市2020-2022年依次为10%、25%、40%，胶济铁路沿线城市 2022-2025年为10%、20%、30%、40%。没有执行产能置换的项目，一律不予办理立项手续。
2018.11	山东省人民政府印发《关于加快七大高耗能 行业高质量发展的实施方案的通知》	严控钢铁总产能，用5 年时间，大幅压减转移京津冀大气污染传输通道城市和胶济铁路沿线地区的钢铁产能。目标:到2025 年，电炉钢占比达到20%左右;省内产能排在前2位的钢铁企业(集团)产业集中度达到70%以上;钢铁企业劳动生产率翻一番，达到1500 吨/人·年。
2018.10	山东省委、省政府出台《山东省先进钢铁制造产业基地发展规划(2018-2025 年) 》	到2025 年，沿海钢铁产能占比达到70%以上，合金钢比重提高至20%以上，全面实现“四提四戒”，具有国际水准的先进钢铁制造产业基地建设取得重大进展。
2015.4	山东省人民政府办公厅关于印发《山东省推进工业转型升级行动计划(2015-2020 年) 》 的通知	优化钢铁产业布局，推动内地产能向沿海临港发展。推进企业联合重组，提高产业集中度。坚持减量提效，加快淘汰落后产能。加快实施青钢搬迁，建设日照钢铁精 品基地，组建形成山钢、淄博齐鑫、潍坊精特、邹平钢铁、鲁中钢铁、临沂钢铁6大钢铁冶炼企业集团等。
