# Supplementary material
Source: ML conference proceedings conference paper supplement (https://openreview.net/forum?id=xg0fmtqh8d)
Supplement: supplementary_material [file 199_宁德时代2024年半年报业绩点评:锂电王者加快逆势扩展,新市场和新技术放量.xlsx]

## Sheet: Sheet
	2022A	2023A	2024E	2025E	2026E
毛利率	20.25%	22.91%	27.18%	26.88%	26.55%
销售净利率	9.35%	11.01%	13.18%	12.85%	12.38%
销售收入增长率	152.07%	22.01%	-4.38%	20.25%	32.69%
EBIT 增长率	73.29%	62.97%	20.39%	18.15%	28.29%
净利润增长率	92.89%	43.58%	14.48%	17.26%	27.83%
ROE	18.68%	22.32%	20.65%	19.49%	19.95%
ROA	5.11%	6.15%	6.69%	6.82%	7.24%
ROIC	10.33%	12.87%	13.10%	13.30%	14.46%
EPS(X)	7.18	11.79	11.48	13.46	17.21
PE(X)	54.82	13.85	15.70	13.39	10.48
PB(X)	5.84	3.63	3.24	2.61	2.09
PS(X)	2.92	1.79	2.07	1.72	1.30
EV/EBITDA(X)	19.49	7.84	6.82	5.23	3.56
