# Supplementary material
Source: ML conference proceedings conference paper supplement (https://openreview.net/forum?id=xg0fmtqh8d)
Supplement: supplementary_material [file 200_九洲集团2024年中报点评:装备制造高增长,综合能源迎拐点.xlsx]

## Sheet: Sheet
现金流量表(百万元)	2023A	2024E	2025E	2026E
经营活动现金流	633.26	195.82	428.23	429.17
净利润	100.74	150.93	196.09	232.20
折旧摊销	247.92	303.34	313.76	325.61
财务费用	154.09	93.17	102.17	108.42
投资损失	-93.93	-99.31	-103.39	-95.53
营运资金变动	208.20	-253.80	-81.72	-142.58
其它	16.24	1.48	1.31	1.05
投资活动现金流	-684.80	-496.21	-465.14	-377.90
资本支出	-543.71	-505.51	-478.53	-383.43
长期投资	-131.82	-100.00	-100.00	-100.00
其他	-9.27	109.31	113.39	105.53
筹资活动现金流	46.89	264.50	93.61	26.76
短期借款	6.19	200.00	100.00	100.00
长期借款	991.91	200.00	150.00	100.00
其他	-951.22	-135.50	-156.39	-173.24
现金净增加额	-4.65	-35.89	56.70	78.02
