# Supplementary material
Source: ML conference proceedings conference paper supplement (https://openreview.net/forum?id=xg0fmtqh8d)
Supplement: supplementary_material [file 202_长阳科技2024半年报点评:基本盘稳中向好,新兴产品未来可期.xlsx]

## Sheet: Sheet
指标	2023A	2024E	2025E	2026E
经营活动现金流量	99	196	214	375
净利润	95	115	201	295
折旧摊销	84	175	210	244
营运资金变动	-108	-108	-212	-190
其他	27	14	15	27
投资活动现金流量	-506	-606	-642	-600
资本支出	-509	-558	-642	-600
投资变动	3	-6	-7	-6
其他	-1	-42	6	6
筹资活动现金流量	358	123	404	323
债权融资	360	159	455	400
股权融资	49	0	0	0
其他	-50	-36	-51	-77
现金净流量	-43	-281	-24	98
