# Supplementary material
Source: ML conference proceedings conference paper supplement (https://openreview.net/forum?id=xg0fmtqh8d)
Supplement: supplementary_material [file 205_中航沈飞点评报告:归母净利稳定增长,成本管控能力突出.xlsx]

## Sheet: Sheet
	2023A	2024E	2025E	2026E
营业收入(亿元)	462.48	510.93	587.88	676.26
收入增长率(%)	11.18	10.48	15.06	15.03
归母净利润(亿元)	30.07	37.52	46.19	55.4
净利润增速(%)	30.47	24.78	23.11	20.01
毛利率(%)	10.95	12.60	12.60	12.80
摊薄EPS(元)	1.09	1.36	1.68	2.01
PE	37.17	29.79	24.20	20.16
PB	7.40	6.36	5.45	4.65
PS	2.42	2.19	1.90	1.65
