# Supplementary material
Source: ML conference proceedings conference paper supplement (https://openreview.net/forum?id=xg0fmtqh8d)
Supplement: supplementary_material [file 206_中航高科2024年半年度报告点评:航空新材料业绩稳增,优材百慕规模扩张.xlsx]

## Sheet: Sheet
财务数据和估值	2022A	2023A	2024E	2025E	2026E
营业收入(百万元)	4446.11	4779.57	5213.74	6283.28	7370.19
收入同比(%)	16.77	7.50	9.08	20.51	17.30
归母净利润(百万元)	764.64	1031.46	1188.11	1449.48	1721.88
归母净利润同比(%)	29.29	34.90	15.19	22.00	18.79
ROE(%)	14.07	16.54	16.70	17.67	18.15
每股收益(元)	0.55	0.74	0.85	1.04	1.24
市盈率(P/E)	33.85	25.09	21.78	17.86	15.03
