# Supplementary material
Source: ML conference proceedings conference paper supplement (https://openreview.net/forum?id=xg0fmtqh8d)
Supplement: supplementary_material [file 207_南华期货2024年半年报业绩点评:境外业务驱动增长.xlsx]

## Sheet: Sheet
	2023A	2024E	2025E	2026E
营业收入(百万元)	6,246.53	6,554.36	7,008.45	7,593.89
营业收入增长率(%)	-8.45%	4.93%	6.93%	8.35%
归母净利(百万元)	401.85	498.51	574.41	661.07
净利润增长率(%)	63.32%	24.05%	15.23%	15.09%
摊薄每股收益(元) 太	0.66	0.82	0.94	1.08
市盈率(PE)	18.18	11.44	9.93	8.63
