# Supplementary material
Source: ML conference proceedings conference paper supplement (https://openreview.net/forum?id=xg0fmtqh8d)
Supplement: supplementary_material [file 208_古井贡酒2024年中报点评:Q2业绩增25%,年份原浆引领增长.xlsx]

## Sheet: Sheet
会计年度	2022A	2023A	2024E	2025E	2026E
营业收入	16713.23	20253.53	24635.88	29215.76	34416.12
营业成本	3816.32	4239.85	5057.58	5768.56	6537.00
营业税金及附加	2824.06	3050.10	3818.56	4513.83	5317.29
营业费用	4668.19	5436.77	6447.21	7563.96	8820.85
管理费用	1166.78	1367.15	1606.26	1820.14	2068.41
研发费用	56.67	70.95	72.35	70.50	68.67
财务费用	-216.30	-162.24	-337.30	-408.24	-499.79
资产减值损失	-11.14	-31.05	-19.65	-20.61	-23.77
公允价值变动收益	29.15	19.99	24.57	22.28	23.42
投资净收益	-10.80	-6.34	-8.57	-7.45	-8.01
营业利润	4452.73	6282.93	8016.27	9930.26	12144.20
营业外收入	50.77	85.07	67.92	76.49	72.20
营业外支出	33.01	35.85	34.43	35.14	34.78
利润总额	4470.49	6332.15	8049.76	9971.61	12181.62
所得税	1218.66	1605.88	2044.64	2532.79	3094.13
净利润	3251.83	4726.27	6005.12	7438.82	9087.49
少数股东损益	108.69	137.11	174.30	215.91	263.76
归属母公司净利润	3143.14	4589.16	5830.82	7222.91	8823.73
EBITDA	4536.20	6495.04	8313.56	10378.38	12680.01
EPS(元)	5.95	8.68	11.03	13.66	16.69
