# Supplementary material
Source: ML conference proceedings conference paper supplement (https://openreview.net/forum?id=xg0fmtqh8d)
Supplement: supplementary_material [file 209_协鑫能科2024年中报点评:聚焦清洁能源,光储充算一体化协同优势显著.xlsx]

## Sheet: Sheet
主要财务比率	2023A	2024E	2025E	2026E
营业收入	-7.37%	21.89%	16.05%	17.70%
营业利润	74.71%	11.47%	24.20%	27.89%
归属母公司净利润	32.87%	20.27%	23.63%	27.13%
毛利率	21.75%	22.39%	23.11%	23.89%
净利率	8.96%	8.84%	9.42%	10.17%
ROE	8.28%	9.29%	10.63%	12.33%
ROIC	3.58%	4.66%	5.13%	6.09%
资产负债率	59.66%	60.32%	61.58%	60.26%
净负债比率	68.61%	73.18%	69.12%	62.79%
流动比率	0.96	1.66	1.85	1.80
速动比率	0.88	1.51	1.71	1.66
总资产周转率	0.32	0.36	0.37	0.42
应收账款周转率	2.73	2.91	2.82	2.86
应付账款周转率	10.24	12.53	11.42	12.13
每股收益	0.56	0.67	0.83	1.06
每股经营现金	1.40	1.29	1.83	2.08
每股净资产	6.76	7.25	7.84	8.59
P/E	21.99	10.25	8.29	6.52
P/B	1.83	0.95	0.88	0.80
EV/EBITDA	13.29	7.22	6.47	5.52
P/S	1.10	0.91	0.78	0.66
