# Supplementary material
Source: ML conference proceedings conference paper supplement (https://openreview.net/forum?id=xg0fmtqh8d)
Supplement: supplementary_material [file 210_璞泰来2024Q1业绩点评:Q1净利润环比提升,新技术落地加速.xlsx]

## Sheet: Sheet
	2022A	2023A	2024E	2025E	2026E
营业收入	15,464	15,340	15,902	20,492	29,714
营业成本	9,950	10,287	11,034	13,787	19,863
营业税金及附加	96	113	99	127	184
销售费用	196	214	202	260	377
管理费用	621	648	639	823	1,193
财务费用	-19	76	0	0	0
资产减值损失	-160	-1,075	-100	0	0
投资收益	28	24	16	20	30
公允价值变动	6	29	0	0	0
营业利润	3,684	2,364	3,056	4,499	6,652
其他非经营损益	-12	-12	0	0	0
利润总额	3,671	2,351	3,056	4,499	6,652
所得税	347	214	289	425	629
净利润	3,324	2,137	2,767	4,074	6,024
少数股东损益	220	225	292	430	635
归母股东净利润	3,104	1,912	2,475	3,644	5,388
