# Supplementary material
Source: ML conference proceedings conference paper supplement (https://openreview.net/forum?id=xg0fmtqh8d)
Supplement: supplementary_material [file 211_中国平安2024中报点评:EV增长超预期,投资收益同比稳健.xlsx]

## Sheet: Sheet
利润表(百万元)	2022A	2023A	2024E	2025E	2026E
营业收入	11,106	9,138	9,325	9,997	10,674
保费业务收入	5,499	5,364	5,499	5,673	5,887
银行业务利息净收入	1,311	1,189	2,178	2,125	2,105
投资收益	1,310	1,464	1,663	1,878	2,073
其他业务收入	2,985	1,120	-14	321	609
营业支出	-10,042	-7,929	-7,964	-8,411	-8,858
保险服务费用	-4,222	-4,402	-4,552	-4,739	-4,954
承保财务损益	-1,240	-1,240	-1,602	-1,703	-1,784
税金及附加	-51	-37	-31	-32	-34
业务及管理费	-1,647	-802	-931	-943	-974
非银行业务利息支出	-229	-243	-187	-188	-190
信用减值损失	-806	-777	-862	-905	-957
其他业务成本	-1,849	-428	200	99	36
营业利润	1,063	1,209	1,466	1,683	1,915
营业外收入	4	8	5	6	7
营业外支出	-9	-16	-7	-8	-9
利润总额	1,058	1,201	1,465	1,682	1,913
所得税	16	-108	-210	-227	-256
净利润	1,074	1,093	1,255	1,455	1,657
减:少数股东权益	237	236	267	322	339
归母净利润	838	857	989	1,133	1,319
