# Supplementary material
Source: ML conference proceedings conference paper supplement (https://openreview.net/forum?id=xg0fmtqh8d)
Supplement: supplementary_material [file 212_长阳科技2024半年报点评:基本盘稳中向好,新兴产品未来可期.xlsx]

## Sheet: Sheet
指标	2023A	2024E	2025E	2026E
营业收入	1253	1535	2127	2625
营业成本	914	1139	1515	1814
营业税金及附加	13	14	21	25
销售费用	52	63	88	108
管理费用	102	112	163	196
研发费用	69	77	111	134
财务费用	-6	3	6	15
资产减值损失	-32	0	0	0
投资收益	6	2	6	6
公允价值变动损益	0	0	0	0
营业利润	88	138	242	353
营业外收支净额	28	0	0	0
利润总额	115	138	242	353
所得税	20	23	41	59
净利润	95	115	201	295
少数股东损益	0	0	0	0
归属母公司股东净利润	95	115	201	295
