# Supplementary material
Source: ML conference proceedings conference paper supplement (https://openreview.net/forum?id=xg0fmtqh8d)
Supplement: supplementary_material [file 214_海力风电2023年报&2024年一季报点评:业绩短期承压,产能布局逐步完善.xlsx]

## Sheet: Sheet
	2022A	2023A	2024E	2025E	2026E
经营性现金流	-129	10	-1,209	-1,449	-257
投资性现金流	-1,342	-1,064	-884	-887	-823
融资性现金流	-468	480	31	105	112
现金增加额	-1,939	-575	-2,062	-2,232	-968
