# Supplementary material
Source: ML conference proceedings conference paper supplement (https://openreview.net/forum?id=xg0fmtqh8d)
Supplement: supplementary_material [file 215_佳力奇:航空复材结构件核心供应商,业务多方向拓展成长空间广阔.xlsx]

## Sheet: Sheet
规格型号	2021年			2022年			2023年
	金额	数量	均价	金额	数量	均价	金额	数量	均价
型号A	6,215.01	53,721	1,156.91	11,684.26	106,414	1,098.00	3,226.25	29,383	1,098.00
型号B	6,265.53	59,402	1,054.77	8,906.11	92,254	965.39	6,410.20	66,402	965.39
型号C	788.36	11,200	703.89	587.75	8,350	703.89	647.58	9,200	703.89
型号D	842.84	11,780	715.49	530.24	7,410.90	715.49	17.17	240	715.49
