# Supplementary material
Source: ML conference proceedings conference paper supplement (https://openreview.net/forum?id=xg0fmtqh8d)
Supplement: supplementary_material [file 216_盾安环境2024Q2点评:汽零增长逻辑持续验证.xlsx]

## Sheet: Sheet
会计年度	2023A	2024E	2025E	2026E
成长能力
营业收入	11.5%	10.1%	10.0%	9.3%
营业利润	75.0%	28.4%	12.1%	16.5%
归属于母公司净利润	-11.5%	41.9%	12.1%	16.5%
获利能力
毛利率(%)	19.2%	18.6%	18.7%	18.7%
净利率(%)	6.5%	8.4%	8.5%	9.1%
ROE(%)	16.7%	19.1%	17.7%	17.1%
ROIC(%)	13.4%	12.5%	11.5%	10.8%
偿债能力
资产负债率(%)	59.3%	53.3%	54.5%	50.7%
净负债比率(%)	145.8%	114.0%	119.7 %	103.0 %
流动比率	1.60	1.92	1.93	2.18
速动比率	1.29	1.45	1.62	1.81
营运能力
总资产周转率	1.19	1.12	1.05	0.98
应收账款周转率	6.53	7.60	7.11	6.53
应付账款周转率	4.64	4.49	4.50	4.64
每股指标(元)
每股收益	0.70	0.98	1.10	1.28
每股经营现金流(摊薄)	0.76	0.10	1.94	0.83
每股净资产	4.18	5.14	6.24	7.52
估值比率
P/E	19.64	10.65	9.50	8.16
P/B	3.29	2.04	1.68	1.39
EV/EBITDA	10.89	7.85	5.73	4.68
