# Supplementary material
Source: ML conference proceedings conference paper supplement (https://openreview.net/forum?id=xg0fmtqh8d)
Supplement: supplementary_material [file 217_华友钴业首次覆盖:长坡厚雪,穿越周期.xlsx]

## Sheet: Sheet
会计年度	2022A	2023A	2024E	2025E	2026E
成长能力
营业收入增长	78.5%	5.2%	18.9%	11.9%	4.0%
营业利润增长	23.9%	-20.7%	16.5%	19.8%	16.4%
归母净利润增长	0.3%	-14.2%	6.3%	19.9%	16.5%
获利能力
毛利率	18.6%	14.1%	14.2%	15.0%	16.1%
净利率	6.2%	5.1%	4.5%	4.8%	5.4%
ROE	15.1%	9.8%	9.4%	10.2%	10.6%
ROIC	8.5%	5.2%	6.5%	7.0%	7.6%
偿债能力
资产负债率	70.5%	64.4%	70.8%	70.7%	68.4%
净负债比率	63.2%	75.0%	86.2%	95.1%	69.0%
流动比率	0.93	1.01	0.92	0.88	0.99
速动比率	0.51	0.57	0.44	0.40	0.51
营运能力
总资产周转率	0.75	0.56	0.53	0.49	0.47
应收账款周转率	10.15	8.28	6.42	5.02	4.85
存货周转率	3.84	3.40	2.79	2.17	2.09
每股指标(元)
每股收益	2.29	1.96	2.08	2.50	2.91
每股经营现金流	1.70	2.04	7.85	6.85	7.46
每股净资产	15.14	20.04	22.05	24.59	27.54
估值比率
P/E	12.37	14.43	13.57	11.32	9.72
P/B	1.87	1.41	1.28	1.15	1.03
EV/EBITDA	13.47	10.54	7.79	7.25	6.12
