# Supplementary material
Source: ML conference proceedings conference paper supplement (https://openreview.net/forum?id=xg0fmtqh8d)
Supplement: supplementary_material [file 218_芯瑞达:MiniLED放量车载高潜.xlsx]

## Sheet: Sheet
会计年度	2023A	2024E	2025E	2026E
营业收入	1176	1548	2102	2656
营业成本	919	1200	1614	2016
营业税金及附加	2	5	6	7
销售费用	11	15	21	27
管理费用	35	46	61	74
财务费用	-2	-1	0	-3
资产减值损失	-9	0	0	0
公允价值变动收益	11	0	0	0
投资净收益	14	23	27	35
营业利润	190	245	347	471
营业外收入	0	0	0	0
营业外支出	1	0	0	0
利润总额	189	245	347	471
所得税	23	27	38	54
净利润	167	218	309	417
少数股东损益	0	0	0	0
归属母公司净利润	166	218	309	417
EBITDA	192	277	381	504
EPS(元)	0.90	1.17	1.66	2.24
