# Supplementary material
Source: ML conference proceedings conference paper supplement (https://openreview.net/forum?id=xg0fmtqh8d)
Supplement: supplementary_material [file 220_极米科技24H1点评:表观数据平淡背后的边际改善.xlsx]

## Sheet: Sheet
资产负债表		单位:百万元				利润表		单位:百万元
会计年度	2023	2024E	2025E	2026E		会计年度	2023	2024E	2025E	2026E
货币资金	2,190	2,392	2,037	1,916		营业收入	3,557	3,638	3,876	4,122
应收票据	0	0	0	0		营业成本	2,445	2,587	2,770	2,970
应收账款	216	192	174	173		税金及附加	27	29	31	33
预付账款	19	39	42	45		销售费用	645	586	580	580
存货	1,098	760	814	873		管理费用	150	141	143	145
合同资产	0	0	0	0		研发费用	381	373	373	377
其他流动资产	639	553	561	570		财务费用	-32	-14	-18	-12
流动资产合计	4,163	3,937	3,628	3,576		信用减值损失	1	2	0	0
其他长期投资	0	0	0	0		资产减值损失	-42	-24	-31	-32
长期股权投资	0	0	0	0		公允价值变动收益	19	30	30	30
固定资产	1,087	1,437	1,828	2,257		投资收益	3	7	6	6
在建工程	14	114	114	14		其他收益	112	100	100	100
无形资产	59	66	72	75		营业利润	33	49	100	133
其他非流动资产	259	275	292	309		营业外收入	0	1	1	1
非流动资产合计	1,419	1,892	2,306	2,655		营业外支出	3	2	2	2
资产合计	5,582	5,829	5,934	6,232		利润总额	30	48	99	132
短期借款	303	80	80	80		所得税	-90	-1	-2	-2
应付票据	28	48	49	51		净利润	120	49	101	134
应付账款	682	1,035	1,116	1,206		少数股东损益	-1	0	0	0
预收款项	0	0	0	0		归属母公司净利润	121	49	101	134
合同负债	36	65	70	74		NOPLAT	-6	34	83	121
其他应付款	63	63	63	63		EPS（按最新股本摊薄）	1.72	0.69	1.44	1.91
一年内到期的非流动负	债21	21	21	21
其他流动负债	182	175	177	179		主要财务比率
流动负债合计	1,316	1,488	1,576	1,674		会计年度	2023	2024E	2025E	2026E
长期借款	300	350	280	360		成长能力
应付债券	0	0	0	0		营业收入增长率	-16%	2%	7%	6%
其他非流动负债	846	846	846	846		EBIT增长率	-100%	2513%	141%	46%
非流动负债合计	1,146	1,196	1,126	1,206		归母公司净利润增长率	-76%	-60%	107%	33%
负债合计	2,462	2,684	2,702	2,880		获利能力
归属母公司所有者权益	3,117	3,142	3,228	3,348		毛利率	31%	29%	29%	28%
少数股东权益	3	3	3	3		净利率	3%	1%	3%	3%
所有者权益合计	3,120	3,145	3,232	3,351		ROE	4%	2%	3%	4%
负债和股东权益	5,582	5,829	5,934	6,232		ROIC	0%	1%	2%	3%
						偿债能力
现金流量表		单位:百万元				资产负债率	44%	46%	46%	46%
会计年度	2023	2024E	2025E	2026E		债务权益比	47%	41%	38%	39%
经营活动现金流	378	886	187	238		流动比率	316%	265%	230%	214%
现金收益	192	109	181	245		速动比率	233%	213%	179%	161%
存货影响	86	338	-54	-59		营运能力
经营性应收影响	149	29	47	30		总资产周转率	1	1	1	1
经营性应付影响	-323	372	82	92		应收账款周转天数	27	20	17	15
其他影响	274	38	-70	-71		应付账款周转天数	123	119	140	141
投资活动现金流	225	-511	-476	-437		存货周转天数	168	129	102	102
资本支出	-71	-532	-494	-456		每股指标（元）
股权投资	0	0	0	0		每股收益	2	1	1	2
其他长期资产变化	296	21	18	19		每股经营现金流	5	13	3	3
融资活动现金流	120	-173	-66	78		每股净资产	45	45	46	48
借款增加	310	-173	-70	80		估值比率
股利及利息支付	-152	-31	-32	-34		P/E	33	81	39	29
股东融资	0	0	0	0		P/B	1	1	1	1
其他影响	-38	31	36	32		EV/EBITDA	281	266	161	119
