# Supplementary material
Source: ML conference proceedings conference paper supplement (https://openreview.net/forum?id=xg0fmtqh8d)
Supplement: supplementary_material [file 221_金杯电工2024年半年报点评:扁线业务抓住机遇实现高增,线缆业务稳健增长.xlsx]

## Sheet: Sheet
	2022A	2023A	2024E	2025E	2026E
经营性现金流	691	410	464	934	982
投资性现金流	-285	12	-306	-221	-210
融资性现金流	-566	304	-187	-225	-205
现金增加额	-159	727	-28	487	567
