# Supplementary material
Source: ML conference proceedings conference paper supplement (https://openreview.net/forum?id=xg0fmtqh8d)
Supplement: supplementary_material [file 222_海光信息:国产算力领军企业,CPU+DCU双轮驱动.xlsx]

## Sheet: Sheet
专利家族	专利号/公告号	申请国家	专利名称	应用模块及功能实现描述	应用产品情况	评估价值(万美元)
100196	US8451064	美国	具有可调振荡器增益的压控 振荡器模块和相关的操作方法	涉及电路设计与实现，应用于处理器PLL 模块，扩展处理器核心、SoC 高频时钟振荡频率范围。该专利涉及使处理器拥有更稳定、更准确的时钟，减少因为相关制造工艺对时钟信号准确性的影响，提高处理器的质量，改善产品的性能，并且能提高装置随着时间推移的可靠性。	海光 CPU、DCU 系列产品	3,385.00
100435	US8570090(DIV)	美国	电子元件保护电源钳位电路	涉及电路设计与实现，应用于处理器ESD 器件，提高 ESD 等级，减少电源抖动误触发。该专利涉及设计减少或消除由 ESD 造成的危害的钳位电路。使处理器能够较好地处理 ESD，保护处理器尽量不受静电的影响，避免由ESD 导致的故障，减少处理器因静电而产生损耗，以提高处理器质量，以及改进处理器的现场可靠性。	海光CPU、DCU 系列产品	1,625.00
	US8390360	美国	电子元件保护电源钳位电路
NY0273	5795260	日本	具有隔离沟槽衬里的半导体器件及相关制造方法	涉及电路设计与实现，应用于所有全定制 IP。该专利提供一种制造半导体器件结构的方法，其中在产生的半导体器件结构中减小了宽度效应。该方法涉及提供具有半导体材料的衬底，用基本上抑制高 k 材料在上面形成的衬垫材料衬垫该隔离沟槽。然后用绝缘材料填充被衬垫的沟槽。然后，在该绝缘材料的至少一部分上方和该半导体材料的至少一部分上方形成高 k 栅材料层。该衬垫材料分开高 k 栅材料层，防止氧在该半导体材料的有源区域上方的迁移。减少高介质门电路沟道宽度效应的结构，提供减小高介质门电路沟道宽度效应的实现方法。	海光CPU、DCU 系列产品	1489
	US8217472	美国	具有隔离沟槽衬里的半导体器件及相关制造方法
	US7998832B2	美国	具有隔离沟槽衬里的半导体器件及相关制造方法
	JP5619003B2	日本	具有隔离沟槽衬里的半导体器件及相关制造方法
	KR2012003033A	韩国	具有隔离沟槽衬里的半导体器件及相关制造方法
	CN102132397A	中国	具有隔离沟槽衬里的半导体器件及相关制造方法
	EP2324496A1	欧洲	具有隔离沟槽衬里的半导体器件及相关制造方法
	US8716828B2	美国	具有隔离沟槽衬里的半导体器件及相关制造方法
P0068	US8677049	美国	区域预取器及其方法	涉及高速缓存设计，应用于处理器高速缓存模块，提高预取命中率。该专利可以改善处理器预取数据的准确性，更快地获得需要的数据，从而提升处理器的性能，改善执行不同种类任务的性能。	海光CPU、DCU 系列产品	2301
合计						8800
