# Supplementary material
Source: ML conference proceedings conference paper supplement (https://openreview.net/forum?id=xg0fmtqh8d)
Supplement: supplementary_material [file 223_新股覆盖研究:安乃达.xlsx]

## Sheet: Sheet
代码	简称	总市值(亿元)	PE-TTM	2023年收入(亿元)	收入YOY	2023年归母净利润(亿元)	归母净利润YOY	2023年销售毛利率(%)	2023年ROE摊薄(%)
603489.SH	八方股份	50.17	51.29	16.48	-42.18	1.28	-75.03	28.86	4.65
301418.SZ	协昌科技	31.80	39.65	4.49	-16.31	0.83	-21.39	27.62	5.21
行业均值	40.99	45.47	10.49	/	1.06	/	28.24	4.93
603350.SH	安乃达	/	/	14.27	2.12	1.48	-1.96	20.25	20.31
