# Supplementary material
Source: ML conference proceedings conference paper supplement (https://openreview.net/forum?id=xg0fmtqh8d)
Supplement: supplementary_material [file 224_恒拓开源首次覆盖报告:多元布局,驱动业务新增长.xlsx]

## Sheet: Sheet
可比公司	总市值(亿元)	归母净利润(百万)				市盈率PE
		2023A	2024E	2025E	2026E	2023A	2024E	2025E	2026E
软通动力	325.14	533.90	708.45	914.95	1140.74	82.46	44.15	34.18	27.42
广电运通	247.59	976.92	1147.72	1339.52	1577.38	31.17	21.88	18.74	15.92
润和软件	160.32	163.80	278.59	383.73	505.59	126.32	57.69	41.88	31.79
可比公司均值						79.98	41.24	31.60	25.04
恒拓开源	7.83	20.08	30.88	33.50	38.47	38.97	25.34	23.37	20.34
