# Supplementary material
Source: ML conference proceedings conference paper supplement (https://openreview.net/forum?id=xg0fmtqh8d)
Supplement: supplementary_material [file 225_双林股份:传统主业拐点至,丝杠打开成长新空间.xlsx]

## Sheet: Sheet
姓名	国籍	职务	获授的限制性股票数量(股)	占授予限制性股票总数的比例	占本激励计划公告时公司股本总额的比例
张子盛	中国	常务副总经理	30.00	1.96%	0.075%
陈有甫	中国	董事、副总经理	30.00	1.96%	0.075%
葛海岸	中国	董事、副总经理	30.00	1.96%	0.075%
朱黎明	中国	董事、财务总监、董事会秘书	30.00	1.96%	0.075%
钱雪明	中国	副总经理	30.00	1.96%	0.075%
LI FENG	美国	核心管理人员	30.00	1.96%	0.075%
核心管理人员及核心骨干(161人)			1,353.00	88.26%	3.376%
首次授予部分合计			1,533.00	100.00%	3.825%
