# Supplementary material
Source: ML conference proceedings conference paper supplement (https://openreview.net/forum?id=xg0fmtqh8d)
Supplement: supplementary_material [file 226_江苏金租2024年中报点评:利差环比改善,资产质量向好.xlsx]

## Sheet: Sheet
	2023	2024E	2025E	2026E
营业收入(百万元)	4,786.84	5,228.80	5,716.38	6,233.71
营业收入增长率(%)	10.14%	9.23%	9.32%	9.05%
归母净利(百万元)	2,660.09	2,907.92	3,186.14	3,480.75
净利润增长率(%)	10.30%	9.32%	9.57%	9.25%
摊薄每股收益(元)	0.63	0.63	0.69	0.76
市盈率(PE)	7.68	7.14	6.51	5.96
