# Supplementary material
Source: ML conference proceedings conference paper supplement (https://openreview.net/forum?id=xg0fmtqh8d)
Supplement: supplementary_material [file 227_蓝晓科技2024年中报点评:盈利能力持续提升,特种吸附龙头长风破浪.xlsx]

## Sheet: Sheet
主要财务比率	2023A	2024E	2025E	2026E
营业收入	29.62%	26.07%	25.97%	12.14%
营业利润	33.70%	37.75%	25.65%	23.25%
归属母公司净利润	33.35%	32.80%	25.17%	22.63%
毛利率	48.67%	48.96%	48.99%	50.14%
净利率	28.81%	30.35%	30.15%	32.98%
ROE	20.86%	23.48%	22.80%	21.92%
ROIC	18.92%	19.49%	18.99%	18.16%
资产负债率	39.32%	40.68%	38.14%	34.65%
净负债比率	-52.53%	-49.71%	-54.98%	-61.66%
流动比率	2.47	2.41	2.72	3.24
速动比率	1.77	1.77	2.11	2.63
总资产周转率	0.44	0.46	0.46	0.43
应收账款周转率	4.00	4.82	5.93	6.23
应付账款周转率	7.72	8.06	8.77	9.43
每股收益	1.42	1.89	2.36	2.89
每股经营现金	1.33	2.11	2.69	3.13
每股净资产	6.81	8.03	10.35	13.20
P/E	26.82	20.20	16.13	13.16
P/B	5.60	4.74	3.68	2.88
EV/EBITDA	25.95	15.58	11.73	9.06
P/S	7.73	6.12	4.86	4.34
