# Supplementary material
Source: ML conference proceedings conference paper supplement (https://openreview.net/forum?id=xg0fmtqh8d)
Supplement: supplementary_material [file 229_盾安环境2024Q2点评:汽零增长逻辑持续验证.xlsx]

## Sheet: Sheet
会计年度	2023A	2024E	2025E	2026E
经营活动现金流	812	102	2063	885
净利润	732	1058	1186	1381
折旧摊销	251	148	151	153
财务费用	62	35	41	47
投资损失	-28	-38	-53	-49
营运资金变动	-351	-1103	736	-650
其他经营现金流	1228	2163	452	2034
投资活动现金流	-16	-80	-65	-69
资本支出	-109	-101	-102	-103
长期投资	50	-11	-11	-11
其他投资现金流	43	33	48	44
筹资活动现金流	411	343	329	323
短期借款	-176	120	120	120
长期借款	450	200	200	200
普通股增加	0	8	0	0
资本公积增加	-2	0	0	0
其他筹资现金流	138	15	9	3
现金净增加额	1212	365	2326	1138
