# Supplementary material
Source: ML conference proceedings conference paper supplement (https://openreview.net/forum?id=xg0fmtqh8d)
Supplement: supplementary_material [file 231_盛通股份与腾讯云签署战略合作协议,AI+教育场景落地空间广阔.xlsx]

## Sheet: Sheet
	2022A	2023E	2024E	2025E
营业总收入(百万元)	2,239	2,718	3,069	3,495
同比	-7%	21%	13%	14%
归属母公司净利润(百万元)	5	162	220	291
同比	-93%	3249%	36%	32%
每股收益-最新股本摊薄(元/股)	0.01	0.30	0.41	0.54
P/E(现价&最新股本摊薄)	1,037.35	30.98	22.79	17.23
