# Supplementary material
Source: ML conference proceedings conference paper supplement (https://openreview.net/forum?id=xg0fmtqh8d)
Supplement: supplementary_material [file 232_长安汽车9月销量点评:9月新车密集发布,自主新能源表现稳健.xlsx]

## Sheet: Sheet
投资建议的评级标准		评级	说明
报告中投资建议所涉及的评级分为股票评级和行业评级（另有说明的除外）。评级标准为报告发布日后6到12个月内的相对市场表现，也即：以报告发布日后的6到12个月内的公司股价（或行业指数）相对同期相关证券市场代表性指数的涨跌幅作为基准。其中：A股市场以沪深300指数为基准，北交所市场以北证50指数为基准；香港市场以摩根士丹利中国指数为基准；美国市场以纳斯达克综合指数或标普500指数为基准；韩国市场以柯斯达克指数或韩国综合股价指数为基准。	股票评级	买入	相对同期相关证券市场代表性指数涨幅大于10%
		增持	相对同期相关证券市场代表性指数涨幅在5%～10%之间
		持有	相对同期相关证券市场代表性指数涨幅在-5%～5%之间
		卖出	相对同期相关证券市场代表性指数涨幅小于-5%
	行业评级	强于大市	相对表现优于同期相关证券市场代表性指数
		中性	相对表现与同期相关证券市场代表性指数持平
		弱于大市	相对表现弱于同期相关证券市场代表性指数
