# Supplementary material
Source: ML conference proceedings conference paper supplement (https://openreview.net/forum?id=xg0fmtqh8d)
Supplement: supplementary_material [file 233_五粮液:增长符合预期,需求保持稳健.xlsx]

## Sheet: Sheet
指标	2022A	2023A	2024E	2025E	2026E
营业收入(百万元)	73,969	83,272	92,803	102,640	113,122
增长率yoy%	11.72%	12.58%	11.45%	10.60%	10.21%
净利润(百万元)	26,691	30,211	34,124	38,186	42,793
增长率yoy%	14.17%	13.19%	12.95%	11.90%	12.06%
每股收益(元)	6.88	7.78	8.79	9.84	11.02
每股现金流量	6.29	10.75	8.05	19.11	3.00
净资产收益率	23.41%	23.32%	23.83%	24.27%	24.90%
P/E	17.89	15.81	13.99	12.51	11.16
PEG	1.43	1.28	1.06	1.00	0.91
P/B	4.19	3.69	3.33	3.04	2.78
