# Supplementary material
Source: ML conference proceedings conference paper supplement (https://openreview.net/forum?id=xg0fmtqh8d)
Supplement: supplementary_material [file 238_首次覆盖报告:天坛生物:高质量发展,血制品央企成长典范.xlsx]

## Sheet: Sheet
资产负债表(百万元)	2022A	2023A	2024E	2025E	2026E
总资产	12941	14188	15832	18167	20573
流动资产	7271	7569	8690	10547	12432
货币资金	3713	4555	5536	6591	8206
交易型金融资产	0	0	0	0	0
应收帐款	33	18	43	27	54
应收票据	983	76	129	108	165
其他应收款	28	39	41	52	55
存货	2332	2844	2904	3721	3904
可供出售投资	0	0	0	0	0
持有到期金融资产	0	0	0	0	0
长期投资	0	0	0	0	0
固定资产	2477	2793	3381	3894	4400
无形资产	930	1050	1129	1204	1274
总负债	1584	1434	1376	1640	1632
无息负债	1075	1291	1251	1515	1506
有息负债	509	143	125	125	125
股东权益	11356	12754	14456	16527	18941
股本	1648	1648	1977	1977	1977
公积金	2793	2793	2463	2463	2463
未分配利润	4096	5120	6201	7483	8975
少数股东权益	2561	2932	3490	4118	4835
