# Supplementary material
Source: ML conference proceedings conference paper supplement (https://openreview.net/forum?id=xg0fmtqh8d)
Supplement: supplementary_material [file 239_东鹏饮料2024年中报点评:逆势高增,补水啦放量.xlsx]

## Sheet: Sheet
（1）公司评级定义		(2)行业评级定义
买入	股价涨幅优于基准指数15%以上	推荐	行业指数表现优于基准指数10%以上
增持	股价涨幅相对基准指数介于5%与15%之间	中性	行业指数表现相对基准指数介于-10%~10%之间
持有	股价涨幅相对基准指数介于-5%与5%之间	回避	行业指数表现劣于基准指数10%以上
卖出	股价涨幅劣于基准指数5%以上
