# Supplementary material
Source: ML conference proceedings conference paper supplement (https://openreview.net/forum?id=xg0fmtqh8d)
Supplement: supplementary_material [file 240_中材科技行业景气度下滑,公司内生增长动力较强.xlsx]

## Sheet: Sheet
年结日:12月31日	2022	2023	2024E	2025E	2026E
净利润	3,731	2,716	2,540	3,382	4,381
折旧摊销	1,661	1,816	2,117	2,377	2,542
营运资金变动	(346)	(1,074)	180	184	(1,231)
其他	(1,886)	1,363	839	462	492
经营活动现金流	3,160	4,820	5,676	6,406	6,184
资本支出	(4,537)	(7,765)	(4,160)	(3,660)	(1,660)
投资变动	(206)	(152)	(148)	(148)	(148)
其他	1,081	406	48	38	43
投资活动现金流	(3,662)	(7,511)	(4,260)	(3,770)	(1,765)
银行借款	1,782	1,975	191	(830)	(1,794)
股权融资	2,888	(2,730)	(912)	(1,214)	(1,573)
其他	(1,084)	1,062	(1,362)	(221)	(632)
筹资活动现金流	3,585	307	(2,083)	(2,266)	(4,000)
净现金流	3,083	(2,384)	(667)	370	419
