# Supplementary material
Source: ML conference proceedings conference paper supplement (https://openreview.net/forum?id=xg0fmtqh8d)
Supplement: supplementary_material [file 241_古井贡酒2024年中报点评:Q2业绩增25%,年份原浆引领增长.xlsx]

## Sheet: Sheet
会计年度	2022A	2023A	2024E	2025E	2026E
经营活动现金流	3107.91	4496.21	6585.42	7867.58	9495.26
净利润	3251.83	4726.27	6005.12	7438.82	9087.49
折旧摊销	299.77	374.36	634.59	856.36	1035.60
财务费用	-216.30	-162.24	-337.30	-408.24	-499.79
投资损失	10.80	6.34	8.57	7.45	8.01
营运资金变动	-398.61	-1318.63	190.22	-210.67	-290.31
其他经营现金流	160.42	870.11	84.22	183.86	154.26
投资活动现金流	5268.71	-1277.93	-1573.69	-1502.68	-1547.50
资本支出	1580.22	2381.04	1528.50	1447.78	1494.56
长期投资	-6646.31	-1084.80	8.50	5.41	5.87
其他投资现金流	202.63	18.30	-36.70	-49.49	-47.07
筹资活动现金流	-1328.80	-1647.48	-1638.94	-2580.23	-3133.96
短期借款	53.20	-83.23	299.11	-299.11	0.00
长期借款	-127.41	62.16	15.11	10.13	6.77
普通股增加	0.00	0.00	0.00	0.00	0.00
资本公积增加	0.00	0.00	0.00	0.00	0.00
其他筹资现金流	-1254.59	-1626.41	-1953.15	-2291.25	-3140.73
现金净增加额	7047.82	1570.79	3372.79	3784.67	4813.79
