# Supplementary material
Source: ML conference proceedings conference paper supplement (https://openreview.net/forum?id=xg0fmtqh8d)
Supplement: supplementary_material [file 242_大胜达首次覆盖:深耕包装行业,努力拓展下游优质客户.xlsx]

## Sheet: Sheet
	2021A	2022E	2023E	2024E
营业收入(百万元)	1,664	1,853	2,187	2,507
(+/-%)	23.2	11.3	18.0	14.6
净利润(百万元)	98	116	139	164
(+/-%)	-65.0	19.1	19.4	17.9
摊薄每股收益(元)	0.23	0.28	0.33	0.39
市盈率(PE)	47.3	39.7	33.2	28.2
