# Supplementary material
Source: ML conference proceedings conference paper supplement (https://openreview.net/forum?id=xg0fmtqh8d)
Supplement: supplementary_material [file 243_拓荆科技:Q2营收创单季度新高,在手订单充足有望带动业绩爆发.xlsx]

## Sheet: Sheet
指标	2022A	2023A	2024E	2025E	2026E
营业收入(百万元)	1,706	2,705	3,936	5,372	6,852
增长率yoy%	125%	59%	45.5%	36.5%	27.5%
净利润(百万元)	369	663	780	1,093	1,479
增长率yoy%	438%	80%	17.7%	40.2%	35.3%
每股收益(元)	1.32	2.38	2.80	3.93	5.31
每股现金流量	0.89	-5.95	7.67	1.51	1.65
净资产收益率	10%	14%	15%	17%	19%
P/E	91.0	50.6	42.3	30.2	22.3
P/B	9.0	7.3	6.2	5.2	4.2
