# Supplementary material
Source: ML conference proceedings conference paper supplement (https://openreview.net/forum?id=xg0fmtqh8d)
Supplement: supplementary_material [file 244_开润股份深度报告:箱包代工壁垒深厚,服装代工扬帆起航.xlsx]

## Sheet: Sheet
	2022A	2023A	2024E	2025E	2026E
毛利率	21.6%	24.4%	25.6%	25.9%	27.0%
销售净利率	1.7%	3.7%	7.6%	8.2%	9.4%
销售收入增长率	19.7%	13.3%	30.8%	24.4%	12.5%
EBIT 增长率	-1.3%	49.8%	66.8%	38.0%	27.7%
净利润增长率	-74.0%	146.5%	165.6%	35.6%	28.9%
ROE	2.7%	6.2%	14.6%	16.6%	17.6%
ROA	1.3%	3.2%	8.0%	9.1%	10.4%
ROIC	4.3%	7.1%	11.8%	13.5%	15.3%
EPS(X)	0.2	0.5	1.3	1.7	2.2
PE(X)	79.7	30.6	13.8	10.2	7.9
PB(X)	2.2	1.9	2.0	1.7	1.4
PS(X)	1.4	1.1	1.0	0.8	0.7
EV/EBITDA(X)	17.7	11.4	9.5	6.8	5.0
