# Supplementary material
Source: ML conference proceedings conference paper supplement (https://openreview.net/forum?id=xg0fmtqh8d)
Supplement: supplementary_material [file 245_卓胜微:射频前端芯片国内“一哥”,士别三日敢和思佳讯掰手腕]

## Sheet: Sheet
项目	本期发生额	上期发生额
工资薪酬	339,647,330.42	272,860,781.11
研发工程费	134,208,037.83	76,528,314.29
长期资产摊销	67,872,173.75	51,998,530.90
模具费	42,302,576.15	32,418,025.25
股份支付费用	25,478,080.36	7,830,956.28
办公费用	19,429,480.84	7,638,403.99
合计	628,937,669.35	449,275,011.82
