# Supplementary material
Source: ML conference proceedings conference paper supplement (https://openreview.net/forum?id=xg0fmtqh8d)
Supplement: supplementary_material [file 246_豪鹏科技首次覆盖报告:消费电池多元化布局,厚积薄发展新篇.xlsx]

## Sheet: Sheet
代码	证券简称	PE(2024E)	PE(2025E)	PE(2026E)	总市值(亿元)
688772.SH	珠海冠宇	21.22	14.46	10.99	159.36
300207.SZ	欣旺达	21.36	16.35	13.68	280.23
300014.SZ	亿纬锂能	17.15	13.63	11.27	841.52
	平均值	19.91	14.81	11.98
001283.SZ	豪鹏科技	22.39	8.29	6.01	33.82
