# Supplementary material
Source: ML conference proceedings conference paper supplement (https://openreview.net/forum?id=xg0fmtqh8d)
Supplement: supplementary_material [file 248_中国太保2024H1业绩点评:负债端延续高质量增长,红利和债市上涨驱动净利润超预期.xlsx]

## Sheet: Sheet
	评级	说明
证券评级	买入（Buy）	预计相对强于市场表现20%以上；
	增持（outperform）	预计相对强于市场表现5%～20%；
	中性（Neutral）	预计相对市场表现在－5%～＋5%之间波动；
	减持（underperform）	预计相对弱于市场表现5%以下。
行业评级	看好（overweight）	预计行业超越整体市场表现；
	中性（Neutral）	预计行业与整体市场表现基本持平；
	看淡（underperform）	预计行业弱于整体市场表现。
备注：评级标准为以报告日后的6~12个月内，证券相对于市场基准指数的涨跌幅表现，其中A股基准指数为沪深300指数、港股基准指数为恒生指数、新三板基准指数为三板成指（针对协议转让标的）或三板做市指数（针对做市转让标的）、美股基准指数为标普500或纳斯达克综合指数。我们在此提醒您，不同证券研究机构采用不同的评级术语及评级标准。我们采用的是相对评级体系，表示投资的相对比重建议；投资者买入或者卖出证券的决定取决于个人的实际情况，比如当前的持仓结构以及其他需要考虑的因素。投资者应阅读整篇报告，以获取比较完整的观点与信息，不应仅仅依靠投资评级来推断结论。
