# Supplementary material
Source: ML conference proceedings conference paper supplement (https://openreview.net/forum?id=xg0fmtqh8d)
Supplement: supplementary_material [file 252_能赚钱、肯分钱,实控人从未减持,生长激素行业老二安科生物:研发遇阻,不进则退,想要稳健谈何容易]

## Sheet: Sheet
收入(单位: 亿元)	2019	2020	2021	2022	2023H1
长效水针	5.42	6.99	14.69	23.50	14.39
收入YOY		29%	110%	60%	30%
收入占比	11.2%	12.1%	17.9%	23.0%	28.0%
