# Supplementary material
Source: ML conference proceedings conference paper supplement (https://openreview.net/forum?id=xg0fmtqh8d)
Supplement: supplementary_material [file 253_千禾味业投资探讨:拥抱极致性价比与下沉时代.xlsx]

## Sheet: Sheet
代码	简称	市值 (亿)	营业收入(亿元)			营业收入增速			归母净利润(亿元)			归母净利润增速			PE
			23A	24E	25E	23A	24E	25E	23A	24E	25E	23A	24E	25E	23A	24E	25E
603027.SH	千禾味业	114	32.07	33.93	38.06	+32%	+6%	+12%	5.3	5.51	6.38	+54%	+4%	+16%	30	20	17
603288.SH	海天味业	1973	245.59	270.85	298.62	-4%	+10%	+10%	56.27	62.27	68.74	-9%	+11%	+10%	38	32	29
600872.SH	中炬高新	128	51.39	55.7	61.32	-4%	+8%	+10%	16.97	7.25	8.84	+387%	-57%	+22%	13	18	15
603317.SH	天味食品	95	31.49	34.47	38.63	+17%	+10%	+12%	4.57	5.32	6	+34%	+17%	+13%	31	18	16
1579.HK	颐海国际	116	61.48	68.84	76.16	0%	+12%	+11%	8.53	8.57	9.90	+15%	+1%	+16%	13	12	11
