# Supplementary material
Source: ML conference proceedings conference paper supplement (https://openreview.net/forum?id=xg0fmtqh8d)
Supplement: supplementary_material [file 255_宁德时代发布磐石底盘,突破乘用车市场,预计24年SOP.xlsx]

## Sheet: Sheet
	2022A	2023A	2024E	2025E	2026E
营业总收入(百万元)	328,594	400,917	414,126	497,777	588,158
同比	152.07%	22.01%	3.29%	20.20%	18.16%
归母净利润(百万元)	30,729	44,121	46,334	56,784	70,488
同比	92.89%	43.58%	5.01%	22.55%	24.13%
EPS-最新摊薄(元/股)	6.99	10.03	10.53	12.91	16.02
P/E(现价&最新摊薄)	27.22	18.96	18.05	14.73	11.87
