# Supplementary material
Source: ML conference proceedings conference paper supplement (https://openreview.net/forum?id=xg0fmtqh8d)
Supplement: supplementary_material [file 256_科达利2024Q1业绩及美国建厂点评:业绩超预期,出海及机器人业务带来第二增长曲线.xlsx]

## Sheet: Sheet
	2022A	2023A	2024E	2025E	2026E
货币资金	2,242	1,899	4,444	5,935	8,049
应收和预付款项	2,864	2,704	4,175	5,219	6,785
存货	1,240	921	1,705	2,028	2,594
其他流动资产	1,155	3,660	2,296	2,685	3,267
流动资产合计	7,501	9,184	12,619	15,866	20,696
长期股权投资	0	0	0	0	0
投资性房地产	24	23	16	9	2
固定资产	5,016	6,446	8,178	9,598	10,706
在建工程	662	794	855	916	977
无形资产开发支出	408	410	533	657	780
长期待摊费用	73	144	144	144	144
其他非流动资产	8,007	9,405	12,954	16,273	21,175
资产总计	14,189	17,222	22,681	27,597	33,784
短期借款	1,816	423	1,780	3,136	4,493
应付和预收款项	4,283	3,987	6,266	7,833	10,306
长期借款	258	131	131	131	131
其他负债	2,005	2,169	2,503	2,612	2,779
负债合计	8,363	6,711	10,680	13,712	17,708
股本	234	270	270	270	270
资本公积	2,893	6,449	6,471	6,471	6,471
留存收益	2,414	3,544	5,017	6,868	9,019
归母公司股东权益	5,729	10,498	11,961	13,812	15,963
少数股东权益	98	13	40	74	113
股东权益合计	5,826	10,511	12,000	13,886	16,076
负债和股东权益	14,189	17,222	22,681	27,597	33,784
