# Supplementary material
Source: ML conference proceedings conference paper supplement (https://openreview.net/forum?id=xg0fmtqh8d)
Supplement: supplementary_material [file 257_本钢板B:2024年半年度报告(英文版).xlsx]

## Sheet: Sheet
Items	2024/06/30
	Account Receivable	Provision for bad debts	Bad debt ratio（%）
Within 1 year (inclusive)	1,244,814,190.60	12,448,141.92	1.00
1-2 years (inclusive)	95,955,967.70	9,595,596.77	10.00
2-3 years (inclusive)	10,390,321.55	2,078,064.31	20.00
3-4 years (inclusive)	561,144.95	561,144.95	100.00
4-5 years (inclusive)	748,799.87	748,799.87	100.00
over 5 years	50,369,793.11	50,369,793.11	100.00
Total	1,402,840,217.78	75,801,540.93
