# Supplementary material
Source: ML conference proceedings conference paper supplement (https://openreview.net/forum?id=xg0fmtqh8d)
Supplement: supplementary_material [file 258_深粮B:2024年半年度报告(英文版).xlsx]

## Sheet: Sheet
	Current period		Last period		y-o-y increase(+)/decrease(-)
	Amount	Ratio in operating income	Amount	Ratio in operating income
Total operating income	2,416,452,919.61	100%	2,831,996,801.82	100%	-14.67%
By industries
Wholesale and retail	1,516,982,535.46	62.78%	1,970,880,248.72	69.59%	-23.03%
Leasing and business services	490,757,531.22	20.31%	487,158,541.41	17.20%	0.74%
Manufacturing	408,712,852.93	16.91%	373,958,011.69	13.21%	9.29%
By products
Grain & oil trading and processing	1,739,184,083.86	71.97%	2,217,815,907.14	78.31%	-21.58%
Grain & oil storage logistics and services	427,474,421.05	17.69%	428,675,200.44	15.14%	-0.28%
Food, beverage and tea processing	186,511,304.53	7.72%	125,895,974.09	4.45%	48.15%
Leasing and others	63,283,110.17	2.62%	59,609,720.15	2.10%	6.16%
By region
Domestic market	2,399,676,960.09	99.31%	2,814,438,937.19	99.38%	-14.74%
Oversea market	16,775,959.52	0.69%	17,557,864.63	0.62%	-4.45%
