# Supplementary material
Source: ML conference proceedings conference paper supplement (https://openreview.net/forum?id=xg0fmtqh8d)
Supplement: supplementary_material [file 259_002506-协鑫集成-2024年半年度报告_2024-08-31.xlsx]

## Sheet: Sheet
项目	2024年半年度	2023年半年度
一、经营活动产生的现金流量：
销售商品、提供劳务收到的现金	3,404,896,611.93	2,214,430,898.83
收到的税费返还	109,128.84
收到其他与经营活动有关的现金	690,236,868.68	56,728,448.81
经营活动现金流入小计	4,095,242,609.45	2,271,159,347.64
购买商品、接受劳务支付的现金	2.51296e+09	1.75179e+09
支付给职工以及为职工支付的现金	1.10234e+07	8.06489e+06
支付的各项税费	2.06395e+07	355977
支付其他与经营活动有关的现金	9.18645e+08	3.90301e+08
经营活动现金流出小计	3.46326e+09	2.15051e+09
经营活动产生的现金流量净额	6.31979e+08	1.2065e+08
二、投资活动产生的现金流量：
收回投资收到的现金
取得投资收益收到的现金
处置固定资产、无形资产和其他长期资产收回的现金净额	97000
处置子公司及其他营业单位收到的现金净额	3.78322e+07	49382688
收到其他与投资活动有关的现金
投资活动现金流入小计	3.79292e+07	49382688
购建固定资产、无形资产和其他长期资产支付的现金	248678564	742600
投资支付的现金		100000000
取得子公司及其他营业单位支付的现金净额
支付其他与投资活动有关的现金		150000000
投资活动现金流出小计	248678564	250742600
投资活动产生的现金流量净额	-2.10749e+08	-201359912
三、筹资活动产生的现金流量：
吸收投资收到的现金
取得借款收到的现金		170000000
收到其他与筹资活动有关的现金	5.21637e+08	2.18317e+09
筹资活动现金流入小计	5.21637e+08	2.35317e+09
偿还债务支付的现金	140000000	310000000
分配股利、利润或偿付利息支付的现金	2.00792e+06	2.71614e+07
支付其他与筹资活动有关的现金	7.89289e+08	1.83088e+09
筹资活动现金流出小计	9.31297e+08	2.16804e+09
筹资活动产生的现金流量净额	-4.09659e+08	1.8513e+08
四、汇率变动对现金及现金等价物的影响	-18224.5	4.86052e+06
五、现金及现金等价物净增加额	11,552,070.84	109,281,346.42
加：期初现金及现金等价物余额	527,231,105.60	22,019,718.62
六、期末现金及现金等价物余额	538,783,176.44	131,301,065.04
