# Supplementary material
Source: ML conference proceedings conference paper supplement (https://openreview.net/forum?id=xg0fmtqh8d)
Supplement: supplementary_material [file 261_002532-天山铝业-2024年半年度报告_2024-08-20.xlsx]

## Sheet: Sheet
项目	2024年半年度
	归属于母公司所有者权益													少数股东权益	所有者权益合计
	股本	其他权益工具			资本公积	减：库存股	其他综合收益	专项储备	盈余公积	一般风险准备	未分配利润	其他	小计
		优先股	永续债	其他
一、上年期末余额	4,651,885,415.00				8,825,878,943.80	150,014,785.90	-11,168,197.52		940,439,966.50		9,849,927,890.96		24,106,949,232.84	2,041,449.38	24,108,990,682.22
加：会计政策变更
前期差错更正
其他
二、本年期初余额	4,651,885,415.00				8,825,878,943.80	150,014,785.90	-11,168,197.52		940,439,966.50		9,849,927,890.96		24,106,949,232.84	2,041,449.38	24,108,990,682.22
三、本期增减变动金额（减少以“—”号填列）						100,011,937.28	-10,050,450.96				1,381,137,310.13		1,271,074,921.89	1,988,549.92	1,273,063,471.81
（一）综合收益总额							-10,050,450.96				2,073,509,037.38		2,063,458,586.42	1,988,549.92	2,065,447,136.34
（二）所有者投入和减少资本						100,011,937.28							-100,011,937.28		-100,011,937.28
1．所有者投入的普通股						100,011,937.28							-100,011,937.28		-100,011,937.28
2．其他权益工具持有者投入资本
3．股份支付计入所有者权益的金额
4．其他
（三）利润分配											-692,371,727.25		-692,371,727.25		-692,371,727.25
1．提取盈余公积
2．提取一般风险准备
3．对所有者（或股东）的分配											-692,371,727.25		-692,371,727.25		-692,371,727.25
4．其他
（四）所有者权益内部结转
1．资本公积转增资本（或股本）
2．盈余公积转增资本（或股本）
3．盈余公积弥补亏损
4．设定受益计划变动额结转留存收益
5．其他综合收益结转留存收益
6．其他
（五）专项储备
1．本期提取								29,843,987.55					29,843,987.55		29,843,987.55
2．本期使用								29,843,987.55					29,843,987.55		29,843,987.55
（六）其他
四、本期期末余额	4,651,885,415.00				8,825,878,943.80	250,026,723.18	-21,218,648.48		940,439,966.50		11,231,065,201.09		25,378,024,154.73	4,029,999.30	25,382,054,154.03
