# Supplementary material
Source: ML conference proceedings conference paper supplement (https://openreview.net/forum?id=xg0fmtqh8d)
Supplement: supplementary_material [file 262_000950-重药控股_2024年一季度报告_2024-04-27.xlsx]

## Sheet: Sheet
利润表项目	本期数	上年同期数	增减比例	变动原因
营业收入	19,624,282,945.17	19,620,276,794.03	0.02%	（1）
销售费用	556,935,266.19	546,324,284.93	1.94%	（2）
管理费用	423,197,099.18	364,208,893.67	16.20%	（3）
财务费用	257,833,703.68	328,473,998.37	-21.51%	（4）
投资收益	86,719,317.32	69,531,348.46	24.72%	（5）
信用减值损失	-172,573,403.93	-140,957,446.36	22.43%	（6）
