# Supplementary material
Source: ML conference proceedings conference paper supplement (https://openreview.net/forum?id=xg0fmtqh8d)
Supplement: supplementary_material [file 264_600006-东风股份-东风汽车股份有限公司2024年半年度报告_2024-08-31.xlsx]

## Sheet: Sheet
衍生品投资类型	初始投资金额	期初账面价值	本期公允价值变动损益	计入权益的累计公允价值变动	报告期内购入金额	报告期内售出金额	期末账面价值	期末账面价值占公司报告期末净资产比例（%）
远期结售汇	/	12.77	-197.76	/	/	3,273.74	-188.31	-0.022
合计	/	12.77	-197.76	/	/	3,273.74	-188.31	-0.022
报告期内套期保值业务的会计政策、会计核算具体原则，以及与上一报告期相比是否发生重大变化的说明	无重大变化
报告期实际损益情况的说明	外币汇率以中国银行外汇牌价为查询依据，截止2024年6月远期结售汇损益合计为-197.76万元，其中已交割部分产生损益-9.45万，未交割部分损益为-188.31万。
套期保值效果的说明	借助远期结售汇这类汇率管理工具，通过提前锁定未来一段时间后的外币结汇汇率，避免市场外币汇率波动带来的风险。
衍生品投资资金来源	货物出口获得的国外经销商支付的外币货款。
报告期衍生品持仓的风险分析及控制措施说明（包括但不限于市场风险、流动性风险、信用风险、操作风险、法律风险等）	1.市场风险：外汇衍生品交易合约汇率、利率与到期日实际汇率、利率的差异将产生交易损益；在外汇衍生品的存续期内，以公允价值进行计量，每一会计期间将产生重估损益，至到期日重估损益的累计值等于交易损益。交易合约公允价值的变动与其对应的风险资产的价值变动形成一定的对冲，但仍有亏损的可能性。控制措施：公司及下属控股子公司开展的外汇衍生品交易以套期保值、规避和防范汇率、利率风险为目的，禁止任何风险投机行为；公司外汇衍生品交易额度不得超过经董事会或股东大会审议批准的授权额度。 2.流动性风险：不合理的外汇衍生品的购买安排可能引发公司资金的流动性风险。控制措施：公司及下属控股子公司开展的外汇衍生品交易以公司外汇资产、负债为依据，与实际外汇收支相匹配，适时选择合适的外汇衍生品，适当选择净额交割外汇衍生品，可保证在交割时拥有足额资金供清算，以减少到期日现金流需求。 3.履约风险：不合适的交易对方选择可能引发…
已投资衍生品报告期内市场价格或产品公允价值变动的情况，对衍生品公允价值的分析应披露具体使用的方法及相关假设与参数的设定	1.公允价值测算，公司将未到期交割的远期外汇合约按照期末金融机构远期外汇汇率（每月底针对未到期远期外汇合约向银行金融机构重新询价，作为测算公允价值变动依据）与签订的远期外汇协议中约定的外汇合约汇率的变动，计入公允价值变动损益和交易性金融资产或交易性金融负债； 2.合约交割日，将交割当日的外汇买入价与协议约定汇率的差异导致的损益变动计入投资收益，将交割当日的外汇买入价与外汇中间价的差异导致的损益变动计入财务费用，同时将已确认的公允价值变动损益转出。
涉诉情况（如适用）	不适用
衍生品投资审批董事会公告披露日期（如有）	2024年4月13日
衍生品投资审批股东会公告披露日期（如有）	不适用
