# Supplementary material
Source: ML conference proceedings conference paper supplement (https://openreview.net/forum?id=xg0fmtqh8d)
Supplement: supplementary_material [file 265_宜宾五粮液股份有限公司2024年半年度报告(英文版).xlsx]

## Sheet: Sheet
Item	Closing balance	Opening balance
Letters of credit	3,650,281.25
Total	3,650,281.25
