# Supplementary material
Source: ML conference proceedings conference paper supplement (https://openreview.net/forum?id=xg0fmtqh8d)
Supplement: supplementary_material [file 266_大众公用:2024年第一季度报告.xlsx]

## Sheet: Sheet
股東名稱	股東性質	持股數量	持股比例(%)	持有有限售條件股份數量	質押、標記或凍結情況
					股份狀態	數量
香港中央結算(代理人)有限公司	境外法人	533,553,000	18.07	0	未知	—
上海大眾企業管理有限公司	境內非國有法人	495,143,859	16.77	0	質押	352,000,000
上海燃氣(集團)有限公司	國有法人	153,832,735	5.21	0	無	—
香港中央結算有限公司	境外法人	11,992,582	0.41	0	無	—
招商銀行股份有限公司—南方中證1000交易型開放式指數證券投資基金	其他	8,392,518	0.28	0	無	—
蔡志雙	境內自然人	8,389,035	0.28	0	無	—
易繼成	境內自然人	8,284,850	0.28	0	無	—
林澤華	境內自然人	7,020,258	0.24	0	無	—
施福龍	境內自然人	6,900,900	0.23	0	無	—
丁秀敏	境內自然人	5,727,500	0.19	0	無	—
