# Supplementary material
Source: ML conference proceedings conference paper supplement (https://openreview.net/forum?id=xg0fmtqh8d)
Supplement: supplementary_material [file 267_兴发铝业:中期报告2024.xlsx]

## Sheet: Sheet
董事姓名	身份	本公司普通股數目	於二零二四年六月三十日佔本公司股權百分比
廖玉慶	全權信託創立人,可影響受託人行使其酌情權之方式	48,200,100	11.46%
羅用冠	實益擁有人	19,432,000	4.62%
	配偶權益	1,719,000	0.41%
王志華	實益擁有人	128,000	0.03%
