# Supplementary material
Source: ML conference proceedings conference paper supplement (https://openreview.net/forum?id=xg0fmtqh8d)
Supplement: supplementary_material [file 268_600233-圆通速递-圆通速递股份有限公司2024年半年度报告_2024-08-28.xlsx]

## Sheet: Sheet
分行业情况
分行业	成本构成项目	本期金额	本期占总成本比例(%)	上年同期金额	上年同期占总成本比例(%)	本期金额较上年同期变动比例(%)	情况说明
快递行业	派送服务支出	1,551,251.69	53.09	1,258,407.29	52.41	23.27	主要系快递业务量增长带来成本增加所致
	运输成本	527,639.16	18.06	462,556.62	19.27	14.07	主要系快递业务量增长带来成本增加所致
	中心操作成本	338,732.65	11.59	296,062.90	12.33	14.41	主要系快递业务量增长带来成本增加所致
	网点中转费	144,518.85	4.95	109,423.21	4.56	32.07	主要系快递业务量增长带来成本增加所致
	面单成本	18,277.65	0.63	15,284.74	0.64	19.58	主要系快递业务量增长带来成本增加所致
	增值服务支出	10,816.69	0.37	5,212.30	0.22	107.52	主要系增值服务业务量增加所致
	其他	28,829.42	0.99	23,599.98	0.98	22.16	主要系系统运营、短信及通讯成本增加所致
	快递行业成本合计	2,620,066.11	89.66	2,170,547.03	90.40	20.71
货代行业	空运	144,595.89	4.95	96,387.63	4.01	50.01	主要系空运业务量增加所致
	海洋货运	31,819.93	1.09	22,650.76	0.94	40.48	主要系海洋货运业务量增加及价格上涨所致
	仓储和物流	3,348.74	0.11	2,042.87	0.09	63.92	主要系仓储和物流业务量增加所致
	其他	3,546.09	0.12	6,022.38	0.25	-41.12	主要系火车运输业务减少所致
	货代行业成本合计	183,310.66	6.27	127,103.65	5.29	44.22
航空业务	航空业务	87,940.54	3.01	67,258.37	2.80	30.75	主要系航空业务增加所致
其他行业	其他	2,365.01	0.08	1,155.09	0.05	104.75	主要系日用百货销售业务增加所致
