# Supplementary material
Source: ML conference proceedings conference paper supplement (https://openreview.net/forum?id=xg0fmtqh8d)
Supplement: supplementary_material [file 269_600226-亨通股份-浙江亨通控股股份有限公司2024年半年度报告_2024-08-23.xlsx]

## Sheet: Sheet
项目	期末余额	期初余额
增值税	1,088,161.20	1,090,824.65
企业所得税	17,150,233.70	20,684,197.28
个人所得税	283,984.43	311,076.84
城市维护建设税	103,309.83	63,723.74
房产税	1,418,906.84	2,679,084.33
土地使用税	820,276.21	1,640,563.51
印花税	118,191.78	97,402.83
教育费附加	61,985.90	38,234.24
地方教育附加	41,323.92	25,489.49
环境保护税	19,608.45	11,461.44
可再生能源发展基金	94,175.90	78,359.46
国家重大水利工程建设基金收入	20,431.14	16,848.16
合计	21,220,589.30	26,737,265.97
