# Supplementary material
Source: ML conference proceedings conference paper supplement (https://openreview.net/forum?id=xg0fmtqh8d)
Supplement: supplementary_material [file 270_600482-中国动力-中国船舶重工集团动力股份有限公司2024年半年度报告_2024-08-31.xlsx]

## Sheet: Sheet
主要污染物及特征污染物名称		排放方式	排放口数量	分布情况	排放浓度和总量	超标情况	污染物排放标准	核定的排放总量
废气	烟粉尘	通过烟囱高空排放	19	熔炼、喷抛丸、开箱、砂处理等作业产生粉尘烟尘，共19个排放口	排放浓度：12.8mg/m3总量：8.217吨	无	熔炼炉执行标准：《工业炉窑大气污染物排放标准》DB31/860—2014，排放限值：20mg/m3其他作业执行标准：《大气污染物综合排放标准》DB31/933—2015，排放限值：30mg/m3	34.1吨
	氮氧化物		7	主要是5个退火炉、1个加热炉、1个泥芯烘炉	排放浓度：85mg/m3总量：2.22吨	无	《工业炉窑大气污染物排放标准》DB31/860—2014排放限值：NOx:200mg/m3	10.046吨
	二氧化硫		7	主要是5个退火炉、1个加热炉、1个泥芯烘炉	排放浓度：<3mg/m3总量：0.142吨	无	《工业炉窑大气污染物排放标准》DB31/860—2014排放限值：SO:100mg/m32	0.642吨
	非甲烷总烃		2	两个油漆间	排放浓度：5.74mg/m3总量：2.18吨	无	《大气污染物综合排放标准》DB31/933—2015排放限值：非甲烷总烃（VOCs):70mg/m3	8.16吨
废水	COD	纳管排放	5	厂区周边5个排放口	排放浓度：162mg/L总量：2.22吨	无	《污水综合排放标准》（DB31/199-2018）表2三级标准排放限值：化学需氧量（COD）：500mg/L	/
	氨氮		5	厂区周边5个排放口	排放浓度：25.74mg/L总量：0.013吨	无	《污水综合排放标准》（DB31/199-2018）表2三级标准排放限值：氨氮：40mg/L	/
固体废物	危险废物	委托处置	/	主要为油漆间、生产车间	总量：29.1吨	合规处置	《固体废物污染环境防治法》	/
	一般工业固体废物	委托处置	/	各车间、办公区域	总量：5626吨	合规处置	《固体废物污染环境防治法》	/
噪声	噪声	厂区直接排放	/	整个厂区	厂界昼间：58分贝厂界夜间：54分贝	无	《工业企业厂界噪声标准》GB12348-2008)厂界昼间：65分贝厂界夜间：55分贝	/
