# Supplementary material
Source: ML conference proceedings conference paper supplement (https://openreview.net/forum?id=xg0fmtqh8d)
Supplement: supplementary_material [file 271_600482-中国动力-中国船舶重工集团动力股份有限公司2024年半年度报告_2024-08-31.xlsx]

## Sheet: Sheet
主要污染物及特征污染物名称		排放方式	排放口数量	分布情况	排放浓度和总量	超标情况	污染物排放标准	核定的排放总量
废水	悬浮物	间断排放	2	厂区排口入清苑区污水处理厂	浓度：51mg/L总量：14.29t/a	无	400mg/L	14.29t/a
	COD				浓度：37mg/L总量：18.75t/a	无	500mg/L	18.75t/a
	石油类				浓度：0.08mg/L总量：0.013t/a	无	15mg/L	0.013t/a
	氨氮				浓度：1.35mg/L总量：2.83t/a	无	45mg/L	2.83t/a
