# Supplementary material
Source: ML conference proceedings conference paper supplement (https://openreview.net/forum?id=xg0fmtqh8d)
Supplement: supplementary_material [file 272_京东方B:2024年半年度报告(英文版).xlsx]

## Sheet: Sheet
Item	Ending balance	Beginning balance
Interest on long-term borrowings with interest paid by installment and principal paid at maturity	0.00	0.00
Interest on corporate bonds	0.00	0.00
Interest payable on short-term borrowings	187,914.00	175,698.00
Divided as financial liabilities such as preferred shares and perpetual bonds	0.00	0.00
Others	0.00	0.00
Total	187,914.00	175,698.00
