# Supplementary material
Source: ML conference proceedings conference paper supplement (https://openreview.net/forum?id=xg0fmtqh8d)
Supplement: supplementary_material [file 273_粤电力B:2024年半年度报告(英文版).xlsx]

## Sheet: Sheet
Name	Recognized dividend income	Accumulating gains	Accumulating losses	Amount of other comprehens ive income transferred to retained earning	Reasons for being measured at fair value and whose changes are included in other comprehensive income	Reasons for other comprehensive income transferred to retained earnings
Xinjiang Yuejian Nengxin Energy Equipment Co., Ltd.		0			Consideration of strategic investments	Not applicable
Shenzhen Capital Group Co., Ltd.	24,756,020	685,966,001			Consideration of strategic investments	Not applicable
Shenzhen Energy Co., Ltd.	2,116,800	94,485,372			Consideration of strategic investments	Not applicable
Shanghai Shenergy Group	22,212,900	254,511,778			Consideration of strategic investments	Not applicable
Sunshine Insurance Group Co., Ltd.	63,000,000	452,178,142			Consideration of strategic investments	Not applicable
GMG International Tendering Co., Ltd.	504,000	5,904,000			Consideration of strategic investments	Not applicable
Gaozhou Yawu Hydropower Co., Ltd		0			Consideration of strategic investments	Not applicable
