# Supplementary material
Source: ML conference proceedings conference paper supplement (https://openreview.net/forum?id=xg0fmtqh8d)
Supplement: supplementary_material [file 274_600248-陕建股份_陕西建工集团股份有限公司2024年第一季度报告_2024-04-30.xlsx]

## Sheet: Sheet
报告期末普通股股东总数	56,123	报告期末表决权恢复的优先股股东总数（如有）			/
前10名股东持股情况（不含通过转融通出借股份）
股东名称	股东性质	持股数量	持股比例(%)	持有有限售条件股份数量	质押、标记或冻结情况
					股份状态	数量
陕西建工控股集团有限公司	国有法人	2,498,774,923	66.30	0	无	0
陕西延长石油（集团）有限责任公司	国有法人	163,498,712	4.34	0	无	0
陕西建工实业有限公司	国有法人	22,300,292	0.59	0	无	0
夏重阳	境内自然人	22,200,000	0.59	0	无	0
香港中央结算有限公司	境外法人	18,173,231	0.48	0	无	0
中国对外经济贸易信托有限公司－外贸信托－仁桥泽源股票私募证券投资基金	其他	13,988,940	0.37	0	无	0
陕西延化工程建设有限责任公司	国有法人	12,520,326	0.33	0	无	0
张素芬	境内自然人	10,600,000	0.28	0	无	0
交通银行股份有限公司－广发中证基建工程交易型开放式指数证券投资基金	其他	8,452,900	0.22	0	无	0
招商银行股份有限公司－南方中证1000交易型开放式指数证券投资基金	其他	6,530,000	0.17	0	无	0
前10名无限售条件股东持股情况
股东名称	持有无限售条件流通股的数量			股份种类及数量
				股份种类	数量
陕西建工控股集团有限公司	2,498,774,923			人民币普通股	2,498,774,923
陕西延长石油（集团）有限责任公司	163,498,712			人民币普通股	163,498,712
陕西建工实业有限公司	22,300,292			人民币普通股	22,300,292
夏重阳	22,200,000			人民币普通股	22,200,000
香港中央结算有限公司	18,173,231			人民币普通股	18,173,231
中国对外经济贸易信托有限公司－外贸信托－仁桥泽源股票私募证券投资基金	13,988,940			人民币普通股	13,988,940
陕西延化工程建设有限责任公司	12,520,326			人民币普通股	12,520,326
张素芬	10,600,000			人民币普通股	10,600,000
交通银行股份有限公司－广发中证基建工程交易型开放式指数证券投资基金	8,452,900			人民币普通股	8,452,900
招商银行股份有限公司－南方中证1000交易型开放式指数证券投资基金	6,530,000			人民币普通股	6,530,000
上述股东关联关系或一致行动的说明	上述股东中，陕西建工实业有限公司是陕西建工控股集团有限公司的子公司；陕西延化工程建设有限责任公司是陕西延长石油（集团）有限责任公司的全资子公司。除此之外，未知其他股东是否存在关联关系或属于一致行动人
前10名股东及前10名无限售股东参与融资融券及转融通业务情况说明（如有）	交通银行股份有限公司－广发中证基建工程交易型开放式指数证券投资基金、招商银行股份有限公司－南方中证1000交易型开放式指数证券投资基金两名股东参与转融通业务情况如下表所示
