# Supplementary material
Source: ML conference proceedings conference paper supplement (https://openreview.net/forum?id=xg0fmtqh8d)
Supplement: supplementary_material [file 276_粤高速B:2024年半年度报告(英文版).xlsx]

## Sheet: Sheet
Name of the Company Invested	Main Business	Investment Way	Investment Amount	Share Proportion %	Capital Source	Partner	Investment Horizon	Product Type	Progress up to Balance Sheet Date	Anticipated Income	Gain or Less or the Current Investment	Whether to Involve in Lawsuit	Date of Disclosure	Disclosure Index
Guangdong Jiangzhong Expressway Co., Ltd.	Expressway	Increase capital	31,500,000.00	15.00%	Self funds	Xinyue (Guangzhou) Investment Co., Ltd., Guangdong Highway Construction Co., Ltd.	On the basis of the term of operation approved by the government	Expressway	Completed			No	July 31,2021	Resolutions of the 20th (Provisional) Meeting of the Ninth Board of Directors
Zhaoqing Yuezhao Higyway Co., Ltd.	Expressway	Increase capital	142,000,000.00	25.00%	Self funds	Guangdong Road & Bridge Construction Development Co., Ltd., Zhaoqing Highway Development Co., Ltd.,Xunhao International Co., Ltd.	On the basis of the term of operation approved by the government	Expressway	Completed			No	October 21,2023	Resolutions of the 13th (Provisional) Meeting of the Tenth Board of Directors
Total	--	--	173,500,000.00	--	--	--	--	--	--	0.00	0.00	--	--	--
