# Supplementary material
Source: ML conference proceedings conference paper supplement (https://openreview.net/forum?id=xg0fmtqh8d)
Supplement: supplementary_material [file 277_煜盛文化:2024中期报告.xlsx]

## Sheet: Sheet
	附註	於2024年6月30日人民幣千元(未經審核)	於2023年12月31日人民幣千元(未經審核)
非流動資產
物業及設備	6(b)	136	148
非流動資產總值		136	148
流動資產
電視節目投資		178,140	178,140
節目版權	7	140,940	140,940
貿易應收款項	8	252,267	252,267
預付款項及其他應收款項	9	2,784	2,328
現金及現金等價物		103	97
流動資產總值		574,234	573,772
流動負債
銀行貸款		55,076	55,076
合約負債		59,506	59,506
貿易應付款項	10	34,078	34,078
應計費用及其他應付款項	11	227,761	219,129
租賃負債		3,104	2,702
即期稅項		107,211	107,219
流動負債總額		486,736	477,710
流動資產淨值		87,498	96,062
總資產減流動負債		87,634	96,210
非流動負債
租賃負債		1,762	2,092
遞延稅項負債		22,209	22,209
非流動負債總額		23,971	24,301
資產淨值		63,663	71,909
權益
股本		73	73
儲備		63,590	71,836
總權益		63,663	71,909
