# Supplementary material
Source: ML conference proceedings conference paper supplement (https://openreview.net/forum?id=xg0fmtqh8d)
Supplement: supplementary_material [file 278_兖煤澳大利亚:季度报告截至2023年6月30日止季度.xlsx]

## Sheet: Sheet
			2024年第二季度	2024年第一季度	環比增減	2023年第二季度	同比增減	2024年前6個月	2023年前6個月	同比增減
原煤產量，百萬噸	煤礦類型	經濟利益
莫拉本	露天╱井工	95%	4.9	6.0	(18)%	6.0	(18)%	10.9	9.1	20%
沃克山	露天	83.6%	4.2	3.4	24%	4.3	(2)%	7.6	7.6	—%
亨特谷	露天	51%	2.7	2.3	17%	3.1	(13)%	5.0	5.8	(14)%
雅若碧	露天	100%	0.5	0.5	—%	0.5	—%	1.0	1.1	(9)%
中山	露天	49.9997%	0.9	1.0	(10)%	0.7	29%	1.9	1.4	36%
艾詩頓	井工	100%	0.7	0.7	—%	0.1	600%	1.4	0.6	133%
斯特拉福德╱杜拉里	露天	100%	0.0	0.1	(100)%	0.1	(100)%	0.1	0.4	(75)%
總計-按100%基準計			13.9	14.0	(1)%	14.8	(6)%	27.9	26.0	7%
總計-權益			10.8	11.0	(2)%	11.7	(8)%	21.8	20.0	9%
商品煤產量，百萬噸	煤炭類型	權益份額
莫拉本	動力煤	95%	4.5	5.0	(10)%	4.8	(6)%	9.5	7.4	28%
沃克山	冶金煤、動力煤	83.6%	2.5	2.2	14%	2.6	(4)%	4.7	4.6	2%
亨特谷	冶金煤、動力煤	51%	2.0	2.8	(29)%	2.4	(17)%	4.8	4.2	14%
雅若碧	冶金煤、動力煤	100%	0.4	0.4	—%	0.5	(20)%	0.8	0.9	(11)%
中山	冶金煤、動力煤	(權益入賬)	0.6	0.5	20%	0.5	20%	1.1	1.0	10%
艾詩頓	冶金煤	100%	0.3	0.3	—%	0.0	n/a	0.6	0.3	100%
斯特拉福德╱杜拉里	冶金煤、動力煤	100%	0.0	0.1	(100)%	0.1	(100)%	0.1	0.2	(50)%
總計-按100%基準計			10.3	11.3	(9)%	10.9	(6)%	21.6	18.6	16%
總計-權益			8.2	8.8	(7)%	8.5	(4)%	17.0	14.4	18%
銷量，百萬噸
動力煤			7.5	7.3	3%	7.3	3%	14.8	12.0	24%
冶金煤			1.0	1.0	—%	1.2	(17)%	2.0	2.4	(17)%
總計-權益			8.6	8.3	4%	8.5	1%	16.9	14.4	18%
平均銷售價格,澳元╱噸
動力煤			163	159	2%	197	(17)%	159	256	(37)%
冶金煤			318	334	(5)%	403	(21)%	334	389	(16)%
整體平均銷售價格			181	180	1%	226	(20)%	180	278	(35)%
