# Supplementary material
Source: ML conference proceedings conference paper supplement (https://openreview.net/forum?id=xg0fmtqh8d)
Supplement: supplementary_material [file 279_600350-山东高速_山东高速股份有限公司2024年第一季度报告_2024-04-30.xlsx]

## Sheet: Sheet
项目	本报告期	上年同期		本报告期比上年同期增减变动幅度(%)
		调整前	调整后	调整后
营业收入	4,531,518,433.04	4,420,702,472.64	5,141,672,216.48	-11.87
归属于上市公司股东的净利润	769,351,693.51	810,493,602.27	824,557,107.32	-6.70
归属于上市公司股东的扣除非经常性损益的净利润	730,353,153.07	789,011,406.34	789,011,406.34	-7.43
经营活动产生的现金流量净额	1,032,081,171.42	1,173,804,196.03	957,838,666.95	7.75
基本每股收益（元/股）	0.129	0.143	0.146	-11.64
稀释每股收益（元/股）	0.129	0.142	0.145	-11.03
加权平均净资产收益率（%）	2.12	2.3	2.23	减少0.11个百分点
	本报告期末	上年度末		本报告期末比上年度末增减变动幅度(%)
		调整前	调整后	调整后
总资产	153,410,578,588.87	151,719,888,222.33	151,719,888,222.33	1.11
归属于上市公司股东的所有者权益	42,393,177,210.45	41,704,545,938.97	41,704,545,938.97	1.65
