# Supplementary material
Source: ML conference proceedings conference paper supplement (https://openreview.net/forum?id=xg0fmtqh8d)
Supplement: supplementary_material [file 280_600482-中国动力-中国船舶重工集团动力股份有限公司2024年半年度报告_2024-08-31.xlsx]

## Sheet: Sheet
主要污染物及特征污染物名称		排放方式	排放口数量	分布情况	排放浓度和总量	超标情况	污染物排放标准	核定的排放总量
废气	氮氧化物	无组织排放	无	无	浓度：0.075mg/m³总量：——	无	0.12mg/m³	——
	颗粒物			无	浓度：0.248mg/m³总量：——	无	1mg/m³	——
	非甲烷总烃			无	浓度：0.14mg/m³总量：——	无	4mg/m³	——
废水	COD	总排口排放	1	厂区总排口入污水处理厂	浓度：131mg/L总量：——	无	500mg/L	——
	氨氮				浓度：33mg/L总量：——	无	——	——
