# Supplementary material
Source: ML conference proceedings conference paper supplement (https://openreview.net/forum?id=xg0fmtqh8d)
Supplement: supplementary_material [file 281_旷世芳香:二零二四年中期报告.xlsx]

## Sheet: Sheet
			Six months ended 30 June截至6 月30 日止六個月
			2024	2023
		Notes附註	2024年RMB’000人民幣千元(Unaudited)(未經審核)	2023年RMB’000人民幣千元(Unaudited)(未經審核)
Revenue	收入	7	334,205	302,076
Cost of sales	銷售成本		(252,700)	(235,313)
Gross profit	毛利		81,505	66,763
Administrative expenses	行政開支		(43,396)	(29,110)
Selling and marketing expenses	銷售及營銷開支		(19,043)	(17,391)
Net impairment losses on financial assets	金融資產減值虧損淨額		(3,882)	1,844
Other income	其他收益	8	5,409	3,339
Other gains, net	其他收益淨額	9	29,978	12,435
Operating profit	經營溢利		50,571	37,880
Finance income	財務收益		8,555	1,580
Finance costs	財務成本		(523)	(2,682)
Finance costs, net	財務成本-淨額	10	8,032	(1,102)
Profit before income tax	除所得稅前溢利		58,603	36,778
Income tax expenses	所得稅開支	11	(7,694)	(6,295)
Profit for the period	期內溢利		50,909	30,483
Profit for the period attributable to:	以下應佔期內溢利:
Owners of the Company	本公司擁有人		50,881	30,459
Non-controlling interests	非控股權益		28	24
Other comprehensive income:	其他全面收益：
Items that maybe reclassified subsequently to profit or loss	隨後可重新分類至損益之項目
Exchange differences on translation of foreign operations	換算海外業務之匯兌差額		–	57
Total comprehensive income for the period	期內全面收益總額		50,909	30,540
Total comprehensive income attributable to:	以下應佔全面收益總額：
Owners of the Company	本公司擁有人		50,881	30,505
Non-controlling interests	非控股權益		28	35
Earnings per share for profit attributable to owners of the Company	本公司擁有人應佔之溢利之每股盈利
– Basis and diluted (expressed in RMB cents)	－基本及攤薄（按人民幣分表示）	12	12.6	7.5
