# Supplementary material
Source: ML conference proceedings conference paper supplement (https://openreview.net/forum?id=xg0fmtqh8d)
Supplement: supplementary_material [file 282_方大B:2024年半年度报告(英文版).xlsx]

## Sheet: Sheet
Item	Change	Reason
Project funds collected in advance	36,532,733.33	Increased due to the advance payment for engineering contracting contracts.
Material payment and house sale payment.	-17,673,842.54	Decreased due to the reduction of advance payment for material purchase
Total	18,858,890.79
