# Supplementary material
Source: ML conference proceedings conference paper supplement (https://openreview.net/forum?id=xg0fmtqh8d)
Supplement: supplementary_material [file 283_粤照明B:2024年半年度报告(英文版).xlsx]

## Sheet: Sheet
Sources	Reporting Period	Same period of last year
Financial assets held for trading	-601,447.40	905,952.44
Trading financial liabilities		-23,059,475.00
Total	-601,447.40	-22,153,522.56
