# Supplementary material
Source: ML conference proceedings conference paper supplement (https://openreview.net/forum?id=xg0fmtqh8d)
Supplement: supplementary_material [file 284_东山精密:2024年半年度报告(英文版).xlsx]

## Sheet: Sheet
	The reporting period		The same period of the previous year		Y/Y % change
	Amount	% of operating revenue	Amount	% of operating revenue
Total operating revenue	16,628,586,195.56	100%	13,667,087,825.06	100%	21.67%
By segment
Computer, communication and others	16,521,772,107.69	99.36%	13,595,558,213.91	99.48%	21.52%
Others	106,814,087.87	0.64%	71,529,611.15	0.52%	49.33%
By product
PCBs	10,850,236,100.11	65.25%	8,972,283,939.36	65.65%	20.93%
LED display devices	437,960,520.69	2.63%	419,906,375.52	3.07%	4.30%
Touch panels and LCMs	3,122,349,556.40	18.78%	2,218,634,131.10	16.23%	40.73%
Precision components	2,111,225,930.49	12.70%	1,984,733,767.93	14.52%	6.37%
Others	106,814,087.87	0.64%	71,529,611.15	0.52%	49.33%
By region
Domestic market	3,206,081,274.20	19.28%	2,663,920,474.21	19.49%	20.35%
Overseas market	13,422,504,921.36	80.72%	11,003,167,350.85	80.51%	21.99%
