# Supplementary material
Source: ML conference proceedings conference paper supplement (https://openreview.net/forum?id=xg0fmtqh8d)
Supplement: supplementary_material [file 285_新和成:2024年第一季度报告(英文版).xlsx]

## Sheet: Sheet
Items	Mar 31, 2024	Jan 1, 2024
Current assets:
Cash and bank balances	4,677,644,526.84	4,543,361,146.98
Settlement funds
Loans to other banks
Held-for-trading financial assets	2,917,816.05	173,056,050.95
Derivative financial assets
Notes receivable	133,900,672.52	116,125,267.70
Accounts receivable	2,866,535,904.66	2,483,266,952.88
Receivables financing	575,769,257.90	331,634,090.61
Advances paid	170,031,305.71	209,274,602.05
Premiums receivable
Reinsurance accounts receivable
Reinsurance reserve receivable
Other receivables	158,814,076.21	142,060,705.67
Including:Interest receivable
Dividend receivable
Financial assets under reverse repo
Inventories:	4,432,336,504.68	4,318,878,875.34
Including: data resources
Contract assets
Assets held for sale
Non-current assets due within one year
Other current assets	39,050,490.75	68,232,745.03
Total current assets	13,057,000,555.32	12,385,890,437.21
Non-current assets:
Loans and advances
Debt investments
Other debt investments
Long-term receivables
Long-term equity investments	702,698,863.06	697,145,200.08
Other equity instrument investments	22,998,147.55	22,998,147.55
Other non-current financial assets
Investment property
Fixed assets	21,806,911,019.52	21,860,082,637.13
Construction in progress	1,476,791,865.63	1,621,882,507.56
Productive biological assets
Oil & gas assets
Right-of-use assets	6,151,209.56	6,603,631.56
Intangible assets	2,390,936,771.75	2,407,560,753.82
Including: data resources
Development expenditures
Including: data resources
Goodwill	3,622,704.97	3,622,704.97
Long-term prepayments	13,106,789.39	11,697,961.72
Deferred tax assets	4,330,941.02	650,079.18
Other non-current assets	133,991,537.91	138,112,803.89
Total non-current assets	26,561,539,850.36	26,770,356,427.46
Total assets	39,618,540,405.68	39,156,246,864.67
Current liabilities:
Short-term borrowings	1,036,760,556.16	1,235,688,062.90
Central bank loans
Loans from other banks
Held-for-trading financial liabilities
Derivative financial liabilities
Notes payable	397,764,557.87	349,347,472.36
Accounts payable	1,688,031,148.30	1,930,958,598.05
Advances received
Contract liabilities	178,321,443.97	251,008,240.97
Financial liabilities under repo
Absorbing deposit and interbank deposit
Deposit for agency security transaction
Deposit for agency security underwriting
Employee benefits payable	212,888,730.14	418,273,203.88
Taxes and rates payable	288,171,117.75	301,794,080.40
Other payables	38,421,805.70	53,671,773.90
Including: Interest payable
Dividend payable
Handling fee and commission
payable
Reinsurance accounts payable
Liabilities held for sale
Non-current liabilities due within one year	1,038,520,760.69	1,564,392,458.67
Other current liabilities	19,380,141.84	17,260,124.76
Total current liabilities	4,898,260,262.42	6,122,394,015.89
Non-current liabilities:
Insurance policy reserve
Long-term borrowings	7,625,324,455.80	6,821,643,194.58
Bonds payable
Including: Preferred shares
Perpetual bonds
Lease liabilities	4,895,825.27	5,240,136.43
Long-term payables
Long-term employee benefits payable
Provisions
Deferred income	1,051,572,404.48	1,065,586,274.49
Deferred tax liabilities	234,514,495.48	221,675,090.41
Other non-current liabilities
Total non-current liabilities	8,916,307,181.03	8,114,144,695.91
Total liabilities	13,814,567,443.45	14,236,538,711.80
Equity:
Share capital	3,090,907,356.00	3,090,907,356.00
Other equity instruments
Including: Preferred shares
Perpetual bonds
Capital reserve	3,613,332,107.69	3,613,345,485.13
Less: Treasury shares	500,059,711.25	500,059,711.25
Other comprehensive income	101,866,684.29	103,920,732.85
Special reserve	76,747,169.45	60,860,818.76
Surplus reserve	1,545,453,678.00	1,545,453,678.00
General risk reserve
Undistributed profit	17,759,856,885.46	16,890,233,961.50
Total equity attributable to the parent company	25,688,104,169.64	24,804,662,320.99
Non-controlling interest	115,868,792.59	115,045,831.88
Total equity	25,803,972,962.23	24,919,708,152.87
Total liabilities & equity	39,618,540,405.68	39,156,246,864.67
