# Supplementary material
Source: ML conference proceedings conference paper supplement (https://openreview.net/forum?id=xg0fmtqh8d)
Supplement: supplementary_material [file 288_安道麦B:2024年半年度报告(英文版).xlsx]

## Sheet: Sheet
	Notes	June 30 2024	December 31 2023
Current assets
Cash at bank and on hand	XV.1	72,509	163,646
Accounts receivable	XV.2	1,013,459	1,141,839
Receivables financing	XV.3	25,125	7,929
Prepayments		7,383	10,233
Other receivables	XV.4	11,611	11,611
Inventories		235,078	218,984
Non-current assets due within one year		-	125,000
Other current assets		9,127	7,574
Total current assets		1,374,292	1,686,816
Non-current assets
Long-term equity investments	XV.5	17,430,716	17,430,716
Other equity investments		54,299	54,299
Investment properties		2,345	2,619
Fixed assets		1,604,248	1,711,062
Construction in progress		70,253	56,791
Right-of-use assets		1,661	1,877
Intangible assets		243,178	249,236
Deferred tax assets		28,827	80,241
Other non-current assets		207,068	273,783
Total non-current assets		19,642,595	19,860,624
Total assets		21,016,887	21,547,440
Current liabilities
Short-term loans		100,000	100,000
Bills payables
Accounts payables		34,242 144,343	64,588
Contract liabilities		6,415	150,265 12,190
Employee benefits payable		5,411	12,091
Taxes payable		2,039	4,852
Other payables		703,247	619,857
Non-current liabilities due within one year		415,808	537,820
Total current liabilities		1,411,505	1,501,663
Non-current liabilities
Long-term loans		575,971	949,017
Lease liabilities		962	885
Long-term employee benefits payable		100,500	101,628
Provisions		25,227	26,116
Other non-current liabilities		225,400	269,500
Total non-current liabilities		928,060	1,347,146
Total liabilities		2,339,565	2,848,809
Shareholders’ equity
Share capital	V.37	2,329,812	2,329,812
Capital reserve		15,523,881	15,523,881
Other comprehensive income		(1,002)	(1,002)
Special reserves		8,789	17,286
Surplus reserve	V.40	273,617	273,617
Retained earnings		542,225	555,037
Total shareholders’ equity		18,677,322	18,698,631
Total liabilities and shareholders’ equity		21,016,887	21,547,440
