# Supplementary material
Source: ML conference proceedings conference paper supplement (https://openreview.net/forum?id=xg0fmtqh8d)
Supplement: supplementary_material [file 289_深物业B:2024年半年度报告(英文版).xlsx]

## Sheet: Sheet
Aging	Ending carrying amount	Beginning carrying amount
Within one year (including 1 year)	7,607,457.17	39,565,801.00
One to two years	26,259,438.44	11,760,542.45
Two to three years	47,399,167.36	571,247,946.92
More than three years	628,434,708.45	96,450,446.01
Three to four years	534,058,256.56	31,254,533.77
Four to five years	31,301,783.20	1,068,702.68
Over 5 years	63,074,668.69	64,127,209.56
Total	709,700,771.42	719,024,736.38
