# Supplementary material
Source: ML conference proceedings conference paper supplement (https://openreview.net/forum?id=xg0fmtqh8d)
Supplement: supplementary_material [file 290_云南白药:2024年半年度报告(英文版).xlsx]

## Sheet: Sheet
Nature of payment	Book balance at the end of the reporting period	Book balance at the beginning of the reporting period
Amounts from related parties within the scope of consolidation	6,245,637,078.87	4,254,011,881.88
Deposits and guarantees	9,326,051.55	14,347,777.84
Petty cash	14,831,329.01	7,104,113.05
Total	6,269,794,459.43	4,275,463,772.77
