# Supplementary material
Source: ML conference proceedings conference paper supplement (https://openreview.net/forum?id=xg0fmtqh8d)
Supplement: supplementary_material [file 291_鞍钢股份:2024中期报告.xlsx]

## Sheet: Sheet
項目	本期數	上期數	計入當期非經常性損益的金額
環保類政府補助	3	5	3
科研類政府補助	1	3	1
其他類政府補助	7	6	7
其他	54	3
合計	65	17	11
