# Supplementary material
Source: ML conference proceedings conference paper supplement (https://openreview.net/forum?id=xg0fmtqh8d)
Supplement: supplementary_material [file 292_青岛银行:2024年第一季度报告.xlsx]

## Sheet: Sheet
指標	2024年3月31日	2023年12月31日	2022年12月31日	2021年12月31日
資本充足率(%)(1)	13.46	12.79	13.56	15.83
一級資本充足率(%)(1)	10.68	10.10	10.69	11.04
核心一級資本充足率(%)(1)	8.98	8.42	8.75	8.38
撥備覆蓋率(%)	232.35	225.96	219.77	197.42
貸款撥備率(%)	2.73	2.67	2.65	2.64
正常類貸款遷徙率(%)(2)	0.31	1.00	1.01	1.07
關注類貸款遷徙率(%)(2)	34.38	40.19	43.54	78.54
次級類貸款遷徙率(%)(2)	11.52	32.47	22.43	19.28
可疑類貸款遷徙率(%)(2)	21.79	23.54	3.19	2.45
平均總資產回報率(%)（年化）(3)	0.73	0.65	0.60	0.61
成本佔收入比率（%）(4)	25.69	34.93	34.95	33.90
淨利差(%)（年化）(5)	1.83	1.85	1.85	1.87
淨利息收益率(%)（年化）(5)	1.77	1.83	1.76	1.79
