# Supplementary material
Source: ML conference proceedings conference paper supplement (https://openreview.net/forum?id=xg0fmtqh8d)
Supplement: supplementary_material [file 293_安道麦B:2024年第一季度报告(英文版).xlsx]

## Sheet: Sheet
Item	March 31, 2024	December 31, 2023	Item	March 31, 2024	December 31, 2023
Current assets:			Current liabilities:
Cash at bank and on hand	3,710,053	4,881,328	Short-term loans	5,299,947	5,733,522
Financial assets held for trading	1,873	1,912	Derivative financial liabilities	325,092	607,787
Derivative financial assets	128,562	850,137	Bills payable	516,770	613,507
Bills receivable	63,500	86,303	Accounts payable	4,833,578	4,649,733
Accounts receivable	9,088,939	8,146,677	Contract liabilities	1,314,153	1,514,365
Receivables financing	117,203	123,050	Employee benefits payable	857,844	847,039
Prepayments	309,572	305,883	Taxes payable	561,490	407,230
Other receivables	1,635,491	1,054,302	Other payables	1,521,335	1,469,319
Inventories	12,823,850	13,088,757	Non-current liabilities due within one year	2,068,629	2,297,888
Other current assets	1,076,415	1,083,714	Other current liabilities	731,913	753,827
Total current assets	28,955,458	29,622,063	T otal current liabilities	18,030,751	18,894,217
Non-current assets:			Non-current liabilities:
Long-term receivables	63,039	68,752	Long-term loans	3,374,215	2,885,939
Long-term equity investments	32,133	31,474	Debentures payable	6,848,469	6,919,423
Other equity investments	132,245	132,018	Lease liabilities	473,192	495,459
Investment properties	21,736	22,145	Long-term accounts payable	96,471	97,840
Fixed assets	9,850,569	10,040,113	Long-term employee benefits payables	686,613	671,530
Construction in progress	2,682,814	2,507,328	Provisions	298,188	299,251
Right-of-use assets	606,940	625,235	Deferred tax liabilities	293,727	297,103
Intangible assets	5,256,827	5,318,281	Other non-current liabilities	2,938,290	2,920,566
Goodwill	5,009,990	5,001,538	T otal non-current liabilities	15,009,165	14,587,111
Deferred tax assets	1,585,389	1,601,641	T otal liabilities	33,039,916	33,481,328
Other non-current assets	505,597	435,215	S hareholders’ equity:
Total non-current assets	25,747,279	25,783,740	Share capital	2,329,812	2,329,812
Total assets	54,702,737	55,405,803	Capital reserves	12,950,464	12,950,464
			Other comprehensive income	1,647,909	1,675,896
			Special reserves	10,533	16,595
			Surplus reserves	273,617	273,617
			Retained earnings	4,450,486	4,678,091
			Total equity attributed to the shareholders of the company	21,662,821	21,924,475
			Non-controlling interests	-	-
			Total equity	21,662,821	21,924,475
			Total liabilities and equity	54,702,737	55,405,803
