# Supplementary material
Source: ML conference proceedings conference paper supplement (https://openreview.net/forum?id=xg0fmtqh8d)
Supplement: supplementary_material [file 294_招商银行:2024年中期报告.xlsx]

## Sheet: Sheet
	2024年6月30日	2023年6月30日
現金及存放中央銀行款項	77,773	47,681
存放同業和其他金融機構款項	116,579	99,755
拆出資金	118,538	109,474
買入返售金融資產	307,022	278,573
金融投資及票據貼現	115,994	49,564
合計	735,906	585,047
