# Supplementary material
Source: ML conference proceedings conference paper supplement (https://openreview.net/forum?id=xg0fmtqh8d)
Supplement: supplementary_material [file 295_郑州银行:二零二四年第一季度报告.xlsx]

## Sheet: Sheet
監管指標	監管標準	2024年3月31日	2023年12月31日	2022年12月31日	2021年12月31日
核心一級資本充足率(%)(1)	≥7.5	8.54	8.90	9.29	9.49
一級資本充足率(%)(1)	≥8.5	10.58	11.13	11.63	13.76
資本充足率(%)(1)	≥10.5	11.85	12.38	12.72	15.00
槓桿率(%)(1)	≥4	7.52	7.60	7.69	8.72
流動性比例(%)(2)	≥25	68.08	59.10	72.34	63.72
流動性覆蓋率(%)(2)	≥100	182.53	265.83	300.13	339.61
不良貸款率(%)(3)	≤5	1.87	1.87	1.88	1.85
撥備覆蓋率(%)(3)	≥150	193.44	174.87	165.73	156.58
貸款撥備率(%)(3)	≥2.5	3.62	3.28	3.12	2.90
總資產收益率(%)(年化)		0.63	0.30	0.45	0.61
成本收入比(%)(4)		18.22	27.05	22.98	23.06
