# Supplementary material
Source: ML conference proceedings conference paper supplement (https://openreview.net/forum?id=xg0fmtqh8d)
Supplement: supplementary_material [file 297_兖煤澳大利亚:季度报告截至2023年6月30日止季度.xlsx]

## Sheet: Sheet
	單位	2022年第三季度	2022年第四季度	2023年第一季度	2023年第二季度	2023年第三季度	2023年第四季度	2024年第一季度	2024年第二季度
API5,5,500千卡	美元╱噸	195	141	125	102	88	96	93	89
GCNewc,6,000千卡	美元╱噸	421	381	242	158	149	136	126	136
低揮發分噴吹煤(澳大利亞離岸 價)	美元╱噸	246	273	311	207	169	185	164	164
半軟焦煤(澳大利亞離岸價)	美元╱噸	200	234	266	181	167	161	150	152
澳元兌美元		0.68	0.66	0.68	0.67	0.65	0.65	0.66	0.66
API5,5,500千卡	澳元╱噸	286	215	183	153	135	148	142	134
GCNewc,6,000千卡	澳元╱噸	616	579	354	237	228	208	191	206
低揮發分噴吹煤(澳大利亞離岸 價)	澳元╱噸	360	415	456	310	258	285	249	248
半軟焦煤(澳大利亞離岸價)	澳元╱噸	294	356	389	271	255	247	228	231
動力煤銷售價格	澳元╱噸	489	430	338	197	178	180	159	163
冶金煤銷售價格	澳元╱噸	434	389	383	403	360	292	334	318
整體銷售價格	澳元╱噸 ╱	481	422	347	226	197	196	180	181
