# Supplementary material
Source: ML conference proceedings conference paper supplement (https://openreview.net/forum?id=xg0fmtqh8d)
Supplement: supplementary_material [file 298_古井贡B:2024年半年度报告(英文版).xlsx]

## Sheet: Sheet
Items	Houses and buildings	Land use rights	Total
I. Original carrying value
1. Beginning balance	84,177,952.61	2,644,592.00	86,822,544.61
2. Increase during the Reporting Period
(1) Transfer from fixed assets
3. Decrease during the Reporting Period
4. Ending balance	84,177,952.61	2,644,592.00	86,822,544.61
II. Accumulated depreciation and amortization:
1. Beginning balance	39,275,828.32	923,806.10	40,199,634.42
2. Increase during the Reporting Period	1,963,609.58	31,369.60	1,994,979.18
(1) Withdrawal or amortization	1,963,609.58	31,369.60	1,994,979.18
(2) Transfer from fixed assets
3. Decrease during the Reporting Period
4. Ending balance	41,239,437.90	955,175.70	42,194,613.60
III. Impairment provision
1. Beginning balance
2. Increase during the Reporting Period
3. Decrease during the Reporting Period
4. Ending balance
IV. Carrying value
1. Ending carrying value	42,938,514.71	1,689,416.30	44,627,931.01
2. Beginning carrying value	44,902,124.29	1,720,785.90	46,622,910.19
