# Supplementary material
Source: ML conference proceedings conference paper supplement (https://openreview.net/forum?id=xg0fmtqh8d)
Supplement: supplementary_material [file 299_深中华B:2024年半年度报告(英文版).xlsx]

## Sheet: Sheet
Category	Amortization method	Service life (year)	Determination basis	Residual rate (%)
Land use right	Straight-line method	40-50 years	Statutory term/registration term of land use certificate	0.00
Trademark right	Straight-line method	10 years	Statutory term	0.00
Software	Straight-line method	2-10 years	Benefit period/contract period	0.00
Patent	Straight-line method	5-10 years	Benefit period/contract period	0.00
Non-patent technology	Straight-line method	5-10 years	Benefit period/contract period	0.00
Industrial property rights and proprietary technology	Straight-line method	10 years	Benefit period/contract period	0.00
Others	Straight-line method	5-10 years	Benefit period/contract period	0.00
