# Supplementary material
Source: ML conference proceedings conference paper supplement (https://openreview.net/forum?id=xg0fmtqh8d)
Supplement: supplementary_material [file 300_深南电B:2024年半年度报告(英文版).xlsx]

## Sheet: Sheet
Item	Ending balance			Ending balance of previous year
	Book balance	Provision for impairment	Book value	Book balance	Provision for impairment	Book value
Oil to gas project	9,441,286.39	9,441,286.39		9,441,286.39	9,441,286.39
Technical transformation project	4,060,504.04	1,605,000.00	2,455,504.04	4,080,877.62	1,605,000.00	2,475,877.62
Others	32,547.17		32,547.17	972,977.48		972,977.48
Total	13,534,337.60	11,046,286.39	2,488,051.21	14,495,141.49	11,046,286.39	3,448,855.10
