# Supplementary material
Source: ML conference proceedings conference paper supplement (https://openreview.net/forum?id=xg0fmtqh8d)
Supplement: supplementary_material [file 301_TCL科技:2024年半年度报告(英文版).xlsx]

## Sheet: Sheet
	Change of accounting policies	Share of other comprehensive investees that will be reclassified to profit or loss under equity method	Gain/loss on changes in fair value of financial assets	Gain/(Loss) changes in cash flow hedges	Differences arising from translation of foreign currency-denominated financial statements	Fair value changes of other equity instruments	Fair value changes of other debt instruments	Other comprehensive income transferred to retained earnings	Subtotal	Non-controlling interests	Total other comprehensive income
January 1,20231	334,950	29,387	(350,569)	78,161	(636,710)	(157,710)	-	(109,331)	(811,822)	76,240	(735,582)
Movement of 2023	-	(4,422)	-	(49,418)	(24,180)	(58,699)	-	2,743	(133,976)	(55,244)	(189,220)
January 1,2024	334,950	24,965	(350,569)	28,743	(660,890)	(216,409)	-	(106,588)	(945,798)	20,996	(924,802)
Movement from January to June 2024	-	143,396	-	(9,792)	44,474	119	-	-	178,197	(3,201)	174,996
June 30,2024	334,950	168,361	(350,569)	18,951	(616,416)	(216,290)	-	(106,588)	(767,601)	17,795	(749,806)
