# Supplementary material
Source: ML conference proceedings conference paper supplement (https://openreview.net/forum?id=xg0fmtqh8d)
Supplement: supplementary_material [file 302_网易-S:2024年6月30日止第二季度未经审计的财务业绩公告、第二季度股息公告及中期报告.xlsx]

## Sheet: Sheet
	根據美國公認會計準則所呈報的金額	按公允價值計量的投資(注釋(a))	可贖回少數股東權益(注釋(b))	根據國際財務報告準則所呈報的金額
其他長期資產	28,471,568	(15,673,947)	-	12,797,621
按公允價值計量且其變動計入損益的金融資產	-	18,369,496	-	18,369,496
資產總額	185,924,978	2,695,549	-	188,620,527
按公允價值計量且其變動計入損益的金融負債	-	-	37,961	37,961
遞延所得稅負債	2,299,303	29,886	-	2,329,189
負債總額	57,840,897	29,886	37,961	57,908,744
可贖回少數股東權益	115,759	-	(115,759)	-
權益總額	127,968,322	2,665,663	77,798	130,711,783
負債、可贖回少數股東權益及股東權益總額	185,924,978	2,695,549	-	188,620,527
