# Supplementary material
Source: ML conference proceedings conference paper supplement (https://openreview.net/forum?id=xg0fmtqh8d)
Supplement: supplementary_material [file 303_三巽集团:2024中期报告.xlsx]

## Sheet: Sheet
			For the six months ended 30 June截至6月30日止六個月
			2024	2023
		Notes附註	2024年RMB’000人民幣千元(Unaudited)(未經審核)	2023年RMB’000人民幣千元(Unaudited)(未經審核)
CASH FLOWS FROM OPERATING ACTIVITIES	經營活動所得現金流量
Profit/(loss) before tax	除稅前溢利╱（虧損）		(50,714)	(12,405)
Adjustments for:	就下列項目作出調整：
Depreciation of items of property, plant and equipment	物業、廠房及設備項目折舊	6	404	1,321
Depreciation of right-of-use assets	使用權資產折舊	6,13(c)	–	503
Finance costs	融資成本	7	39,542	18,229
Gain on disposal of a subsidiary	出售一間附屬公司之收益		–	(412)
Share of losses of associates	分佔聯營公司虧損		(4,880)	418
Impairment losses recognised for properties under development and completed properties for sales	就發展中物業及已竣工待售物業確認的減值虧損	6	–	313,930
Changes in fair value of investment properties	投資物業公平值變動		–	5,200
Interest income	利息收入	5	(334)	(1,433)
			(15,982)	325,351
Decrease in properties under development and completed properties held for sale	發展中物業及持作出售已竣工物業減少		649,798	1,157,734
Decrease in restricted cash	受限制現金減少 110,320 154,240		110,320	154,240
Decrease in pledged deposits	已抵押存款減少		11,527	48,755
Decrease/(increase) in trade receivables	貿易應收款項減少╱（增加） (387) (161)		(387)	(161)
Decrease in prepayments, deposits and other receivables	預付款項、按金及其他應收款項減少		40,294	122,378
(Increase)/decrease in contract cost assets	合約成本資產（增加）╱減少		(3,361)	1,453
Decrease in trade and bills payables	應付貿易款項及應付票據減少		(109,732)	(108,433)
Increase in other payables and accruals	其他應付款項及應計費用增加		(40,957)	135,284
Decrease in contract liabilities	合約負債減少		(1,032,718)	(1,541,851)
(Decrease)/increase in amounts due to related parties	應付關聯方款項（減少）╱增加		15,250	17,755
Cash generated from operations	經營所得現金		65,892	312,505
Interest received	已收利息	5	334	1,433
Interest paid	已付利息		(14,259)	(60,232)
Tax paid	已繳稅項		(17,519)	(58,340)
Net cash flows from operating activities	經營活動所得現金流量淨額		34,447	195,366
CASH FLOWS FROM INVESTING ACTIVITIES	投資活動所得現金流量
Disposal of a subsidiary	出售一間附屬公司		–	(1,743)
Purchases of items of property, plant and equipment	購買物業、廠房及設備項目	11	–	(147)
Advances to a related company	向一間關聯公司墊款	24	(6,133)	(44,463)
Recover of advance to associates	聯營公司償還墊款	24	6,855	–
Net cash flows used in investing activities	投資活動所用現金流量淨額		722	(46,353)
CASH FLOWS FROM FINANCING ACTIVITIES	融資活動所得現金流量
Advances from an associate	聯營公司墊款	24	1,724	4,335
Repayments to non-controlling shareholders of subsidiaries	償還附屬公司非控股股東款項		(47,795)	(57,615)
Principal portion of lease payments	租賃付款的本金部分		–	(474)
Proceeds from interest-bearing bank and other borrowings	計息銀行及其他借款所得款項		–	41,900
Repayment of interest-bearing bank and other borrowings	償還計息銀行及其他借款		(9,794)	(147,440)
Net cash flows used in financing activities	融資活動所用現金流量淨額		(55,865)	(159,294)
NET DECREASE IN CASH AND CASH EQUIVALENTS	現金及現金等價物減少淨額		(20,696)	(10,281)
Cash and cash equivalents at beginning of period	期初現金及現金等價物		46,707	133,333
Cash and cash equivalents at end of period	期末現金及現金等價物		26,011	123,052
Analysis of balances of cash and cash equivalents	現金及現金等價物結餘分析
Cash and bank balances	現金及銀行結餘	17	248,897	731,190
Less: Restricted cash	減：受限制現金	17	153,544	502,753
Pledged deposits	已抵押存款	17	69,341	105,385
CASH AND CASH EQUIVALENTS AS STATED IN THE INTERIM CONDENSED CONSOLIDATED STATEMENT OF CASH FLOWS	中期簡明綜合現金流量表所列現金及現金等價物		26,011	123,052
