# Supplementary material
Source: ML conference proceedings conference paper supplement (https://openreview.net/forum?id=xg0fmtqh8d)
Supplement: supplementary_material [file 304_恒鼎实业:二零二四年中期报告.xlsx]

## Sheet: Sheet
	截至六月三十日止六個月
	二零二四年人民幣千元(未經審核)	二零二三年人民幣千元(未經審核)
焦煤及其副產品銷售:
精煤	829,470	1,302,084
高灰動力煤	94,888	127,059
其他產品	2,044	1,309
客戶合同收入	926,402	1,430,452
