# Supplementary material
Source: ML conference proceedings conference paper supplement (https://openreview.net/forum?id=xg0fmtqh8d)
Supplement: supplementary_material [file 305_春立医疗:中期报告2024.xlsx]

## Sheet: Sheet
項目	附註	本期發生額	上期發生額
一、營業收入	十七（四）	384,123,956.15	537,169,928.44
減：營業成本	十七（四）	125,298,194.44	168,314,166.18
稅金及附加		4,146,097.81	3,876,957.93
銷售費用		107,376,952.16	163,825,278.23
管理費用		19,627,445.62	17,961,951.91
研發費用		64,050,604.62	7.16925e+07
財務費用		–8,998,189.70	–4,962,981.70
其中：利息費用		25,108.95	39,312.28
利息收入		8,015,177.01	4,422,085.94
加：其他收益		5,539,322.83	3,473,012.34
投資收益(損失以「–」號填列)	十七（五）	6,084,909.58	10,067,133.70
其中：對聯營企業和合營企業的投資收益
以攤餘成本計量的金融資產終止確認收益
淨敞口套期收益(損失以「–」號填列)
公允價值變動收益(損失以「–」號填列)		4,670,205.47	4,365,191.78
信用減值損失(損失以「–」號填列)		–2,953,989.34	–7,308,140.31
資產減值損失(損失以「–」號填列)		–5,229,285.17	–3,175,940.28
資產處置收益(損失以「–」號填列)		39,213.61
二、營業利潤（虧損以「–」號填列）		80,773,228.18	123,883,298.30
加：營業外收入		855,456.83	286,636.36
減：營業外支出		72,914.25	209,000.00
三、利潤總額（虧損總額以「–」號填列）		81,555,770.76	123,960,934.66
減:所得稅費用		3,132,973.20	10,233,825.22
四、淨利潤(淨虧損以「–」號填列)		78,422,797.56	113,727,109.44
（一）持續經營淨利潤（淨虧損以「–」號填列）		78,422,797.56	113,727,109.44
（二）終止經營淨利潤（淨虧損以「–」號填列）
五、其他綜合收益的稅後淨額
（一）不能重分類進損益的其他綜合收益
（二）將重分類進損益的其他綜合收益
六、 綜合收益總額		78,422,797.56	113,727,109.44
