# Supplementary material
Source: ML conference proceedings conference paper supplement (https://openreview.net/forum?id=xg0fmtqh8d)
Supplement: supplementary_material [file 306_绿色动力环保:2024中期报告.xlsx]

## Sheet: Sheet
項目	附註	2024年1-6月 (未經審計)	2023年1-6月 (未經審計)
一、 營業收入	十三(5)	31,304,884.78	106,562,502.55
減：營業成本	十三(5)	(4,180,184.29)	(4,351,456.79)
稅金及附加		(256,431.45)	(622,923.08)
管理費用		(20,866,921.38)	(19,210,663.86)
研發費用		(2,469,797.57)	(2,522,176.32)
財務費用		(85,285,640.23)	(80,018,339.87)
其中：利息費用		(86,961,846.66)	(86,331,490.10)
利息收入		2,887,479.96	6,411,348.00
加：其他收益		253,031.96	1,215,676.28
投資收益	十三(6)	22,623,663.77	1,111,713,475.25
信用減值損失		(140,764.10)	(118,921.76)
資產處置收益		–	1,156.06
二、營業(虧損)╱利潤		(59,018,158.51)	1,112,648,328.46
三、(虧損)╱利潤總額		(59,018,158.51)	1,112,648,328.46
減:所得稅收益╱(費用)		140.02	(999,608.39)
四、淨（虧損）╱利潤		(59,018,018.49)	1,111,648,720.07
按經營持續性分類
持續經營淨（虧損）╱利潤		(59,018,018.49)	1,111,648,720.07
終止經營淨利潤		–	–
五、其他綜合收益的稅後淨額		–	–
六、綜合收益總額		(59,018,018.49)	1,111,648,720.07
