# Supplementary material
Source: ML conference proceedings conference paper supplement (https://openreview.net/forum?id=xg0fmtqh8d)
Supplement: supplementary_material [file 307_京东方B:2024年一季度报告(英文版).xlsx]

## Sheet: Sheet
Item	Q1 2024	Q1 2023
1. Cash flows from operating activities:
Proceeds from sale of commodities and rendering of services	52,321,850,824.00	42,514,868,173.00
Net increase in customer deposits and deposits from other banks and financial institutions	0.00	0.00
Net increase in borrowings from the central bank	0.00	0.00
Net increase in loans from other financial institutions	0.00	0.00
Premiums received on original insurance contracts	0.00	0.00
Net proceeds from reinsurance	0.00	0.00
Net increase in deposits and investments of policy holders	0.00	0.00
Interest, fees and commissions received	0.00	0.00
Net increase in loans from other banks and financial institutions	0.00	0.00
Net increase in proceeds from repurchase transactions	0.00	0.00
Net proceeds from acting trading of securities	0.00	0.00
Tax and levy rebates	2,518,507,872.00	2,313,084,732.00
Cash generated from other operating activities	1,320,664,784.00	2,757,111,561.00
Subtotal of cash generated from operating activities	56,161,023,480.00	47,585,064,466.00
Payments for commodities and services	31,470,733,300.00	30,398,741,266.00
Net increase in loans and advances to customers	0.00	0.00
Net increase in deposits in the central bank and other banks and financial institutions	0.00	0.00
Payments for claims on original insurance contracts	0.00	0.00
Net increase in loans to other banks and financial institutions	0.00	0.00
Interest, fees and commissions paid	0.00	0.00
Policy dividends paid	0.00	0.00
Cash paid to and for employees	5,417,226,891.00	5,009,341,362.00
Taxes and levies paid	1,333,136,024.00	816,646,900.00
Cash used in other operating activities	1,709,222,195.00	1,237,908,870.00
Subtotal of cash used in operating activities	39,930,318,410.00	37,462,638,398.00
Net cash generated from/used in operating activities	16,230,705,070.00	10,122,426,068.00
2. Cash flows from investing activities:
Proceeds from disinvestment	8,551,543,161.00	23,831,855,131.00
Return on investment	109,848,899.00	149,214,617.00
Net proceeds from the disposal of fixed assets, intangible assets and other long-lived assets	6,919,339.00	8,453,288.00
Net proceeds from the disposal of subsidiaries and other business units	0.00	0.00
Cash generated from other investing activities	730,329,518.00	1,810,581,640.00
Subtotal of cash generated from investing activities	9,398,640,917.00	25,800,104,676.00
Payments for the acquisition of fixed assets, intangible assets and other long-lived assets	4,990,971,613.00	4,162,151,317.00
Payments for investments	13,799,650,053.00	22,250,323,389.00
Net increase in pledged loans granted	0.00	0.00
Net payments for the acquisition of subsidiaries and other business units	0.00	0.00
Cash used in other investing activities	10,663,235.00	8,643,927.00
Subtotal of cash used in investing activities	18,801,284,901.00	26,421,118,633.00
Net cash generated from/used in investing activities	-9,402,643,984.00	-621,013,957.00
3. Cash flows from financing activities:
Capital contributions received	333,442,000.00	140,300,202.00
Including: Capital contributions by non-controlling interests to subsidiaries	333,442,000.00	140,300,202.00
Borrowings received	11,049,663,476.00	10,054,932,380.00
Cash generated from other financing activities	3,391,076.00	1,528,590.00
Subtotal of cash generated from financing activities	11,386,496,552.00	10,196,761,172.00
Repayment of borrowings	13,103,045,886.00	12,032,755,699.00
Interest and dividends paid	1,747,105,196.00	2,096,011,812.00
Including: Dividends paid by subsidiaries to non-controlling interests	0.00	0.00
Cash used in other financing activities	190,458,308.00	6,925,098,464.00
Subtotal of cash used in financing activities	15,040,609,390.00	21,053,865,975.00
Net cash generated from/used in financing activities	-3,654,112,838.00	-10,857,104,803.00
4. Effect of foreign exchange rates changes on cash and cash equivalents	87,086,878.00	-224,798,117.00
5. Net increase in cash and cash equivalents	3,261,035,126.00	-1,580,490,809.00
Add: Cash and cash equivalents, beginning of the period	52,092,981,748.00	64,382,037,764.00
6. Cash and cash equivalents, end of the period	55,354,016,874.00	62,801,546,955.00
