# Supplementary material
Source: ML conference proceedings conference paper supplement (https://openreview.net/forum?id=xg0fmtqh8d)
Supplement: supplementary_material [file 309_泸州老窖:2024年半年度报告(英文版).xlsx]

## Sheet: Sheet
Item	Related party	Closing Balance		Opening Balance
		Book value	Provision for bad debt	Book value	Provision for bad debt
Prepayment	Sichuan Meihe Winery Industry Co.,Ltd.	2,961,479.50		2,961,479.50
Prepayment	CTS Luzhou Laojiao Cultural Tourism Development Co., Ltd.	128,736.00		518,886.00
Prepayment	Luzhou XingLu Water (Group) Co., Ltd.	808,408.73		705,446.15
Prepayment	Luzhou Laojiao Group Co., Ltd.	4,087,461.73		3,522,751.07
Prepayment	Luzhou Public Transport Group Co., Ltd.			126,001.64
Other receivables	CTS Luzhou Laojiao Cultural Tourism Development Co., Ltd.	90,204.10	4,510.21
Other receivables	Luzhou Laojiao Innovation Industry Holdings Co., Ltd.	267,996.88	13,399.84
