# Supplementary material
Source: ML conference proceedings conference paper supplement (https://openreview.net/forum?id=xg0fmtqh8d)
Supplement: supplementary_material [file 310_深南电B:2024年半年度报告(英文版).xlsx]

## Sheet: Sheet
Item	Ending balance of previous year	Increased amount in the current period	Decreased amount in the current period	Ending balance
Statutory surplus reserve	310,158,957.87			310,158,957.87
Discretionary surplus reserve	22,749,439.73			22,749,439.73
Total	332,908,397.60			332,908,397.60
