# Supplementary material
Source: ML conference proceedings conference paper supplement (https://openreview.net/forum?id=xg0fmtqh8d)
Supplement: supplementary_material [file 311_美的集团:2024年半年度报告(英文版).xlsx]

## Sheet: Sheet
Item	Current period	Same period of prior year
Aggregated carrying amount of investments	4,840,550	4,731,210
Aggregate of the following items in proportion
Net profit (i) Other	431,939	348,545
comprehensive income (i)	12,565	36,188
Total comprehensive income	444,504	384,733
