# Supplementary material
Source: ML conference proceedings conference paper supplement (https://openreview.net/forum?id=xg0fmtqh8d)
Supplement: supplementary_material [file 312_鞍钢股份:2024中期报告.xlsx]

## Sheet: Sheet
類別	2023年12月31日
	賬面餘額		壞賬準備
	金額	比例(%)	金額	計提比例 (%)	賬面價值
按單項計提壞賬準備的應收賬款	661	28.00	534	80.79	127
按組合計提壞賬準備的應收賬款	1,700	72.00	6	0.35	1,694
其中：無風險組合	1,563	66.20			1,563
賬齡風險矩陣組合	137	5.80	6	4.38	131
合計	2,361	100.00	540	22.87	1,821
