# Supplementary material
Source: ML conference proceedings conference paper supplement (https://openreview.net/forum?id=xg0fmtqh8d)
Supplement: supplementary_material [file 313_鞍钢股份:2024中期报告.xlsx]

## Sheet: Sheet
項目	本期數	上期數
1. 將淨利潤調節為經營活動現金流量：
淨利潤	(2,673)	(1,328)
加：資產減值准備	205	(26)
信用減值損失	3	(21)
固定資產折舊	1,802	1,670
使用權資產折舊	31	82
無形資產攤銷	203	122
處置固定資產、無形資產和其他長期資產的損失（收益以「-」號填列）	(35)	(25)
固定資產報廢損失（收益以「-」號填列）	79	22
公允價值變動損失（收益以「-」號填列）	(34)	(53)
財務費用（收益以「-」號填列）	102	121
投資損失（收益以「-」號填列）	(253)	(109)
遞延所得稅資產減少（增加以「-」號填列）	(32)	(594)
遞延所得稅負債增加（減少以「-」號填列）	49	9
存貨的減少（增加以「-」號填列）	1,928	(641)
經營性應收項目的減少（增加以「-」號填列）	(1,726)	281
經營性應付項目的增加（減少以「-」號填列）	926	2,952
其他	(3)	53
經營活動產生的現金流量淨額	572	2,515
2. 現金及現金等價物淨變動情況:
現金的期末餘額	3,055	3,962
減：現金的期初餘額	3,319	5,234
加：現金等價物的期末餘額
減:現金等價物的期初餘額
現金及現金等價物淨增加額	(264)	(1,272)
