# Supplementary material
Source: ML conference proceedings conference paper supplement (https://openreview.net/forum?id=xg0fmtqh8d)
Supplement: supplementary_material [file 314_京粮B:2024年半年度报告(英文版).xlsx]

## Sheet: Sheet
Items	Amount for the current period	Amount for the prior period
I. Total operating income	2,047,313.31	11,839,311.03
Less：Operating cost	170,581.26	170,581.26
Tax and surcharg	204,491.36	174,413.63
Selling expense
Administration expenses	3,150,269.36	3,410,680.07
Research and developmen
Financial expens	-9,722,064.50	-5,278,290.51
Including: Interest expense	4,545,000.00
Interest income	14,379,702.55	5,280,177.21
Add: Other incom	619,000.43	2,308.28
Income from investment (Losses shall be filled in with “-”)	28,021,459.50	150,814.85
Including: income from investment on joint venture and cooperative enterprise
Income from derecognition of financial assets measure at amortized cost
Income from net exposure hedging(Losses shall be filled in with “-”)
Income from changes in fair value (Losses shall be filled in with “-”)
Credit impairment loss(Losses shall be filled in with “-”)
Income from assets impairment(Losses shall be filled in with “-”)
Income from asset disposal (Losses shall be filled in with “-”)
III. Operating profit (Losses shall be filled in with “-”)	36,884,495.76	13,515,049.71
Add: non-operating income	1,082,795.47
Less: non-operating expenditure	63,737.22	5,027.46
IV. Total profit (Total losses shall be filled in with “-”)	37,903,554.01	13,510,022.25
Less: income tax expense
V. Net profit (Net loss shall be filled in with “-”)	37,903,554.01	13,510,022.25
1. Net profit from continuing operations (Net loss shall be filled in with “-”)	37,903,554.01	13,510,022.25
2. Net profit from discontinuing operations (Net loss shall be filled in with “-”)
V. Net of tax from other comprehensive income
1.Other comprehensive income that cannot be reclassified into the profit and loss
（1）Remeasure changes in defined benefit plans
（2）Other comprehensive income that cannot be transferred to gains and losses under the equity method
（3）Changes in fair value of other equity instrument investments
（4）Changes in the fair value of the company's own credit risk
（5）Others
2 .Other comprehensive income that will be reclassified into the profit and loss
（1）Other comprehensive income that can be transferred to gains and losses under the equity method
（2）Changes in fair value of other debt investments
（3）Reclassification of financial assets included in other comprehensive income
（4）Provision for credit impairment of other debt investments
（5）Cash flow hedge reserve
（6）Balance arising from the translation of foreign currency
（7）Others
VII. Total comprehensive income	37,903,554.01	13,510,022.25
VIII. Earnings per share:
(I) Basic earnings per share
(II) Diluted earnings per share
