# Supplementary material
Source: ML conference proceedings conference paper supplement (https://openreview.net/forum?id=xg0fmtqh8d)
Supplement: supplementary_material [file 315_600482-中国动力-中国船舶重工集团动力股份有限公司2024年半年度报告_2024-08-31.xlsx]

## Sheet: Sheet
主要污染物及特征污染物名称		排放方式	排放口数量	分布情况	排放浓度和总量	超标情况	污染物排放标准	核定的排放总量
废气	铅烟尘	有组织排放	28	22	浓度:0.058mg/m³总量:0.018t	无	0.5mg/m³	0.215t/a
	硫酸雾			4	浓度:低于检出限	无	5mg/m³	/
	氮氧化物			2	浓度:23mg/m³总量:0.196t	无	50mg/m³	1.935t/a
废水	铅	间断排放	1	厂区排口入徐水区污水处理厂	浓度：0.045mg/L总量:0.00037t	无	0.5mg/L	0.017t/a
	COD				浓度：10.81mg/L总量：0.088t	无	150mg/L	2t/a
	氨氮				浓度：0.88mg/L总量：0.0094t	无	30mg/L	0.083t/a
