# Supplementary material
Source: ML conference proceedings conference paper supplement (https://openreview.net/forum?id=xg0fmtqh8d)
Supplement: supplementary_material [file 316_上海电气:2024年中期报告.xlsx]

## Sheet: Sheet
		未經審核&#10;截至六月三十日止六個月
	附註	二零二四年&#10;人民幣千元	二零二三年&#10;人民幣千元
一、營業總收入		49,868,517	53,077,946
其中：營業收入	8	49,554,334	52,859,907
利息收入	8	313,744	216,299
手續費及傭金收入	8	439	1,740
二、營業總成本		(47,840,034)	(51,631,988)
其中：營業成本	8	(40,225,850)	(43,849,544)
利息支出	8	(50,131)	(41,038)
手續費及傭金支出	8	(474)	(404)
稅金及附加	9	(290,171)	(317,148)
銷售費用		(1,361,893)	(1,425,781)
管理費用		(3,381,790)	(3,380,478)
研發費用		(2,327,462)	(2,327,078)
財務費用 - 淨額		(202,263)	(290,517)
其中：利息費用		(858,020)	(750,217)
利息收入		640,731	334,891
加：其他收益		501,009	441,291
投資收益		939,870	1,159,942
其中：對聯營企業和合營企業的投資收益		531,994	503,197
匯兌收益		4,533	10,223
公允價值變動(損失)/收益		(319,889)	355,644
信用減值損失		(394,088)	(948,647)
資產減值損失		(407,058)	(629,260)
資產處置收益		4,897	22,401
三、營業利潤		2,357,757	1,857,552
加：營業外收入		69,594	53,969
減：營業外支出		(24,180)	(89,248)
四、利潤總額		2,403,171	1,822,273
減:所得稅費用	10	(581,584)	(335,934)
五、淨利潤		1,821,587	1,486,339
歸屬於母公司股東的淨利潤		601,744	590,363
少數股東損益		1,219,843	895,976
六、其他綜合收益的稅後淨額		(5,719)	159,010
歸屬於母公司股東的其他綜合收益的稅後淨額		(6,928)	141,985
以後將重分類計入損益的其他綜合收益		(6,928)	141,985
其他債權投資公允價值變動		4,295	100,213
應收款項融資信用減值準備		(851)	(11,029)
現金流量套期損益的有效部份		(317)	(1,741)
外幣財務報表折算差額		(10,055)	54,542
歸屬於少數股東的其他綜合收益的稅後淨額		1,209	17,025
七、綜合收益總額		1,815,868	1,645,349
歸屬於母公司股東的綜合收益總額		594,816	732,348
歸屬於少數股東的綜合收益總額		1,221,052	913,001
八、每股收益
基本每股收益(人民幣元/股)	11	0.039元	0.038元
稀釋每股收益(人民幣元/股)	11	0.039元	0.038元
