# Supplementary material
Source: ML conference proceedings conference paper supplement (https://openreview.net/forum?id=xg0fmtqh8d)
Supplement: supplementary_material [file 317_招港B:2024年半年度报告(英文版).xlsx]

## Sheet: Sheet
Item	Current period	Prior period
Payment for the Company's acquisition of minority interests of CM Port	147,607,116.30	302,638,065.73
Lease expenses paid	142,264,009.77	168,480,367.22
Others	1,383,669.41	3,737,603.90
Total	291,254,795.48	474,856,036.85
