# Supplementary material
Source: ML conference proceedings conference paper supplement (https://openreview.net/forum?id=xg0fmtqh8d)
Supplement: supplementary_material [file 318_拓邦股份:2024年半年度报告(英文版).xlsx]

## Sheet: Sheet
Source for other revenues	Amount incurred in the current period	Amount incurred in prior period
Governmental subsidies	15,418,390.00	13,429,284.92
Return of individual income tax service charge	1,125,817.55	1,169,120.09
Tax reduction and exemption	404,450.00	196,389.92
VAT refund upon collection	1,910,980.21	2,399,764.36
Input tax plus tax reduction	2,555,337.33
Total	21,414,975.09	17,194,559.29
