# Supplementary material
Source: ML conference proceedings conference paper supplement (https://openreview.net/forum?id=xg0fmtqh8d)
Supplement: supplementary_material [file 319_东山精密:2024年一季度报告(英文版).xlsx]

## Sheet: Sheet
	2024 Jan-Mar	2023 Jan-Mar	Change
Operating revenue (RMB)	7,744,804,604.28	6,511,602,610.15	18.94%
Net profit attributable to shareholders of the Listed Company (RMB)	289,348,487.81	471,650,134.12	-38.65%
Net profit attributable to shareholders of the Listed Company after deduction of non-recurring gain or loss (RMB)	261,306,973.35	280,096,313.63	-6.71%
Net cash flow from operating activities (RMB)	1,557,837,879.15	1,799,383,005.75	-13.42%
Basic earnings per share (RMB/share)	0.17	0.28	-39.29%
Diluted earnings per share (RMB/share)	0.17	0.28	-39.29%
Weighted average return on net assets	1.57%	2.85%	-1.28%
	March 31, 2024	December 31, 2023	Change
Total assets (RMB)	45,562,508,510.25	44,371,719,028.28	2.68%
Owners’ equity attributable to shareholders of the Listed Company (RMB)	18,373,771,308.37	18,143,026,745.54	1.27%
