# Supplementary material
Source: ML conference proceedings conference paper supplement (https://openreview.net/forum?id=xg0fmtqh8d)
Supplement: supplementary_material [file 320_博实股份:2024年半年度报告摘要(英文版).xlsx]

## Sheet: Sheet
Committed investment project and super raise fund arrangement	Total of committed investment of raised capital	Total investment after modification (1)	Investment amount in the reporting period	Accumulative investment amount as of the period-end (2)	Investment schedule as the period-end (3)= (2)/(1)	Date of reaching intended use of the project
1. Robot and intelligent factory industrialization production project.	16,000.00	16,000.00	2,898.5	10,824.79	67.65%	September 30th,2024
2. Sub-merged arc furnace smelting robot and its intelligent factory R & D demonstration project.	9,000.00	9,000.00	339.53	6,490.00	72.11%	June 30th,2025
3.Project of technology innovation and service center (R&D center)	7,000.00	7,000.00	480.21	4,520.79	64.58%	November 30th,2023
4.Supplementary working capital	12,341.86	12,341.86	--	12,341.86	100.00%	Not applicable
Total	44,341.86	44,341.86	3,718.24	34,177.44	--	--
