# Supplementary material
Source: ML conference proceedings conference paper supplement (https://openreview.net/forum?id=xg0fmtqh8d)
Supplement: supplementary_material [file 321_600482-中国动力-中国船舶重工集团动力股份有限公司2024年半年度报告_2024-08-31.xlsx]

## Sheet: Sheet
主要污染物及特征污染物名称		排放方式	排放口数量	分布情况	排放浓度和总量	超标情况	污染物排放标准	核定的排放总量
废气	颗粒物	有组织排放	57	7	浓度：6mg/m³上半年总量：0.2934t/a	无	10mg/m³	——
	VOCs			2	浓度：9.21mg/m³上半年总量：0.34259t/a	无	60mg/m³	——
	氮氧化物			26	浓度：22mg/m³上半年总量：0.2701t/a	无	80mg/m³	——
	硫酸雾			2	浓度：0mg/m³上半年总量：0t/a	无	10mg/m³	——
	二氧化硫			26	浓度：2mg/m³上半年总量：0.1523t/a	无	50mg/m³	——
废水	PH	间断排放	1	废水经厂区工业废水处理站处理后作为中水达标回用，多余达标中水排入洛阳市涧西污水处理厂	实测值：7.4上半年总量：——	无	6-9	——
	COD				浓度：25mg/L上半年总量：0t（废水零排放）	无	80mg/L	——
	氨氮				浓度：1.79mg/L上半年总量：0t（废水零排放）	无	15mg/L	——
