# Supplementary material
Source: ML conference proceedings conference paper supplement (https://openreview.net/forum?id=xg0fmtqh8d)
Supplement: supplementary_material [file 322_600482-中国动力-中国船舶重工集团动力股份有限公司2024年半年度报告_2024-08-31.xlsx]

## Sheet: Sheet
主要污染物及特征污染物名称		排放方式	排放口数量	分布情况	排放浓度	超标情况	污染物排放标准	核定的排放总量
废气	苯	有组织排放	4	C区	0.614mg/m³0.03t/年	无	6mg/m³	/
	甲苯			C区	4.93mg/m³0.441t/年	无	40mg/m³	/
	二甲苯			C区	3.11mg/m³0.353t/年	无	70mg/m³	/
	非甲烷总烃			C区	2.17mg/m³1.535t/年	无	100mg/m³
	颗粒物	有组织排放	7	C区	4.7mg/m³0.99t/年	无	100mg/m³	/
	氮氧化物	有组织排放	5	A、C区	28mg/m³0.3035t/年	无	240mg/m³	/
	二氧化硫	有组织排放	5	A、C区	10mg/m³0.0334t/年	无	300mg/m³	/
	氯化氢	有组织排放	1	A区	3.17mg/m³0.0672t/年	无	100mg/m³	/
废水	石油类	间断排放	3	A、B、C区污水总排口	0.13mg/m³0.0005t/年	无	20mg/m³	/
	化学需氧量				90mg/m³0.566t/年	无	500mg/L	/
	阴离子表面活性剂				0.216mg/m³0.0016t/年	无	20mg/L	/
	悬浮物				21mg/m³0.21t/年	无	400mg/L	/
