# Supplementary material
Source: ML conference proceedings conference paper supplement (https://openreview.net/forum?id=xg0fmtqh8d)
Supplement: supplementary_material [file 325_拓邦股份:2024年半年度报告(英文版).xlsx]

## Sheet: Sheet
Year	Ending amount	Beginning amount	Remarks
2024	796.72	796.72
2025	2,046,917.10	2,106,518.93
2026	13,323,172.03	14,899,970.42
2027	18,850,821.86	26,254,597.91
2028	33,175,698.37	27,003,257.68
2019 and later	7,869,309.39
No time limit	132,902,900.28	100,528,218.52
Total	208,169,615.75	170,793,360.18
