# Supplementary material
Source: ML conference proceedings conference paper supplement (https://openreview.net/forum?id=xg0fmtqh8d)
Supplement: supplementary_material [file 326_安道麦B:2024年半年度报告(英文版).xlsx]

## Sheet: Sheet
Shareholders	Restricted shares at the opening of the Reporting Period	Restricted shares increased in the Reporting Period	Shares Released from Restricted Sale During the Reporting Period	Restricted shares at the end of the Reporting Period	Restriction reasons	Date of release
Jiang Chenggang	4,500	0	0	4,500	Shares held by a supervisor should be locked up.	Six months after the expiration of the term
Total	4,500	0	0	4,500	--	--
