# Supplementary material
Source: ML conference proceedings conference paper supplement (https://openreview.net/forum?id=xg0fmtqh8d)
Supplement: supplementary_material [file 327_安道麦B:2024年半年度报告(英文版).xlsx]

## Sheet: Sheet
Invested unit	Opening balance	Increase	Decrease	Provision of impairment loss	Closing balance	Balance of Impairment loss
ADAMA Agricultural Solutions Ltd.	15,890,213	-	-	-	15,890,213	-
Adama Anpon (Jiangsu) Ltd.	450,449	-	-	-	450,449	-
ADAMA Hiufeng (Jiangsu) Co. Ltd.	789,116	-	-	-	789,116	(59,024)
Hubei Sanonda Foreign Trade Co.Ltd.	11,993	-	-	-	11,993	-
Adama Huifeng (shanghai)Agricultural Technology Co., Ltd	288,945	-	-	-	288,945	(21,612)
	17,430,716	-	-	-	17,430,716	(80,636)
