# Supplementary material
Source: ML conference proceedings conference paper supplement (https://openreview.net/forum?id=xg0fmtqh8d)
Supplement: supplementary_material [file 328_深赛格B:2024年半年度报告摘要(英文版).xlsx]

## Sheet: Sheet
	Current period	Same period of previous year	Changes over same period of previous year
Operating income (Yuan)	802,063,183.35	939,475,102.76	-14.63%
Net profit attributable to shareholders of the listed company (Yuan)	50,929,722.07	138,369,165.70	-63.19%
Net profit attributable to shareholders of the listed company after deducting non-recurring profit and loss (Yuan)	52,760,733.00	64,708,876.74	-18.46%
Net cash flow from operating activities (Yuan)	36,260,033.88	64,525,896.95	-43.81%
Basic earnings per share (Yuan/share)	0.0414	0.1124	-63.17%
Diluted earnings per share (Yuan/share)	0.0414	0.1124	-63.17%
Weighted average ROE	2.51%	6.93%	-4.42%
	End of current period	End of previous year	Changes over end of previous year
Total assets (Yuan)	5,199,647,460.93	5,380,146,949.27	-3.35%
Net assets attributable to shareholders of the listed company (Yuan)	2,018,054,837.20	2,006,490,243.66	0.58%
