# Supplementary material
Source: ML conference proceedings conference paper supplement (https://openreview.net/forum?id=xg0fmtqh8d)
Supplement: supplementary_material [file 329_南玻B:2024年半年度报告(英文版).xlsx]

## Sheet: Sheet
Item	30 June 2024	1 January 2024
Guaranteed loan	264,263,560	320,893,730
Credit loan	23,426,590	108,426,590
Discounted bills	660,732	7,533,263
Total	288,350,882	436,853,583
