# Supplementary material
Source: ML conference proceedings conference paper supplement (https://openreview.net/forum?id=xg0fmtqh8d)
Supplement: supplementary_material [file 330_阜博集团:中期报告2024.xlsx]

## Sheet: Sheet
	附註	2024年千港元(未經審核)	2023年千港元(未經審核)
經營業務之現金流量
除稅前溢利		69,832	45,135
就以下各項作出調整:
融資成本	6	46,033	50,332
利息收入	4	(1,850)	(2,822)
物業、廠房及設備項目折舊	10	7,860	6,860
使用權資產折舊		6,693	5,325
其他無形資產攤銷		50,691	48,486
消除債務的虧損	15	—	6,195
金融資產 (減值撥回) ╱減值	13	(892)	3,879
應佔聯營公司損益		—	(1)
以公允價值計量且其變動計入損益的金融資產的公允價值變動		415	(212)
股權結算股份補償開支		17,524	18,156
		196,306	181,333
存貨 (增加) ╱減少		(4,678)	15,384
貿易應收款項增加		(152,650)	(276,093)
預付款項、按金及其他應收款項增加		(44,739)	(71,768)
貿易應付款項增加╱(減少)		21,361	199,928
其他應付款項及應計費用增加		20,932	80,507
經營產生的現金		36,532	129,291
已收利息		1,832	2,822
已付海外稅項		(27,346)	(23,387)
經營活動所得現金流量淨額		11,018	108,726
投資活動之現金流量
購買物業、廠房及設備項目	10	(4,569)	(5,634)
添置其他無形資產		(44,510)	(79,670)
購買以公允價值計量且其變動計入損益的金融資產		(433)	(1,226)
投資活動所用現金流量淨額		(49,512)	(86,530)
融資活動之現金流量
發行可換股債券所得款項	16	154,642	—
發行股份所得款項	17	8,588	464,305
計息借貸所得款項	15	62,331	40,144
已抵押存款減少		—	193,493
償還計息借貸	15	(66,568)	(602,243)
已付利息		(33,127)	(56,243)
租賃付款的本金部分		(6,886)	(5,292)
融資活動所得現金流量淨額		118,980	34,164
現金及現金等價物增加淨額		80,486	56,360
期初之現金及現金等價物		240,043	226,495
外匯匯率變動的淨影響		(18,884)	(34,648)
期末之現金及現金等價物		301,645	248,207
現金及現金等價物結餘分析
現金及銀行結餘		184,798	161,228
於獲取時原到期日少於三個月的定期存款		116,847	86,979
現金流量表所列的現金及現金等價物		301,645	248,207
