# Supplementary material
Source: ML conference proceedings conference paper supplement (https://openreview.net/forum?id=xg0fmtqh8d)
Supplement: supplementary_material [file 331_康希诺生物:中期业绩公告截至2024年6月30日止六个月.xlsx]

## Sheet: Sheet
	截至6 月30 日止六個月
	2024年人民幣千元(未經審核)	2023年人民幣千元(未經審核)
結構性存款產品、交易性定期存單、理財產品及衍生工具投資收益	22,321	44,584
政府補助(a)	20,096	45,119
諮詢服務收益	4,972	–
營運服務收益	4,952	–
技術轉讓收益	–	2,547
其他	1,786	1,696
	54,127	93,946
