# Supplementary material
Source: ML conference proceedings conference paper supplement (https://openreview.net/forum?id=xg0fmtqh8d)
Supplement: supplementary_material [file 332_中国储能科技发展:2024中期报告.xlsx]

## Sheet: Sheet
			Unaudited未經審核Six months ended 30 June截至六月三十日止六個月
		Note附註	2024二零二四年HK$’000千港元	2023二零二三年HK$’000千港元
Revenue	收入	3	264,698	228,457
Cost of sales	銷售成本		(190,974)	(173,777)
Gross profit	毛利		73,724	54,680
Other income	其他收入	4	6,242	6,050
Other gains and losses	其他收益及虧損	5	(21,629)	5,728
Reversal of impairment loss on loans to other parties	向其他人士貸款減值虧損撥回		12,330	6,475
Selling and distribution expenses	銷售及分銷開支		(15,656)	(14,856)
Administrative expenses	行政費用		(48,797)	(51,137)
Other operating expenditure	其他經營開支		(5,376)	(6,636)
Profit from operations	經營溢利		838	304
Finance costs	融資成本	6	(2,359)	(1,656)
Loss before tax	除稅前虧損		(1,521)	(1,352)
Income tax expense	所得稅開支	7	(3,265)	(2,339)
Loss for the period	期內虧損	8	(4,786)	(3,691)
Attributable to:	以下各方應佔：
Owners of the Company	本公司擁有人		(3,908)	(4,831)
Non-controlling interests	非控股權益		(878)	1,140
			(4,786)	(3,691)
Loss per share	每股虧損
Basic (HK cents per share)	基本（每股港仙）	10	1.96	2.98
Diluted (HK cents per share)	攤薄（每股港仙）		N/A 不適用	N/A 不適用
Loss for the period	期內虧損		(4,786)	(3,691)
Other comprehensive expense for the period, net of tax	期內其他全面開支，扣除稅項
Item that will be reclassified to profit or loss:Exchange differences on translating foreign operations	將重新分類至損益的項目：換算海外業務之匯兌差額		(5,368)	(7,044)
Other comprehensive expense for the period, net of tax	期內其他全面開支，扣除稅項		(5,368)	(7,044)
Total comprehensive expense for the period	期內全面開支總額		(10,154)	(10,735)
Attributable to:	以下各方應佔：
Owners of the Company	本公司擁有人		(9,276)	(11,875)
Non-controlling interests	非控股權益		(878)	1,140
			(10,154)	(10,735)
