# Supplementary material
Source: ML conference proceedings conference paper supplement (https://openreview.net/forum?id=xg0fmtqh8d)
Supplement: supplementary_material [file 333_洛阳钼业:中期报告2024.xlsx]

## Sheet: Sheet
項目	期初餘額	本期增加	本期減少	期末餘額
安全生產費	140,310,748.25	99,432,226.47	27,234,647.19	212,508,327.53
合計	140,310,748.25	99,432,226.47	27,234,647.19	212,508,327.53
