# Supplementary material
Source: ML conference proceedings conference paper supplement (https://openreview.net/forum?id=xg0fmtqh8d)
Supplement: supplementary_material [file 334_文业集团:2024中期报告.xlsx]

## Sheet: Sheet
	於2024年6月30日人民幣千元	於2023年12月31日人民幣千元
應要求或1年內	82,376	71,832
第3年至第5年(包括首尾兩年)	18,396	16,172
	100,772	98,649
減:於12個月內到期償還的金額(於流動負債下呈列)	(82,376)	(71,832)
於12個月後到期償還的金額	18,396	26,817
