# Supplementary material
Source: ML conference proceedings conference paper supplement (https://openreview.net/forum?id=xg0fmtqh8d)
Supplement: supplementary_material [file 335_春立医疗:中期报告2024.xlsx]

## Sheet: Sheet
項目	附註	本期發生額	上期發生額
一、營業收入	五（三十）	380,130,570.92	540,706,888.57
減：營業成本	五（三十）	108,247,815.46	149,300,529.61
稅金及附加	五（三十一）	4,342,874.75	4,021,717.04
銷售費用	五（三十二）	111,481,168.80	166,890,048.29
管理費用	五（三十三）	21,310,062.04	18,957,836.76
研發費用	五（三十四）	67,659,413.06	74,572,384.70
財務費用	五（三十五）	–9,012,489.46	–4,993,937.49
其中：利息費用		27,050.23	39,312.28
利息收入		8,040,034.97	4,458,526.31
加：其他收益	五（三十六）	6,413,483.27	4,015,733.88
投資收益 (損失以「–」號填列)	五（三十七）	6,084,909.58	10,067,668.50
其中：對聯營企業和合營企業的投資收益
以攤餘成本計量的金融資產終止確認收益
淨敞口套期收益(損失以「–」號填列)
公允價值變動收益 (損失以「–」號填列)	五（三十八）	4,670,205.47	4,382,142.85
信用減值損失(損失以「–」號填列)	五（三十九）	–5,794,060.61	–8,788,283.97
資產減值損失(損失以「–」號填列)	五（四十）	–5,229,285.17	–3,175,940.28
資產處置收益 (損失以「–」號填列)	五（四十一）	39,213.61
二、營業利潤 (虧損以「–」號填列)		82,286,192.42	138,459,630.64
加：營業外收入	五（四十二）	856,684.38	286,636.36
減：營業外支出	五（四十三）	72,914.25	209,028.67
三、利潤總額(虧損總額以「–」號填列)		83,069,962.55	138,537,238.33
減:所得稅費用	五（四十四）	4,109,067.77	12,552,076.63
四、 淨利潤（淨虧損以「–」號填列）		78,960,894.78	125,985,161.70
（一） 按經營持續性分類：
1. 持續經營淨利潤（淨虧損以「–」號填列）		78,960,894.78	125,985,161.70
2. 終止經營淨利潤（淨虧損以「–」號填列）
（二） 按所有權歸屬分類：
1. 歸屬於母公司股東的淨利潤（淨虧損以「–」號填列）		79,026,078.82	126,077,038.00
2. 少數股東損益（淨虧損以「–」號填列）		–65,184.04	–91,876.30
五、 其他綜合收益的稅後淨額
（一） 歸屬母公司股東的其他綜合收益的稅後淨額
1. 不能重分類進損益的其他綜合收益
2. 將重分類進損益的其他綜合收益
（二） 歸屬於少數股東的其他綜合收益的稅後淨額
六、 綜合收益總額		78,960,894.78	125,985,161.70
（一） 歸屬於母公司股東的綜合收益總額		79,026,078.82	126,077,038.00
（二） 歸屬於少數股東的綜合收益總額		–65,184.04	–91,876.30
七、 每股收益
（一） 基本每股收益		0.21	0.33
（二） 稀釋每股收益		0.21	0.33
