# Supplementary material
Source: ML conference proceedings conference paper supplement (https://openreview.net/forum?id=xg0fmtqh8d)
Supplement: supplementary_material [file 336_东方电气:2024中期报告.xlsx]

## Sheet: Sheet
坏账准备	第一阶段	第二阶段	第三阶段	合计
	未来12个月预期信用损失	整个存续期预期信用损失(未发生信用减值)	整个存续期预期信用损失(已发生信用减值)
期初余额	9,086,182.71			9,086,182.71
期初余额在本期
--转入第二阶段
--转入第三阶段
--转回第二阶段
--转回第一阶段
本期计提	295,119.87			295,119.87
本期转回
本期转销
本期核销
其他变动
期末余额	9,381,302.58			9,381,302.58
