# Supplementary material
Source: ML conference proceedings conference paper supplement (https://openreview.net/forum?id=xg0fmtqh8d)
Supplement: supplementary_material [file 337_上海电气:2024年第一季度报告.xlsx]

## Sheet: Sheet
項目	2024年第一季度	2023年第一季度
一、經營活動產生的現金流量:
銷售商品、提供勞務收到的現金	27,727,378	24,875,004
客戶存款和同業存放款項淨增加額
向中央銀行借款淨增加額
向其他金融機構拆入資金淨增加額
收到原保險合同保費取得的現金
收到再保業務現金淨額
保戶儲金及投資款淨增加額
收取利息、手續費及佣金的現金
拆入資金淨增加額
回購業務資金凈增加額
代理買賣證券收到的現金淨額
收到的稅費返還	146,335	153,249
收到其他與經營活動有關的現金	1,090,970	954,281
經營活動現金流入小計	28,964,683	25,982,534
購買商品、接受勞務支付的現金	23,777,023	22,951,844
客戶貸款及墊款淨增加額
存放中央銀行和同業款項淨增加額
支付原保險合同賠付款項的現金
拆出資金淨增加額
支付利息、手續費及傭金的現金
支付保單紅利的現金
支付給職工及為職工支付的現金	3,924,014	3,817,693
支付的各項稅費	1,324,596	1,383,181
支付其他與經營活動有關的現金	6,871,288	7,060,761
經營活動現金流出小計	35,896,921	35,213,479
經營活動產生的現金流量淨額	-6,932,238	-9,230,945
二、投資活動產生的現金流量:
收回投資收到的現金	3,184,251	2,903,557
取得投資收益收到的現金	213,583	236,121
處置固定資產、無形資產和其他長期資產收回的現金淨額	11,052	16,247
處置子公司及其他營業單位收到的現金淨額
收到其他與投資活動有關的現金	361,729	152,220
投資活動現金流入小計	3,770,615	3,308,145
購建固定資產、無形資產和其他長期資產支付的現金	738,930	1,016,973
投資支付的現金	1,427,396	3,438,151
質押貸款淨增加額
處置子公司及其他營業單位支付的現金淨額		14,447
支付其他與投資活動有關的現金	774,921
投資活動現金流出小計	2,941,247	4,469,571
投資活動產生的現金流量淨額	829,368	-1,161,426
三、籌資活動產生的現金流量：
吸收投資收到的現金	11,520	14,900
其中：子公司吸收少數股東投資收到的現金	11,520	14,900
取得借款收到的現金	4,747,920	3,655,970
發行債券所收到的現金	1,499,190
收到其他與籌資活動有關的現金		37,016
籌資活動現金流入小計	6,258,630	3,707,886
償還債務支付的現金	4,240,391	1,594,529
分配股利、利潤或償付利息支付的現金	515,409	591,596
其中：子公司支付給少數股東的股利、利潤	41,606	228,176
支付其他與籌資活動有關的現金	76,432	66,954
籌資活動現金流出小計	4,832,232	2,253,079
籌資活動產生的現金流量淨額	1,426,398	1,454,807
四、匯率變動對現金及現金等價物的影響	-3,239	-79,979
五、現金及現金等價物淨增加額	-4,679,711	-9,017,543
加：期初現金及現金等價物餘額	38,273,719	43,785,108
六、期末現金及現金等價物餘額	33,594,008	34,767,565
