# Supplementary material
Source: ML conference proceedings conference paper supplement (https://openreview.net/forum?id=xg0fmtqh8d)
Supplement: supplementary_material [file 338_深物业B:2024年半年度报告(英文版).xlsx]

## Sheet: Sheet
Item	H1 2024	H1 2023
1. Operating revenue	32,037,213.48	1,003,621,923.84
Less: Cost of sales	24,213,582.29	698,031,149.77
Taxes and surcharges	2,975,547.74	8,373,564.71
Selling expense	399,234.24	406,096.84
Administrative expense	32,750,591.60	47,358,840.75
R&D expense
Finance costs	3,676,713.49	6,675,706.20
Including: Interest expense	17,711,062.01	13,125,188.51
Interest income	14,208,379.57	3,531,500.73
Add: Other income	176,813.10	252,975.99
Return on investment (“-” for loss)	412,742.53	1,857,388.32
Including: Share of profit or loss of joint ventures and associates	412,742.53	1,857,388.32
Income from the derecognition of financial assets at amortized cost (“-” for loss)
Net gain on exposure hedges (“-” for loss)
Gain on changes in fair value (“-” for loss)
Credit impairment loss (“-” for loss)	-6,611,482.03	482,276.30
Asset impairment loss (“-” for loss)
Asset disposal income (“-” for loss)		111,000.73
2. Operating profit (“-” for loss)	-38,000,382.28	245,480,206.91
Add: Non-operating income	20,972.63	413,371.19
Less: Non-operating expense	12,800.05	15,573.60
3. Profit before tax (“-” for loss)	-37,992,209.70	245,878,004.50
Less: Income tax expense	-9,903,877.81	62,647,086.56
4. Net profit (“-” for net loss)	-28,088,331.89	183,230,917.94
4.1 Net profit from continuing operations (“-” for net loss)	-28,088,331.89	183,230,917.94
4.2 Net profit from discontinued operations (“-” for net loss)
5. Other comprehensive income, net of tax	-203,351.55	-275,978.56
5.1 Items that will not be reclassified to profit or loss	-203,351.55	-275,978.56
5.1.1 Changes caused by remeasurements on defined benefit schemes
5.1.2 Other comprehensive income that will not be reclassified to profit or loss under the equity method
5.1.3 Changes in the fair value of investments in other equity instruments	-203,351.55	-275,978.56
5.1.4 Changes in the fair value arising from changes in own credit risk
5.1.5 Other
5.2 Items that will be reclassified to profit or loss
5.2.1 Other comprehensive income that will be reclassified to profit or loss under the equity method
5.2.2 Changes in the fair value of investments in other debt obligations
5.2.3 Other comprehensive income arising from the reclassification of financial assets
5.2.4 Credit impairment allowance for investments in other debt obligations
5.2.5 Reserve for cash flow hedges
5.2.6 Differences arising from the translation of foreign currency- denominated financial statements
5.2.7 Other
6. Total comprehensive income	-28,291,683.44	182,954,939.38
7. Earnings per share
7.1 Basic earnings per share
7.2 Diluted earnings per share
