# Supplementary material
Source: ML conference proceedings conference paper supplement (https://openreview.net/forum?id=xg0fmtqh8d)
Supplement: supplementary_material [file 339_三七互娱:2024年半年度报告摘要(英文版).xlsx]

## Sheet: Sheet
Item	H1 2024
	Equity attributable to shareholders of the Company													Non-controlling interests	Total shareholders' equity
	Share capital	Other equity instruments			Capital reserves	Less: Treasury shares	Other comprehensive income	Special reserves	Surplus reserves	General risk reserves	Retained earnings	Others	Sub-total
		Preferred shares	Perpetual bonds	Othe rs
1. Balance as at the end of prior year	2,217,864,281 .00				2,823,040,832 .04	300,524,65 6.78	-129,511,563.25		666,869,94 0.33		7,429,206,642 .53		12,706,945,4 75.87	105,416,93 2.47	12,812,362, 408.34
Add: Adjustments for changed accounting policies
Adjustments for corrections of previous errors
Others
2. Balance as at beginning of year	2,217,864,281 .00				2,823,040,832 .04	300,524,65 6.78	-129,511,563.25		666,869,94 0.33		7,429,206,642 .53		12,706,945,4 75.87	105,416,93 2.47	12,812,362, 408.34
3. Increase/ decrease in the period (“-” for decrease)					40,875,956.38	100,704,43 9.97	9,364,108.68				- 11,192,145.77		- 61,656,520.6 8	4,575,943.3 6	- 57,080,577. 32
3.1 Total comprehensive income							9,363,301.68				1,264,633,578 .95		1,273,996,88 0.63	-31,206.53	1,273,965,6 74.10
3.2 Capital contribution and withdrawal by shareholders					40,875,956.38	100,704,43 9.97							- 59,828,483.5 9	4,607,149.8 9	- 55,221,333. 70
3.2.1 Common shares contribution and withdrawal by shareholders														-140,051.00	-140,051.00
3.2.2 Capital contribution and withdrawal by holders of other equity instruments
3.2.3 Share-based payments included in shareholders'equity					40,875,956.38								40,875,956.38	89,797.88	40,965,754.26
3.2.4 Others						100,704,439.97							100,704,439.97	4,657,403.01	96,047,036.96
3.3 Profit distribution											1,275,824,917.72		1,275,824,917.72		1,275,824.917.72
3.3.1 Appropriation to surplus reserves
3.3.2 Appropriation to general risk reserves
3.3.3 Distribution to shareholders											1,275,824,917.72		1,275,824,917.72		1,275,824,917.72
3.3.4 Others
3.4 Internal transfers within shareholders equity							807.00				-807.00
3.4.1 Capital reserves transferred into capital (or share capital)
3.4.3 Surplus reserves for making up losses
3.4.4 Changes in defined benefit pension schemes transferred into retained earnings
3.4.5 Other comprehensive income transferred into retained earnings
3.4.6 Others
3.5 Special reserves
3.5.1 Increase in the period
3.5.2 Used in the period
3.6 Others					-274,125.00								-274,125.00		-274,125.00
4. Balance as at the end of the period	2,217,864,281.00				2,852,169,276.30	83,105,950.55	-99,115,449.05		666,869,940.33		6,989,093,914.46		12,543,776,012.49	111,430,117.90	12,655,206,130.39
