# Supplementary material
Source: ML conference proceedings conference paper supplement (https://openreview.net/forum?id=xg0fmtqh8d)
Supplement: supplementary_material [file 340_长飞光纤光缆:中期报告2024.xlsx]

## Sheet: Sheet
		Opening balance 期初餘額	Addition during the Period 本期增加	Decrease during the Period 本期減少	Closing balance 期末餘額
Salary, bonus, subsidy and grants	工資、獎金、 津貼和補貼	513,057,281	588,016,131	(756,185,662)	344,887,750
Staff welfare	職工福利費	4,044,106	20,474,580	(18,346,380)	6,172,306
Social insurance	社會保險費	4,299,901	41,383,874	(41,595,358)	4,088,417
– Medical insurance	-醫療保險費	4,076,628	40,104,703	(40,445,530)	3,735,801
– Work injury	-工傷保險費	61,468	1,113,381	(1,130,724)	44,125
– Maternity insurance	-生育保險費	161,805	165,790	(19,104)	308,491
Housing fund	住房公積金	1,134,795	49,151,574	(49,003,555)	1,282,814
Union expenses and employees education expenses	工會經費和職工教育經費	6,211,631	6,056,685	(7,030,326)	5,237,990
Total	合計	528,747,714	705,082,844	(872,161,281)	361,669,277
