# Supplementary material
Source: ML conference proceedings conference paper supplement (https://openreview.net/forum?id=xg0fmtqh8d)
Supplement: supplementary_material [file 341_江铃B:2024年半年度报告(英文版).xlsx]

## Sheet: Sheet
Item	Note	2024 First Half-year Consolidated*	2023 First Half-year Consolidated*	2024 First Half-year Company*	2023 First Half-year Company*
Cash flows generated from operating activities
Cash received from sales of goods or rendering of services		18,941,092,268	17,406,530,446	18,741,276,443	16,222,462,727
Refunds of taxes		164,581,363	304,302,316	164,581,363	304,302,316
Cash received relating to other operating activities	4(58)	118,884,525	405,291,238	95,504,577	387,595,895
Sub-total of cash inflows		19,224,558,156	18,116,124,000	19,001,362,383	16,914,360,938
Cash paid for goods and services		(14,491,870,430)	(12,996,163,395)	(13,973,193,906)	(12,477,732,638)
Cash paid to and on behalf of employees		(1,478,169,089)	(1,214,500,391)	(1,350,502,965)	(1,096,589,996)
Payments of taxes and surcharges		(1,462,969,310)	(1,103,139,617)	(1,420,869,779)	(1,073,581,827)
Cash paid relating to other operating activities	4(58)	(1,058,219,650)	(1,145,172,260)	(642,894,199)	(744,011,957)
Sub-total of cash outflows		(18,491,228,479)	(16,458,975,663)	(17,387,460,849)	(15,391,916,418)
Net cash flows generated from operating activities	4(59)	733,329,677	1,657,148,337	1,613,901,534	1,522,444,520
Cash flows used in investing activities
Cash received from disposal of investments	4(58)	400,000,000	-	-	-
Cash received from returns on investments		6,789,112	-	4,136,400	-
Net cash received from disposal of fixed assets, intangible assets and other long-term assets		9,005,122	795,730	7,544,579	1,676,649
Cash received from disposal of subsidiaries and other business units		-	36,000,000	-	36,000,000
Cash received relating to other investing activities	4(58)	128,144,704	103,235,093	103,696,833	76,225,119
Sub-total of cash inflows		543,938,938	140,030,823	115,377,812	113,901,768
Cash paid to acquire fixed assets, intangible assets and other long-term assets		(832,578,865)	(698,245,427)	(835,883,605)	(696,001,267)
Cash paid to acquire investments	4(58)	(400,000,000)	(100,000,000)	-	(53,167,203)
Cash paid relating to other investing activities		(116,333)	(88,707)	(116,333)	(88,707)
Sub-total of cash outflows		(1,232,695,198)	(798,334,134)	(835,999,938)	(749,257,177)
Net cash flows used in investing activities		(688,756,260)	(658,303,311)	(720,622,126)	(635,355,409)
Cash flows used in financing activities
Cash received from absorbing investments		-	49,000,000	-	-
Including: cash received by the subsidiary from absorbing minority shareholders' investment		-	49,000,000	-	-
Cash received from borrowings		995,542,778	2,586,819,167	995,542,778	2,091,194,167
Cash received from other financing activities		661,625	-	-	-
Sub-total of cash inflows		996,204,403	2,635,819,167	995,542,778	2,091,194,167
Cash repayments of borrowings		(1,802,237,020)	(2,406,409,044)	(1,802,237,020)	(2,406,409,044)
Cash payments for distribution of dividends, profits or interest expenses		(4,455,249)	(3,335,711)	(4,455,249)	(3,335,711)
Cash paid relating to other financing activities	4(58)	(12,923,965)	(509,449,108)	(8,831,429)	(5,865,317)
Sub-total of cash outflows		(1,819,616,234)	(2,919,193,863)	(1,815,523,698)	(2,415,610,072)
Net cash flows used in financing activities		(823,411,831)	(283,374,696)	(819,980,920)	(324,415,905)
Effect of foreign exchange rate changes on cash and cash equivalents		-	-	-	-
Net (decrease)/increase in cash and cash equivalents	4(59)	(778,838,414)	715,470,330	73,298,488	562,673,206
Add: Cash and cash equivalents at beginning of year	4(59)	11,746,518,615	8,543,193,654	8,648,791,242	6,863,577,337
Cash and cash equivalents at end of period	4(59)	10,967,680,201	9,258,663,984	8,722,089,730	7,426,250,543
