# Supplementary material
Source: ML conference proceedings conference paper supplement (https://openreview.net/forum?id=xg0fmtqh8d)
Supplement: supplementary_material [file 342_五粮液:宜宾五粮液股份有限公司2024年半年度报告(英文版).xlsx]

## Sheet: Sheet
Aging	Closing gross amount	Opening gross amount
Within 1 year (inclusive)	41,652,300.09	31,302,289.55
1 to 2 years	7,338,841.03	4,460,593.08
2 to 3 years	1,250,482.00	1,394,469.00
More than 3 years	11,901,543.49	12,353,276.08
3 to 4 years	1,054,607.12	1,069,474.75
4 to 5 years	1,089,285.45	2,768,887.33
More than 5 years	9,757,650.92	8,514,914.00
Total	62,143,166.61	49,510,627.71
