# Supplementary material
Source: ML conference proceedings conference paper supplement (https://openreview.net/forum?id=xg0fmtqh8d)
Supplement: supplementary_material [file 345_江铃B:江铃汽车股份有限公司2024年第一季度报告(英文版).xlsx]

## Sheet: Sheet
ASSETS	31 March 2024 Consolidated*	31 December 2023 Consolidated
Current assets
Cash and cash equivalents	10,098,337,815.00	11,830,560,675.00
Financial assets held for trading	200,604,877.00	200,604,877.00
Derivative financial assets	3,334,732.00	-
Notes receivable	-	14,621,337.00
Accounts receivable	3,754,430,715.00	4,401,826,022.00
Financing receivables	306,328,811.00	123,170,062.00
Advances to suppliers	102,548,460.00	204,358,759.00
Other receivables	91,972,594.00	75,319,848.00
Inventories	2,068,770,281.00	1,560,259,511.00
Current portion of non-current assets	16,756,382.00	15,749,806.00
Other current assets	1,196,350,962.00	951,659,556.00
Total current assets	17,839,435,629.00	19,378,130,453.00
Non-current assets
Long-term receivables	21,373,656.00	22,775,696.00
Long-term equity investments	232,647,414.00	233,798,348.00
Fixed assets	5,465,061,878.00	5,389,645,152.00
Construction in progress	518,840,266.00	464,431,412.00
Right-of-use assets	175,670,073.00	194,836,028.00
Intangible assets	1,835,932,819.00	1,691,021,121.00
Development expenditures	114,525,277.00	283,738,155.00
Goodwill	-	-
Deferred tax assets	1,552,498,811.00	1,472,003,554.00
Other non-current assets	10,071,060.00	10,807,967.00
Total non-current assets	9,926,621,254.00	9,763,057,433.00
TOTAL ASSETS	27,766,056,883.00	29,141,187,886.00
Current liabilities
Short-term borrowings	400,000,000.00	1,300,000,000.00
Derivative financial liabilities	-	459,306.00
Accounts payable	8,626,384,262.00	9,476,215,223.00
Contract liabilities	342,393,601.00	243,740,992.00
Employee benefits payable	717,747,356.00	890,051,287.00
Taxes payable	158,248,300.00	118,399,765.00
Other payables	6,117,884,066.00	5,944,976,093.00
Current portion of non-current liabilities	92,585,233.00	93,383,898.00
Other current liabilities	383,697,646.00	373,948,630.00
Total current liabilities	16,838,940,464.00	18,441,175,194.00
Non-current liabilities
Long-term borrowings	1,393,831.00	1,391,414.00
Lease liabilities	69,155,603.00	138,005,943.00
Long-term employee benefits payable	51,986,229.00	52,891,000.00
Provisions	324,493,304.00	315,700,263.00
Deferred income	66,269,618.00	67,601,361.00
Deferred tax liabilities	19,114,078.00	19,256,890.00
Other non-current liabilities	169,906,115.00	120,293,201.00
Total non-current liabilities	702,318,778.00	715,140,072.00
Total liabilities	17,541,259,242.00	19,156,315,266.00
Equity
Share capital	863,214,000.00	863,214,000.00
Capital surplus	839,442,490.00	839,442,490.00
Other comprehensive income	-20,572,000.00	-20,572,000.00
Special reserve	4,677,056.00	3,821,625.00
Surplus reserve	431,607,000.00	431,607,000.00
Retained earnings	8,714,997,543.00	8,232,632,623.00
Total equity attributable to shareholders of the Company	10,833,366,089.00	10,350,145,738.00
Minority interests	-608,568,448.00	-365,273,118.00
Total equity	10,224,797,641.00	9,984,872,620.00
TOTAL LIABILITIES AND EQUITY	27,766,056,883.00	29,141,187,886.00
