# Supplementary material
Source: ML conference proceedings conference paper supplement (https://openreview.net/forum?id=xg0fmtqh8d)
Supplement: supplementary_material [file 346_招商银行:2024年中期报告.xlsx]

## Sheet: Sheet
	2024年6月30日				2023年12月31日
(人民幣百萬元,百分比除外)	貸款和墊款金額	佔總額百分比%	不良貸款金額	不良貸款率%(1)	貸款和墊款金額	佔總額百分比%	不良貸款金額	不良貸款率%(1)
公司貸款	2,771,833	41.08	31,385	1.13	2,599,855	39.94	30,992	1.19
製造業	609,662	9.03	2,920	0.48	577,026	8.87	3,063	0.53
交通運輸、倉儲和郵政業	527,699	7.82	1,400	0.27	513,264	7.89	1,739	0.34
房地產業	339,938	5.04	17,396	5.12	326,667	5.02	17,183	5.26
電力、熱力、燃氣及水生產和供應業	307,383	4.56	417	0.14	272,223	4.18	443	0.16
批發和零售業	208,743	3.09	1,414	0.68	197,739	3.04	1,330	0.67
租賃和商務服務業	200,107	2.97	1,514	0.76	192,670	2.96	1,470	0.76
建築業	134,688	2.00	899	0.67	111,200	1.71	333	0.30
金融業	134,656	2.00	381	0.28	133,664	2.05	387	0.29
信息傳輸、軟件和信息技術服務業	124,070	1.84	786	0.63	103,717	1.59	760	0.73
採礦業	50,459	0.75	561	1.11	47,271	0.73	567	1.20
水利、環境和公共設施管理業	42,101	0.62	372	0.88	43,232	0.66	101	0.23
其他(2)	92,327	1.36	3,325	3.60	81,182	1.24	3,616	4.45
票據貼現	434,817	6.44	–	–	471,127	7.24	–	–
零售貸款	3,541,154	52.48	32,042	0.90	3,437,883	52.82	30,587	0.89
貸款和墊款總額	6,747,804	100.00	63,427	0.94	6,508,865	100.00	61,579	0.95
