# Supplementary material
Source: ML conference proceedings conference paper supplement (https://openreview.net/forum?id=xg0fmtqh8d)
Supplement: supplementary_material [file 347_招商银行:2024年中期报告.xlsx]

## Sheet: Sheet
	2024年6月30日				2023年12月31日
(人民幣百萬元,百分比除外)	貸款和墊款金額	佔總額百分比%	不良貸款金額	不良貸款率%(1)	貸款和墊款金額	佔總額百分比%	不良貸款金額	不良貸款率%(1)
總行(2)	1,015,006	15.04	17,874	1.76	973,646	14.96	18,011	1.85
長江三角洲地區	1,505,078	22.30	12,886	0.86	1,441,147	22.14	10,489	0.73
環渤海地區	936,935	13.89	5,838	0.62	930,205	14.29	5,745	0.62
珠江三角洲及海西地區	1,233,058	18.27	8,462	0.69	1,186,286	18.23	7,941	0.67
東北地區	170,005	2.52	1,923	1.13	168,929	2.60	1,862	1.10
中部地區	718,638	10.65	6,037	0.84	686,673	10.55	6,514	0.95
西部地區	717,929	10.64	4,856	0.68	686,701	10.55	5,820	0.85
境外	85,460	1.27	872	1.02	80,336	1.23	851	1.06
附屬機構	365,695	5.42	4,679	1.28	354,942	5.45	4,346	1.22
貸款和墊款總額	6,747,804	100.00	63,427	0.94	6,508,865	100.00	61,579	0.95
