# Supplementary material
Source: ML conference proceedings conference paper supplement (https://openreview.net/forum?id=xg0fmtqh8d)
Supplement: supplementary_material [file 349_中国外运:二零二四年第一季度报告.xlsx]

## Sheet: Sheet
項目	2024年第一季度	2023年第一季度
一、經營活動產生的現金流量：
銷售商品、提供勞務收到的現金	23,280,433,544.07	21,507,978,909.98
收到的稅費返還	2,541,948.38	35,742,612.30
收到其他與經營活動有關的現金	488,118,882.22	458,906,277.13
經營活動現金流入小計	23,771,094,374.67	22,002,627,799.41
購買商品、接受勞務支付的現金	23,195,125,166.42	18,971,424,520.74
支付給職工及為職工支付的現金	2,272,943,491.42	2,264,123,357.93
支付的各項稅費	593,748,037.94	485,160,596.38
支付其他與經營活動有關的現金	419,613,010.45	435,512,009.08
經營活動現金流出小計	26,481,429,706.23	22,156,220,484.13
經營活動產生的現金流量淨額	-2,710,335,331.56	-153,592,684.72
二、投資活動產生的現金流量：
收回投資收到的現金
取得投資收益收到的現金	0.00	5,168,041.35
處置固定資產、無形資產和其他長期資產收回的現金淨額	49,761,723.25	53,006,923.57
處置子公司及其他營業單位收到的現金淨額
收到其他與投資活動有關的現金	8,484,075.88	21,307,049.35
投資活動現金流入小計	58,245,799.13	79,482,014.27
購建固定資產、無形資產和其他長期資產支付的現金	316,584,191.94	336,126,358.67
投資支付的現金	42,000,000.00	48,000,000.00
取得子公司及其他營業單位支付的現金淨額	0.00	936,000.00
支付其他與投資活動有關的現金	47,263,184.56	159,360,176.00
投資活動現金流出小計	405,847,376.50	544,422,534.67
投資活動產生的現金流量淨額	-347,601,577.37	-464,940,520.40
三、籌資活動產生的現金流量：
吸收投資收到的現金	4,250,000.00	88,448,189.89
其中：子公司吸收少數股東投資收到的現金	4,250,000.00	88,448,189.89
取得借款收到的現金	255,587,540.24	80,078,810.29
收到其他與籌資活動有關的現金	82,716,987.16	0.00
籌資活動現金流入小計	342,554,527.40	168,527,000.18
償還債務支付的現金	92,467,693.69	75,185,597.77
分配股利、利潤或償付利息支付的現金	74,552,422.79	81,629,288.20
其中：子公司支付給少數股東的股利、利潤	7,945,937.69	0.00
支付其他與籌資活動有關的現金	191,785,935.87	198,219,932.27
籌資活動現金流出小計	358,806,052.35	355,034,818.24
籌資活動產生的現金流量淨額	-16,251,524.95	-186,507,818.06
四、匯率變動對現金及現金等價物的影響	16,468,072.30	-107,575,878.34
五、現金及現金等價物淨增加額	-3,057,720,361.58	-912,616,901.52
加：期初現金及現金等價物餘額	13,821,461,962.17	16,405,563,975.61
六、期末現金及現金等價物餘額	10,763,741,600.59	15,492,947,074.09
