# Supplementary material
Source: ML conference proceedings conference paper supplement (https://openreview.net/forum?id=xg0fmtqh8d)
Supplement: supplementary_material [file 350_深南电B:2024年半年度报告(英文版).xlsx]

## Sheet: Sheet
Item	Ending balance	Ending balance of previous year
Large-amount negotiable certificate of deposit and accrued interest	231,461,407.75	225,278,591.79
Land acquisition, storage, production and business suspension, employee compensation and relocation expenses, etc. (Note)	43,889,714.09
Amount of input value-added tax to be deducted	6,583,089.98	996,267.20
Prepaid income tax	5,894,509.31	6,583,089.98
Others	8,019.66	8,019.66
Total	287,836,740.79	232,865,968.63
