# Supplementary material
Source: ML conference proceedings conference paper supplement (https://openreview.net/forum?id=xg0fmtqh8d)
Supplement: supplementary_material [file 351_广发证券:二零二四年第一季度报告.xlsx]

## Sheet: Sheet
項目	本期發生額	上期發生額
一、經營活動產生的現金流量：
融出資金淨減少額	3,628,007,986.91	-
收取利息、手續費及佣金的現金	5,818,908,945.17	6,379,239,638.37
拆入資金淨增加額	5,177,242,689.63	-
回購業務資金淨增加額	66,129,334,231.01	34,976,259,669.16
收到其他與經營活動有關的現金	3,867,946,107.04	6,552,060,127.93
經營活動現金流入小計	84,621,439,959.76	47,907,559,435.46
交易性金融工具現金淨減少額	89,084,190,949.55	40,828,802,390.12
融出資金淨增加額	-	3,511,263,834.51
支付利息、手續費及佣金的現金	1,556,595,741.79	1,355,519,347.88
代理買賣證券支出的現金淨額	1,536,152,600.21	171,687,869.88
代理承銷證券支出的現金淨額	-	109,300,000.00
拆入資金淨減少額	-	512,852,237.66
支付給職工及為職工支付的現金	1,638,579,321.35	1,568,187,788.56
支付的各項稅費	482,786,415.38	815,310,087.66
支付其他與經營活動有關的現金	2,184,911,364.07	3,616,667,432.09
經營活動現金流出小計	96,483,216,392.35	52,489,590,988.36
經營活動產生的現金流量淨額	-11,861,776,432.59	-4,582,031,552.90
二、投資活動產生的現金流量：
收回投資所收到的現金	9,206,428,156.40	2,726,613,448.47
取得投資收益收到的現金	984,026,341.09	868,657,316.31
處置固定資產、無形資產和其他長期資產收回的現金淨額	1,347,950.43	5,634,929.78
投資活動現金流入小計	10,191,802,447.92	3,600,905,694.56
投資支付的現金	1,384,366,341.06	51,163,463.43
購建固定資產、無形資產和其他長期資產支付的現金	199,531,263.06	247,053,160.36
投資活動現金流出小計	1,583,897,604.12	298,216,623.79
投資活動產生的現金流量淨額	8,607,904,843.80	3,302,689,070.77
三、籌資活動產生的現金流量：
吸收投資收到的現金	2,000,000,000.00	500,000,000.00
其中：發行永續債收到的現金	2,000,000,000.00	500,000,000.00
取得借款收到的現金	643,037,383.04	202,942,973.48
發行債券收到的現金	16,000,000,000.00	24,300,000,000.00
收到其他與籌資活動有關的現金	5,429,052,406.45	4,259,008,882.16
籌資活動現金流入小計	24,072,089,789.49	29,261,951,855.64
償還債務支付的現金	9,292,175,685.23	25,147,598,107.77
分配股利、利潤或償付利息支付的現金	778,153,330.93	870,391,818.68
其中：子公司支付給少數股東的股利、利潤	-	-
支付其他與籌資活動有關的現金	5,706,958,454.55	3,869,881,910.06
籌資活動現金流出小計	15,777,287,470.71	29,887,871,836.51
資活動產生的現金流量淨額	8,294,802,318.78	-625,919,980.87
四、匯率變動對現金及現金等價物的影響	17,433,140.30	-180,869,093.66
五、現金及現金等價物淨增加額	5,058,363,870.29	-2,086,131,556.66
加：期初現金及現金等價物餘額	146,004,891,075.14	149,831,673,420.82
六、期末現金及現金等價物餘額	151,063,254,945.43	147,745,541,864.16
