# Supplementary material
Source: ML conference proceedings conference paper supplement (https://openreview.net/forum?id=xg0fmtqh8d)
Supplement: supplementary_material [file 352_顺丰控股:2024年半年度报告(英文版).xlsx]

## Sheet: Sheet
		For the six months ended 30 June
	Type of the leased asset	2024	2023
Entities controlled by the Company’s ultimate controlling person	Buildings	2,058	27,183
Associates of the Group	Buildings	265	12,093
		2,323	39,276
