# Supplementary material
Source: ML conference proceedings conference paper supplement (https://openreview.net/forum?id=xg0fmtqh8d)
Supplement: supplementary_material [file 353_粤高速B:2024年半年度报告(英文版).xlsx]

## Sheet: Sheet
Project name	Investment method	Fixed investments or not	Industry involved in investment projects	Investment amount in this reporting period	Accrued Actual Investment Amount up to the End of Reporting Period	Capital Source	Project schedule	Anticipated income	Accrued Realized Income up to the End of Reporting Period	Reasons for not Reaching the Planned Schedule and Anticipated Income	Disclosure date	Disclosure Index
Nansha- Zhuhai Section of Guangzhou- Macao Expressway Was rebuilt and Expanded	Self-built	Yes	Expressway	476,407,516.16	2,124,802,034.64	Self and Loan	15.47%			N/A	October 22,2022	Announcement of Resolution of the Second (Provisional) Meeting the Tenth Board of Directors； Announcement of External Investment
Total	--	--	--	476,407,516.16	2,124,802,034.64	--	--			--	--	--
