# Supplementary material
Source: ML conference proceedings conference paper supplement (https://openreview.net/forum?id=xg0fmtqh8d)
Supplement: supplementary_material [file 355_600482-中国动力-中国船舶重工集团动力股份有限公司2024年半年度报告_2024-08-31.xlsx]

## Sheet: Sheet
主要污染物及特征污染物名称		排放方式	排放口数量	分布情况	排放浓度和总量	超标情况	污染物排放标准	核定的排放总量
废气	烟尘	有组织排放	3	3	10.7mg/m³0.31t	无	80mg/m³	无
	二氧化硫				0mg/m³0t	无	400mg/m³	无
	氮氧化物				159mg/m³4.39t	无	400mg/m³	无
	苯		1	1	0mg/m³0t	无	1mg/m³	无
	甲苯				0.01mg/m³0.0015t	无	10mg/m³	无
	二甲苯				0.020mg/m³0.0015t	无	10mg/m³	无
	非甲烷总烃				0.033mg/m³2.097t	无	70mg/m³	无
废水	COD	间断排放	1	大连船舶重工三工场污水处理站	0mg/L0t	无	50mg/L	无
	氨氮				0.40mg/L0.00952t	无	10mg/L	无
	总磷				0.11mg/L0.0010t	无	0.5mg/L	无
