# Supplementary material
Source: ML conference proceedings conference paper supplement (https://openreview.net/forum?id=xg0fmtqh8d)
Supplement: supplementary_material [file 357_长飞光纤光缆:二零二四年第一季度报告.xlsx]

## Sheet: Sheet
股東名稱(全稱)	期末持股數量	比例(%)	持有有限售條件股份數量	質押或凍結情況		股東性質
				股份狀態	數量
中國華信郵電科技有限公司	179,827,794	23.73	0	無	0	國有法人
荷蘭德拉克通信科技有限公司	179,827,794	23.73	0	無	0	境外法人
香港中央結算 (代理人) 有限公司	171,614,849	22.64	0	無	0	境外法人
武漢長江通信產業集團股份有限公司	119,937,010	15.82	0	無	0	國有法人
寧波睿圖企業管理諮詢合夥企業 (有限合夥)	7,253,055	0.96	0	無	0	其他
華潤深國投信託有限公司－華潤信託•晟利5號單一資金信託	5,276,676	0.70	0	無	0	其他
香港中央結算有限公司	4,371,834	0.58	0	無	0	境外法人
寧波睿盈企業管理諮詢合夥企業 (有限合夥)	3,963,200	0.52	0	無	0	其他
上海甄投資產管理有限公司－甄投創鑫45號私募證券投資基金	2,565,345	0.34	0	無	0	其他
陝西省國際信託股份有限公司－陝國投•財富59號單一資金信託	2,066,466	0.27	0	無	0	其他
