# Supplementary material
Source: ML conference proceedings conference paper supplement (https://openreview.net/forum?id=xg0fmtqh8d)
Supplement: supplementary_material [file 358_绿色动力环保:2024年第一季度报告.xlsx]

## Sheet: Sheet
股東名稱	股東性質	持股數量	持股比例(%)	持有有限售條件股份數量	質押、標記或凍結情況
					股份狀態	數量
北京市國有資產經營有限責任公司	國有法人	594,085,618	42.63		無
HKSCC NOMINEES LIMITED	境外法人	379,460,000	27.23		未知
三峽資本控股有限責任公司	國有法人	84,265,896	6.05		無
北京國資 (香港) 有限公司	境外法人	24,859,792	1.78		無
北京惠泰恒瑞投資有限公司	境內非國有法人	16,990,707	1.22		無
創金合信基金-北京國有資本運營管理有限公司-創金合信京鑫區域優選單一資產管理計劃	其他	13,409,604	0.96		無
共青城景秀投資合夥企業	(有限合夥)境內非國有法人	7,130,378	0.51		無
南方基金穩健增值混合型養老金產品-招商銀行股份有限公司	其他	5,057,200	0.36		無
香港中央結算有限公司	境外法人	1,823,136	0.13		未知
招商銀行股份有限公司-南方中證1000交易型開放式指數證券投資基金	其他	1,781,200	0.13		無
