# Supplementary material
Source: ML conference proceedings conference paper supplement (https://openreview.net/forum?id=xg0fmtqh8d)
Supplement: supplementary_material [file 359_600482-中国动力-中国船舶重工集团动力股份有限公司2024年半年度报告_2024-08-31.xlsx]

## Sheet: Sheet
主要污染物及特征污染物名称		排放方式	排放口数量	分布情况	排放浓度和总量	超标情况	污染物排放标准	核定的排放总量
废气	铅烟尘	有组织排放	152	75	浓度:0.18mg/m³总量：0.112t	无	0.5mg/m³	0.57165t/a
	硫酸雾			63	浓度:2mg/m³	无	5mg/m³	/
	氮氧化物			14	浓度:32mg/m³总量:3.98t	无	50mg/m³	5.46t/a
	二氧化硫				浓度:3mg/m³总量：0.102t	无	10mg/m³	0.7t/a
废水	铅	间接排放	4	分别排入市政管网和雨水管网	浓度:0.2mg/L总量:0.02445t	无	0.5mg/L	0.331t/a
	COD				浓度:21.36mg/L总量:2.092t	无	150mg/L	115.22417t/a
	氨氮				浓度:1.5mg/L总量:0.1469t	无	30mg/L	22.89355t/a
