# Supplementary material
Source: ML conference proceedings conference paper supplement (https://openreview.net/forum?id=xg0fmtqh8d)
Supplement: supplementary_material [file 360_600482-中国动力-中国船舶重工集团动力股份有限公司2024年半年度报告_2024-08-31.xlsx]

## Sheet: Sheet
主要污染物及特征污染物名称		排放方式	排放口数量	分布情况	排放浓度和总量	超标情况	污染物排放标准	核定的排放总量
废气	颗粒物	有组织排放	31	30	浓度：7.85mg/m³总量：18.669t	无	30mg/m³（铸造）/120mg/m³（其它）	——
	二氧化硫			5	浓度：1.4mg/m³总量：0.245t	无	100mg/m³（兴舟的窑）150mg/m³（砂处理）200mg/m³（钢构的窑）	——
	氮氧化物			5	浓度：15.61mg/m³总量：3.016t	无	300mg/m³（兴舟的窑）电弧炉无限值240mg/m³（钢构窑）	——
	氯化氢			1	浓度：1.78mg/m³总量：0.04t	无	100mg/m³	——
	VOCS			9	浓度：8.51mg/m³总量：10.538t	无	120mg/m³	——
废水	总磷	间断排放	1	厂区排口入污水处理厂	浓度：0.12mg/L总量：0.004t	无	8mg/L	0.9864t/a
	COD				浓度：9.28mg/L总量：0.28t	无	500mg/L	37.43t/a
	氨氮				浓度：0.11mg/L总量：0.004t	无	45mg/L	0.19t/a
