# Supplementary material
Source: ML conference proceedings conference paper supplement (https://openreview.net/forum?id=xg0fmtqh8d)
Supplement: supplementary_material [file 361_600482-中国动力-中国船舶重工集团动力股份有限公司2024年半年度报告_2024-08-31.xlsx]

## Sheet: Sheet
主要污染物及特征污染物名称	排放方式	排放口数量	分布情况	排放浓度和总量	超标情况	污染物排放标准	核定的排放总量
颗粒物	有组织排放	6	1	浓度：1.0mg/m³总量：0.0006t/a	无	120mg/m³	暂无排放
VOCs				浓度：25.03mg/m³总量：0.0282t/a	无	120mg/m³	暂无排放
VOCs			1	浓度：30.38mg/m³总量：0.4132t/a	无	120mg/m³	暂无排放
氨	有组织排放		1	浓度：0.00039kg/h总量：0.0034t/a	无	4.9kg/h	暂无排放
硫化氢				浓度：0.000015mg/m³总量：0.0001t/a	无	0.33kg/h	暂无排放
VOCs			1	浓度：0.52mg/m³总量：0.006t/a	无	50mg/m³	暂无排放
VOCs			1	浓度：0.40mg/m³总量：1.25t/a	无	50mg/m³	暂无排放
SO2			1	浓度：29.4mg/m³总量：0.212t/a	无	50mg/m³	暂无排放
NOx				浓度：137mg/m³总量：0.992t/a	无	200mg/m³	暂无排放
颗粒物				浓度：17.6mg/m³总量：0.127t/a	无	20mg/m³	暂无排放
COD	经废水处理设备处理后排放	1	厂区排口排入禹王污水处理厂处理	浓度：134.2mg/L总量：1.23t/a	无	500mg/L	暂无排放
氨氮				浓度：8.5mg/L总量：0.078t/a	无	45mg/L	暂无排放
