# Supplementary material
Source: ML conference proceedings conference paper supplement (https://openreview.net/forum?id=xg0fmtqh8d)
Supplement: supplementary_material [file 362_浙商银行:二_二四年第一季度报告.xlsx]

## Sheet: Sheet
	2024年1-3月	2023年1-3月	本報告期比上年同期增(減)(%)
經營業績
營業收入	18,414	15,792	16.60
稅前利潤	7,638	7,131	7.11
歸屬於本行股東的淨利潤	5,913	5,625	5.12
經營活動使用的現金流量淨額	(90,099)	(38,022)	136.97
歸屬於本行股東的基本每股收益(人民幣元)1	0.22	0.25	(12.00)
歸屬於本行股東的稀釋每股收益(人民幣元)1	0.22	0.25	(12.00)
