# Supplementary material
Source: ML conference proceedings conference paper supplement (https://openreview.net/forum?id=xg0fmtqh8d)
Supplement: supplementary_material [file 363_000100-TCL科技-2024年半年度报告_2024-08-27.xlsx]

## Sheet: Sheet
	附注五	2024年6月30日	2024年1月1日
流动资产
货币资金	1	19,587,500	21,924,271
交易性金融资产	2	25,226,582	23,184,117
衍生金融资产	3	155,087	108,008
应收票据	4	199,917	615,392
应收账款	5	23,116,435	22,003,651
应收款项融资	6	618,962	954,410
预付款项	7	2,676,779	2,946,288
其他应收款	8	4,400,197	5,706,855
存货	9	20,181,927	18,481,755
合同资产	10	371,574	343,907
持有待售资产		-	162,416
一年内到期的非流动资产	11	599,083	580,695
其他流动资产	12	7,547,622	5,286,534
流动资产合计		104,681,665	102,298,299
非流动资产
债权投资	13	144,853	122,349
长期应收款	14	698,831	720,281
长期股权投资	15	24,908,240	25,431,271
其他权益工具投资	16	387,255	386,648
其他非流动金融资产	17	3,995,736	2,971,566
投资性房地产	18	813,380	911,679
固定资产	19	170,267,383	176,422,621
在建工程	20	20,126,696	17,000,052
使用权资产	21	6,064,032	6,386,446
无形资产	22	18,322,601	18,419,544
开发支出	23	2,180,888	2,541,493
商誉	24	10,516,742	10,516,742
长期待摊费用	25	2,355,213	3,402,689
递延所得税资产	26	2,372,450	2,246,222
其他非流动资产	27	14,497,575	13,081,184
非流动资产合计		277,651,875	280,560,787
资产总计		382,333,540	382,859,086
负债及股东权益
流动负债
短期借款	28	11,844,635	8,473,582
向中央银行借款	29	809,468	995,010
吸收存款及同业存放	30	366,470	270,929
交易性金融负债	31	208,434	251,451
衍生金融负债	32	80,185	58,591
应付票据	33	6,014,274	5,610,802
应付账款	34	28,415,307	29,402,493
预收款项	35	857	678
合同负债	36	1,465,572	1,899,468
应付职工薪酬	37	2,826,227	3,034,497
应交税费	38	897,148	861,342
其他应付款	39	22,206,210	22,171,402
一年内到期的非流动负债	40	27,177,946	24,631,659
其他流动负债	41	1,536,846	1,563,245
流动负债合计		103,849,579	99,225,149
非流动负债
长期借款	42	120,304,465	117,662,209
应付债券	43	8,627,636	9,113,848
租赁负债	44	5,699,585	5,737,288
长期应付款	45	2,577,466	2,739,444
长期应付职工薪酬	37	23,531	29,645
递延收益	46	1,567,859	1,540,648
递延所得税负债	26	1,257,440	1,427,487
预计负债	47	189,789	117,395
非流动负债合计		140,247,771	138,367,964
负债合计		244,097,350	237,593,113
股本	48	18,779,081	18,779,081
资本公积	49	10,349,364	10,752,055
减：库存股	50	919,322	1,094,943
其他综合收益	51	-767,601	-945,798
盈余公积	52	3,874,006	3,874,006
专项储备	53	15,003	11,343
一般风险准备	54	8,934	8,934
未分配利润	55	21,030,075	21,537,188
归属母公司股东权益合计		52,369,540	52,921,866
少数股东权益		85,866,650	92,344,107
股东权益合计		138,236,190	145,265,973
负债及股东权益总计		382,333,540	382,859,086
