# Supplementary material
Source: ML conference proceedings conference paper supplement (https://openreview.net/forum?id=xg0fmtqh8d)
Supplement: supplementary_material [file 364_600143-金发科技-金发科技2024年半年度报告_2024-08-27.xlsx]

## Sheet: Sheet
主要污染物及特征污染物的名称		排放方式	排放口数量	排放口分布	排放浓度废气：（mg/m3）废水：（mg/L，pH值为无量纲）	污染物排放执行标准值废气：（mg/m3）废水：（mg/L，pH值为无量纲）	年排放总量(吨)	报告期超标排放情况
废气	颗粒物	处理达标直接排放	6	厂房楼顶	0.5	20	/	无
	非甲烷总烃		7		3.05	40	/	无
	TRVOC				4.297	50	/	无
废水	pH值	达标排放	1	厂区西侧入口处	7.4	6-9	/	无
	氨氮				2.16	45	/	无
	化学需氧量				63	500	/	无
	可吸附有机卤化物				0.015	8.0	/	无
	石油类				0.73	15	/	无
	五日生化需氧量				22.48	300	/	无
	悬浮物				74	400	/	无
	总氮				8.81	70	/	无
	总磷				0.71	8	/	无
	总有机碳				15.1	150	/	无
