# Supplementary material
Source: ML conference proceedings conference paper supplement (https://openreview.net/forum?id=xg0fmtqh8d)
Supplement: supplementary_material [file 365_深中华B:2024年第一季度报告全文(英文版).xlsx]

## Sheet: Sheet
Total common shareholders at end of the Period		75,669	Total preferred shareholders with voting rights recovered at end of reporting period (if applicable)			0
Top ten shareholders（Excluding shares lent through refinancing)
Full name of Shareholders	Properties of shareholder	Share proporti on %	Quantity	Amount of tradable shares with Conditional held	Pledging or freezing
					Status of the shares	Quantity
Wansheng Industrial Holdings (Shenzhen) Co., Ltd.	Domestic non-state- owned legal person	20.00%	137,836,986	137,836,986	Not applicable	0
Shenzhen Guosheng Energy Investment Development Co., Ltd.	Domestic non-state- owned legal person	9.22%	63,508,747	0	Not applicable	0
UOB Kay Hian (Hong Kong) Limited[Note 1]	Foreign legal person	5.92%	40,817,329	0	Not applicable	0
Guosen Securities (HK) Brokerage Co., Ltd.	Foreign legal person	3.04%	20,983,693	0	Not applicable	0
Shenwan Hongyuan Securities (Hong Kong) Co., Ltd.	Foreign legal person	1.20%	8,281,156	0	Not applicable	0
China Merchants Securities (HK) Co., Ltd	Foreign legal person	0.77%	5,294,135	0	Not applicable	0
Li Huili	Domestic nature person	0.56%	3,891,124	0	Not applicable	0
Li Cheng	Domestic nature person	0.44%	3,000,084	0	Not applicable	0
Xu Hongbo	Domestic nature person	0.43%	2,988,619	0	Not applicable	0
Yang Yaochu	Domestic nature person	0.39%	2,665,686	0	Not applicable	0
Particular about top ten shareholders with un-restrict shares held
Shareholders’ name		Amount of un-restrict shares held at Period- end			Type of shares
					Type	Amount
Shenzhen Guosheng Energy Investment Development Co., Ltd.		63,508,747			RMB common shares	63,508,74 7
UOB Kay Hian (Hong Kong) Limited [Note 1		40,817,329			Domestica lly listed foreign shares	40,817,32 9
Guosen Securities (HK) Brokerage Co., Ltd.		20,983,693			Domestically listed foreign shares	20,983,693
Shenwan Hongyuan Securities (Hong Kong) Co., Ltd.		8,281,156			Domestically listed foreign shares	8,281,156
China Merchants Securities (HK) Co., Ltd		5,294,135			Domestically listed foreign shares	5,294,135
Li Huili		3,891,124			Domestically listed foreign shares	3,891,124
Li Cheng		3,000,084			Domestically listed foreign shares	3,000,084
Xu Hongbo		2,988,619			RMB common shares	2,988,619
Yang Yaochu		2,665,686			Domestically listed foreign shares	2,665,686
Shenzhen China Bicycle Company (Holdings) Co., Ltd. -Special account for property disposal of bankrupt enterprise		2,602,402			RMB common shares	1,383,313
					Domestically listed foreign shares	1,219,089
Explanation on associated relationship among the aforesaid shareholders			Li Huili, spouse of Ji Hanfei, the actual controller of Shenzhen Guosheng Energy Investment Development Co., Ltd., holding B-share of the Company on behalf of Shenzhen Guosheng Energy Investment Development Co., Ltd., other than that, the Company does not know whether the other outstanding shareholders are related and whether the shareholders belong to persons acting in concert regulated in the A…
Explanation on top 10 shareholders involving margin business (if any) (see note 4)			N/A
Note 1: UOB Kay Hian (Hong Kong) Limited is licensed under the Securities and Futures Ordinance of Hong Kong to provide securities brokerage services to retail and institutional clients. Its main business is Hong Kong stock brokerage, and it also provides securities brokerage and services in various overseas markets. According to the email sent from UOB Kay Hian (Hong Kong) Limited, as of March 3…
