# Supplementary material
Source: ML conference proceedings conference paper supplement (https://openreview.net/forum?id=xg0fmtqh8d)
Supplement: supplementary_material [file 366_张裕B:2024年半年度报告(英文版).xlsx]

## Sheet: Sheet
Item	Ending balance	Beginning balance
Refund payable		24,869,246
Unamortized VAT amount	18,001,307	20,089,051
Total	18,001,307	44,958,297
