# Supplementary material
Source: ML conference proceedings conference paper supplement (https://openreview.net/forum?id=xg0fmtqh8d)
Supplement: supplementary_material [file 367_药明康德:中期报告2024.xlsx]

## Sheet: Sheet
	歸屬期	歸屬比例
首個歸屬期	本集團相關成員公司僱用2021年選定參與者後一週年屆滿之日起一年內	0%
第二個歸屬期	本集團相關成員公司僱用2021年選定參與者後兩週年屆滿之日起一年內	25%
第三個歸屬期	本集團相關成員公司僱用2021年選定參與者後三週年屆滿之日起一年內	25%
第四個歸屬期	本集團相關成員公司僱用2021年選定參與者後四週年屆滿之日起一年內	50%
