# Supplementary material
Source: ML conference proceedings conference paper supplement (https://openreview.net/forum?id=xg0fmtqh8d)
Supplement: supplementary_material [file 368_东阳光长江药业:中期报告2024.xlsx]

## Sheet: Sheet
		Hepatitis C Drugs 丙肝藥物		Other Drugs 其他藥物			Total
		Patent	Capitalised development costs	Generic drug intellectual property rights	Insulin intellectual property rights	Capitalised development costs
		專利	資本化開發支出	仿製藥知識產權	胰島素知識產權	資本化開發支出	總計
		RMB’000	RMB’000	RMB’000	RMB’000	RMB’000	RMB’000
		人民幣千元	人民幣千元	人民幣千元	人民幣千元	人民幣千元	人民幣千元
Cost:	成本:
At 1 January 2023	於二零二三年一月一日	848,021	174,512	1,490,138	261,069	986,350	3,760,090
Addition through internal development	透過內部開發新增	–	–	–	–	204,908	204,908
Addition and transfer from prepayments	預付款項新增及轉撥	–	–	144,978	–	–	144,978
Transfer from development costs to	開發支出轉撥專利
patents		–	–	–	95,861	(95,861)	–
Abandonment	棄置	–	(174,512)	–	–	–	(174,512)
At 31 December 2023	於二零二三年十二月三十一日	848,021	–	1,635,116	356,930	1,095,397	3,935,464
Addition through internal development	透過內部開發新增	–	–	–	–	92,547	92,547
At 30 June 2024	於二零二四年六月三十日	848,021	–	1,635,116	356,930	1,187,944	4,028,011
Accumulated amortisation:	累計攤銷:
At 1 January 2023	於二零二三年一月一日	(237,263)	–	(336,573)	(26,681)	–	(600,517)
Charge for the year	年內扣除	(62,465)	–	(127,746)	(29,302)	–	(219,513)
At 31 December 2023	於二零二三年十二月三十一日	(299,728)	–	(464,319)	(55,983)	–	(820,030)
Charge for the period	期內扣除	(20,250)	–	(56,210)	(17,847)	–	(94,307)
At 30 June 2024	於二零二四年六月三十日	(319,978)	–	(520,529)	(73,830)	–	(914,337)
Impairment loss:	減值虧損:
At 1 January 2023 in the year	於二零二三年一月一日	(20,399)	(22,599)	(195,929)	–	–	(238,927)
	年內確認	(139,753)	(151,913)	(193,727)	–	–	(485,393)
Recognised Written-off	撇銷	–	174,512	–	–	–	174,512
At 31 December 2023	於二零二三年十二月三十一日	(160,152)	–	(389,656)	–	–	(549,808)
Recognised in the period	期內確認	–	–	(2,386)	–	–	(2,386)
At 30 June 2024	於二零二四年六月三十日	(160,152)	–	(392,042)	–	–	(552,194)
Net book value:	賬面淨值:
At 30 June 2024	於二零二四年六月三十日	367,891	–	722,545	283,100	1,187,944	2,561,480
At 31 December 2023	於二零二三年十二月三十一日	388,141	–	781,141	300,947	1,095,397	2,565,626
