# Supplementary material
Source: ML conference proceedings conference paper supplement (https://openreview.net/forum?id=xg0fmtqh8d)
Supplement: supplementary_material [file 369_600031-三一重工_三一重工股份有限公司2024年第一季度报告_2024-04-29.xlsx]

## Sheet: Sheet
项目	2024年3月31日	2023年12月31日
流动资产：
货币资金	20,086,198	18,071,827
结算备付金
拆出资金	221,457	303,286
交易性金融资产	11,128,123	10,848,936
衍生金融资产	324,599	334,063
应收票据	374,856	306,049
应收账款	25,328,305	24,164,729
应收款项融资	303,730	365,819
预付款项	751,979	751,869
应收保费
应收分保账款
应收分保合同准备金
其他应收款	3,017,759	3,010,898
其中：应收利息
应收股利		270
买入返售金融资产
存货	20,893,232	19,767,762
其中：数据资源
合同资产	78,440	67,102
持有待售资产
一年内到期的非流动资产	11,244,028	12,004,314
其他流动资产	8,314,561	7,636,657
流动资产合计	102,067,267	97,633,311
非流动资产：
发放贷款和垫款	2,554,549	3,038,115
债权投资
其他债权投资
长期应收款	12,112,675	12,535,520
长期股权投资	2,350,817	2,400,912
其他权益工具投资	1,013,709	970,897
其他非流动金融资产	309,580	310,913
投资性房地产	135,886	139,416
固定资产	23,088,281	23,453,240
在建工程	1,562,260	1,366,933
生产性生物资产
油气资产
使用权资产	753,932	779,841
无形资产	4,785,539	4,832,179
其中：数据资源
开发支出	245,430	288,567
其中：数据资源
商誉	48,757	49,661
长期待摊费用	182,757	183,981
递延所得税资产	3,217,042	3,070,315
其他非流动资产	140,598	148,519
非流动资产合计	52,501,812	53,569,009
资产总计	154,569,079	151,202,320
流动负债：
短期借款	3,811,977	4,115,624
向中央银行借款
拆入资金	6,454,259	5,435,397
交易性金融负债
衍生金融负债	76,763	237,420
应付票据	5,673,621	5,074,985
应付账款	18,888,423	17,617,741
预收款项
合同负债	2,174,672	2,177,672
卖出回购金融资产款
吸收存款及同业存放
代理买卖证券款
代理承销证券款
应付职工薪酬	2,389,674	3,017,925
应交税费	1,202,854	1,062,505
其他应付款	10,349,774	10,862,339
其中：应付利息
应付股利	113,986	113,986
应付手续费及佣金
应付分保账款
持有待售负债
一年内到期的非流动负债	1,634,938	1,821,450
其他流动负债	5,345,154	2,991,998
流动负债合计	58,002,109	54,415,056
非流动负债：
保险合同准备金
长期借款	21,809,481	23,555,728
应付债券
其中：优先股
永续债
租赁负债	542,398	550,576
长期应付款	14,299	15,415
长期应付职工薪酬	72,529	69,515
预计负债	186,184	203,138
递延收益	2,413,228	2,387,473
递延所得税负债	869,302	825,349
其他非流动负债	7,068	7,117
非流动负债合计	25,914,489	27,614,311
负债合计	83,916,598	82,029,367
所有者权益（或股东权益）：
实收资本（或股本）	8,485,740	8,485,740
其他权益工具
其中：优先股
永续债
资本公积	5,277,682	5,250,041
减：库存股	215,654	215,654
其他综合收益	-1,736,027	-1,583,325
专项储备
盈余公积	3,963,424	3,963,424
一般风险准备	59,244	59,244
未分配利润	53,660,568	52,080,467
归属于母公司所有者权益（或股东权益）合计	69,494,977	68,039,937
少数股东权益	1,157,504	1,133,016
所有者权益（或股东权益）合计	70,652,481	69,172,953
负债和所有者权益（或股东权益）总计	154,569,079	151,202,320
