# Supplementary material
Source: ML conference proceedings conference paper supplement (https://openreview.net/forum?id=xg0fmtqh8d)
Supplement: supplementary_material [file 370_600482-中国动力-中国船舶重工集团动力股份有限公司2024年半年度报告_2024-08-31.xlsx]

## Sheet: Sheet
主要污染物及特征污染物名称		排放方式	排放口数量	分布情况	排放浓度和总量	超标情况	污染物排放标准	核定的排放总量
废气	颗粒物	有组织排放	4	1	浓度：0mg/m³(产污设备停用)	无	30mg/m³	0.0036t/a
	氮氧化物			1	浓度：3.9mg/m³总量：——	无	200mg/m³	0.099t/a
	氨气			2	浓度：11.8mg/m³总量：——	无	4.9kg/h	0.06t/a
废水	总银	间断排放	1	含银废水处理系统三效蒸发排放口	浓度：0.05mg/L总量：----	无	0.5mg/L	/
	COD				浓度：21mg/L总量：----	无	200mg/L	/
	氨氮	间断排放	1	总排放口	浓度：1.38mg/L总量：0.028t/a	无	45mg/L	0.0951t/a
	COD				浓度：260mg/L总量：0.90t/a		500mg/L	0.9505t/a
