# Supplementary material
Source: ML conference proceedings conference paper supplement (https://openreview.net/forum?id=xg0fmtqh8d)
Supplement: supplementary_material [file 371_002230-科大讯飞-2024年半年度报告_2024-08-22.xlsx]

## Sheet: Sheet
项目名称	关联方	期末账面余额	期初账面余额
应付账款	安徽淘云科技股份有限公司及其下属子公司	12,805,745.53	10,298,773.18
应付账款	中国移动通信有限公司及其下属子公司	29,949,499.41	41,536,990.48
应付账款	科讯嘉联信息技术有限公司及其下属子公司	4,240,582.89	8,219,794.73
应付账款	合肥智能语音创新发展有限公司及其下属子公司	22,712,130.79	9,995,141.84
应付账款	安徽言知科技有限公司及其下属子公司	86,395,729.60	33,831,523.15
应付账款	沈阳美行科技股份有限公司	2,371,365.65
应付账款	羚羊工业互联网股份有限公司	20,633,726.37	19,623,297.51
应付账款	星河智联汽车科技有限公司	0.00	4,635,772.63
应付账款	北京京师讯飞教育科技有限公司	4,368,189.09	1,968,991.66
应付账款	安徽艾德未来智能科技有限公司	35,985,812.57	12,506,141.95
应付账款	安徽省科普产品工程研究中心有限责任公司	349,090.91	500,418.20
应付账款	讯飞清环（苏州）科技有限公司	12,308,171.31	14,184,367.93
应付账款	南京谦萃智能科技服务有限公司	134,512.40	10,977,664.03
应付账款	安徽讯飞至悦科技有限公司	527,511.65	1,484,798.57
应付账款	安徽科讯智泊科技有限公司	1,559,262.99	786,278.99
应付账款	安徽讯飞联创信息科技有限公司	1,870,187.92	396,607.92
应付账款	广东爱因智能科技有限公司	1,945,352.98	2,105,580.15
应付账款	宣城城讯信息科技有限公司	126,367.92
应付账款	苏州数智科技产业发展有限公司	0.00	1,470,274.53
应付账款	中国科学技术大学及其下属子公司	59,300.97	23,300.97
应付账款	合肥飞尔智能科技有限公司	626,981.21	270,811.40
应付账款	合肥量圳建筑科技有限公司	401,928.03
应付账款	北京灵隆科技有限公司	117,242.00	117,242.00
其他应付款	中国移动通信有限公司及其下属子公司	72,010.00	100,986.50
其他应付款	中国科学技术大学及其下属子公司	1,539,699.00	3,139,699.00
其他应付款	安徽科讯智泊科技有限公司	100,000.00	100,000.00
其他应付款	北京京师讯飞教育科技有限公司	50,000.00	50,000.00
其他应付款	科讯嘉联信息技术有限公司及其下属子公司	95,000.00	95,000.00
其他应付款	安徽科讯睿见科技有限公司	34,980,000.00	34,980,000.00
其他应付款	安徽言知科技有限公司及其下属子公司	2,400,000.00
其他应付款	沈阳美行科技股份有限公司	50,000.00	50,000.00
其他应付款	合肥飞尔智能科技有限公司	50,000.00
其他应付款	南京谦萃智能科技服务有限公司		113,500.00
其他应付款	合肥智能语音创新发展有限公司及其下属子公司		2,005,896.52
合同负债	京师悦读（北京）科技有限公司	566,336.70
合同负债	中国移动通信有限公司及其下属子公司	10,864,296.69	8,629,529.45
合同负债	中国科学技术大学及其下属子公司	2,306,846.82	1,094,799.48
合同负债	科讯嘉联信息技术有限公司及其下属子公司	151,531.68
合同负债	羚羊工业互联网股份有限公司	5,277.26
合同负债	合肥智能语音创新发展有限公司及其下属子公司	0.01	20,784.28
合同负债	合肥量圳建筑科技有限公司	0.01
合同负债	星河智联汽车科技有限公司	575.23	575.23
合同负债	安徽淘云科技股份有限公司及其下属子公司	98,316.42	2,621.83
合同负债	合肥飞尔智能科技有限公司	16,238.53
合同负债	南京谦萃智能科技服务有限公司	1,484,758.26
合同负债	安徽艾德未来智能科技有限公司	252,566.87	156,420.37
合同负债	科大硅谷服务平台（安徽）有限公司	8,988.99
合同负债	浙江声谷科技有限公司	16,880.73
合同负债	北京京师讯飞教育科技有限公司	0.00	121,671.89
合同负债	安徽讯飞联创信息科技有限公司	3,761.47	3,761.47
