# Supplementary material
Source: ML conference proceedings conference paper supplement (https://openreview.net/forum?id=xg0fmtqh8d)
Supplement: supplementary_material [file 372_万科企业:2024年第一季度报告.xlsx]

## Sheet: Sheet
項目	2024年1-3月	2023年1-3月	變動幅度	說明
短期銀行貸款及金融機構借款	58,141,652	43,572,666	33.44%	一年內到期的長期借款增長
其他收益淨額	2,256,709	1,438,573	56.87%	处置部分投資影响
其他經營開支	(287,129)	(172,247)	66.70%	應收款項信用減值增加
應佔聯營公司及合營公司利潤減虧損	(524,829)	145,946	-459.60%	權益法確認的投資收益减少
所得稅	(2,334,348)	(3,424,243)		應稅利潤减少
