# Supplementary material
Source: ML conference proceedings conference paper supplement (https://openreview.net/forum?id=xg0fmtqh8d)
Supplement: supplementary_material [file 373_002758-浙农股份-2024年半年度报告_2024-08-29.xlsx]

## Sheet: Sheet
承诺投资项目和超募资金投向	是否已变更项目(含部分变更)	募集资金承诺投资总额	调整后投资总额(1)	本报告期投入金额	截至期末累计投入金额(2)	截至期末投资进度(3)＝(2)/(1)	项目达到预定可使用状态日期	本报告期实现的效益	是否达到预计效益	项目可行性是否发生重大变化
承诺投资项目
医药物流二期建设项目	是	12,024.52	12,024.52	0	11,636.41	96.77%		已结项	已结项	否，已结项
连锁药店扩展项目	是	6,073.16	1,660.76	0	1,660.76	注1				是，已变更
医药批发业务扩展项目	否	4,000	4,000	0	3,998.17	99.95%		已结项	已结项	否，已结项
数字化系统升级建设项目	否		4,412.4	318.47	1,795.74	40.70%		注2	不适用	否
年产10000吨中药饮片扩建项目	是	16,413.55	16,413.55	1,421.96	9,477.85	57.74%		已终止	已终止	是，已终止
技术研发中心项目	是	5,338.96	5,338.96	1,071.05	5,287.18	99.03%		已结项	已结项	否，已结项
承诺投资项目小计	--	43,850.19	43,850.19	2,811.48	33,856.11	--	--	0	--	--
超募资金投向
无		0	0	0	0	0.00%
合计	--	43,850.19	43,850.19	2,811.48	33,856.11	--	--	0	--	--
分项目说明未达到计划进度、预计收益的情况和原因（含“是否达到预计效益”选择“不适用”的原因）	医药物流二期项目：2022 年 1 月 10 日，经公司 2022 年第一次临时股东大会审议，项目已结项并将节余募集资金永久补充流动资金。 连锁药店扩展项目：2022 年 1 月 10 日，经公司 2022 年第一次临时股东大会审议，项目已变更用于数字化系统升级建设项目。 数字化系统升级建设项目：该项目的实施，有利于公司提高管理和经营效率、优化资源配置，有利于公司长期战略发展，有利于提高募集资金的使用效率，促进公司持续健康发展，不直接产生营业收入，无法单独核算效益。
项目可行性发生重大变化的情况说明	原募投项目“连锁药店扩展项目”是公司于 IPO 期间根据当时的市场环境、行业发展趋势及公司实际情况等因素制定的。随着医药市场的不断开放和国家政策的变化，原项目继续实施的难度较大；另一方面，公司于2020 年完成了重大资产重组事项，经营规模大幅提升，需要更加高效的管理系统支持跨地区、跨品类的业务资源整合和内控管理工作。新项目“数字化系统升级建设项目”是在公司自身较为扎实的数字化建设基础上展开，对已有 ERP 系统进行升级，并新增财务、业务、人事、物流、智慧农资等方面的信息化系统平台和模块，打造面向员工、客户、供应商的统一移动门户。该项目将能提升公司经营效率、管控能力和信息化应用水平。同时，新项目也符合公司农业综合服务“上抓资源建设，下接终端网络，科技集成服务，数字管理赋能”的发展战略。 受经济及行业政策因素的影响，公司当前的中药饮片业务发展受到了一定限制，公司终止“年产 10000 吨中药…
超募资金的金额、用途及使用进展情况	不适用
募集资金投资项目实施地点变更情况	适用
	以前年度发生
	2022 年 1月 10日，公司 2022 年第一次临时股东大会审议通过了《关于公司部分募投项目延期的议案》，同意公司将公开发行可转换公司债券募集资金投资项目延期至 2023 年 12月 31 日完成。同时审议通过了《关于公司部分募投项目结项并将节余募集资金永久补充流动资金及变更部分募集资金用途的议案》，同意公司将“医药物流二期建设项目”和“医药批发业务扩展项目”募投项目结项并将节余募集资金永久补充流动资金，同时变更“连锁药店扩展项目”的募集资金用途，用于公司“数字化系统升级建设项目”。
募集资金投资项目实施方式调整情况	适用
	以前年度发生
	2022 年 1月 10日，公司 2022 年第一次临时股东大会审议通过了《关于公司部分募投项目延期的议案》，同意公司将公开发行可转换公司债券募集资金投资项目延期至 2023 年 12月 31 日完成。同时审议通过了《关于公司部分募投项目结项并将节余募集资金永久补充流动资金及变更部分募集资金用途的议案》，同意公司将“医药物流二期建设项目”和“医药批发业务扩展项目”募投项目结项并将节余募集资金永久补充流动资金，同时变更“连锁药店扩展项目”的募集资金用途，用于公司“数字化系统升级建设项目”。
募集资金投资项目先期投入及置换情况	不适用
用闲置募集资金暂时补充流动资金情况	不适用
项目实施出现募集资金结余的金额及原因	适用
	1、首次公开发行：医药物流二期建设项目、医药批发业务扩展项目投资进度已达 96%以上，相关投资计划已完成，经 2022 年第一次临时股东大会审议将用于永久补充流动资金。 2、公开发行可转换公司债券：“技术研发中心项目”已完成实施进度并达到预定可使用状态，相关投资计划已完成；受经济及行业政策因素影响，公司当前的中药饮片业务发展受到了一定限制，公司终止“年产 10000吨中药饮片扩建项目”。经 2023 年年度股东大会审议将用于永久补充流动资金。
尚未使用的募集资金用途及去向	1、首次公开发行：截至 2024 年 6月 30日，公司尚未使用的募集资金以活期存款方式存放在募集资金专户，用于募投项目的实施。 2、公开发行可转换公司债券：截至 2024年 6月 30日，公司剩余募集资金存放在募集资金专户，用于支付募投项目的待支付合同金额。合同款项全部支付完毕后，公司将转出剩余款项，及时注销对应募集资金专户。
募集资金使用及披露中存在的问题或其他情况	无
