# Supplementary material
Source: ML conference proceedings conference paper supplement (https://openreview.net/forum?id=xg0fmtqh8d)
Supplement: supplementary_material [file 374_600482-中国动力-中国船舶重工集团动力股份有限公司2024年半年度报告_2024-08-31.xlsx]

## Sheet: Sheet
主要污染物及特征污染物名称		排放 方式	排放口 数量	分布 情况	排放浓度和总量	超标 情况	污染物排 放标准	核定的排 放总量
废气	铅烟尘	有组织排放	38	17	浓度：0.115mg/m³总量：0.0558t	无	0.5mg/m³	0.476t/a
	硫酸雾			18	浓度：0.20mg/m³	无	5mg/m³	/
	氮氧化物			3	浓度：26mg/m³总量：0.3956t	无	50mg/m³	6.9291t/a
	二氧化硫				浓度：低于检出限	无	10mg/m³	/
废水	铅	间断排放	1	厂区排口入清苑区污水处理厂	浓度：0.187mg/L总量：0.0066t	无	0.5mg/L	0.0401t/a
	COD				浓度：26.077mg/L总量：0.706t	无	150mg/L	8.817t/a
	氨氮				浓度：6.421mg/L总量：0.194t	无	30mg/L	0.359t/a
