# Supplementary material
Source: ML conference proceedings conference paper supplement (https://openreview.net/forum?id=xg0fmtqh8d)
Supplement: supplementary_material [file 375_600482-中国动力-中国船舶重工集团动力股份有限公司2024年半年度报告_2024-08-31.xlsx]

## Sheet: Sheet
主要污染物及特征污染物名称		排放方式	排放口数量	分布情况	排放浓度和总量	超标情况	污染物排放标准	核定的排放总量
废气	二氧化硫	有组织排放	19	1	浓度：3mg/m³总量：0.093t/a	无	200mg/m³	/
	氮氧化物			2	浓度：51mg/m³总量：0.501t/a	无	300mg/m³	/
	颗粒物			16	浓度：5.06mg/m³总量：0.99t/a	无	120mg/m³	/
废水	COD	间断排放	1	厂内综合污水处理站	浓度：77mg/L总量：2.939t/a	无	500mg/L	/
	氨氮				浓度：7.83mg/L总量：0.147t/a	无	45mg/L	/
