# Supplementary material
Source: ML conference proceedings conference paper supplement (https://openreview.net/forum?id=xg0fmtqh8d)
Supplement: supplementary_material [file 377_600482-中国动力-中国船舶重工集团动力股份有限公司2024年半年度报告_2024-08-31.xlsx]

## Sheet: Sheet
主要污染物及特征污染物名称		排放方式	排放口数量	分布情况	排放浓度和总量	超标情况	污染物排放标准	核定的排放总量
废气	铅烟尘	有组织排放	23	12	浓度：0.173mg/m³总量：0.10877t	无	0.5mg/m³	0.61377t/a
	硫酸雾			11	浓度：0.08mg/m³	无	5mg/m³	/
废水	铅	间断排放	1	厂区排口入大王店产业园区污水处理厂	浓度：0.125mg/L总量：0.0109t	无	0.5mg/L	0.051028t/a
	COD				浓度：12.523mg/L总量：1.0704t	无	150mg/L	10.173t/a
	氨氮				浓度：5.759mg/L总量：0.472t	无	30mg/L	0.986t/a
