# Supplementary material
Source: ML conference proceedings conference paper supplement (https://openreview.net/forum?id=xg0fmtqh8d)
Supplement: supplementary_material [file 378_招港B:2024年半年度报告(英文版).xlsx]

## Sheet: Sheet
Item	30/06/2024	31/12/2023	Reason for outstanding	Impaired or not and the determination basis
Wharf Holdings Hong Kong	147,680,363.88	147,680,363.88	In processing and expected to be recovered in 2024	No
Total	147,680,363.88	147,680,363.88
