# Supplementary material
Source: ML conference proceedings conference paper supplement (https://openreview.net/forum?id=xg0fmtqh8d)
Supplement: supplementary_material [file 379_顺丰控股:2024年半年度报告(英文版).xlsx]

## Sheet: Sheet
	31 December 2023	Increase in the current period	Amortisation in the current period	Other decreases in the current period	30 June 2024
Improvements to right-of-use assets	2,141,678	553,443	(535,193)	(40,816)	2,119,112
Settling-in allowance and introduction fee for pilots	805，415	21,880	(53,109)	-	774,186
Others	214,311	30,608	(24,528)	(3,801)	216,590
	3,161,404	605,931	(612,830)	(44,617)	3,109,888
