# Supplementary material
Source: ML conference proceedings conference paper supplement (https://openreview.net/forum?id=xg0fmtqh8d)
Supplement: supplementary_material [file 380_中鲁B:2024年半年度报告(英文版).xlsx]

## Sheet: Sheet
Item	Long range fishing	Vessel leasing	Seafood refrigeration processing trade	Others	Inter-segment offset	Total
Income from main business	262,545,799.79	69,127,593.84	188,736,731.52	226,334.09	-41,279,242.20	479,357,217.04
Main business cost	282,732,706.25	53,473,058.76	177,242,719.29	168,663.26	-41,279,242.20	472,337,905.36
Credit impairment loss	6,522.33	-26,700.93	-875,239.27			-895,417.87
Asset impairment loss			-1,043,419.52			-1,043,419.52
Depreciation costs and amortization costs	26,381,545.84	8,213,257.55	3,692,780.30	2,161,015.32		40,448,599.01
Total profit	-36,926,015.00	13,184,744.47	4,408,554.70	-11,262,355.16	1,708,000.00	-28,887,070.99
Income tax expenses		222,334.89	881,429.26			1,103,764.15
Net profit	-36,926,015.00	12,962,409.58	3,527,125.44	-11,262,355.16	1,708,000.00	-29,990,835.14
Total assets	1,134,464,544. 91	362,419,221.80	652,875,502.02	555,542,057.80	- 687,009,307.00	2,018,292,019. 53
Total liabilities	262,545,799.79	69,127,593.84	188,736,731.52	226,334.09	-41,279,242.20	479,357,217.04
