# Supplementary material
Source: ML conference proceedings conference paper supplement (https://openreview.net/forum?id=xg0fmtqh8d)
Supplement: supplementary_material [file 381_600383-金地集团_2024年第一季度报告_2024-04-30.xlsx]

## Sheet: Sheet
经营业态	地区	出租物业数量	出租房地产的建筑面积	可出租面积	1-3月累计租金收入	出租率(%)	租金收入/房地产公允价值(%)
写字楼、商业	北京	3	221,670	199,089	13,116	75	1.2
	深圳	3	718,017	678,765	32,351
	上海	4	199,891	162,210	6,029
	杭州	2	108,814	76,273	1,419
	广州	1	25,785	9,372	392
	南京	2	143,907	77,053	2,850
	西安	1	68,885	43,137	2,914
	武汉	1	69,057	40,008	1,672
	昆明	1	30,593	19,010	500
	淮安	1	37,273	23,495	263
产业	深圳	1	86,157	86,157	925	79	1.6
	上海	9	922,551	896,229	11,011
	成都	3	174,049	171,251	950
	苏州	1	123,435	114,800	1,109
	广州	1	98,354	98,354	796
