# Supplementary material
Source: ML conference proceedings conference paper supplement (https://openreview.net/forum?id=xg0fmtqh8d)
Supplement: supplementary_material [file 382_海康威视:2024年半年度报告(英文版).xlsx]

## Sheet: Sheet
Lessor	Type of leased assets	Rental fee confirmed in the first half of 2024	Rental fee confirmed in the first half of 2023
Subsidiaries of CETC	Equipment	-	6,764,242.38
Subsidiaries of CETC	House	1,670,579.23	1,076,516.38
Total		1,670,579.23	7,840,758.76
