# Supplementary material
Source: ML conference proceedings conference paper supplement (https://openreview.net/forum?id=xg0fmtqh8d)
Supplement: supplementary_material [file 383_上海电气:2024年中期报告.xlsx]

## Sheet: Sheet
	銷售商品			工程建造			勞務人民幣千元	其他人民幣千元	合計人民幣千元
	中國地區人民幣千元	其他亞洲國家和地區人民幣千元	其他地區人民幣千元	中國地區人民幣千元	其他亞洲國家和地區人民幣千元	其他地區人民幣千元
主營業務收入	33,278,328	556,205	4,119,211	1,786,045	1,151,699	330,145	5,371,869	-	46,593,502
其中:在某一時點確認	33,278,328	556205	4,119,211	-	-	-	40,261	-	37,994,005
在某一時段內確認	-	-	-	1,786,045	1,151,699	330,145	5,331,608	-	8,599,497
其他業務收入	736,747	28,632	1,600,567	-	-	-	7,937	586,949	2,960,832
	34,015,075	584,837	5,719,778	1,786,045	1,151,699	330,145	5,379,806	586,949	49,554,334
