# Supplementary material
Source: ML conference proceedings conference paper supplement (https://openreview.net/forum?id=xg0fmtqh8d)
Supplement: supplementary_material [file 384_中国中车:2024年第一季度报告.xlsx]

## Sheet: Sheet
	營業收入
分業務	2024年1-3月	上年同期	增減額	增減幅
鐵路裝備	13,316,952	8,640,972	4,675,980	54.11%
城軌與城市基礎設施	5,531,445	7,310,158	-1,778,713	-24.33%
新產業	12,182,861	15,100,401	-2,917,540	-19.32%
現代服務	1,151,535	1,327,127	-175,592	-13.23%
合計	32,182,793	32,378,659	-195,866	-0.60%
