# Supplementary material
Source: ML conference proceedings conference paper supplement (https://openreview.net/forum?id=xg0fmtqh8d)
Supplement: supplementary_material [file 385_恒大物业:2024中期报告.xlsx]

## Sheet: Sheet
	股份溢價人民幣千元	法定儲備人民幣千元	資本儲備人民幣千元	匯兌儲備人民幣千元	總計人民幣千元
截至2024年6月30日止六個月
於2024年1月1日的結餘(經審核)	5,944,185	727,894	(12,757,250)	2,774	(6,082,397)
外幣換算差額	–	–	–	(138)	(138)
於2024年6月30日的結餘 (未經審核)	5,944,185	727,894	(12,757,250)	2,636	(6,082,535)
截至2023年6月30日止六個月
於2023年1月1日的結餘（經審核）	5,944,185	504,384	(12,756,202)	2,256	(6,305,377)
其他	–	–	(1,048)	–	(1,048)
外幣換算差額	–	–	–	1,635	1,635
於2023年6月30日的結餘（未經審核）	5,944,185	504,384	(12,757,250)	3,891	(6,304,790)
