# Supplementary material
Source: ML conference proceedings conference paper supplement (https://openreview.net/forum?id=xg0fmtqh8d)
Supplement: supplementary_material [file 386_600482-中国动力-中国船舶重工集团动力股份有限公司2024年半年度报告_2024-08-31.xlsx]

## Sheet: Sheet
主要污染物及特征污染物名称		排放方式	排放口数量	分布情况	排放浓度和总量	超标情况	污染物排放标准	核定的排放总量
废气	铅烟尘	有组织排放	43	18	浓度：0.092mg/m³总量：0.01158t	无	0.5mg/m³	0.06t/a
	硫酸雾			25	浓度：0.828mg/m³	无	5mg/m³	/
废水	铅	间接排放	1	回用	浓度：0.093mg/L总量：0t	无	0.5mg/L	0.012t/a
	COD				浓度：32.395mg/L总量：0t	无	150mg/L	6.32t/a
	氨氮				浓度：0.428mg/L总量：0t	无	30mg/L	1.44t/a
