# Supplementary material
Source: ML conference proceedings conference paper supplement (https://openreview.net/forum?id=xg0fmtqh8d)
Supplement: supplementary_material [file 387_煜盛文化:2024中期报告.xlsx]

## Sheet: Sheet
姓名	身份╱權益性質	股份數目	好倉╱淡倉	佔本公司的股權概約百分比(%)
劉牧先生(1)	受控法團權益	457,648,739	好倉	28.60%
常星女士(2)	配偶權益	457,648,739	好倉	28.60%
Double K Limited(1)	實益擁有人	456,750,961	好倉	28.55%
Eastern Pearl Capital Fund SPC-Eastern Pearl Caelus Fund SP	實益擁有人	231,301,933	好倉	14.46%
Memory Ocean Technology Limited	受控法團權益	175,636,000	好倉	10.98%
ZHANG Jizhen	受控法團權益	175,636,000	好倉	10.98%
劉央女士(3)	受控法團權益	158,120,000	好倉	9.88%
Atlantis Capital Group Holdings Limited(3)	受控法團權益	158,120,000	好倉	9.88%
OBOR Stable Growth Fund Limited(3)	實益擁有人	113,501,000	好倉	7.09%
Star Fortune Investment Holdings Ltd.(4)	受控法團權益	106,752,945	好倉	6.67%
China Zenith Limited(4)	受控法團權益	106,752,945	好倉	6.67%
劉傳軍先生(4)	受控法團權益	106,752,945	好倉	6.67%
