# Supplementary material
Source: ML conference proceedings conference paper supplement (https://openreview.net/forum?id=xg0fmtqh8d)
Supplement: supplementary_material [file 388_中国南方航空股份:2024年第一季度报告.xlsx]

## Sheet: Sheet
項目名稱	變動比例(%)	主要原因
營業收入	30.97	本報告期與去年同期相比，航空客運市場進一步恢復，客運收入增加。
歸屬於上市公司股東的淨利潤	不適用	本報告期與去年同期相比，航空客運市場進一步恢復，客運收入增加，利潤減虧增盈。
歸屬於上市公司股東的扣除非經常性損益的淨利潤	不適用	本報告期與去年同期相比，航空客運市場進一步恢復，客運收入增加，利潤減虧增盈。
基本每股收益	不適用	本報告期與去年同期相比，航空客運市場進一步恢復，客運收入增加，利潤減虧增盈。
稀釋每股收益	不適用	本報告期與去年同期相比，航空客運市場進一步恢復，客運收入增加，利潤減虧增盈。
加權平均淨資產收益率	增加5.21個百分點	本報告期與去年同期相比，航空客運市場進一步恢復，客運收入增加，利潤減虧增盈。
