# Supplementary material
Source: ML conference proceedings conference paper supplement (https://openreview.net/forum?id=xg0fmtqh8d)
Supplement: supplementary_material [file 390_600482-中国动力-中国船舶重工集团动力股份有限公司2024年半年度报告_2024-08-31.xlsx]

## Sheet: Sheet
主要污染物及特征污染物名称		排放方式	主要排放口数量	分布情况	排放浓度及总量	超标情况	污染物排放标准	核定的排放总量
废气	氮氧化物	有组织排放	1	1处燃气锅炉在用	浓度：55mg/m³	无	200mg/m³	0.25t/a
	烟粉尘				总量：0.05t
					浓度：1.2mg/³	无	30mg/m³	0.3t/a
					总量：0.001t
废水	氨氮	间断排放	3	厂区南、北电镀厂房各有一个对外排放口	浓度：0.232mg/L	无	25mg/L	不进行总量核定
					总量：0.13t
	COD				浓度：22mg/L	无	300mg/L	不进行总量核定
