# Supplementary material
Source: ML conference proceedings conference paper supplement (https://openreview.net/forum?id=xg0fmtqh8d)
Supplement: supplementary_material [file 391_金辉集团:JinhuiShippingandTransportationLimited截至2024年6月30日止季度及六个月之第二季度及半年度报告.xlsx]

## Sheet: Sheet
	附註	2024年6月30日(未經審核)千美元	2023年6月30日(未經審核)千美元	2023年12月31日(經審核)千美元
資產
非流動資產
物業、機器及設備		352,161	371,249	333,413
使用權資產	9(a)	40,864	20,952	21,095
投資物業	10	23,544	26,477	25,259
按公平價值列賬及在其他全面收益表處理之財務資產	11	6,459	9,549	7,691
應收貸款	12	1,577	-	1,577
收購自置船舶已付訂金		3,095	-	-
		427,700	428,227	389,035
流動資產
存貨		2,106	1,996	1,383
應收貸款	12	-	1,577	-
應收貿易賬項及其他應收賬項		16,286	18,689	18,089
按公平價值列賬及在損益表處理之財務資產	13	25,117	23,041	24,094
已抵押存款		199	506	359
銀行結存及現金		16,939	27,535	40,250
		60,647	73,344	84,175
持作出售資產		-	-	10,423
		60,647	73,344	94,598
資產總值		488,347	501,571	483,633
權益及負債
資本及儲備
已發行股本		5,463	5,463	5,463
儲備		354,456	381,752	344,467
權益總值		359,919	387,215	349,930
非流動負債
有抵押銀行貸款	14	49,501	56,958	55,670
租賃負債	9(b)	28,464	17,363	24,078
		77,965	74,321	79,748
流動負債
應付貿易賬項及其他應付賬項		14,932	12,758	16,221
應付控股公司款項		130	152	176
有抵押銀行貸款	14	15,217	23,899	32,497
租賃負債	9(b)	20,184	3,226	5,061
		50,463	40,035	53,955
權益及負債總值		488,347	501,571	483,633
