# Supplementary material
Source: ML conference proceedings conference paper supplement (https://openreview.net/forum?id=xg0fmtqh8d)
Supplement: supplementary_material [file 392_邵氏兄弟控股:中期报告2024.xlsx]

## Sheet: Sheet
	附註	二零二四年六月三十日人民幣千元(未經審核)	二零二三年十二月三十一日人民幣千元(經審核)
非流動資產
廠房及設備	10	1,357	1,608
按公平值計入其他全面收入的權益工具	11	23,658	24,960
使用權資產	12	3,245	5,701
遞延稅項資產		130	141
電視節目版權		1,711	2,224
於聯營公司的權益		76	77
		30,177	34,711
流動資產
電影、劇集及非劇集投資	13	83,288	85,373
製作中電影、劇集及非劇集	13	65,198	4,294
貿易及其他應收款項	14	26,675	35,609
應收關連人士款項	17	29,474	25,349
銀行結餘、存款及現金	15	324,609	306,198
		529,244	456,823
流動負債
貿易及其他應付款項	16	61,390	39,353
合約負債	16	52,274	6,827
應付所得稅		290	282
租賃負債	12	2,015	3,256
應付關連人士款項	17	1,901	4,199
銀行借貸	18	4,674	4,557
		122,544	58,474
流動資產淨值		406,700	398,349
資產總值減流動負債		436,877	433,060
非流動負債
租賃負債	12	1,750	3,010
資產淨值		435,127	430,050
資本及儲備
股本		12,322	12,322
儲備		444,567	436,892
本公司擁有人應佔權益		456,889	449,214
非控股權益		(21,762)	(19,164)
權益總額		435,127	430,050
