# Supplementary material
Source: ML conference proceedings conference paper supplement (https://openreview.net/forum?id=xg0fmtqh8d)
Supplement: supplementary_material [file 393_招商银行:2024年中期报告.xlsx]

## Sheet: Sheet
	2024年6月30日		2023年12月31日
(人民幣百萬元,百分比除外)	金額	佔總額百分比%	金額	佔總額百分比%
衍生金融資產	20,028	0.60	18,733	0.58
以公允價值計量且其變動計入當期損益的金融投資	579,230	17.29	526,145	16.40
-債券投資	266,252	7.95	274,687	8.57
-其他 (註)	312,978	9.34	251,458	7.83
以攤餘成本計量的債務工具投資	1,754,997	52.38	1,728,620	53.86
-債券投資	1,716,315	51.23	1,680,262	52.36
-非標資產投資	75,457	2.25	87,069	2.71
-其他	660	0.02	679	0.02
-減：損失準備	(37,435)	(1.12)	(39,390)	(1.23)
以公允價值計量且其變動計入 其他綜合收益的債務工具投資	945,978	28.23	889,736	27.72
指定為以公允價值計量且其變動計入 其他綜合收益的權益工具投資	21,159	0.63	19,649	0.61
合營和聯營企業投資	28,996	0.87	26,590	0.83
投資證券及其他金融資產總額	3,350,388	100.00	3,209,473	100.00
