# Supplementary material
Source: ML conference proceedings conference paper supplement (https://openreview.net/forum?id=xg0fmtqh8d)
Supplement: supplementary_material [file 395_宁通信B:2024年半年度报告(英文版).xlsx]

## Sheet: Sheet
Item	Notes	Current period cumulative	Preceding period comparative
I. Operating revenue	XV(4)	11,828,284.34	46,221,763.63
Less:Operating cost	XV(4)	10,933,095.56	41,284,386.04
Taxes and surcharges		447,585.48	309,414.84
Selling expenses		3,556,132.99	5,379,918.1
Administrative expenses		15,861,196.24	17,481,142.62
R&D expenses			976,403.00
Financial expenses		3,277,034.82	2,571,625.34
Including:Interst expense		3,581,025.35	3,020,247.03
Interst income		307,940.4	443,798.48
Add:other income		9,574.65
Investment income (losses are listed with"-")	XV(5)	9,725,216.13	242,664.28
Including:investment income from associates and joint ventures		-66.5	-9,717.35
Derecognition income of financial assets measured atamortized cost
Net exposure hedging gain(loss are listed with "-")
Gains from changes in fair value (losses are listedwith"-")
Credit impairment loss (losses are listed with"-")		2,063,316.07	2,694,169.71
Assets impairment loss(losses are listed with"-")
Gain on assets disposal (loss are listed with"-")
II.Operating profit(loss show as“-γ)		-10,448,653.9	-18,844,292.32
Plus:non-operating revenue		550,000.00	51,484.34
Less:non-operating expenditures		794,734.53	724,961.41
Ⅲ.Total profit (total loss is listed with"-")		-10,693,388.43	-19,517,769.39
Deduct income tax expense
IV.Net profit (net loss is listed with"-")		-10,693,388.43	-19,517,769.39
(1)Net profits from continuing operations		-10,693,388.43	-19,517,769.39
(2)Discontinued operating net profit
V.Other comprehensive income net of tax
(1)Comprehensive income not to be reclassified to profit or loss
1.Changes inremeasurement of defined benefit obligations
2.Other comprehensive income not to be reclassified to profit or loss in equity method
3.Fair value changes in other equity instrument investments
4.Fair value changes in the enterprise's own credit risk
(2)Comprehensiveincome to bereclassified to profit orloss
1.Other comprehensive income to be reclassified to profit or loss in equity method
2.Gain or loss from fair value changes of other debt instruments
3.Amount of financial assets reclassified and included in other comprehensive income
4.Credit impairment provision of other debt investment
5.Cash flow hedge reserve (the effective part of cash flow hedge gains and losses)
6.Translation difference of foreign currency financial statements
7.Other
VI.Total comprehensive income		-10,693,388.43	-19,517,769.39
VII.Earnings per share:
