# Supplementary material
Source: ML conference proceedings conference paper supplement (https://openreview.net/forum?id=xg0fmtqh8d)
Supplement: supplementary_material [file 396_昊海生物科技:2024年第一季度报告.xlsx]

## Sheet: Sheet
	股東性質	持股數量	持股比例(%)	持有有限售條件股份數量	包含轉融通借出股份的限售股份數量	質押、標記或凍結情況
						股份狀態	數量
蔣偉(1)	境內自然人	47,520,000	28.17	0	0	無	0
HKSCC NOMINEES LIMITED(2)	境外法人	29,523,589	17.50	0	0	未知	–
游捷	境內自然人	28,800,000	17.07	0	0	無	0
樓國梁	境內自然人	6,151,186	3.65	0	0	無	0
吳劍英	境內自然人	6,068,369	3.60	0	0	無	0
侯永泰	境內自然人	6,006,260	3.56	0	0	無	0
彭錦華	境內自然人	2,830,000	1.68	0	0	無	0
劉遠中	境內自然人	2,000,000	1.19	0	0	無	0
黃明	境內自然人	2,000,000	1.19	0	0	無	0
王文斌	境內自然人	1,719,534	1.02	0	0	無	0
