# Supplementary material
Source: ML conference proceedings conference paper supplement (https://openreview.net/forum?id=xg0fmtqh8d)
Supplement: supplementary_material [file 397_000778-新兴铸管-2024年半年度报告_2024-08-20.xlsx]

## Sheet: Sheet
类别	期末余额					期初余额
	账面余额		坏账准备		账面价值	账面余额		坏账准备		账面价值
	金额	比例	金额	计提比例		金额	比例	金额	计提比例
按单项计提坏账准备	1,102,423,925.12	44.24%	1,102,344,998.12	99.99%	78,927.00	1,113,499,735.29	0.4639	1,113,420,808.29	99.99%	78,927.00
按组合计提坏账准备	1,389,362,075.63	55.76%	27,745,365.34	2.00%	1,361,616,710.29	1,286,595,725.95	53.61%	26,090,728.69	2.03%	1,260,504,997.26
其中:
债务人为政府部门或债务人提供足额担保组合	1,147,815,395.76	46.06%			1,147,815,395.76	1,159,676,095.76	48.32%			1,159,676,095.76
账龄组合	241,546,679.87	9.69%	27,745,365.34	11.49%	213,801,314.53	126,919,630.19	5.29%	26,090,728.69	20.56%	100,828,901.50
合计	2,491,786,000.75	100%	1,130,090,363.46	-	1,361,695,637.29	2,400,095,461.24	100%	1,139,511,536.98	-	1,260,583,924.26
