# Supplementary material
Source: ML conference proceedings conference paper supplement (https://openreview.net/forum?id=xg0fmtqh8d)
Supplement: supplementary_material [file 398_本钢板B:2024年半年度报告(英文版).xlsx]

## Sheet: Sheet
Items	Buildings	Machinery	Transportation equipment and others	Furniture and office equipment	Total
1．Gross carrying amount
（1）31 December 2023	13,031,421,747.35	51,512,912,760.03	399,037,323.55	198,681,621.21	65,142,053,452.14
（2）Increase in current period	57,782,406.88	628,914,174.75	5,662,053.10	14,119,753.29	706,478,388.02
Including: Purchase			286,053.10		286,053.10
Transferred from construction in progress	57,657,024.07	628,821,321.68	5,376,000.00	14,119,753.29	705,974,099.04
Others	125,382.81	92,853.07			218,235.88
（3）Decrease in current period	30,976,158.83	188,875,074.34	10,056,358.13	558,524.79	230,466,116.09
—Including: Disposal or scrapped	30,976,158.83	188,875,074.34	10,056,358.13	558,524.79	230,466,116.09
（4）30 June 2024	13,058,227,995.40	51,952,951,860.44	394,643,018.52	212,242,849.71	65,618,065,724.07
2．Total accumulated depreciation
（1）31 December 2023	6,637,762,628.34	32,928,064,766.56	323,798,847.36	112,924,985.39	40,002,551,227.65
（2）Increase in current period	106,370,818.07	705,687,704.82	5,428,986.40	11,923,234.34	829,410,743.63
—Including: Provision	106,370,818.07	705,687,704.82	5,428,986.40	11,923,234.34	829,410,743.63
（3）Decrease in current period	22,269,734.47	171,386,048.99	9,558,370.01	557,362.97	203,771,516.44
—Including: Disposal or scrapped	22,269,734.47	171,386,048.99	9,558,370.01	557,362.97	203,771,516.44
（4）30 June 2024	6,721,863,711.94	33,462,366,422.39	319,669,463.75	124,290,856.76	40,628,190,454.84
3．Total impairment
（1）31 December 2023	83,249,262.08	28,059,997.74			111,309,259.82
（2）Increase in current period
—Including: Provision
（3）Decrease in current period		7,908.16			7,908.16
—Including: Disposal or scrapped		7,908.16			7,908.16
（4）30 June 2024	83,249,262.08	28,052,089.58			111,301,351.66
4．Total net book value of fixed assets
（1）30 June 2024	6,253,115,021.38	18,462,533,348.47	74,973,554.77	87,951,992.95	24,878,573,917.57
（2）31 December 2023	6,310,409,856.93	18,556,787,995.73	75,238,476.19	85,756,635.82	25,028,192,964.67
