# Supplementary material
Source: ML conference proceedings conference paper supplement (https://openreview.net/forum?id=xg0fmtqh8d)
Supplement: supplementary_material [file 399_002601-龙佰集团_2024年一季度报告_2024-04-24.xlsx]

## Sheet: Sheet
项目	本报告期	上年同期	增减	变动原因
税金及附加	94,979,042.56	67,476,915.74	40.76%	主要为计提的矿产资源税和附加税的增加所致
财务费用	153,817,688.34	88,913,259.18	73.00%	主要系汇兑收益较上期减少，及利息费用增加所致
其他收益	64,609,029.29	30,559,613.91	111.42%	主要系先进制造业税收优惠政策影响所致
投资收益（损失以“－”号填列）	-16,579,356.18	-25,744,166.10	35.60%	主要系本年较上年银承贴现量减少所致
其中：对联营企业和合营企业的投资收益	26,187.68	270,691.26	-90.33%	主要系联营企业和合营企业净利润减少所致
信用减值损失（损失以“-”号填列）	-58,978,884.33	-26,428,970.33	-123.16%	主要系一季度销量增加，计提坏账准备增加所致
资产减值损失（损失以“-”号填列）	-3,301,947.49	684,561.17	-582.35%	主要系澳洲东锆存货减值所致
资产处置收益（损失以“-”号填列）	-18,804,353.42	-2,885,189.57	-551.75%	主要系评估增值资产处置所致
营业外支出	1,801,703.65	2,725,697.82	-33.90%	主要系罚款和非流动资产处置损失的减少所致
所得税费用	207,887,792.07	119,464,923.27	74.02%	主要系利润总额增加所致
