# Supplementary material
Source: ML conference proceedings conference paper supplement (https://openreview.net/forum?id=xg0fmtqh8d)
Supplement: supplementary_material [file 400_集一控股:二零二四年中期报告.xlsx]

## Sheet: Sheet
		As at於
		30 June 2024二零二四年六月三十日RMB’000人民幣千元(Unaudited)(未經審核)	31 December 2023二零二三年十二月三十一日RMB’000人民幣千元(Audited)(經審核)
Trade receivables from contract with customers:	客戶合約的貿易應收款項：
Due from third parties:	應收第三方款項：
— s ale and distribution of merchandise	— 銷售及分銷商品	289,642	283,509
— i nterior design and engineering services	— 室內設計及工程服務	50,827	50,827
Due from a related party:	應收一名關聯方款項：
— s ale and distribution of merchandise	— 銷售及分銷商品	431	431
		340,900	334,767
Less: a llowance for expected credit losses	減： 預期信貸虧損撥備	(60,856)	(16,589)
		280,044	318,178
Other receivables	其他應收款項
Contract performance deposits (Note (a))	合約履約按金（附註 (a)）	6,649	6,649
Project tender deposits (Note (b))	工程招標按金（附註 (b)）	65,844	65,844
Other tax recoverable	其他可收回稅項	1,465	1,447
Rental deposits	租賃按金	165	165
Receivables relating to the refund of investment proceeds (Note (e))	投資所得款項退還相關應收款項（附註 (e)）	21,231	21,231
Others	其他	9,336	9,336
		104,690	104,672
Less: al lowance for expected credit losses	減： 預期信貸虧損撥備	(23,733)	(23,733)
		80,957	80,939
Prepayments	預付款項
Prepayments for purchase of goods and provision of services (Note(c))	購買貨品及提供服務之預付款項（附註(c)）	347,848	347,848
Less: al lowance for expected credit losses	減：預期信貸虧損撥備	(347,848)	(347,848)
Prepayment for acquisition of investment properties (Note (d))	收購投資物業之預付款項（附註(d)）	33,977	33,977
		33,977	33,977
Notes receivable arising from bulk commodity trading business(Note(f))	大宗商品貿易業務產生的應收票據（附註(f)）	–	100,000
Total trade and other receivables and prepayments	貿易及其他應收款項以及預付款項總額	394,978	533,094
Analysed as	分析為
Non-current	非流動	33,977	33,977
Current	流動	361,001	499,117
		394,978	533,094
