# Supplementary material
Source: ML conference proceedings conference paper supplement (https://openreview.net/forum?id=xg0fmtqh8d)
Supplement: supplementary_material [file 401_马鞍山钢铁股份:2024年中期报告.xlsx]

## Sheet: Sheet
單位名稱	款項的性質	年末餘額	賬齡	佔年末餘額合計數的比例 (%)	壞賬準備年末餘額
公司1	資產處置款	163,262,000	2年以內	41	(17,953,820)
公司2	資產處置款	49,891,137	1年以內	13	(498,911)
公司3	往來款	45,390,133	3年以上	11	(45,390,133)
公司4	鋼材期貨保證金	43,326,088	2年以內	11	–
公司5	鋼材期貨保證金	37,927,619	2年以內	10	–
合計		339,796,977		86	(63,842,864)
