# Supplementary material
Source: ML conference proceedings conference paper supplement (https://openreview.net/forum?id=xg0fmtqh8d)
Supplement: supplementary_material [file 402_深康佳B:2024年半年度报告(英文版).xlsx]

## Sheet: Sheet
Item	Closing balance	Opening balance
Interest on term deposits	7,098,359.12	6,325,400.49
Total	7,098,359.12	6,325,400.49
