# Supplementary material
Source: ML conference proceedings conference paper supplement (https://openreview.net/forum?id=xg0fmtqh8d)
Supplement: supplementary_material [file 403_郑州银行:中期报告2024.xlsx]

## Sheet: Sheet
	2024年6月30日	2023年12月31日
存放境內銀行款項	683,470	826,701
存放境內其他金融機構款項	179,094	317,842
存放境外銀行款項	93,423	97,450
小計	955,987	1,241,993
應計利息	2,909	3,792
減:減值準備	(2,464)	(1,623)
合計	956,432	1,244,162
