# Supplementary material
Source: ML conference proceedings conference paper supplement (https://openreview.net/forum?id=xg0fmtqh8d)
Supplement: supplementary_material [file 404_天齐锂业:内幕消息_海外监管公告-2024年第一季度报告.xlsx]

## Sheet: Sheet
	期初普通帳戶、信用帳戶持股		期初轉融通出借股份且尚未歸還		期末普通帳戶、信用帳戶持股		期末轉融通出借股份且尚未歸還
股東名稱(全稱)	數量合計	佔總股本的比例(%)	數量合計	佔總股本的比例(%)	數量合計	佔總股本的比例(%)	數量合計	佔總股本的比例(%)
中國銀行股份有限公司-嘉實滬深300交易型開放式指數證券投資基金	2,396,500	0.15%	53,900	0.00%	6,036,100	0.37%	0	0.00%
中國建設銀行股份有限公司-易方達滬深300交易型開放式指數發起式證券投資基金	2,819,978	0.17%	71,100	0.00%	7,777,778	0.47%	65,500	0.00%
中國工商銀行股份有限公司-匯添富中證新能源汽車產業指數型發起式證券投資基金(LOF)	7,158,125	0.44%	243,500	0.01%	7,126,425	0.43%	36,100	0.00%
中國工商銀行股份有限公司-華泰柏瑞滬深300交易型開放式指數證券投資基金	7,664,657	0.47%	113,700	0.01%	11,194,657	0.68%	0	0.00%
