# Supplementary material
Source: ML conference proceedings conference paper supplement (https://openreview.net/forum?id=xg0fmtqh8d)
Supplement: supplementary_material [file 405_药明康德:2024年第一季度报告.xlsx]

## Sheet: Sheet
股東名稱	股東性質	持股數量	持股比例(%)	持有有限售條件股份數量	質押、標記或凍結情況
					股份狀態	數量
HKSCC NOMINEES LIMITED (註1)	境外法人	387,025,332	13.1941	0	未知	0
G&C VI Limited	境外法人	143,015,795	4.8755	0	無	0
香港中央結算有限公司 (註2)	境外法人	130,142,868	4.4367	0	無	0
SUMMER BLOOM INVESTMENTS(I)PTE.LTD.	境外法人	113,911,696	3.8834	0	無	0
G&C IV Hong Kong Limited	境外法人	104,626,051	3.5668	0	無	0
北京中民銀孚投資管理有限公司—嘉興宇祥投資合夥企業(有限合夥)	其他	87,074,568	2.9685	0	無	0
G&C V Limited	境外法人	73,105,843	2.4922	0	無	0
中國工商銀行股份有限公司—中歐醫療健康混合型證券投資基金	其他	58,983,592	2.0108	0	無	0
中國人壽保險股份有限公司—傳統—普通保險產品—005L—CT001滬	其他	54,431,937	1.8556	0	無	0
G&C VII Limited	境外法人	37,853,259	1.2905	0	無	0
