# Supplementary material
Source: ML conference proceedings conference paper supplement (https://openreview.net/forum?id=xg0fmtqh8d)
Supplement: supplementary_material [file 406_复星医药:二零二四年中期报告.xlsx]

## Sheet: Sheet
公司名稱	主要業務	註冊資本	總資產	淨資產	營業收入	營業利潤	淨利潤
重慶藥友	藥品研發與製造	197	8,227	6,282	2,813	544	461
萬邦醫藥	藥品研發與製造	480	7,005	4,151	4,012	400	351
復宏漢霖 (註1)	藥品研發與製造	543	9,980	2,578	2,746	397	386
桂林南藥	藥品研發與製造	285	2,300	1,340	662	211	180
Gland Pharma(註2)	藥品研發與製造	不適用	10,943	8,817	2,541	318	201
