# Supplementary material
Source: ML conference proceedings conference paper supplement (https://openreview.net/forum?id=xg0fmtqh8d)
Supplement: supplementary_material [file 407_建设银行:2024年第一季度报告.xlsx]

## Sheet: Sheet
普通股股東名稱	股東性質	持股數量	持股比例(%)
中央匯金投資有限責任公司1	國家	142,590,494,651(H 股)	57.03
		267,392,944(A 股)	0.11
香港中央結算(代理人)有限公司2	境外法人	93,818,297,735(H 股)	37.53
中國證券金融股份有限公司	國有法人	2,189,259,672(A 股)	0.88
國家電網有限公司3	國有法人	1,611,413,730(H 股)	0.64
益嘉投資有限責任公司	境外法人	856,000,000(H 股)	0.34
香港中央結算有限公司4	境外法人	724,260,410(A 股)	0.29
中國長江電力股份有限公司	國有法人	648,993,000(H 股)	0.26
中央匯金資產管理有限責任公司	國有法人	496,639,800(A 股)	0.20
中國寶武鋼鐵集團有限公司	國有法人	335,000,000(H 股)	0.13
華夏人壽保險股份有限公司-自有資金	其他	171,437,969(A 股)	0.07
