# Supplementary material
Source: ML conference proceedings conference paper supplement (https://openreview.net/forum?id=xg0fmtqh8d)
Supplement: supplementary_material [file 408_杭汽轮B:2024年半年度报告(英文版).xlsx]

## Sheet: Sheet
Item	The first half year of 2023	The first half year of 2023
I. Income from the key business	1,167,067,845.85	1,354,566,807.13
Incl：Business cost	977,577,799.07	1,124,848,275.54
Business tax and surcharge	10,199,795.22	-1,095,724.82
Sales expense	50,734,896.52	46,251,818.45
Administrative expense	144,386,696.18	153,298,889.89
R & D expense	30,531,976.39	112,101,542.39
Financial expenses	-1,476,802.98	-6,941,422.67
Including：Interest expenses	3,939,320.11	4,061,792.74
Interest income	9,074,663.28	12,807,834.86
Add：Other income	35,723,414.44	28,885,376.28
Including: investment gains from affiliates
Financial assets measured at amortized cost cease to be recognized as income
Net exposure hedging income
Changing income of fair value	-494,402.22	-21,128.30
Credit impairment loss	-61,814,561.38	-41,527,398.87
Impairment loss of assets Assets disposal income	-30,298,066.41	-6,964,479.71
II. Operational profit（“-”for loss）	194,973,180.77	103,283,633.41
Add ：Non-operational income	46,605,165.11	17,482,924.34
Less：Non -operational expenses	14,105,578.30	504,492.85
III. Total profit(“-”for loss)	227,472,767.58	120,262,064.90
Less：Income tax expenses	-16,078,089.13	-13,629,302.15
IV. Net profit	243,550,856.71	133,891,367.05
1.Net continuing operating profit	243,550,856.71	133,891,367.05
2.Termination of operating net profit
V. Net after-tax of other comprehensive income	702,525,532.31	-307,354,921.24
（I）Other comprehensive income Item that will not be reclassified into gains/losses in the subsequent accounting period	702,525,532.31	-307,354,921.24
1.Re- measurement of defined benefit plans of changes in net debt or net as sets
2.Other comprehensive income under the equity method investee can not be reclassified into profit or loss.
3. Changes in the fair value of investments in other equity instruments	702,525,532.31	-307,354,921.24
4. Changes in the fair value of the company’s credit risks
5.Other
(II)Other comprehensive income that will be reclassified into profit o r loss
1.Other comprehensive income under the equity method investee can be reclassified into profit or loss.
2. Changes in the fair value of investments in other debt obligations
3. Other comprehensive income arising from the reclassification of financial assets
4.Allowance for credit impairments in investments in other debt obligations
5. Reserve for cash flow hedges
6.Translation differences in currency financial statements
7.Other
VI. Total comprehensive income	946,076,389.02	-173,463,554.19
VII. Earnings per share
（I）Basic earnings per share
(II)Diluted earnings per share
