# Supplementary material
Source: ML conference proceedings conference paper supplement (https://openreview.net/forum?id=xg0fmtqh8d)
Supplement: supplementary_material [file 409_美的集团:2024年一季度报告(英文版).xlsx]

## Sheet: Sheet
Financial statement items (consolidated)	31 March 2024/January_x0002_March 2024	31 December 2023/January_x0002_March 2023	Change (%)	Reasons for the changes
Derivative financial assets	1,759,324	1,278,161	37.64%	Mainly due to the changes in the fair value of derivative financial instruments
Receivables financing	19,019,180	13,330,008	42.68%	Mainly due to the increased notes receivable at fair value through other comprehensive income
Current portion of non-current assets	7,211,636	10,760,577	-32.98%	Mainly due to the decreased current portion of financial product investments with fixed income
Derivative financial liabilities	680,097	257,668	163.94%	Mainly due to the changes in the fair value of derivative financial instruments
Employee benefits payable	5,559,443	9,076,027	-38.75%	Mainly due to the payment of remunerations to employees
Current portion of non-current liabilities	8,230,153	14,457,710	-43.07%	Mainly due to the repayment of the current portion of borrowings
Treasury stock	7,651,734	12,871,738	-40.55%	Mainly due to the retirement of treasury stock
Other comprehensive income	-617,669	-164,202	-276.16%	Mainly due to the changes in differences on translation of foreign currency financial statements
Financial expenses/(income)	-557,258	710,597	-178.42%	Fluctuations in the valuation of assets and liabilities denominated in minor currencies, such as the Egyptian pound, and other foreign currencies, such as the United States dollar, the euro and the Japanese yen
Other income	643,446	339,952	89.28%	Mainly due to the increased input tax credits
Investment income	27,984	266,267	-89.49%	Mainly due to the decreased investment income from the disposal of derivative financial assets and liabilities
Losses/(gains) on changes in fair value	-280,110	117,441	-338.51%	Mainly due to the changes in the fair value of investments in equity instruments
Asset impairment losses	-176,207	-135,237	-30.29%	Mainly due to the increased inventory valuation losses
Losses/(gains) on disposal of assets	-3,777	11,215	-133.68%	Mainly due to the decreased gains on disposal of non-current assets
Non-operating income	115,251	35,234	227.10%	Mainly due to the increased other income
Non-operating expenses	-25,427	-7,491	-239.43%	Mainly due to the increased other expenses
Net profit attributable to minority interests	36,314	103,879	-65.04%	Mainly due to the decreased profits of non-wholly-owned subsidiaries
Net cash flows from operating activities	13,928,908	9,272,312	50.22%	Mainly due to the increased cash received from sales of goods or rendering of services
Net cash flows from investing activities	-5,954,871	-25,100,790	76.28%	Mainly due to the increased cash received from disposal of investments and the decreased cash paid to acquire investments
Net cash flows from financing activities	-5,090,826	9,068,738	-156.14%	Mainly due to the decreased cash received from borrowings and the increased cash repayments of borrowings
