# Supplementary material
Source: ML conference proceedings conference paper supplement (https://openreview.net/forum?id=xg0fmtqh8d)
Supplement: supplementary_material [file 410_000923-河钢资源_2024年一季度报告_2024-04-27.xlsx]

## Sheet: Sheet
报告期末普通股股东总数		27,468	报告期末表决权恢复的优先股股东总数（如有）			0
前10名股东持股情况（不含通过转融通出借股份）
股东名称	股东性质	持股比例（%）	持股数量	持有有限售条件的股份数量	质押、标记或冻结情况
					股份状态	数量
河钢集团有限公司	国有法人	34.59%	225,780,299.00	0.00	不适用	0.00
林丽娜	境内自然人	4.03%	26,312,878.00	0.00	质押	26,312,878.00
					冻结	26,312,878.00
长天（辽宁）实业有限公司	境内非国有法人	3.80%	24,827,607.00	24,827,607.00	质押	24,827,607.00
天津物产进出口贸易有限公司	国有法人	2.31%	15,052,031.00	0.00	不适用	0.00
河北国控资本管理有限公司	国有法人	2.09%	13,672,200.00	0.00	质押	4,750,000.00
香港中央结算有限公司	境外法人	1.53%	9,960,737.00	0.00	不适用	0.00
范自强	境内自然人	0.99%	6,471,700.00	0.00	不适用	0.00
全国社保基金六零二组合	其他	0.95%	6,169,904.00	0.00	不适用	0.00
国联安基金－中国太平洋人寿保险股份有限公司－分红险－国联安基金中国太平洋人寿股票相对收益型（保额分红）单一资产管理计划	其他	0.88%	5,740,956.00	0.00	不适用	0.00
中欧基金－农业银行－中国太平洋人寿股票相对收益型产品（保额分红）委托投资计划	其他	0.81%	5,292,500.00	0.00	不适用	0.00
前10名无限售条件股东持股情况
股东名称		持有无限售条件股份数量			股份种类
					股份种类	数量
河钢集团有限公司		225,780,299.00			人民币普通股	225,780,299.00
林丽娜		26,312,878.00			人民币普通股	26,312,878.00
天津物产进出口贸易有限公司		15,052,031.00			人民币普通股	15,052,031.00
河北国控资本管理有限公司		13,672,200.00			人民币普通股	13,672,200.00
香港中央结算有限公司		9,960,737.00			人民币普通股	9,960,737.00
#范自强		6,471,700.00			人民币普通股	6,471,700.00
全国社保基金六零二组合		6,169,904.00			人民币普通股	6,169,904.00
国联安基金－中国太平洋人寿保险股份有限公司－分红险－国联安基金中国太平洋人寿股票相对收益型（保额分红）单一资产管理计划		5,740,956.00			人民币普通股	5,740,956.00
中欧基金－农业银行－中国太平洋人寿股票相对收益型产品（保额分红）委托投资计划		5,292,500.00			人民币普通股	5,292,500.00
中国建设银行股份有限公司－华商优势行业灵活配置混合型证券投资基金		4,021,800.00			人民币普通股	4,021,800.00
上述股东关联关系或一致行动的说明			公司未知上述股东是否存在关联关系，是否属于一致行动人。
前10名股东参与融资融券业务情况说明（如有）			无
