# Supplementary material
Source: ML conference proceedings conference paper supplement (https://openreview.net/forum?id=xg0fmtqh8d)
Supplement: supplementary_material [file 411_海康威视:2024年第一季度报告(英文版).xlsx]

## Sheet: Sheet
Item	2024 Q1	2023 Q1
I. Total Revenue	17,817,550,424.43	16,201,189,412.53
Including: Revenue	17,817,550,424.43	16,201,189,412.53
II. Total Operating Costs	15,618,779,641.18	14,248,163,903.28
Including: Cost of sales and services	9,664,818,848.68	8,883,871,635.31
Business taxes and surcharges	178,185,758.74	162,501,664.68
Selling expenses	2,461,582,859.03	2,185,218,373.11
Administrative expenses	680,114,466.85	602,999,255.69
Research and Development (R&D) expenses	2,671,475,230.52	2,464,108,463.39
Financial expenses	(37,397,522.64)	(50,535,488.90)
Including：Interest expenses	136,117,640.40	90,784,879.24
Interest income	300,008,788.25	230,994,108.15
Add: Other Income	559,337,897.73	431,143,072.40
Investment income (loss"-")	(90,237,693.78)	53,024,459.67
Including: Investment gains in associated enterprise and joint-venture enterprise	(63,804,379.76)	8,539,228.50
Gains (loss "-") from changes in fair values	70,731,744.13	76,962,398.56
Credit impairment losses ("-")	(95,251,432.28)	(110,068,759.04)
Impairment losses ("-") of assets	(69,525,214.28)	(141,629,819.18)
Asset disposal income (loss"-")	(7,338,187.59)	(2,263,571.88)
III. Operating Profit (loss"-")	2,566,487,897.18	2,260,193,289.78
Add: Non-operating income	17,311,883.58	32,861,901.41
Less: Non-operating expenses	6,301,591.43	3,222,199.80
IV. Total Profit (loss"-")	2,577,498,189.33	2,289,832,991.39
Less: Income tax expenses	355,425,007.20	341,609,181.69
V. Net Profit (loss"-")	2,222,073,182.13	1,948,223,809.70
5.1 Classification by operation continuity
(a) Net profit (loss) on continuous operation	2,222,073,182.13	1,948,223,809.70
(b) Net profit (loss) on terminated operation
5.2 Classification by attribution of ownership
(a) Net profit attributable to owners of parent company	1,915,903,199.88	1,811,255,388.03
(b) Profit or loss attributable to minority shareholders	306,169,982.25	136,968,421.67
VI. Other Comprehensive Income, Net of Income Tax	33,548,490.10	54,430,037.77
Other comprehensive income attributable to owners of the Company, net of tax	14,987,924.38	21,506,594.75
(I) Items that will not be reclassified subsequently to profit or loss
(II) Other comprehensive income to be reclassified to profit or loss in subsequent periods	14,987,924.38	21,506,594.75
1. Exchange differences arising on conversion of financial statements denominated in foreign currencies	14,987,924.38	21,506,594.75
Other comprehensive income attributable to minority interests, net of tax	18,560,565.72	32,923,443.02
VII. Total Comprehensive Income	2,255,621,672.23	2,002,653,847.47
Total comprehensive income attributable to owners of the parent company	1,930,891,124.26	1,832,761,982.78
Total comprehensive income attributable to minority shareholders	324,730,547.97	169,891,864.69
VIII. Earnings per Share
(I) Basic earnings per share	0.208	0.196
(II) Diluted earnings per share	0.208	0.196
