# Supplementary material
Source: ML conference proceedings conference paper supplement (https://openreview.net/forum?id=xg0fmtqh8d)
Supplement: supplementary_material [file 412_九阳股份:2024年半年度报告摘要(英文版).xlsx]

## Sheet: Sheet
Total number of common shareholders at the end of the Reporting Period	43030	Total number of preferred shareholders with resumed voting rights at the end of the Reporting Period (if any)				0
Top 10 common shareholders（excluding lending and transfer of shares business）
Name of shareholder	Nature of shareholder	Shareholding percentage	Total shares held at the period-end	Number of restricted shares held	Pledged or frozen shares
					Status	Number
Shanghai Lihong Enterprise Management Co., Ltd.	Domestic non- state-owned corporation	50.13%	384,523,746	0	N/A	0
BILTING DEVELOPMENTS LIMITED	Foreign corporation	16.94%	129,924,090	0	N/A	0
Joyoung ESOP Plan (Phase 1)	Others	2.09%	16,000,000	0	N/A	0
Hong Kong Securities Clearing Co., Ltd.	Foreign corporation	1.81%	13,872,582	0	N/A	0
Central Huijin Investment Ltd.	State-owned corporation	1.46%	11,201,233	0	N/A	0
China Universal Asset Management Co.,Ltd - Social Security Fund Portfolio No.423	Others	1.09%	8,361,510	0	N/A	0
China Life Insurance Co., Ltd.-Traditional- General Insurance Product - 005L - CT001 SH	Others	1.02%	7,798,088	.0	N/A	0
CPIC-Dividend-Personal Dividend	Others	0.40%	3,045,512	0	N/A	0
PICC P&C-Traditional-General Insurance Products	Others	0.33%	2,512,340	0	N/A	0
National Social Security Fund Portfolio No. 101	Others	0.26%	2,031,792	0	N/A	0
Related or acting-in-concert parties among shareholders above	In April 2019, the shareholding structure of BILTING DEVELOPMENTS LIMITED changed. MR. Xuning WANG, the actual controller of the Company, became the actual controller of BILTING DEVELOPMENTS LIMITED (See Report No. 2019-027 of the Company on www.chinainfo.com.cn.). As a result, Shanghai Lihong Enterprise Management Co., Ltd. and BILTING DEVELOPMENTS LIMITED, both controlled by Mr. Xuning WANG, ar…
Explanation on common shareholders participating in securities margin trading (if any)	N/A
Notes on the existence of repurchase specialized accounts among the top 10 shareholders (if any)	The number of ordinary shares held in the repurchase specialized account of Joyoung Co., Ltd. at the end of the reporting period was 4,000,000 shares, accounting for 0.52% of the total share capital of the Company.
