# Supplementary material
Source: ML conference proceedings conference paper supplement (https://openreview.net/forum?id=xg0fmtqh8d)
Supplement: supplementary_material [file 413_宁通信B:公司2024年第一季度报告(英文版).xlsx]

## Sheet: Sheet
Total number of common shareholders at the end of the reporting period		7,657	Total number of preferred shareholders whose voting rights were restored at the end of the reporting period			0
Shareholding of the top 10 shareholders (excluding shares lent through refinancing)
Shareholder name	Type of shareholder	Shareholding ratio (%)	Number of shares held	Number of non- tradable shares held	Pledge, marking or freezing
					Shares status	Quantity
CETC Glarun Group Co., Ltd.	State-owned legal person	53.49%	115,000,000.00	115,000,000.00	Not applicable	0.00
He Wei	Natural person in China	1.44%	3,105,400.00	0.00	Not applicable	0.00
Shenwan Hongyuan Securities (H.K.)Ltd	Overseas legal person	1.40%	3,003,288.00	0.00	Not applicable	0.00
Zheng Enyue	Natural person in China	1.14%	2,449,739.00	0.00	Not applicable	0.00
GUOTAI JUNAN SECURITIES (HONG KONG) LIMITED	Overseas legal person	1.08%	2,326,603.00	0.00	Not applicable	0.00
Gu Jinhua	Natural person in China	0.87%	1,871,371.00	0.00	Not applicable	0.00
Sun Huiming	Natural person in China	0.84%	1,800,000.00	0.00	Not applicable	0.00
Li Mingling	Natural person in China	0.54%	1,168,820.00	0.00	Not applicable	0.00
Zhen Hongquan	Natural person in China	0.47%	1,010,900.00	0.00	Not applicable	0.00
Xiang Yan	Natural person in China	0.42%	905,602.00	0.00	Not applicable	0.00
Shareholding of the top 10 tradable shareholders
Shareholder name		Number of listed and tradable shares held			Type of shares
					Type of shares	Quantity
He Wei		3.105.400.00			Domestic listed foreign shares	3,105,400.00
Shenwan Hongyuan Securities (H.K.)Ltd.		3,003,288.00			Domestic listed foreign shares	3,003,288.00
Zheng Enyue		2,449,739.00			Domestic listed foreign shares	2,449,739.00
GUOTAIJUNAN SECURITIES (HONG KONG)LIMITED		2,326,603.00			Domestic listed foreign shares	2,326,603.00
Gu Jinhua		1,871,371.00			Domestic listed foreign shares	1,871,371.00
Sun Huiming		1,800,000.00			Domestic listed foreign shares	1,800,000.00
LiMingling		1,168,820.00			Domestic listed foreign shares	1,168,820.00
Zhen Hongquan		1,010,900.00			Domestic listed foreign shares	1,010,900.00
XiangYan		905,602.00			Domestic listed foreign shares	905,602.00
Xia Zulin		900,000.00			Domestic listed foreign shares	900,000.00
Description of the above-mentioned shareholders association or concerted actions			Among the top ten shareholders,CETC Glarun Group Co.,Ltd.was not related to other shareholders and was not a party acting in concert.The Company did not know whether other shareholders were relatedto each other or were parties acting in concert.
Explanation of top 10 shareholders participating in margin financing and securities lending business(if any)			None
