# Supplementary material
Source: ML conference proceedings conference paper supplement (https://openreview.net/forum?id=xg0fmtqh8d)
Supplement: supplementary_material [file 414_洛阳钼业:二零二四年第一季度报告.xlsx]

## Sheet: Sheet
股東名稱	股東性質	持股數量	持股比例(%)	持有有限售條件股份數量	質押、標記或凍結情況
					股份狀態	數量
鴻商產業控股集團有限公司	境內非國有法人	533,322.00	24.69	0	無	0
洛陽礦業集團有限公司	境內非國有法人	532,978.04	24.68	0	無	0
HKSCC NOMINEES LIMITED	境外法人	359,814.57	16.66	0	未知	0
香港中央結算有限公司	境外法人	77,782.36	3.60	0	無	0
中信建投證券-中國中信金融資產管理股份有限公司-中信建投-先鋒單一資產管理計劃	未知	27,365.66	1.27	0	無	0
中國國有企業結構調整基金股份有限公司	國有法人	18,148.26	0.84	0	無	0
寧波杉杉創業投資有限公司	境內非國有法人	15,000.00	0.69	0	無	0
中國工商銀行股份有限公司-東方紅啟恒三年持有期混合型證券投資基金	未知	9,328.67	0.43	0	無	0
中國工商銀行股份有限公司-華泰柏瑞滬深300交易型開放式指數證券投資基金	未知	7,641.30	0.35	0	無	0
中國農業銀行股份有限公司-大成新銳產業混合型證券投資基金	未知	6,279.49	0.29	0	無	0
