# Supplementary material
Source: ML conference proceedings conference paper supplement (https://openreview.net/forum?id=xg0fmtqh8d)
Supplement: supplementary_material [file 415_泸州老窖:2024年半年度报告(英文版).xlsx]

## Sheet: Sheet
Name of Related Party	Transaction	Amount in current period	Amount in previous period
Sales of goods:
Laojiao Group and its subsidiaries	Liquor, etc.	6,239,724.87	25,081,222.00
CTS Luzhou Laojiao Cultural Tourism Development Co., Ltd.	Liquor	44,376,913.68	36,413,711.34
Luzhou Sanrenxuan Liquor Industry Co., Ltd.	Liquor	5,106,000.00	1,572,136.80
Sichuan Tianfu Granary Liquor Industry Co., Ltd.	Liquor	1,532,509.47
Total		57,255,148.02	63,067,070.14
