# Supplementary material
Source: ML conference proceedings conference paper supplement (https://openreview.net/forum?id=xg0fmtqh8d)
Supplement: supplementary_material [file 416_海康威视:2024年第一季度报告(英文版).xlsx]

## Sheet: Sheet
Items	2024 Q1 (RMB)	2023 Q1 (RMB)	YoY Change (%)	Note of changes
Investment income (losses are listed with a "- " symbol)	-90,237,693.78	53,024,459.67	-270.18%	In the same period of last year, the income from the business combination not under the same control was realized step by step through multiple transactions, and there was no similar event in the current period
Asset impairment losses (losses are listed with a "- " symbol)	-69,525,214.28	-141,629,819.18	50.91%	Decrease in provision for inventory depreciation
Minority Shareholders' Gains and Losses	306,169,982.25	136,968,421.67	123.53%	Increase in the profit of the holding subdisidaries
