# Supplementary material
Source: ML conference proceedings conference paper supplement (https://openreview.net/forum?id=xg0fmtqh8d)
Supplement: supplementary_material [file 417_中金公司:2024中期报告.xlsx]

## Sheet: Sheet
	附註	2024年6月30日 (未經審計)	2023年12月31日 (經審計)
非流動資產:
物業及設備	19	2,177,918,721	2,111,952,465
使用權資產	20	5,045,517,406	5,307,465,340
投資性房地產		15,589,334	16,954,681
商譽	21	1,622,663,283	1,622,663,283
無形資產	22	1,078,173,054	1,091,923,558
對聯營及合營企業投資		1,088,102,819	1,076,105,418
以公允價值計量且其變動計入其他綜合收益的權益工具	31	1,719,564,549	–
以公允價值計量且其變動計入當期損益的金融資產	23	9,749,689,760	10,458,603,897
買入返售金融資產	24	44,810,775	–
存出保證金	25	7,786,926,307	9,567,292,642
遞延所得稅資產	26	2,908,142,567	2,882,886,608
其他非流動資產	27	522,187,127	554,853,838
非流動資產總額		33,759,285,702	34,690,701,730
流動資產:
應收款項	28	36,397,565,682	34,009,494,100
融出資金	29	33,217,130,166	35,809,567,751
以公允價值計量且其變動計入其他綜合收益的債務工具	30	78,510,476,492	65,619,113,753
以公允價值計量且其變動計入當期損益的金融資產	23	238,686,562,787	274,222,650,543
買入返售金融資產	24	28,715,779,236	19,921,400,809
衍生金融資產	32	11,519,962,182	12,005,392,524
代客戶持有的現金	33	74,311,947,400	74,851,006,586
現金及銀行結餘	34	63,070,110,232	72,135,760,946
其他流動資產		915,551,720	1,041,497,942
流動資產總額		565,345,085,897	589,615,884,954
資產總額		599,104,371,599	624,306,586,684
流動負債:
以公允價值計量且其變動計入當期損益的金融負債	36	33,700,350,320	40,511,113,214
衍生金融負債	32	11,047,727,434	9,546,642,036
應付經紀業務客戶款項	37	82,032,005,523	82,311,014,432
拆入資金	38	31,097,258,576	44,974,394,819
已發行的短期債務工具	39	17,110,935,672	17,286,796,558
賣出回購金融資產款	40	68,580,195,600	64,899,065,724
應付職工薪酬		3,610,161,331	4,993,391,031
應付所得稅		531,010,723	387,829,520
已發行的將於一年內到期的長期債務工具	43	26,482,538,700	41,800,648,501
租賃負債		880,129,634	945,487,671
合同負債	41	505,402,674	411,274,527
其他流動負債	42	93,201,500,143	99,093,700,197
流動負債總額		368,779,216,330	407,161,358,230
流動資產淨額		196,565,869,567	182,454,526,724
總資產減流動負債		230,325,155,269	217,145,228,454
非流動負債:
長期應付職工薪酬		436,932,389	897,025,885
已發行的長期債務工具	43	119,797,636,766	106,936,985,625
遞延所得稅負債	26	519,439,441	582,690,484
租賃負債		3,295,809,475	3,482,376,639
其他非流動負債		348,745,177	348,751,870
非流動負債總額		124,398,563,248	112,247,830,503
淨資產		105,926,592,021	104,897,397,951
權益:
股本	44(a)	4,827,256,868	4,827,256,868
其他權益工具	45	16,400,000,000	16,400,000,000
儲備	44(b)	51,044,868,572	50,552,108,799
未分配利潤		33,359,337,528	32,823,934,064
歸屬於本公司股東的權益總額		105,631,462,968	104,603,299,731
非控制性權益		295,129,053	294,098,220
權益總額		105,926,592,021	104,897,397,951
