# Supplementary material
Source: ML conference proceedings conference paper supplement (https://openreview.net/forum?id=xg0fmtqh8d)
Supplement: supplementary_material [file 418_中金公司:2024中期报告.xlsx]

## Sheet: Sheet
項目	截至2024年 6月30日止 六個月期間	截至2023年 6月30日止 六個月期間	增減額	變動百分比
利息收入
存放金融機構利息收入	1,732.6	1,776.0	(43.4)	(2.4%)
融資融券利息收入	1,131.0	1,392.6	(261.6)	(18.8%)
買入返售金融資產利息收入	354.0	414.4	(60.4)	(14.6%)
以公允價值計量且其變動計入其他綜合收益的債務工具利息收入	981.8	858.4	123.3	14.4%
其他	225.8	472.9	(247.1)	(52.3%)
利息收入總計	4,425.1	4,914.3	(489.2)	(10.0%)
利息支出
應付經紀業務客戶款項利息支出	155.5	183.3	(27.8)	(15.2%)
賣出回購金融資產款利息支出	939.4	649.8	289.6	44.6%
拆入資金利息支出	506.3	1,181.3	(675.0)	(57.1%)
已發行債務工具利息支出	2,956.7	2,732.0	224.7	8.2%
租賃負債利息支出	76.2	39.8	36.4	91.6%
其他	604.6	547.5	57.1	10.4%
利息支出總計	5,238.7	5,333.7	(95.0)	(1.8%)
利息淨支出	(813.5)	(419.4)	(394.1)	94.0%
