# Supplementary material
Source: ML conference proceedings conference paper supplement (https://openreview.net/forum?id=xg0fmtqh8d)
Supplement: supplementary_material [file 419_中国外运:二零二四年第一季度报告.xlsx]

## Sheet: Sheet
項目	2024年第一季度	2023年第一季度
一、營業總收入	24,286,629,941.58	22,468,998,300.17
其中：營業收入	24,286,629,941.58	22,468,998,300.17
二、營業總成本	24,160,820,442.75	22,153,725,801.37
其中：營業成本	23,035,821,810.64	20,930,067,907.11
稅金及附加	69,125,498.86	63,706,470.10
銷售費用	250,949,307.17	240,119,909.29
管理費用	693,844,718.28	731,406,162.11
研發費用	26,492,228.50	29,097,675.12
財務費用	84,586,879.30	159,327,677.64
其中：利息費用	106,931,980.86	131,124,676.78
利息收入	44,639,086.41	61,282,963.87
加：其他收益	477,626,321.76	461,343,309.52
投資收益（損失以“-”號填列）	478,269,825.65	482,825,786.26
其中：對聯營企業和合營企業的投資收益	478,269,825.65	482,825,786.26
以攤餘成本計量的金融資產終止確認收益
淨敞口套期收益（損失以“-”號填列）
公允價值變動收益（損失以“-”號填列）	-14,950,802.81	-8,247,891.57
信用減值損失（損失以“-”號填列）	-50,596,504.84	-38,558,649.39
資產減值損失（損失以“-”號填列）	5,044.87	10,570.04
資產處置收益（損失以“-”號填列）	-851,865.36	537,238.58
三、營業利潤（虧損以“-”號填列）	1,015,311,518.10	1,213,182,862.24
加：營業外收入	7,704,541.16	20,354,023.17
減：營業外支出	5,093,382.87	6,041,092.22
四、利潤總額（虧損總額以“-”號填列）	1,017,922,676.39	1,227,495,793.19
減：所得稅費用	175,626,427.41	228,076,202.88
五、淨利潤（淨虧損以“-”號填列）	842,296,248.98	999,419,590.31
（一）按經營持續性分類
1.持續經營淨利潤（淨虧損以“-”號填列）	842,296,248.98	999,419,590.31
2.終止經營淨利潤（淨虧損以“-”號填列）
（二）按所有權歸屬分類
1.歸屬於母公司股東的淨利潤（淨虧損以“-”號填列）	802,732,725.54	956,190,111.75
2.少數股東損益（淨虧損以“-”號填列）	39,563,523.44	43,229,478.56
六、其他綜合收益的稅後淨額
（一）歸屬母公司所有者的其他綜合收益的稅後淨額	-26,706,784.65	-9,506,223.13
1．不能重分類進損益的其他綜合收益	43,268.96	-432,689.55
（1）重新計量設定受益計劃變動額
（2）權益法下不能轉損益的其他綜合收益
（3）其他權益工具投資公允價值變動	43,268.96	-432,689.55
（4）企業自身信用風險公允價值變動
2．將重分類進損益的其他綜合收益	-26,750,053.61	-9,073,533.58
（1）權益法下可轉損益的其他綜合收益	8,883,191.27	-13,889,234.31
（2）其他債權投資公允價值變動
（3）金融資產重分類計入其他綜合收益的金額
（4）其他債權投資信用減值準備
（5）現金流量套期儲備
（6）外幣財務報表折算差額	-35,633,244.88	4,815,700.73
（7）其他
（二）歸屬於少數股東的其他綜合收益的稅後淨額	370,744.07	-2,314,093.99
七、綜合收益總額	815,960,208.40	987,599,273.19
（一）歸屬於母公司所有者的綜合收益總額	776,025,940.89	946,683,888.62
（二）歸屬於少數股東的綜合收益總額	39,934,267.51	40,915,384.57
八、每股收益：
（一）基本每股收益(元/股)	0.11	0.13
（二）稀釋每股收益(元/股)	0.11	0.13
