# Supplementary material
Source: ML conference proceedings conference paper supplement (https://openreview.net/forum?id=xg0fmtqh8d)
Supplement: supplementary_material [file 420_中国银行:2024年第一季度报告.xlsx]

## Sheet: Sheet
項目	2024年1-3月		本報告期比上年同期增減(%)
營業收入	161,038		-3.12
稅後利潤	59,973		-2.84
本行股東應享稅後利潤	55,989		-2.90
經營活動產生的現金流量淨額	3,240		-99.34
基本和稀釋每股收益(人民幣元)	0.18		-3.01
加權平均淨資產收益率(%,年化)	9.86		下降1.28個百分點
項目	2024年3月31日	2023年12月31日	本報告期末比上年度末增減(%)
資產總計	33,659,046	32,432,166	3.78
本行股東應享權益合計	2,653,487	2,629,510	0.91
