# Supplementary material
Source: ML conference proceedings conference paper supplement (https://openreview.net/forum?id=xg0fmtqh8d)
Supplement: supplementary_material [file 421_凯盛新能:2023环境、社会与管治报告.xlsx]

## Sheet: Sheet
凱盛新能、本公司、公司、我們	指	凱盛新能源股份有限公司
合肥新能源	指	中建材(合肥)新能源有限公司
桐城新能源	指	中國建材桐城新能源材料有限公司
宜興新能源	指	中建材(宜興)新能源有限公司
洛陽新能源	指	中建材(洛陽)新能源有限公司
北方玻璃	指	秦皇島北方玻璃有限公司
自貢新能源	指	凱盛(自貢)新能源有限公司
漳州新能源	指	凱盛(漳州)新能源有限公司
蚌埠中顯	指	蚌埠中建材信息顯示材料有限公司
龍玻	指	洛玻集團龍門玻璃有限責任公司
龍海	指	洛玻集團洛陽龍海電子玻璃有限公司
濮陽光材	指	中建材(濮陽)光電材料有限公司
