# Supplementary material
Source: ML conference proceedings conference paper supplement (https://openreview.net/forum?id=xg0fmtqh8d)
Supplement: supplementary_material [file 422_中远海控:2023年可持续发展报告.xlsx]

## Sheet: Sheet
氣候變化風險識別
風險類別		風險名稱	風險描述	應對舉措	潛在財務影響
實體風險	急性風險	洪水(包括暴雨、河水溢流）	1.暴雨和洪水破壞港口基礎設施及相關設施、船隻，設備設施斷電，需要人員撤離，導致營運中斷和資產損失 2.低能見度以及突然升高的水位和水速導致船閘和船隻機動性下降，影響航道的航行限制和船隻停泊 3.極端降水可能導致驟發洪水，影響連接內陸道路、鐵路和碼頭以及內河航道網絡的營運，阻礙正常業務營運 4.船舶、船員和貨物安全受到影響，導致延遲裝運和貨物受損索賠	1.制定應急預案 2.開展防颱防汛應急演練 3.防抗台設備保障 4.制定安全檢查制度，開展定期巡檢 5.加強氣象監控與預警 6.定期更新防颱防汛指導意見7.加強船岸聯繫以保證防颱防汛工作順利進行	現有資產核銷和提前報廢造成運輸困難營運成本提高
		強風/氣旋	1.強風預報難度大，破壞船舶基礎設施及相關設施、貨船或貨物，導致營運持續中斷和資產損失 2.強風或氣旋影響船隻航行速度及方向以致船隻偏離/更改航道或延誤，亦會妨礙船隻停泊，無法準時抵達和靠泊港口，造成集裝箱運輸無法按時交付，增加營運成本和收入影響。對於港口方而言，強風、氣旋導致的船舶延遲到達將增大流量管理壓力，造成營運成本增加 3.極端天氣將造成人員安全及健康受到威脅，在強風/氣旋條件下，員工工作時間及條件將受到嚴格控制，導致營運效率受影響，增加營運成本 4.如果船舶遇到颱風/氣旋/風暴，由於大浪和風暴，有一定的沉沒可能性，導致盈利損失 5.在台風的高風速情況下港口起重機進行正常加載/卸載作業無法進行而導致營運中斷，造成盈利損失		現有資產核銷和提前報廢造成運輸困難營運成本提高
	慢性風險	海洋酸化海洋温度上升	1.海水温度上升和海洋酸化加快船體的腐蝕速率，因此需採用抗腐蝕能力更高的物料，並支付較高的維護成本 2.海水温度上升和海洋酸化加快港口基建浸沒於海水部分和相關基礎設施及設施的腐蝕速率，因此港口相關基建設施需採用抗腐蝕能力更高的物料，並支付較高的維護成本	開展多項節能減碳綠色舉措，助力全球氣温上升幅度在1.5℃內： 1.落實航運節油舉措，減少航運過程碳排放 2.接入岸電，打造港口綠色營運 3.嘗試使用生物燃料，減少航運燃油排放	增加維護成本
		海平面上升	1.海平面上升導致風浪變化，影響航運公司的航行時間表 2.潮汐變化影響航道的沉積以降低航道的通暢度，需進行疏浚工程，營運成本上升 3.如果水面上升，一些處於低海平面地區的港口可能會下沉，將無法再使用這些港口從而不得不改變航行路線，增加營運成本	1.及時跟蹤並預測海平面上升情況 2.潮汐變化影響航道的沉積以降低航道的通暢度，需進行疏浚工程，營運成本上升 3.如果水面上升，一些處於低海平面地區的港口可能會下沉，將無法再使用這些港口，將不得不改變航行路線，增加營運成本	影響勞動力管理和規劃營運成本提高
轉型風險	政策與法律	現有產品和服務的要求與監管	1.2023年7月，國際海事組織於MEPC80會議對船舶温室氣體減排初步戰略目標進行了修訂，要求國際航運業温室氣體年度排放總量在2050年或前後實現淨零排放 2.中國政府不斷推動綠色航運，支持航運業的低碳轉型，強化對企業的能源使用要求 3.航運業將被納入歐盟排放交易系統，企業須監測、報告和核查二氧化碳排放	1.制定温室氣體排放目標，承諾2050滿足IMO船舶淨零排放標準 2.持續披露温室氣體排放 3.開展多項節能降耗舉措：航行過程管控、岸電改造 4.嘗試使用生物柴油並分析其成本可行性	增加營運和維護成本
		實施碳定價機制	1.航運業將被納入歐盟碳排放交易系統，企業需為船舶產生的二氧化碳付費 2.中國已開放全國碳交易市場，未來將會把航運業納入碳交易範圍	1.開展多項節能減碳舉措，減少營運過程產生的碳排放2.對營運過程中產生的碳排放進行持續追蹤和管理	增加營運成本
		強化排放量報告義務	1.IMO新規增加DCS（數據收集系統）安裝要求和數據披露要求（須披露實際油耗數據，以及其他指定數據）,若不符合規定，可能會被禁止航行 2.航運業將被納入歐盟排放交易系統，企業須監測、報告和核查二氧化碳排放	1.持續披露温室氣體排放 2.建立嚴密的船舶動態監控系統，對船舶航運過程中的油耗跟蹤，並披露相關數據	增加營運成本
	市場	客戶行為變化	1.客戶對集裝箱運輸業務提出減少碳排放的相關要求，若無法滿足客戶的節能減碳目標，導致訂艙減少或船舶閒置，增加營運成本。公司應當了解這些風險，並積極與客戶交流，明確客戶的需求，進而確保公司仍然可以為客戶提供靈活的端到端物流服務 2.間接（經營）費用增加：客戶對低碳服務、綠色運輸的需求增加會加速制定向碳中和過渡的戰略，增加研發費用	1.開展多項航運節油舉措 2.接入岸電，並建設綠色低碳碼頭 3.為客戶提供HiEco綠色航運低碳服務 4.提供碳排放計算器，供客戶計算海運過程中的碳排放	客戶偏好轉變導致商品和服務需求量下降
		燃料油成本上漲	1.油價提高，增加營運成本 2.低硫油市場價格波動大，將會影響營運成本 3.投入使用其他能源使得營運成本增加	1.安裝脫硫裝置，降低普通燃油硫化物的排放 2.接入岸電，降低船舶對燃料油的消耗	原料價格變化導致生產成本提高
	聲譽	客戶偏好轉變	1.客戶對集裝箱運輸業務提出減少碳排放的相關要求，若無法滿足客戶的節能減碳目標，導致訂艙減少或船舶閒置，增加營運成本 2.若不能在節能降耗等可持續發展表現方面達到客戶要求，成為行業的低碳引領者，那麼原有的客戶可能會轉而與公司的競爭對手合作。公司客戶流失，進而帶來收入減少的影響	1.開展多項航運節油舉措 2.接入岸電，並建設綠色低碳碼頭 3.為客戶提供HiEco綠色航運低碳服務 4.提供碳排放計算器，供客戶計算海運過程中的碳排放	商品/服務需求量下降
		利益相關方對負面回饋日益關切	1.若環境績效和披露不充分，那麼投資者和客戶可能會選擇公司的競爭對手，導致公司的收入減少 2.投資者對公司在新能源/可再生能源的使用方面提出要求3.客戶和投資者對環保表現越來越感興趣。如果不遵守IMO規定，那麼可能會失去合同和投資	1.積極披露本集團環境表現 2.開展多項節能減碳舉措，致力於向客戶提供綠色航運服務 3.嘗試使用生物柴油代替傳統燃油，探索可再生能源在航運業的應用前景	商品/服務需求減少
