# Supplementary material
Source: ML conference proceedings conference paper supplement (https://openreview.net/forum?id=xg0fmtqh8d)
Supplement: supplementary_material [file 423_测绘股份:300826测绘股份投资者关系管理信息20240325.xlsx]

## Sheet: Sheet
投资者关系活动类别	☑特定对象调研 □分析师会议 □媒体采访 □业绩说明会 □新闻发布会 □路演活动 □现场参观 □其他
参与单位名称及人员姓名	光大保德信基金、长江证券
时间	2024年3月22日
地点/方式	公司会议室/现场调研
上市公司接待人员姓名	董事会秘书：陈翀证券事务代表：吴子刚
投资者关系活动主要内容介绍	一、总体情况介绍 公司2020年4月在深圳证券交易所上市，上市3年来，公司作为专业的地理信息技术服务提供商，主营业务聚焦地理信息领域，主要利用时空信息的现代专业测勘方法、先进的数据处理技术以及信息化技术，为建设工程、城市精细化及智能化管理、空间位置信息的行业应用提供包括地理信息数据采集、加工处理、集成服务等在内的专业技术服务。 二、问答环节 1.公司采用何种商业模式？业务上有设备方面的需求吗？ 答：公司的客户群体主要围绕政府部门、事业单位和国企，参与相关的招投标获取项目订单，或者由业主直接进行项目委托。 公司在进行地理信息数据采集时需要用到硬件设备，现在主要依靠无人机、无人船、激光雷达、航测卫星等专业设备工具进行数据采集，人工采集方式的占比已逐步降低，测勘数据采集效率和规模都有较大提高。 2.公司是否有数据产品？数据产权归属于谁？ 答：目前，公司已在数据产品方面做出了实质性尝试。2023…
附件清单（如有）	无
日期	2024 年 3 月 22 日
