# Supplementary material
Source: ML conference proceedings conference paper supplement (https://openreview.net/forum?id=xg0fmtqh8d)
Supplement: supplementary_material [file 424_德明利:深圳市德明利技术股份有限公司向特定对象发行股票并在主板上市募集说明书(修订稿).xlsx]

## Sheet: Sheet
序号	芯片型号	投片成功时间	芯片名称	芯片特点
1	TW2985	2024年	SD6.0存储卡主控芯片	TW2985主要基于40nm工艺，提升读写性能，基于multi-voltage多电源域的低功耗设计方法，采用业界领先的UBER1e-15级别的4KLDPC纠错算法，采用软判决和硬判决相结合的先进方法，应对未来3-5年144/176层及200层以上需要高纠错能力的3DTLC/QLC闪存解决方案。
2	TW2983	2021年	SD5.1存储卡控制芯片	TW2983是一款可兼容SD5.1接口协议、55nm工艺制程的存储卡控制芯片，其在已量产的TW2981基础上，大幅提升了randomread/writeIOPS的性能，优化了powermanage模块，改善了对车载行车记录仪和监控等设备的兼容性，进一步优化闪存管理算法，支持最新的128/144层3DTLC/QLCFlash，特别是支持国产长江存储32/64/128层3DTLC/QLC等闪存。
3	TW2981	2020年	SD3.0/4.0/5.0存储卡控制芯片	TW2981是一款兼容SD3.0/4.0/5.0接口协议、55nm工艺制程的存储卡控制芯片，与闪存搭配可以制作SD等各类型存储卡。它能提供高性能的数据传输，内置ECC纠错算法，加速算法专用协处理器，闪存管理算法等，从而能够广泛的支持市面上的三星电子，铠侠、海力士/英特尔、闪迪等各家存储原厂2x、1xnm等制程的SLC/MLC/TLC2D闪存以及32/64/72/96层等3DMLC/TLC/QLC闪存。该芯片内置2.5V/1.8V/1.2V电源管理。
4	TW2980	2018年	SD3.0存储卡控制芯片	TW2980是一款兼容SD3.0接口协议、110nm工艺制程的存储卡控制芯片，与闪存搭配可以制作SD等各类型存储卡。它能提供高性能的数据传输，内置ECC纠错算法，加速算法专用协处理器，闪存管理算法等，从而能够广泛的支持市面上的三星电子、铠侠、海力士/英特尔、闪迪等各家存储原厂2x、1xnm等制程的SLC/MLC/TLC2D闪存以及32/64/72/96层等3DMLC/TLC闪存。该芯片内置OTP存储器，可用于存放密钥等加密相关数据，制作可靠的加密存储卡，也可用于存放关键参数、程序代码等，从而提高存储卡的稳定性和使用寿命。该芯片内置1.8V/1.2V电源管理。
5	TW9080	2017年	NOR存储器控制芯片	TW9080是一款支持NORFlash存储器的存储卡控制芯片，与NOR型闪存存储器搭配可以制作用于广告推广、登录认证、预录内容的存储卡。该芯片内置特有的针对NOR闪存的ECC纠错算法和闪存管理算法，支持市面上主流的三星电子、台湾旺宏等厂家的NOR闪存，该芯片内置1.8V/1.2V电源管理。
6	TW2880	2016年	SD2.0存储卡控制芯片	TW2880是一款兼容SD2.0/1.1接口协议、110nm工艺制程的存储卡控制芯片，与闪存搭配可以制作SD等各类型存储卡。该芯片内置ECC纠错算法，闪存管理算法等，从而支持市面上的三星电子、铠侠、海力士/英特尔、闪迪等各家存储原厂2x、1xnm等制程的SLC/MLC/TLC2D闪存，该芯片内置1.8V/1.2V电源管理。
