# Supplementary material
Source: ML conference proceedings conference paper supplement (https://openreview.net/forum?id=xg0fmtqh8d)
Supplement: supplementary_material [file 425_德明利:深圳市德明利技术股份有限公司向特定对象发行股票并在主板上市募集说明书(修订稿).xlsx]

## Sheet: Sheet
产品分类	图示	具体产品	应用领域
固态硬盘		移动固态硬盘	数据备份
		SATA3HalfslimSSD	工控系统、医疗设备、POS
		SATA3mSATASSD	工控系统、医疗设备、POS
		SATA32.5-inchSSD	台式电脑、笔记本、Chromebook、游戏设备、POS、广告显示屏、工业电脑、NVR（网络视频录像机）、NAS（网络附属存储器）
		SATA3M.2SSD	台式电脑、笔记本、Chromebook、游戏设备、网通设备、工业电脑、工业平板、医疗设备、广告机
		PCIeGen3x4M.2SSD	台式电脑、笔记本、Chromebook、游戏设备、POS机，广告显示屏、网络通信、数据中心
		PCIeGen4x4M.2SSD	台式电脑、笔记本、Chromebook、游戏设备、POS机，广告显示屏
		PCIeGen3x4U.2SSD	网络通信、数据中心
嵌入式存储		UFS	5G手机、高端平板
		eMMC	智能显示、机顶盒、投影仪、行车记录仪、流媒体后视镜、智能家居、车机
移动存储		USBDRIVE存储U盘	监控设备、电脑、平板消费级场景等
		USB模块	手机、车载应用、中控导航、无人机、相机、监控设备、视频播放器、数据备份、灾备盒、部标机
		SD卡
内存条		DDR5/4/3UDIMMDDR5/4/3SODIMM	台式电脑、笔记本电脑、mini主机、ops主机、工业电脑、工业平板、游戏设备、网安设备、广告机、POS机
