# Supplementary material
Source: ML conference proceedings conference paper supplement (https://openreview.net/forum?id=xg0fmtqh8d)
Supplement: supplementary_material [file 426_德明利:深圳市德明利技术股份有限公司向特定对象发行股票并在主板上市募集说明书(修订稿).xlsx]

## Sheet: Sheet
项目	2024/6/30		2023/12/31		2022/12/31		2021/12/31
	账面价值	占比	账面价值	占比	账面价值	占比	账面价值	占比
机器设备	4,127.33	40.61%	1,559.83	36.07%	664.10	20.26%	630.86	22.53%
电子及其他设备	5,810.39	57.16%	2,540.39	58.75%	2,585.05	78.88%	2,116.81	75.60%
运输设备	226.80	2.23%	223.90	5.18%	27.96	0.85%	52.37	1.87%
合计	10,164.52	100.00%	4,324.13	100.00%	3,277.11	100.00%	2,800.04	100.00%
