# Supplementary material
Source: ML conference proceedings conference paper supplement (https://openreview.net/forum?id=xg0fmtqh8d)
Supplement: supplementary_material [file 427_甘肃能源:关于控股股东非公开发行可交换公司债券换股进展暨权益变动比例超过1%的公告.xlsx]

## Sheet: Sheet
股份种类（A股、B股等）	可交换公司债券换股数（万股）	可交换公司债券换股比例（%）
A股	1,601.0072	1.00
合计	1,601.0072	1.00
本次权益变动方式（可多选）	通过证券交易所的集中交易□ 通过证券交易所的大宗交易□ 其他（信息披露义务人可交换公司债券换股导致持股比例下降）
本次增持股份的资金来源（可多选）	自有资金□ 银行贷款□ 其他金融机构借款□ 股东投资款□ 其他□（请注明） 不涉及资金来源
