# Supplementary material
Source: ML conference proceedings conference paper supplement (https://openreview.net/forum?id=xg0fmtqh8d)
Supplement: supplementary_material [file 428_中国太保:海外监管公告-偿付能力季度报告摘要节录(中国太平洋人寿保险股份有限公司)(2024年第2季度).xlsx]

## Sheet: Sheet
指標名稱	本季度(末)數	本年累計數
保險業務收入(萬元)	6,147,317	15,315,949
淨利潤(萬元)	1,046,144	2,005,508
總資產(萬元)	220,306,560	220,306,560
淨資產(萬元)	15,014,301	15,014,301
保險合同負債(萬元)	194,330,563	194,330,563
基本每股收益(元)	1.21	2.32
淨資產收益率(%)	7.36%	14.35%
總資產收益率(%)	0.49%	0.95%
投資收益率(%)	0.76%	1.04%
綜合投資收益率(%)	2.32%	4.00%
