# Supplementary material
Source: ML conference proceedings conference paper supplement (https://openreview.net/forum?id=xg0fmtqh8d)
Supplement: supplementary_material [file 429_德明利:深圳市德明利技术股份有限公司向特定对象发行股票并在主板上市募集说明书(修订稿).xlsx]

## Sheet: Sheet
公司名称	产品名称	2024年1-6月	2023年度	2022年度	2021年度
佰维存储	嵌入式存储	24.13%	-8.30%	17.10%	18.98%
江波龙	固态硬盘	23.51%	5.46%	-0.10%	12.37%
	嵌入式存储		3.11%	15.38%	24.28%
公司	固态硬盘模组	26.11%	14.83%	4.40%	19.23%
	嵌入式存储模组	24.83%	7.48%	12.97%	-
