# Supplementary material
Source: ML conference proceedings conference paper supplement (https://openreview.net/forum?id=xg0fmtqh8d)
Supplement: supplementary_material [file 430_德明利:深圳市德明利技术股份有限公司向特定对象发行股票并在主板上市募集说明书(修订稿).xlsx]

## Sheet: Sheet
序号	研发项目	所处阶段及进展情况	拟达到目标	项目拟达到技术水平与行业水平比较
1	基于先进工艺的高性能低功耗SD存储卡控制芯片研发（55nm）	已结项，并实现量产	（1）grossdie达到30000颗左右； （2）支持SD3.0/5.0接口，支持V30速度等级，顺序读速度高达80MB/s； （3）支持3.3V/1.8V/1.2V闪存，支持2.5VVCC； （4）支持MLC/TLC/QLCNAND闪存； （5）支持2plane，4plane等闪存加速操作； （6）整个芯片静态功耗低至100uA。	达到行业先进水平
2	基于先进制程高性能低功耗USB2.0存储盘控制芯片（40nm）	已结项，并实现量产	（1）跟竞争对手产品完全兼容； （2）采用40nm工艺,Grossdie50000以上； （3）支持最新的64、72、96层3DTLC/MLC/QLC； （4）单plane性能达到C10速度等级。	达到行业先进水平
3	基于先进制程高性能低功耗USB3.0存储盘控制芯片（40nm）	已结项，并实现量产	（1）跟竞争对手产品完全兼容； （2）采用40nm工艺； （3）支持最新的64、72、96层3DSLC/TLC/MLC/QLC； （4）最高读取速度可达250MB，集成单路DC_DC降压模组，集成3路可调稳压电源模组； （5）最高支持8片die，最高可以支持1TB； （6）集成TYPE-C控制器。	达到行业先进水平
4	支持LDPC和高并发优化的IOPS功能的SD存储控制芯片（40nm）	完成MPW芯片回片验证；量产版芯片流片	（1）支持V30速度等级，顺序读速度高达95MB/s； （2）IOPS达到2000，支持A1速度等级； （3）支持ONFI3.2接口协议； （4）灵活的支持5ALE,6ALE不同配置； （5）支持UBER1e-15级别的4KLDPC纠错算法，软判决和硬判决相结合的方式； （6）支持最新的144/176/2xx层TLC/QLC3DNAND，包括国产长江存储的3DTLC/QLC。	达到行业先进水平
5	基于SATA接口的固态存储阵列硬盘控制芯片（28nm）	完成MPW芯片回片验证	（1）支持SATA3.2； （2）支持4KLDPC纠错； （3）支持ONFI5.0闪存IO协议； （4）支持1.2/1.8V闪存IO电压； （5）支持TLC/QLC闪存颗粒； （6）支持最高4TBSSD容量； （7）采用RISC-VCPU架构； （8）采用28nm工艺。	达到行业先进水平
6	eMMC5.1加LDPC纠正编译码的存储控制芯片技术（28nm）	技术验证阶段	（1）支持JEDECeMMC5.1标准； （2）采用ARM32-bitRISCCPU架构； （3）支持LDPC纠错算法； （4）支持HS400模式及最高200MHz时钟频率； （5）支持ONFI3.0闪存IO协议； （6）支持Toggle2.0闪存IO协议； （7）支持1.2/1.8V闪存IO电压。	达到行业先进水平
7	DDR内存条项目	系统/模块设计阶段	（1）支持JEDECDDR5SDRAM标准； （2）支持时序参数扩展到8200Mbps； （3）支持最高48GB容量； （4）支持CAMM2协议的内存模组； （5）支持ECCDDR4内存模组； （6）支持DDR5颗粒OC前期验证； （7）支持主流国产CPU架构（信创）。	达到行业
8	PCIeSSD项目	系统/模块设计阶段	（1）支持PCIe4.0； （2）支持NVMe2.0； （3）支持国密； （4）支持4KLDPC纠错； （5）支持ONFI5.1闪存IO协议； （6）兼容CTT/LTT； （7）支持TLC/QLC闪存颗粒； （8）支持最高8TBSSD容量； （9）采用RISC-VCPU架构； （10）采用12nm工艺。	达到行业先进水平
9	嵌入式存储项目-UFS	系统/模块设计阶段	（1）支持UFS4.0； （2）支持G5/2Lane； （3）支持国密； （4）支持4KLDPC纠错； （5）支持ONFI5.1闪存IO协议； （6）兼容CTT/LTT； （7）支持TLC/QLC闪存颗粒； （8）支持最高1TB容量； （9）采用RISC-VCPU架构； （10）采用7nm工艺。	达到行业先进水平
10	嵌入式存储项目-eMMC	系统/模块设计阶段	（1）支持eMMC5.1； （2）支持RAID； （3）支持国密； （4）支持4KLDPC纠错； （5）支持ONFI5.0闪存IO协议； （6）兼容CTT/LTT； （7）支持TLC/QLC闪存颗粒； （8）支持最高256GB容量； （9）采用RISC-VCPU架构； （10）采用28nm工艺。	达到行业先进水平
