# Supplementary material
Source: ML conference proceedings conference paper supplement (https://openreview.net/forum?id=xg0fmtqh8d)
Supplement: supplementary_material [file 431_德明利:深圳市德明利技术股份有限公司向特定对象发行股票并在主板上市募集说明书(修订稿).xlsx]

## Sheet: Sheet
序号	名称	类型	著作权人	有效期限	取得方式	登记号
1	德名利U盘主控量产分区加密软件V2.06	计算机软件	发行人	2009.10.20-2059.12.31	原始取得	2010SR074878
2	TW8070闪存控制存储产品量产软件[简称：TW8070-MP-Tool]V1.0	计算机软件	发行人	2014.03.01-2064.12.31	原始取得	2016SR172433
3	TW8090闪存控制存储产品量产软件[简称：TW8090-MP-Tool]V1.0	计算机软件	发行人	2014.09.28-2064.12.31	原始取得	2016SR172523
4	高速存储模组引导软件V1.0	计算机软件	发行人	2015.07.01-2065.12.31	原始取得	2016SR172086
5	智能安全存储模组引导程序软件V1.0	计算机软件	发行人	2015.08.30-2065.12.31	原始取得	2016SR172428
6	TW2880用户修改设备工作参数工具软件[简称：TW2880用户工具]V1.1	计算机软件	发行人	2015.11.25-2065.12.31	原始取得	2016SR172526
7	配置量产闪存支持信息软件[简称：CPIS]V1.029	计算机软件	发行人	2015.11.25-2065.12.31	原始取得	2016SR171812
8	文件拷贝对比软件V1.00	计算机软件	发行人	2016.08.15-2066.12.31	原始取得	2017SR618109
9	量产工具配套验证码生成软件V1.0	计算机软件	发行人	2017.08.25-2067.12.31	原始取得	2017SR617887
10	量产工具固件配套函数头文件生产软件V1.0	计算机软件	发行人	2017.01.25-2067.12.31	原始取得	2017SR617547
11	非易失电可编程序只读存储模组引导程序软件V1.0	计算机软件	发行人	2017.08.25-2067.12.31	原始取得	2017SR617552
12	德名利量产工具配套高级格式化功能模块软件V1.0	计算机软件	发行人	2018.07.01-2068.12.31	原始取得	2018SR701794
13	功能盘解密功能配套软件[简称：DisplayDisk]V1.0	计算机软件	发行人	2018.07.01-2068.12.31	原始取得	2019SR1164618
14	德名利量产工具配套功能盘实现模块软件V1.0	计算机软件	发行人	2018.08.10-2068.12.31	原始取得	2019SR0411772
15	量产工具配套快速扩展格式化功能模块V1.0	计算机软件	发行人	2018.08.20-2068.12.31	原始取得	2018SR852958
16	德名利量产工具配套高级镜像文件写入功能模块软件V1.0	计算机软件	发行人	未发表	原始取得	2018SR1006844
17	量产工具配套序列号格式化功能模块软件V1.0	计算机软件	发行人	未发表	原始取得	2019SR0056475
18	特定错误类型Log分析软件V1.0	计算机软件	发行人	2021.06.19-2071.12.31	原始取得	2021SR1310689
19	量产闪存失败信息软件V1.0	计算机软件	发行人	2021.07.02-2071.12.31	原始取得	2021SR1314733
20	激光码解码软件V1.0	计算机软件	发行人	2021.07.05-2071.12.31	原始取得	2021SR1446399
21	底层数据转码显示软件V1.0	计算机软件	发行人	2021.06.02-2071.12.31	原始取得	2021SR1893183
22	INI初始化文件编辑软件V1.0	计算机软件	发行人	2021.11.24-2071.12.31	原始取得	2022SR0084042
23	移动存储设备数据写读速度监测软件V1.0	计算机软件	发行人	未发表	原始取得	2022SR0156591
24	专用开卡电路板电流检测软件V1.0	计算机软件	发行人	未发表	原始取得	2022SR0156592
25	行车记录仪数据记录模拟测试软件V1.0	计算机软件	发行人	未发表	原始取得	2022SR0156593
26	行车记录仪日志信息筛选软件V1.0	计算机软件	发行人	未发表	原始取得	2022SR0156594
27	模拟测试预设项目流程测试软件V1.0	计算机软件	发行人	未发表	原始取得	2022SR0156619
28	文件数据对比显示软件V1.0	计算机软件	发行人	2022.01.20-2072.12.31	原始取得	2022SR0482462
29	文件拷贝测速软件V1.0	计算机软件	发行人	2022.05.19-2072.12.31	原始取得	2022SR1087312
30	项目配置文件对比显示软件 V1.0	计算机软件	发行人	2022.05.20-2072.12.31	原始取得	2022SR1102574
31	文件夹对比软件	计算机软件	发行人	2022.07.19-2072.12.31	原始取得	2022SR1428029
32	FPGA Commander 软件	计算机软件	发行人	2022.06.30-2072.12.31	原始取得	2022SR1575250
33	SuperSpeed 测试集软件	计算机软件	发行人	2022.09.09-2072.12.31	原始取得	2023SR0084621
34	颗粒数据随机度分析软件	计算机软件	发行人	未发表	原始取得	2023SR0084623
35	SSD 固件自动化测试软件	计算机软件	发行人	未发表	原始取得	2023SR0177283
36	基于 SATA 协议测试系统	计算机软件	发行人	未发表	原始取得	2023SR0303171
37	NandFlash 误码率统计软件	计算机软件	发行人	2022.09.20-2072.12.31	原始取得	2023SR0443754
38	SPI 信息读写软件	计算机软件	发行人	2023.02.20-2073.12.31	原始取得	2023SR0684158
39	具易扩展性功能命令定义及安全传输协议软件	计算机软件	发行人	未发表	原始取得	2023SR0834283
40	CopyTest 循环拷贝断电上电校验测试软件[简称：CopyTest]V1.0	计算机软件	发行人	未发表	原始取得	2023SR1057121
41	FormatTool_H2 软件 V1.0	计算机软件	发行人	2023.06.15-2073.12.31	原始取得	2023SR1056908
42	NandFlash 分析软件 V1.0	计算机软件	发行人	2023.06.16-2073.12.31	原始取得	2023SR1055832
43	量产工具版本管理软件 V1.0	计算机软件	发行人	未发表	原始取得	2023SR1055385
44	模拟行车记录仪写读 TF 卡软件 V1.0	计算机软件	发行人	2023.05.20-2073.12.31	原始取得	2023SR1057035
45	HMDia 软件	计算机软件	发行人	未发表	原始取得	2023SR1506920
46	品质筛选软件 V1.0	计算机软件	发行人	2024.02.20-2074.12.31	原始取得	2024SR0545985
47	16 进制字符互转数值软件 V1.0	计算机软件	发行人	2024.03.01-2074.12.31	原始取得	2024SR0597512
48	结构体分析软件 V1.0	计算机软件	发行人	2023.02.15-2073.12.31	原始取得	2024SR0623503
49	自动化测试软件 V1.0	计算机软件	发行人	2024.03.20-2074.12.31	原始取得	2024SR0774814
