# Supplementary material
Source: ML conference proceedings conference paper supplement (https://openreview.net/forum?id=xg0fmtqh8d)
Supplement: supplementary_material [file 432_葵花药业:关于使用闲置自有资金进行现金管理的进展公告.xlsx]

## Sheet: Sheet
序号	签约机构	产品名称	产品类型	金额(万元)	起止日期	资金来源	是否已赎回	实现收益(万元)
1	兴业银行哈尔滨松北支行	兴银理财金雪球稳利【1】号【B】款净值型理财产品	非保本浮动收益型	10,000.00	2023.05.22-2023.11.22	闲置自有资金	是	147.82
2	招商银行哈尔滨平房支行	招银理财招睿日开7天滚动持有3号固定收益类理财计划	固定收益类非保本浮动收益型	10,000.00	2023.05.22-2023.12.15	闲置自有资金	是	87.70
3	中国银行哈尔滨香坊支行	（机构专属）中银理财-稳享(封闭式)2023041	固定收益类非保本浮动收益型	60,000.00	2023.05.23-2024.03.27	闲置自有资金	是	1,593.72
4	中国银行哈尔滨香坊支行	挂钩型结构性存款CSDVY202334108	保本保最低收益型	400.00	2023.05.23-2023.09.27	闲置自有资金	是	1.95（含税）
5	中国银行哈尔滨香坊支行	挂钩型结构性存款CSDVY202334108	保本保最低收益型	4,500.00	2023.05.23-2023.09.27	闲置自有资金	是	21.92（含税）
6	中国银行哈尔滨香坊支行	挂钩型结构性存款CSDVY202334109	保本保最低收益型	5,100.00	2023.05.23-2023.09.28	闲置自有资金	是	73.34（含税）
7	中国银行哈尔滨香坊支行	挂钩型结构性存款CSDVY202334110	保本保最低收益型	5,000.00	2023.05.23-2023.10.26	闲置自有资金	是	29.92（含税）
8	中国银行哈尔滨香坊支行	挂钩型结构性存款CSDVY202334110	保本保最低收益型	5,100.00	2023.05.23-2023.10.26	闲置自有资金	是	30.52（含税）
9	中国银行哈尔滨香坊支行	挂钩型结构性存款CSDVY202334111	保本保最低收益型	9,900.00	2023.05.23-2023.10.27	闲置自有资金	是	183.13（含税）
10	招商银行哈尔滨平房支行	招银理财招睿日开7天滚动持有3号固定收益类理财计划	固定收益类非保本浮动收益型	10,000.00	2023.07.21-2023.12.16	闲置自有资金	是	135.55
11	兴业银行哈尔滨松北支行	兴银理财金雪球悦享E款2023年第2期定期开放固收类理财产品	非保本开放式	10,000.00	2023.07.21-2023.11.01	闲置自有资金	是	88.07
12	中国银行哈尔滨香坊支行	（机构专属）中银理财“稳享”（封闭式）2023年82期	固定收益类非保本浮动收益型	20,000.00	2023.09.05-2024.03.07	闲置自有资金	是	314.00
13	兴业银行哈尔滨松北支行	兴银理财稳利悦享A款2023年第9期封闭式固收类理财产品	固定收益类非保本浮动收益型	20,000.00	2023.11.09-2024.02.21	闲置自有资金	是	174.00
14	中国银行哈尔滨香坊支行	（机构专属）中银理财“睿享”（封闭式）2023年95期	固定收益类非保本浮动收益型	30,000.00	2023.12.20-2024.04.22	闲置自有资金	是	300.66
15	上海浦东发展银行哈尔滨分行营业部	利多多公司稳利24JG3305期（月月滚利2期特供款）	保本浮动收益型	100,000.00	2024.06.03-2024.06.28	闲置自有资金	是	166.67（含税）
16	上海浦东发展银行哈尔滨分行营业部	单位“省心存”存款	定期存款	20,000.00	2024.06.03-2024.09.03	闲置自有资金	是	82.50（含税）
17	招商银行哈尔滨平房支行	组合存款	定期存款	10,000.00	2024.06.03-2024.08.30	闲置自有资金	是	41.25(含税）
18	中国银行哈尔滨香坊支行	中银平稳理财计划-智荟系列241187期	固定收益类非保本浮动收益型	30,000.00	2024.06.04-2024.09.25	闲置自有资金	是	204.33
19	兴业银行哈尔滨松北支行	兴银理财聚利封闭式第269期固收类理财产品	固定收益类、非保本浮动收益	20,000.00	2024.06.13-2025.03.13	闲置自有资金	否
20	上海浦东发展银行哈尔滨分行营业部	利多多公司稳利24JG3359期(礼财日B款)人民币对公结构性存款	保本浮动收益型	20,000.00	2024.07.08-2024.07.31	闲置自有资金	是	30.67（含税）
21	上海浦东发展银行哈尔滨分行营业部	利多多公司稳利24JG6066期(三层看涨)人民币对公结构性存款	保本浮动收益型	50,000.00	2024.07.08-2024.10.08	闲置自有资金	否
22	上海浦东发展银行哈尔滨分行营业部	利多多公司稳利24JG3447期(月月滚利6期特供款)人民币对公结构性存款	保本浮动收益型	30,000.00	2024.09.02-2024.09.30	闲置自有资金	否
23	中国银行哈尔滨香坊支行	挂钩型结构性存款（机构客户）【CSDPY20240565】	保本保最低收益型	30,000.00	2024.09.18-2024.10.23	闲置自有资金	否
