# Supplementary material
Source: ML conference proceedings conference paper supplement (https://openreview.net/forum?id=xg0fmtqh8d)
Supplement: supplementary_material [file 433_新希望:2024年9月生猪销售情况简报.xlsx]

## Sheet: Sheet
月份	生猪销售数量（万头）		生猪销售收入（亿元）		商品猪价格（元/公斤）
	当月	累计	当月	累计	当月
2023年9月	137.21	1,306.15	23.10	203.55	15.97
2023年10月	147.15	1,453.29	23.41	226.95	14.91
2023年11月	167.59	1,620.88	23.80	250.75	13.95
2023年12月	147.36	1,768.24	18.30	269.05	13.06
2024年1月	172.48	172.48	21.59	21.59	13.30
2024年2月	130.88	303.36	18.36	39.95	13.86
2024年3月	152.55	455.91	23.04	62.99	14.34
2024年4月	147.62	603.53	23.37	86.36	15.13
2024年5月	136.68	740.21	20.98	107.34	15.42
2024年6月	128.65	868.86	23.14	130.48	18.07
2024年7月	126.20	995.06	23.91	154.39	18.80
2024年8月	127.75	1,122.81	24.86	179.25	20.13
2024年9月	119.24	1,242.04	22.92	202.17	18.81
