# Supplementary material
Source: ML conference proceedings conference paper supplement (https://openreview.net/forum?id=xg0fmtqh8d)
Supplement: supplementary_material [file 434_维信诺:维信诺科技股份有限公司审阅报告.xlsx]

## Sheet: Sheet
出租方名称	租赁资产种类	简化处理的短期租赁和低价值资产租赁的租金费用（如适用）		未纳入租赁负债计量的可变租赁付款额（如适用）		支付的租金		承担的租赁负债利息支出		增加的使用权资产
		本期发生额	上期发生额	本期发生额	上期发生额	本期发生额	上期发生额	本期发生额	上期发生额	本期发生额	上期发生额
固安京御幸福房地产开发有限公司	房屋及建筑物	-	95,238.10	-	-	-	17,885,003.58	267,565.71	505,761.18	17,911,043.20	-
固安九通新盛园区建设发展有限公司	设备	-	-	1,380,816.31	2,598,423.86	1,520,397.00	2,822,810.40	-	-	-	-
合计		-	95,238.10	1,380,816.31	2,598,423.86	1,520,397.00	20,707,813.98	267,565.71	505,761.18	17,911,043.20	-
