# Supplementary material
Source: ML conference proceedings conference paper supplement (https://openreview.net/forum?id=xg0fmtqh8d)
Supplement: supplementary_material [file 435_维信诺:维信诺科技股份有限公司审阅报告.xlsx]

## Sheet: Sheet
项目	期末余额或本期发生额
	固安云谷	国显光电	合肥维信诺
流动资产	9,243,784,946.08	8,173,666,963.15	9,291,133,153.82
非流动资产	18,006,988,571.15	3,711,641,809.90	32,211,221,382.78
资产合计	27,250,773,517.23	11,885,308,773.05	41,502,354,536.60
流动负债	8,527,852,257.36	6,556,463,817.79	10,471,509,385.03
非流动负债	5,808,743,091.74	1,063,687,119.10	15,949,418,231.43
负债合计	14,336,595,349.10	7,620,150,936.89	26,420,927,616.46
营业收入	2,448,155,642.43	1,509,761,591.87	5,446,030,022.54
净利润	-1,135,089,598.21	-199,592,207.47	68,358,491.18
综合收益总额	-1,135,089,598.21	-199,614,067.14	68,358,491.18
经营活动现金流量	538,949,472.41	430,044,267.81	-421,765,094.48
