# Supplementary material
Source: ML conference proceedings conference paper supplement (https://openreview.net/forum?id=xg0fmtqh8d)
Supplement: supplementary_material [file 436_统一企业中国:2023企业社会责任报告.xlsx]

## Sheet: Sheet
排放物績效指標	2023	2022	2021
廢水(噸)	7,159,846	7,094,516	6,402,699
化學需氧量(噸)	481	473	426
氮氧化物(噸)	38	43	46
