# Supplementary material
Source: ML conference proceedings conference paper supplement (https://openreview.net/forum?id=xg0fmtqh8d)
Supplement: supplementary_material [file 437_中远海控:2023年可持续发展报告.xlsx]

## Sheet: Sheet
指標		單位	2021年	2022年	2023年
按培訓類別劃分的員工總培訓時數
反貪污及廉潔		小時	22,231	37,177	17,657
安全環保		小時	76,037	171,417	146,814
死亡總數	因工死亡人數	人	1	0	0
	因工死亡人數比例	‰	0.02	0	0
工傷情況	造成工傷的事故數量	件	72	118	87
	工傷人數	人	71	118	100
	千人工傷率	‰	1.71	2.73	2.58
因工傷損失工作日數	誤工總日數	天	1,295	2,886	2,049
供應商數目（按地區劃分）	中國大陸境內供應商	家	19,762	21,135	24,207
	中國大陸境外（包括港澳台地區）供應商	家	21,456	19,914	21,943
接獲關於產品及服務的投訴數目	投訴抱怨數目	件	630	514	249
	投訴處理比例	%	100	100	100
對公司或其僱員提出並已審結的貪污訴訟案件的數目		件	0	0	0
社區/公益活動投入總人次		人次	2,104	3,241	4,939
社區/公益活動人員參與總時數		小時	3,691	11,685	16,496
