# Supplementary material
Source: ML conference proceedings conference paper supplement (https://openreview.net/forum?id=xg0fmtqh8d)
Supplement: supplementary_material [file 438_中集集团:二零二三年度业绩公告(年度报告摘要).xlsx]

## Sheet: Sheet
項目	2023年	2022年	同比增減
經營活動現金流入小計	124,324,633	149,371,423	(16.77%)
經營活動現金流出小計	121,621,447	134,753,957	(9.75%)
經營活動產生的現金流量淨額	2,703,186	14,617,466	(81.51%)
投資活動現金流入小計	8,331,983	8,620,996	(3.35%)
投資活動現金流出小計	16,506,534	14,878,573	10.94%
投資活動使用的現金流量淨額	(8,174,551)	(6,257,577)	(30.63%)
籌資活動現金流入小計	41,953,092	15,571,183	169.43%
籌資活動現金流出小計	32,248,080	25,334,540	27.29%
籌資活動產生╱使用的現金流量淨額	9,705,012	(9,763,357)	199.40%
現金及現金等價物淨增加╱（減少）額	4,438,516	(617,688)	818.57%
