# Supplementary material
Source: ML conference proceedings conference paper supplement (https://openreview.net/forum?id=xg0fmtqh8d)
Supplement: supplementary_material [file 439_德明利:深圳市德明利技术股份有限公司向特定对象发行股票并在主板上市募集说明书(修订稿).xlsx]

## Sheet: Sheet
银行名称	账号	存入日期	初始存放金额1	2024年6月30日余额
广东华兴银行股份有限公司江门分行	808880100014870	2022/6/29	100,000,000.00	已注销
中国光大银行股份有限公司深圳熙龙湾支行	39180180806769800	2022/6/28	128,999,000.00	已注销
江苏银行股份有限公司深圳分行	19200188000757503	2022/6/29	50,000,000.00	已注销
交通银行股份有限公司深圳分行	443066285013005784685	2022/6/29	105,892,400.00	已注销
中国民生银行股份有限公司深圳分行	683000210	2022/6/29	50,000,000.00	已注销
中国银行股份有限公司深圳锦绣支行	771875919696	2022/6/29	50,000,000.00	已注销
合计			484,891,400.00
