# Supplementary material
Source: ML conference proceedings conference paper supplement (https://openreview.net/forum?id=xg0fmtqh8d)
Supplement: supplementary_material [file 440_维信诺:维信诺科技股份有限公司审阅报告.xlsx]

## Sheet: Sheet
项目	本期发生额	上期发生额
利润总额	-1,682,681,194.23	-5,513,385,674.02
按适用税率计算的所得税费用	-420,670,298.56	-1,378,346,418.51
子公司适用不同税率的影响	142,139,206.68	372,492,868.39
调整以前期间所得税的影响	-	2,786.67
加计扣除和减免所得税的影响	-118,203,972.41	-217,536,275.56
非应税收入的影响	-8,738,621.93	-1,122,991.84
不可抵扣的成本、费用和损失的影响	12,579,254.23	11,460,123.36
使用前期未确认递延所得税资产的可抵扣亏损的影响	-	-
本期未确认递延所得税资产的可抵扣暂时性差异或可抵扣亏损的影响	182,324,612.81	244,030,904.76
内部交易的影响	4,502,791.46	227,017,800.24
所得税费用	-206,067,027.72	-742,001,202.49
