# Supplementary material
Source: ML conference proceedings conference paper supplement (https://openreview.net/forum?id=xg0fmtqh8d)
Supplement: supplementary_material [file 441_维信诺:维信诺科技股份有限公司审阅报告.xlsx]

## Sheet: Sheet
类别	折旧年限（年）	残值率（%）	年折旧率（%）
房屋及建筑物	20-50	5	1.90-4.75
机器设备	8-10	5	9.5-11.88
厂务设备	12-20	5	4.75-7.92
运输设备	3-10	0-3	9.70-33.33
电子设备及其他	3-5	0-3	19.40-33.33
