# Supplementary material
Source: ML conference proceedings conference paper supplement (https://openreview.net/forum?id=xg0fmtqh8d)
Supplement: supplementary_material [file 442_中原银行:2023中原银行社会责任(ESG)报告.xlsx]

## Sheet: Sheet
層 面		描述	所在章節
A環境
層面A1：排放物	一般披露	有關廢氣及溫室氣體排放、向水及土地的排污、有害及無害廢棄物的產生等的政策；及遵守對發行人有重大影響的相關法律及規例的資料。	踐行低碳運營
	A1.1	排放物種類及相關排放數據。	踐行低碳運營
	A1.2	直接（範圍1）及能源間接（範圍2）溫室氣體排放量（以噸計算）及（如適用）密度（如以每產量為單位、每項設施計算）。	踐行低碳運營
	A1.3	所產生有害廢棄物總量（以噸計算）及（如適用）密度（如以每產量為單位、每項設施計算）。	踐行低碳運營
	A1.4	所產生無害廢棄物總量（以噸計算）及（如適用）密度（如以每產量為單位、每項設施計算）。	踐行低碳運營
	A1.5	描述所訂立的排放量目標及為達到這些目標所採取的步驟。	踐行低碳運營
	A1.6	描述處理有害及無害廢棄物的方法及描述所訂立的減廢目標及為達到這些目標所採取的步驟。	踐行低碳運營
層面A2：資源使用	一般披露	有效使用資源（包括能源、水及其他原材料）的政策。	踐行低碳運營
	A2.1	按類型劃分的直接及╱或間接能源（如電、氣或油）總耗量（以千個千瓦時計算）及密度（如以每產量單位、每項設施計算）。	踐行低碳運營
	A2.2	總耗水量及密度（如以每產量單位、每項設施計算）。	踐行低碳運營
	A2.3	描述所訂立的能源使用效益目標及為達到這些目標所採取的步驟。	踐行低碳運營
	A2.4	描述求取適用水源上可有任何問題，以及所訂立的用水效益目標及為達到這些目標所採取的步驟。	踐行低碳運營
	A2.5	製成品所用包裝材料的總量（以噸計算）及（如適用）每生產單位占量。	不適用
層面A3：環境及天然資源	一般披露	減低發行人對環境及天然資源造成重大影響的政策。	踐行低碳運營
	A3.1	描述業務活動對環境及天然資源的重大影響及已採取管理有關影響的行動。	踐行低碳運營
層面A4：氣候變化	一般披露	識別及應對已經及可能會對發行人產生影響的重大氣候相關事宜的政策。	应对气候变化踐
	A4.1	描述已經及可能會對發行人產生影響的重大氣候相關事宜，及應對行動。	应对气候变化
B社會
層面B1：雇傭	一般披露	有關薪酬及解雇、招聘及晉升、工作時數、假期、平等機會、多元化、反歧視以及其他待遇及福利的政策；及遵守對發行人有重大影響的相關法律及規例的資料。	員工權益保障
	B1.1	按性別、雇傭類型（如全職或兼職）、年齡組別及地區劃分的雇員總數。	員工權益保障
	B1.2	按性別、年齡組別及地區劃分的雇員流失比率。	加強員工關愛
層面B2：健康與安全	一般披露	有關提供安全工作環境及保障雇員避免職業性危害的政策；及遵守對發行人有重大影響的相關法律及規例的資料。	職業健康安全
	B2.1	過去三年（包括匯報年度）每年因工亡故的人數及比率。	關鍵績效表
	B2.2	因工傷損失工作日數。	關鍵績效表
	B2.3	描述所採納的職業健康與安全措施，以及相關執行及監察方法。	職業健康安全
層面B3：發展及培訓	一般披露	有關提升雇員履行工作職責的知識及技能的政策。描述培訓活動。	員工職業發展
	B3.1	按性別及雇員類別（如高級管理層、中級管理層等）劃分的受訓雇員百分比。	關鍵績效表
	B3.2	按性別及雇員類別劃分，每名雇員完成受訓的平均時數。	關鍵績效表
層面B4：勞工準則	一般披露	有關防止童工或強制勞工的政策；及遵守對發行人有重大影響的相關法律及規例的資料。	員工權益保障
	B4.1	描述檢討招聘慣例的措施以避免童工及強制勞工。	員工權益保障
	B4.2	描述在發現違規情況時消除有關情況所採取的步驟。	員工權益保障
層面B5：供應鏈管理	一般披露	管理供應鏈的環境及社會風險政策。	推廣綠色採購
	B5.1	供應商數目。	關鍵績效表
	B5.2	描述有關聘用供應商的慣例，向其執行有關慣例的供應商數目，以及有關慣例的執行及監察方法。	推廣綠色採購
	B5.3	描述有關識別供應鏈每個環節的環境及社會風險的慣例，以及相關執行及監察方法。	推廣綠色採購
	B5.4	描述在揀選供應商時促使多用環保產品及服務的慣例，以及相關執行及監察方法。	推廣綠色採購
層面B6：產品責任	一般披露	有關所提供產品和服務的健康與安全、廣告、標籤及私隱事宜以及補救方法的政策；及遵守對發行人有重大影響的相關法律及規例的資料。	維護客戶權益
	B6.1	已售或已運送產品總數中因安全與健康理由而須回收的百分比。	不適用
	B6.2	接獲關於產品及服務的投訴數目以及應對方法。	維護客戶權益
	B6.3	描述與維護及保障知識產權有關的慣例。	合規運營管理
	B6.4	描述質量檢定過程及產品回收程序。	不適用
	B6.5	描述消費者數據保障及私隱政策，以及相關執行及監察方法。	維護客戶權益
層面B7：反貪汙	一般披露	有關防止賄賂、勒索、欺詐及洗黑錢的政策；及遵守對發行人有重大影響的相關法律及規例的資料。	黨建工作引領
	B7.1	於匯報期內對發行人或其雇員提出並已審結的貪污訴訟案件的數目及訴訟結果。	黨建工作引領
	B7.2	描述防範措施及舉報程序，以及相關執行及監察方法。	黨建工作引領
	B7.3	描述向董事及員工提供的反貪汙培訓。	黨建工作引領
層面B8：社區投資	一般披露	有關以社區參與來瞭解營運所在社區需要和確保其業務活動會考慮社區利益的政策。	踐行社會公益
	B8.1	專注貢獻範疇（如教育、環境事宜、勞工需求、健康、文化、體育）。	踐行社會公益
	B8.2	在專注範疇所動用資源（如金錢或時間）。	踐行社會公益
