# Supplementary material
Source: ML conference proceedings conference paper supplement (https://openreview.net/forum?id=xg0fmtqh8d)
Supplement: supplementary_material [file 443_德明利:深圳市德明利技术股份有限公司向特定对象发行股票并在主板上市募集说明书(修订稿).xlsx]

## Sheet: Sheet
序号	核心技术名称	主要用途	所处阶段	技术来源	应用产品	对应专利或正在申请专利
1	闪存管理算法专用协处理器技术	通过硬件加速来提高闪存管理算法的运行效率	成熟	自主研发	带闪存接口的存储控制芯片	201920611943.6一种基于通用闪存存储器的闪存装置以及设备；201910415027.X一种命令队列优化管理的实现方法和系统以及设备
2	低功耗设计方法和流程	降低芯片的动态和静态功耗，提高存储设备长时间工作的稳定性，延长设备的待机时间	成熟	自主研发	对功耗要求严格的移动存储及嵌入式存储控制芯片	201811626099.0一种存储数据的动态回收处理方法及存储装置；201910314777.8一种存储设备的测试方法和装置以及设备； 201921687360.8一种通用串行总线集线装置和通用串行总线集线设备
3	NANDFlash重配置技术	重新配置NANDFlash内部运行参数，让Flash运行更加稳定，提高数据耐久性	成熟	自主研发	移动存储产品	201810551270.X一种Flash数据分析过滤器； 201810917098.5一种USB设备的上盘配置方法及主机； 201811104364.9一种随机数发生器及随时数产生方法； 202010022445.5一种存储设备的命令序列测试方法和装置以及设备
4	NANDFlash随机碎片利用技术	高效的利用碎片存储空间，提高Flash的空间利用率	成熟	自主研发	移动存储产品	201810975706.8一种基于FAT文件的数据删除方法、数据存储设备及系统；201910415027.X一种命令队列优化管理的实现方法和系统以及设备
5	NANDFlash擦写均衡技术	高效的利用flash擦写特性，提高产品的整体稳定性和使用寿命	成熟	自主研发	移动存储产品	201811085165.8一种闪存冷数据识别方法； 201811626099.0一种存储数据的动态回收处理方法及存储装置；201910384136.X一种防止U盘数据丢失和系统损坏的方法和装置以及设备；201910867061.0一种提高NANDflash数据稳定性的方法以及装置
6	矩阵式高速ECC纠错算法技术	矩阵式位纠错算法（LLRTable）,提升闪存数据稳定度和最低的错误率	成熟	自主研发	带闪存接口的存储控制芯片	201810507105.4一种ECC数据存储方法、系统及存储介质
7	SSD可靠性技术	对影响SSD使用的控制器、NANDFlash进行筛选，提升SSD使用可靠性	成熟	自主研发	固态硬盘产品	ZL2022113268179闪存块管理方法、装置、设备和存储介质；ZL2022108963793故障SRAM的筛选方法、装置及软硬件系统
8	高性能硬件内存管理技术	用于存储类控制器芯片内存自动化管理，提升内存使用效率	成熟	自主研发	存储类控制器芯片	ZL2022113284468链表管理方法、链表管理系统和链表管理结构； ZL2023103413467资源分配结构、内存管理方法和内存管理系统；2024106670496数据存储方法、装置及电子设备
9	高性能NANDFlash控制技术	用于存储类控制器芯片NANDFlash控制，提升NANDFlash读写性能	成熟	自主研发	存储类控制器芯片	ZL2022108299942闪存交错访问方法、装置、电子设备及可读存储介质、ZL2022113085271闪存的数据随机化处理方法和装置； 2024103193298数据加扰方法、装置、电路及电子设备； 2024103791520基于ONFI协议的数据读写电路及闪存读写控制器
10	SSD硬件保护技术	用于SSD硬件设计，通过电流检查，电压调节，过流保护等提升SSD硬件可靠性	成熟	自主研发	固态硬盘产品	ZL2023205998894一种过流短路保护电路和电子设备； ZL2022113292322电流检测电路、电气设备及电流检测电路的控制方法；ZL2022107490078闪存电压自适应调节方法、系统和存储设备
11	存储白盒测试技术	用于存储类产品的白盒测试技术，提升产品在底层协议上的遵从性和兼容性	成熟	自主研发	存储类产品	ZL2022113160713硬盘传输性能的确定方法、装置、计算机设备及存储质；ZL2022113975697任务处理方法、装置、存储设备和存储介质
12	高可靠SSD固件算法技术	用于SSD固件算法，提升SSD可靠性、性能	成熟	自主研发	固态硬盘产品	ZL2022110736020VCTable的更新方法、固态硬盘及电子设备；ZL202211290732X存储系统数据的读取方法、装置及电子设备；ZL2022113628102失效数据块的选取方法、装置及电子设备；2024103413334基于固态硬盘的数据写入方法、装置及电子设备；2024105826558数据迁移方法、装置、固态硬盘和计算机可读存储介质； 2024107100201 一种内存处理方法、装置及相关设备
