# Supplementary material
Source: ML conference proceedings conference paper supplement (https://openreview.net/forum?id=xg0fmtqh8d)
Supplement: supplementary_material [file 444_德明利:深圳市德明利技术股份有限公司向特定对象发行股票并在主板上市募集说明书(修订稿).xlsx]

## Sheet: Sheet
项目	数据	备注
营业收入（万元）	254,290.00	计算期平均
毛利率	12.48%	计算期平均
净利润（万元）	17,297.88	计算期平均
内部收益率	20.56%	税后
动态投资回收期（年）	9.24	税后
