# Supplementary material
Source: ML conference proceedings conference paper supplement (https://openreview.net/forum?id=xg0fmtqh8d)
Supplement: supplementary_material [file 445_维信诺:维信诺科技股份有限公司审阅报告.xlsx]

## Sheet: Sheet
项目	本期发生额	上期发生额
人工费用	178,865,487.14	343,722,789.48
差旅费	6,388,465.74	12,930,546.47
办公费	1,619,518.95	6,460,975.97
折旧费	16,828,541.32	28,499,867.26
无形资产摊销	49,029,150.68	94,027,058.85
业务招待费	4,056,760.81	11,613,575.57
修理费	137,363.23	190,643.53
中介费	22,253,313.58	56,433,406.18
房租及物业费	7,757,541.21	16,971,502.50
其他	17,120,433.07	38,028,973.23
合计	304,056,575.73	608,879,339.04
