# Supplementary material
Source: ML conference proceedings conference paper supplement (https://openreview.net/forum?id=xg0fmtqh8d)
Supplement: supplementary_material [file 446_龙源电力:龙源电力集团股份有限公司2024年9月发电量数据公告.xlsx]

## Sheet: Sheet
业务板块及地区分布	2024年9月发电量（兆瓦时）	2023年9月发电量（兆瓦时）	9月同比变化率（%）	2024年累计发电量（兆瓦时）	2023年累计发电量（兆瓦时）	年累计发电量同比变化率（%）
风电业务	4,668,639	3,629,218	28.64	43,861,535	44,673,091	-1.82
其中：黑龙江	260,851	215,344	21.13	2,122,626	2,234,749	-5.02
吉林	142,288	142,896	-0.43	1,501,036	1,462,410	2.64
辽宁	210,967	165,622	27.38	2,417,766	2,575,672	-6.13
内蒙古	414,150	463,436	-10.63	4,543,230	5,170,224	-12.13
江苏陆上	221,893	95,136	133.24	1,777,898	1,736,252	2.40
江苏海上	526,351	272,323	93.28	4,389,750	3,952,334	11.07
浙江	27,378	17,808	53.74	260,894	261,139	-0.09
福建	223,912	203,425	10.07	2,028,677	2,084,764	-2.69
海南	3,589	6,354	-43.52	71,654	80,814	-11.34
甘肃	377,110	288,261	30.82	2,721,027	2,707,488	0.50
新疆	286,075	243,271	17.60	2,721,531	3,014,967	-9.73
河北	223,677	218,949	2.16	2,494,928	2,936,929	-15.05
云南	172,639	109,997	56.95	2,514,411	2,299,740	9.33
安徽	179,373	100,196	79.02	1,314,495	1,327,932	-1.01
山东	98,498	56,983	72.86	1,115,872	1,137,907	-1.94
天津	55,016	40,008	37.51	736,169	750,123	-1.86
山西	183,601	112,922	62.59	1,791,450	1,826,140	-1.90
宁夏	170,650	119,175	43.19	1,230,174	1,182,059	4.07
贵州	129,657	136,044	-4.69	1,446,750	1,224,043	18.19
陕西	183,155	145,407	25.96	1,321,691	1,395,090	-5.26
西藏	593	1,004	-40.88	10,968	10,657	2.92
重庆	79,090	60,051	31.71	520,168	501,865	3.65
上海	11,140	4,989	123.30	85,938	82,731	3.88
广东	16,012	18,483	-13.37	235,933	226,545	4.14
湖南	61,776	60,552	2.02	508,586	578,745	-12.12
广西	183,153	146,487	25.03	1,966,183	1,829,084	7.50
江西	29,935	25,083	19.35	360,753	355,813	1.39
湖北	20,392	15,346	32.88	154,147	173,546	-11.18
青海	23,099	21,024	9.87	210,781	248,115	-15.05
河南	53,945	22,317	141.71	410,634	403,896	1.67
加拿大	9,965	9,242	7.82	164,727	161,257	2.15
南非	74,686	76,672	-2.59	568,771	600,100	-5.22
乌克兰	14,023	14,411	-2.69	141,918	139,960	1.40
火电业务	272,702	669,126	-59.25	7,162,990	7,645,833	-6.32
其他可再生能源业务	650,159	483,267	34.53	5,822,066	3,185,625	82.76
总计	5,591,501	4,781,611	16.94	56,846,592	55,504,550	2.42
