# Supplementary material
Source: ML conference proceedings conference paper supplement (https://openreview.net/forum?id=xg0fmtqh8d)
Supplement: supplementary_material [file 447_四川成渝高速公路:二零二四年度中期业绩公告.xlsx]

## Sheet: Sheet
	合計人民幣千元	一年內人民幣千元	一年至五年人民幣千元	五年以上人民幣千元
銀行貸款	35,166,109	2,829,649	8,951,098	23,385,362
中期票據	390,000	290,000	100,000	–
公司債券	2,000,000	–	2,000,000	–
其他借款及租賃負債	2,496,641	1,097,035	1,388,784	10,822
應計利息	64,183	64,183	–	–
合計（截止2024年6月30日（未經審核）	40,116,933	4,280,867	12,439,882	23,396,184
合計（截止2023年12月31日（經審核））	37,780,677	3,387,660	11,535,949	22,857,068
