# Supplementary material
Source: ML conference proceedings conference paper supplement (https://openreview.net/forum?id=xg0fmtqh8d)
Supplement: supplementary_material [file 448_中国太保:海外监管公告-偿付能力季度报告摘要节录(太平洋安信农业保险股份有限公司)(2024年第2季度).xlsx]

## Sheet: Sheet
行次	項 目	本季度數	上季度數	下季度預測數
1	認可資產	7,185,469,010	7,512,075,380	7,041,291,997
2	認可負債	3,994,740,277	4,331,039,746	3,833,098,037
3	實際資本	3,190,728,733	3,181,035,635	3,208,193,960
3.1	其中：核心一級資本	2,873,574,034	2,851,725,857	2,891,039,261
3.2	核心二級資本	-	-	-
3.3	附屬一級資本	317,154,699	329,309,777	317,154,699
3.4	附屬二級資本	-	-	-
4	最低資本	907,866,752	880,904,362	939,501,822
4.1	其中:量化風險最低資本	889,554,971 -	863,136,415	920,551,803
4.1.1	壽險業務保險風險最低資本		-	-
4.1.2	非壽險業務保險風險最低資本	725,924,044	713,315,875	765,249,284
4.1.3	市場風險最低資本	392,353,638	386,629,248	390,596,094
4.1.4	信用風險最低資本	319,219,001	289,595,476	324,498,397
4.1.5	量化風險分散效應	449,102,270	430,500,137	457,508,438
4.1.6	特定類別保險合同損失吸收效應	-	-	-
4.2	控制風險最低資本	18,311,781	17,767,946	18,950,019
4.3	附加資本	-	-	-
5	核心償付能力溢額	1,965,707,282	1,970,821,496	1,951,537,439
6	核心償付能力充足率	316.52%	323.73%	307.72%
7	綜合償付能力溢額	2,282,861,981	2,300,131,273	2,268,692,137
8	綜合償付能力充足率	351.45%	361.11%	341.48%
