# Supplementary material
Source: ML conference proceedings conference paper supplement (https://openreview.net/forum?id=xg0fmtqh8d)
Supplement: supplementary_material [file 449_德明利:深圳市德明利技术股份有限公司向特定对象发行股票并在主板上市募集说明书(修订稿).xlsx]

## Sheet: Sheet
序号	法律法规	颁布部门	颁布时间	相关内容
1	《国务院关于加快培育和发展战略性新兴产业的决定》（国发[2010]32号）	国务院	2010年10月	提出着力发展集成电路、高端服务器等核心基础产业
2	《国务院关于印发进一步鼓励软件产业和集成电路产业发展若干政策的通知》（国发[2011]4号）	国务院	2011年1月	从财税、投融资、研究开发、进出口、人才、知识产权、市场等七个方面为集成电路产业发展提供了更多的优惠政策
3	《国民经济和社会发展第十二个五年规划纲要》	十一届全国人大四次会议	2011年3月	提出大力发展新一代信息技术产业，其中重点发展集成电路等产业
4	《当前优先发展的高技术产业化重点领域指南（2011年度）》	发改委、科技部、工业和信息化部、商务部、知识产权局	2011年6月	指出集成电路为优先发展的高技术产业化重点领域
5	《集成电路产业“十二五”发展规划》	工信部	2012年2月	作为我国集成电路行业发展的指导性文件和加强行业管理的依据，对“十二五”期间集成电路产业的发展指明了方向
6	《软件和信息技术服务业“十二五”发展规划》	工信部	2012年4月	提出重点发展集成电路设计，其中着重提高高端通用芯片等设计能力，形成系统方案解决能力
7	《国家集成电路产业发展推进纲要》	国务院	2014年6月	着力发展集成电路设计业。围绕重点领域产业链，强化集成电路设计、软件开发、系统集成、内容与服务协同创新，以设计业的快速增长带动制造业的发展。近期聚焦移动智能终端和网络通信领域，开发量大面广的移动智能终端芯片、数字电视芯片、网络通信芯片、智能穿戴设备芯片及操作系统，提升信息技术产业整体竞争力
8	《国务院关于印发“十三五”国家战略性新兴产业发展规划的通知》	国务院	2016年11月	启动集成电路重大生产力布局规划工程，实施一批带动作用强的项目，推动产业能力实现快速跃升。加快先进制造工艺、存储器、特色工艺等生产线建设，提升安全可靠CPU、数模/模数转换芯片、数字信号处理芯片等关键产品设计开发能力和应用水平，推动封装测试、关键装备和材料等产业快速发展。支持提高代工企业及第三方IP核企业的服务水平，支持设计企业与制造企业协同创新，推动重点环节提高产业集中度。推动半导体显示产业链协同创新
9	《国务院关于印发“十三五”国家信息化规划的通知》	国务院	2016年12月	大力推进集成电路创新突破。加大面向新型计算、5G、智能制造、工业互联网、物联网的芯片设计研发部署，推动32/28nm、16/14nm工艺生产线建设，加快10/7nm工艺技术研发，大力发展芯片级封装、圆片级封装、硅通孔和三维封装等研发和产业化进程，突破电子设计自动化（EDA）软件
10	《国家创新驱动发展战略纲要》	国务院	2016年5月	加大集成电路、工业控制等自主软硬件产品和网络安全技术攻关和推广力度，推动产业技术体系创新，创造发展新优势；攻克高端通用芯片、集成电路装备等关键核心技术，形成战略性技术和产品，培育新兴产业
11	《战略性新兴产业重点产品和服务指导目录（2016版）》	发改委	2017年1月	明确集成电路等电子核心产业地位，并将集成电路芯片设计及服务列为战略性新兴产业重点产品和服务
12	《2018年国务院政府工作报告》	国务院	2018年	加快制造强国建设。推动集成电路、第五代移动通信、飞机发动机、新能源汽车、新材料等产业发展，实施重大短板装备专项工程，推进智能制造，发展工业互联网平台
13	《2019年国务院政府工作报告》	国务院	2019年	促进新兴产业加快发展。深化大数据、人工智能等研发应用，培育新一代信息技术、高端装备、生物医药、新能源汽车、新材料等新兴产业集群，壮大数字经济。加强新一代信息基础设施建设
14	《广东省人民政府办公厅关于印发广东省加快半导体及集成电路产业发展若干意见的通知》	广东省人民政府	2020年	为贯彻落实《粤港澳大湾区发展规划纲要》和国家关于集成电路产业发展的决策部署，加快广东省半导体及集成电路产业发展，提升产业核心竞争力，广东省在2020年发布了若干新政策，助力加快半导体及集成电路产业发展，并重点集中在关键的存储芯片、处理器等高端通用芯片上
15	《新时期促进集成电路产业和软件产业高质量发展的若干政策》	国务院	2020年	为进一步优化集成电路产业和软件产业发展环境，深化产业国际合作，提升产业创新能力和发展质量，制定出台财税、投融资、研究开发、进出口、人才、知识产权、市场应用、国际合作等八个方面政策措施。进一步创新体制机制，鼓励集成电路产业和软件产业发展，大力培育集成电路领域和软件领域企业。加强集成电路和软件专业建设，加快推进集成电路一级学科设置，支持产教融合发展。严格落实知识产权保护制度，加大集成电路和软件知识产权侵权违法行为惩治力度。推动产业集聚发展，规范产业市场秩序，积极开展国际合作。大力支持符合条件的集成电路企业和软件企业在境内外上市融资，加快境内上市审核流程，符合企业会计准则相关条件的研发支出可作资本化处理
16	《中华人民共和国国民经济和社会发展第十四个五年规划和2035年远景目标纲要》	全国人大	2021年	聚焦高端芯片、操作系统、人工智能关键算法、传感器等关键领域，加快推进基础理论、基础算法、装备材料等研发突破与迭代应用。加强通用处理器、云计算系统和软件核心技术一体化研发。加快布局量子计算、量子通信、神经芯片、DNA存储等前沿技术，加强信息科学与生命科学、材料等基础学科的交叉创新，支持数字技术开源社区等创新联合体发展，完善开源知识产权和法律体系，鼓励企业开放软件源代码、硬件设计和应用服务
17	《“十四五”国家知识产权保护和运用规划》	国务院	2021年	为促进知识产权高质量创造，要健全高质量创造支持政策，加强人工智能、量子信息、集成电路、基础软件等领域自主知识产权创造和储备
18	《“十四五”信息通信行业发展规划》	工信部	2021年	要完善数字化服务应用产业生态，加强产业链协同创新。丰富5G芯片、终端、模组、网关等产品种类。加快推动面向行业的5G芯片、模组、终端、网关等产品研发和产业化进程，推动芯片企业丰富产品体系，加快模组分级分类研发，优化模组环境适应性，持续降低功耗及成本，增强原始创新能力和产业基础支撑能力
19	《“十四五”数字经济发展规划》	国务院	2021年	增强关键技术创新能力。瞄准传感器、量子信息、网络通信、集成电路、关键软件、大数据、人工智能、区块链、新材料等战略性前瞻性领域，发挥我国社会主义制度优势、新型举国体制优势、超大规模市场优势，提高数字技术基础研发能力。以数字技术与各领域融合应用为导向，推动行业企业、平台企业和数字技术服务企业跨界创新，优化创新成果快速转化机制，加快创新技术的工程化、产业化。鼓励发展新型研发机构、企业创新联合体等新型创新主体，打造多元化参与、网络化协同、市场化运作的创新生态体系。支持具有自主核心技术的开源社区、开源平台、开源项目发展，推动创新资源共建共享，促进创新模式开放化演进
20	《扩大内需战略规划纲要（2022-2035年）》	中共中央、国务院	2022年	壮大战略性新兴产业。深入推进国家战略性新兴产业集群发展，建设国家级战略性新兴产业基地。全面提升信息技术产业核心竞争力，推动人工智能、先进通信、集成电路、新型显示、先进计算等技术创新和应用
21	《国务院关于落实<政府工作报告>重点工作分工的意见》	国务院	2022年	加快发展工业互联网，培育壮大集成电路、人工智能等数字产业，提升关键软硬件技术创新和供给能力
22	《算力基础设施高质量发展行动计划》	工信部等六部门	2023年	鼓励存储产品制造企业持续提升关键存储部件等自主研发制造水平，打造存储介质、存储芯片、存储系统和存储应用相互促进、协同发展的产业生态
23	《电子信息制造业2023—2024年稳增长行动方案》	工信部、财政部	2023年	落实集成电路企业增值税加计抵减政策，协调解决企业在享受优惠政策中的问题。着力提升芯片供给能力，积极协调芯片企业与应用企业的对接交流。面向数字经济等发展需求，优化集成电路、新型显示等产业布局并提升高端供给水平，增强材料、设备及零配件等配套能力
24	《产业结构调整指导目录（2024年本）》	发改委	2023年	集成电路设计，集成电路线宽小于65纳米(含)的逻辑电路、存储器生产，线宽小于0.25微米（含）的特色工艺集成电路生产（含掩模版、8英寸及以上硅片生产)，集成电路线宽小于0.5微米（含）的化合物集成电路生产,和球栅阵列封装(BGA)插针网格阵列封装(PGA)、芯片规模封装(CSP)、多芯片封装(MCM)、栅格阵列装(LGA)、系统级封装(SIP)、倒装封装(FC)、晶圆级封装(WLP)、传感器封装(MEMS)、2.5D3D等一种或多种技术集成的先进封装与测试，集成电路装备及关键零部件制造
25	《信息化标准建设行动计划（2024-2027年）》	中央网信办、市场监管总局、工信部	2024年	围绕集成电路关键领域，加大先进计算芯片、新型存储芯片关键技术标准攻关，推进人工智能芯片、车用芯片、消费电子用芯片等应用标准研制
