# Supplementary material
Source: ML conference proceedings conference paper supplement (https://openreview.net/forum?id=xg0fmtqh8d)
Supplement: supplementary_material [file 450_甘肃能源:关于控股股东非公开发行可交换公司债券换股进展暨权益变动比例超过1%的公告.xlsx]

## Sheet: Sheet
信息披露义务人	甘肃省电力投资集团有限责任公司
住所	甘肃省兰州市城关区北滨河东路 69 号
权益变动时间	2024 年 5 月 21 日至 2024 年 10 月 8 日
股票简称	甘肃能源	股票代码	000791
变动类型（可多选）	增加□减少	一致行动人	有□无
是否为第一大股东或实际控制人	是否□
