# Supplementary material
Source: ML conference proceedings conference paper supplement (https://openreview.net/forum?id=xg0fmtqh8d)
Supplement: supplementary_material [file 451_药明康德:截至2024年6月30日止六个月未经审计中期业绩公告.xlsx]

## Sheet: Sheet
	截至6月30日止六個月
	2024年		2023年
	毛利人民幣百萬元	毛利率	毛利人民幣百萬元	毛利率	毛利變動
WuXi Chemistry	5,243.8	42.9%	5,906.6	43.9%	(11.2)%
WuXi Testing	1,052.9	34.9%	1,118.6	36.2%	(5.9)%
WuXi Biology	420.5	36.0%	483.0	39.2%	(12.9)%
WuXi ATU	(172.5)	(30.0)%	(57.9)	(8.1)%	不適用
WuXi DDSU	150.1	58.4%	95.9	28.0%	56.5%
主營業務毛利	6,694.8	38.9%	7,546.3	40.0%	(11.3)%
其他業務毛利	6.0	51.9%	9.4	37.8%	(35.7)%
綜合毛利	6,700.9	38.9%	7,555.7	40.0%	(11.3)%
