# Supplementary material
Source: ML conference proceedings conference paper supplement (https://openreview.net/forum?id=xg0fmtqh8d)
Supplement: supplementary_material [file 452_广发证券:2023年度社会责任报告.xlsx]

## Sheet: Sheet
項目	單位	數量
員工流失人數	人	308
員工流失率	%	3.95
其中:
女性員工流失人數	人	147
女性員工流失佔流失人數比重	%	47.73
男性員工流失人數	人	161
男性員工流失佔流失人數比重	%	52.27
30 歲及以下員工流失人數	人	115
30 歲及以下員工流失佔該年齡段比率	%	1.48
31 歲-40 歲員工流失人數	人	160
31 歲-40 歲員工流失佔該年齡段比率	%	2.05
41 歲-50 歲員工流失人數	人	30
41 歲-50 歲員工流失佔該年齡段比率	%	0.38
51 歲以上員工流失人數	人	3
51 歲以上員工流失佔該年齡段比率	%	0.04
