# Supplementary material
Source: ML conference proceedings conference paper supplement (https://openreview.net/forum?id=xg0fmtqh8d)
Supplement: supplementary_material [file 453_世界华文媒体:截至2024年3月31日止第4季度财务报告.xlsx]

## Sheet: Sheet
	截至3月31日止年度		截至3月31日止年度
	2024年千美元	2023年千美元	2024年千馬幣(附註)	2023年千馬幣(附註)
營業額	147,018	132,655	695,542	627,591
已售貨品成本
除物業、廠房、設備及無形資產減值撥備前已售貨品成本	(109,130)	(85,330)	(516,294)	(403,696)
物業、廠房、設備及無形資產減值撥備	(8,064)	-	(38,151)	-
	(117,194)	(85,330)	(554,445)	(403,696)
毛利	29,824	47,325	141,097	223,895
其他收入	5,885	8,057	27,842	38,118
其他收益/(虧損)淨額	1,849	(111)	8,748	(525)
銷售及分銷支出	(27,507)	(29,311)	(130,136)	(138,670)
行政支出 金融資產虧損(撥備)/撥備撥回	(22,313)	(22,241)	(105,563)	(105,223)
淨額	(21)	84	(99)	397
其他經營支出	-	(1,278)	-	(6,046)
經營(虧損)/溢利	(12,283)	2,525	(58,111)	11,946
融資成本	(1,294)	(806)	(6,122)	(3,813)
應佔聯營公司及合營企業業績	(20)	(12)	(95)	(57)
除所得稅前(虧損)/溢利	(13,597)	1,707	(64,328)	8,076
所得稅支出	(34)	(2,590)	(160)	(12,253)
年度虧損	(13,631)	(883)	(64,488)	(4,177)
以下人士應佔虧損：
本公司擁有人	(12,907)	(245)	(61,063)	(1,159)
非控股權益	(724)	(638)	(3,425)	(3,018)
	(13,631)	(883)	(64,488)	(4,177)
本公司擁有人應佔每股虧損
基本(美仙/馬仙) #	(0.76)	(0.01)	(3.60)	(0.09)
攤薄(美仙/馬仙) #	(0.76)	(0.01)	(3.60)	(0.09)
