# Supplementary material
Source: ML conference proceedings conference paper supplement (https://openreview.net/forum?id=xg0fmtqh8d)
Supplement: supplementary_material [file 454_德明利:深圳市德明利技术股份有限公司向特定对象发行股票并在主板上市募集说明书(修订稿).xlsx]

## Sheet: Sheet
项目	2024年1-6月		2023年度		2022年度		2021年度
	金额	占比	金额	占比	金额	占比	金额	占比
NANDFlash晶圆	204,084.54	66.62%	199,085.33	73.64%	82,064.65	65.23%	79,336.94	74.55%
晶圆封装片	30,745.13	10.04%	13,033.47	4.82%	3,448.71	2.74%	294.68	0.28%
内存条	37,603.21	12.27%	10,507.13	3.89%	-	0.00%	-	0.00%
芯片代工	76.48	0.02%	1,653.30	0.61%	4,003.63	3.18%	1,922.33	1.81%
晶圆颗粒封装测试	1,494.26	0.49%	4,284.91	1.58%	3,863.49	3.07%	2,860.74	2.69%
存储模组封装测试	2,759.42	0.90%	7,880.76	2.91%	8,556.29	6.80%	6,118.06	5.75%
外购存储卡/盘、嵌入式存储主控芯片	598.87	0.20%	2,545.81	0.94%	415.06	0.33%	264.51	0.25%
外购固态硬盘主控芯片	4,972.28	1.62%	8,117.32	3.00%	4,917.32	3.91%	5,100.14	4.79%
合计	282,334.20	92.16%	247,108.02	91.39%	107,269.15	85.26%	95,897.40	90.12%
