# Supplementary material
Source: ML conference proceedings conference paper supplement (https://openreview.net/forum?id=xg0fmtqh8d)
Supplement: supplementary_material [file 455_森马服饰:关于2024年股票期权激励计划授予登记完成的公告.xlsx]

## Sheet: Sheet
姓名	职务	获授的股票期权数量（万份）	占本激励计划授出全部权益数量的比例	占授予时股本总额的比例
张宏亮	董事、副总经理	336.1400	3.46%	0.12%
钟德达	董事、副总经理	336.1400	3.46%	0.12%
陈新生	董事、副总经理、财务总监	336.1400	3.46%	0.12%
宗惠春	董事会秘书	84.0400	0.86%	0.03%
黄剑忠	副总经理	58.8300	0.61%	0.02%
核心管理人员、核心技术人员以及董事会认为需要进行激励的相关员工（139人）		8,572.0600	88.16%	3.18%
合计		9,723.3500	100.00%	3.61%
