# Supplementary material
Source: ML conference proceedings conference paper supplement (https://openreview.net/forum?id=xg0fmtqh8d)
Supplement: supplementary_material [file 457_广发证券:海外监管公告-广发证券股份有限公司2024年面向专业投资者公开发行短期公司债券(第四期)信用评级报告.xlsx]

## Sheet: Sheet
	2021		2022		2023
	金额	占比	金额	占比	金额	占比
手续费及佣金净收入	18,784.57	54.85	16,363.19	65.11	14,512.34	62.29
其中:经纪业务净收入	7,970.41	23.27	6,386.85	25.41	5,810.15	24.94
投资银行业务净收入	432.64	1.26	610.37	2.43	566.32	2.43
基金管理业务净收入	8,917.28	26.04	8,153.26	32.44	7,355.86	31.57
资产管理业务净收入	1,028.41	3.00	785.89	3.13	371.79	1.60
投资净收益(含公允价值变动损益)	7,224.62	21.09	2,200.33	8.76	4,289.64	18.41
利息净收入	4,930.92	14.40	4,101.11	16.32	3,136.02	13.46
汇兑损益	4.27	0.01	(47.04)	(0.19)	(10.18)	(0.04)
其他	3,305.61	9.65	2,514.43	10.00	1,371.71	5.89
营业收入合计	34,249.99	100.00	25,132.01	100.00	23,299.53	100.00
其他业务成本	(2,057.59)		(1,059.76)		(354.63)
经调整后的营业收入	32,192.40		24,072.26		22,944.90
