# Supplementary material
Source: ML conference proceedings conference paper supplement (https://openreview.net/forum?id=xg0fmtqh8d)
Supplement: supplementary_material [file 458_德明利:深圳市德明利技术股份有限公司向特定对象发行股票并在主板上市募集说明书(修订稿).xlsx]

## Sheet: Sheet
序号	布图设计名称	布图设计登记号	权利人	申请日	权利期限	取得方式
1	TW2880存储卡控制芯片	BS.185559557	发行人	2018.07.20	10年	原始取得
2	TW8380USB闪存盘控制芯片	BS.185561918	发行人	2018.08.28	10年	原始取得
3	TW9080	BS.195592123	发行人	2019.05.17	10年	原始取得
4	TW2980	BS.195611276	发行人	2019.09.25	10年	原始取得
5	TW2981	BS.205548555	发行人	2020.07.06	10年	原始取得
6	TW8381	BS.215546792	发行人	2021.04.27	10年	原始取得
7	TW2983B	BS.22562592X	发行人	2022.12.12	10年	原始取得
8	TW6501	BS.235549339	发行人	2023.06.26	10年	原始取得
