# Supplementary material
Source: ML conference proceedings conference paper supplement (https://openreview.net/forum?id=xg0fmtqh8d)
Supplement: supplementary_material [file 459_强邦新材:上市首日风险提示公告.xlsx]

## Sheet: Sheet
项目	2023年末	2022年末	2021年末
流动资产合计	78,841.72	86,961.35	73,919.50
非流动资产合计	16,290.45	17,283.74	17,985.03
资产总计	95,132.17	104,245.09	91,904.54
流动负债合计	37,819.15	57,623.41	55,729.18
非流动负债合计	1,030.89	545.92	845.40
负债合计	38,850.04	58,169.33	56,574.58
所有者权益合计	56,282.13	46,075.76	35,329.96
