# Supplementary material
Source: ML conference proceedings conference paper supplement (https://openreview.net/forum?id=xg0fmtqh8d)
Supplement: supplementary_material [file 460_维信诺:维信诺科技股份有限公司审阅报告.xlsx]

## Sheet: Sheet
项目	本期	上期	说明
非流动性资产处置损益，包括已计提资产减值准备的冲销部分	-437,890.88	-399,376.55
计入当期损益的政府补助，但与公司正常经营业务密切相关、符合国家政策规定、按照确定的标准享有、对公司损益产生持续影响的政府补助除外	36,130,044.05	1,102,583,300.21
除同公司正常经营业务相关的有效套期保值业务外，非金融企业持有金融资产和金融负债产生的公允价值变动损益以及处置金融资产和金融负债产生的损益	10,008,183.69	52,568,395.79
计入当期损益的对非金融企业收取的资金占用费	-	-
因不可抗力因素，如遭受自然灾害而产生的各项资产损失	-	-
单独进行减值测试的应收款项减值准备转回	2,379,054.40	3,935,558.99
企业取得子公司、联营企业及合营企业的投资成本小于取得投资时应享有被投资单位可辨认净资产公允价值产生的收益	-	-
同一控制下企业合并产生的子公司期初至合并日的当期净损益	-	-
非货币性资产交换损益	-	-
债务重组损益	110,593,499.77	-
企业因相关经营活动不再持续而发生的一次性费用，如安置职工的支出等	-	-
因税收、会计等法律、法规的调整对当期损益产生的一次性影响	-	-
因取消、修改股权激励计划一次性确认的股份支付费用	-	-
对于现金结算的股份支付，在可行权日之后，应付职工薪酬的公允价值变动产生的损益	-	-
交易价格显失公允的交易产生的收益	-	-
除上述各项之外的其他营业外收入和支出	2,050,660.52	1,138,782.37
其他符合非经常性损益定义的损益项目	16,345,178.27	8,780,380.88	主要系收到的代扣代缴税金手续费返还和增值税加计抵减额等
减：所得税影响额	17,030,697.01	280,698,314.67
少数股东权益影响额（税后）	14,742,230.03	338,702,531.76
合计	145,295,802.78	549,206,195.26
