# Supplementary material
Source: ML conference proceedings conference paper supplement (https://openreview.net/forum?id=xg0fmtqh8d)
Supplement: supplementary_material [file 461_渣打集团:管理层中期报告-二_二四年第一季度业绩.xlsx]

## Sheet: Sheet
	截至二〇二四年三月三十一日止三個月百萬元	截至二〇二三年三月三十一日止三個月百萬元
利息收入	7,137	6,284
利息支出	(5,565)	(4,278)
淨利息收入	1,572	2,006
費用及佣金收入	1,180	1,038
費用及佣金支出	(212)	(198)
費用及佣金收入淨額	968	840
買賣收入淨額	2,489	1,649
其他經營收入	101	65
經營收入	5,130	4,560
員工成本	(2,110)	(1,960)
樓宇成本	(82)	(101)
一般行政支出	(551)	(390)
折舊及攤銷	(254)	(299)
經營支出	(2,997)	(2,750)
未計減損及稅項前經營溢利	2,133	1,810
信貸減值	(165)	(20)
商譽、樓宇、機器及設備以及其他減值	(60)	–
聯營公司及合營企業之溢利	6	18
除稅前溢利	1,914	1,808
稅項	(519)	(464)
本期間溢利	1,395	1,344
應佔溢利:
非控股權益	(8)	3
母公司股東	1,403	1,341
本期間溢利	1,395	1,344
每股盈利:
每股普通股基本盈利	46.5	40.7
每股普通股攤薄盈利	45.4	39.8
