# Supplementary material
Source: ML conference proceedings conference paper supplement (https://openreview.net/forum?id=xg0fmtqh8d)
Supplement: supplementary_material [file 462_中集集团:二零二三年度业绩公告(年度报告摘要).xlsx]

## Sheet: Sheet
合併資產負債表項目	2023年	2022年	本年比上年（增減）	2021年	2020年	2019年
流動資產總額	88,439,976	76,984,186	14.88%	81,457,379	67,141,741	90,023,127
非流動資產總額	73,323,257	68,915,763	6.40%	72,865,122	79,069,770	82,084,394
資產總額	161,763,233	145,899,949	10.87%	154,322,501	146,211,511	172,107,521
流動負債總額	78,985,163	62,998,154	25.38%	69,422,602	60,895,028	70,551,310
非流動負債總額	18,147,720	20,245,711	(10.36%)	27,919,809	31,462,639	46,518,233
負債總額	97,132,883	83,243,865	16.68%	97,342,411	92,357,667	117,069,543
股東權益總額	64,630,350	62,656,084	3.15%	56,980,090	53,853,844	55,037,978
歸屬於母公司股東及其他權益持有者的權益	47,857,805	48,613,429	(1.55%)	45,118,633	44,017,516	39,253,886
少數股東權益	16,772,545	14,042,655	19.44%	11,861,457	9,836,328	15,784,092
