# Supplementary material
Source: ML conference proceedings conference paper supplement (https://openreview.net/forum?id=xg0fmtqh8d)
Supplement: supplementary_material [file 463_上海电气:2023年度环境、社会及管治报告.xlsx]

## Sheet: Sheet
類別	內容	2022 年	2023 年
總計	總人數	41,739	42,190
性別	男	32,181	32,688
	女	9,558	9,502
年齡段	<20 歲	0	0
	20-29 歲	11,119	11,341
	30-39 歲	12,812	12,950
	40-49 歲	10,730	10,775
	50 歲及以上	7,078	7,124
地域	本省 / 市(上海市)	22,269	21,474
	外省 / 市(除上海市外的中國大陸地區)	16,480	17,744
	境外(中國大陸境外地區)	2,990	2,972
類型	全職員工	41,739	42,190
	兼職員工	0	0
職能	管理	3,882	3,859
	生產	18,692	19,054
	銷售	2,978	3,010
	技術研究	13,275	13,419
	財務審計	1,171	1,134
	行政後勤	1,741	1,714
學歷	博士	208	215
	碩士	4,201	4,241
	本科	17,918	18,161
	大專及大專以下	19,412	19,573
