# Supplementary material
Source: ML conference proceedings conference paper supplement (https://openreview.net/forum?id=xg0fmtqh8d)
Supplement: supplementary_material [file 464_中信建投证券:二零二四年第一季度业绩报告.xlsx]

## Sheet: Sheet
項目名稱	年初至報告期末(2024年1-3月)	上年初至上年報告期末(2023年1-3月)	變動比例(%)	主要原因
利息淨收入	161,704,831.94	456,998,954.29	-64.62	主要是融資融券業務利息收入減少。
投資收益	-943,034,972.31	1,537,931,128.00	-161.32	主要是金融工具投資收益減少。
公允價值變動損益	2,449,222,062.98	972,926,778.50	151.74	主要是金融工具公允價值變動收益增加。
匯兌損益	48,758,105.15	-3,917,480.09	不適用	主要是匯率變動。
其他業務收入	431,052,355.81	821,229,450.18	-47.51	主要是大宗商品銷售收入減少。
資產處置損益	-153,854.95	94,840.50	-262.22	主要是非流動資產處置損失增加。
其他收益	37,665,816.81	64,975,854.11	-42.03	主要是代扣代繳個人所得稅手續費返還 減少。
稅金及附加	19,995,909.43	34,564,010.54	-42.15	主要是繳納增值稅減少。
信用減值損失	-39,561,101.05	34,418,638.99	-214.94	主要是其他債權投資減值損失轉回。
其他資產減值損失	2,556,487.29	1,730,159.91	47.76	主要是存貨減值損失增加。
其他業務成本	419,733,295.30	801,863,570.74	-47.66	主要是大宗商品銷售成本減少。
營業外收入	239,600.45	955,141.38	-74.91	主要是其他營業外收入減少。
營業外支出	1,457,193.96	66,260,884.16	-97.80	主要是本期計提預計負債減少。
所得稅費用	91,329,009.18	527,145,858.66	-82.67	主要是利潤總額減少。
其他綜合收益的稅後淨額	142,631,134.54	327,359,722.65	-56.43	主要是其他債權投資本期浮盈減少。
經營活動產生的現金流量淨額	577,626,820.47	-9,412,318,174.11	不適用	主要是代理買賣證券業務、回購業務、融出資金產生的現金流入增加。
投資活動產生的現金流量淨額	4,318,477,543.54	-1,774,579,915.39	不適用	主要是收回投資收到的現金增加。
籌資活動產生的現金流量淨額	-2,246,472,058.36	5,941,515,026.48	-137.81	主要是發行債券及短期融資款收到的現金減少。
