# Supplementary material
Source: ML conference proceedings conference paper supplement (https://openreview.net/forum?id=xg0fmtqh8d)
Supplement: supplementary_material [file 465_上海电气:截至二零二三年十二月三十一日之全年业绩公告.xlsx]

## Sheet: Sheet
資產	附註	二零二三年十二月三十一日人民幣千元	二零二二年十二月三十一日人民幣千元
流動資產
貨幣資金		30,164,902	26,344,500
結算備付金 5,804 24,317		5,804	24,317
拆出資金		18,054,967	24,613,553
交易性金融資產		7,492,363	7,657,438
衍生金融資產		12,798	55,890
應收票據		3,995,445	6,257,285
應收賬款	3	40,477,926	38,279,969
應收款項融資		1,354,944	2,105,589
預付款項		9,511,724	10,276,967
其他應收款		5,984,167	6,156,517
買入返售金融資產		1,135,620	1,131,206
存貨		32,423,705	30,871,914
合同資產		21,913,397	21,801,813
一年內到期的非流動資產		1,976,785	2,857,670
其他流動資產		17,322,171	22,719,005
流動資產合計		191,826,718	201,153,633
非流動資產
發放貸款及墊款		7,370,067	1,590,952
債權投資		152,570	152,863
長期應收款		3,067,193	3,328,725
長期股權投資		11,001,371	11,183,753
其他非流動金融資產		7,339,112	7,268,463
投資性房地產		608,798	660,172
固定資產		20,427,312	20,282,308
在建工程		1,934,072	3,427,951
使用權資產		1,410,284	1,402,169
無形資產		12,256,813	12,582,986
開發支出		31,661	35,818
商譽		3,244,929	3,288,723
長期待攤費用		504,145	555,484
遞延所得稅資產		8,300,768	7,733,152
其他非流動資產		13,790,754	13,373,700
非流動資產合計		91,439,849	86,867,219
資產總計		283,266,567	288,020,852
負債及股東權益
流動負債
短期借款		8,272,416	8,660,895
交易性金融負債		34,435	32,017
衍生金融負債		3,425	10,450
應付票據		12,074,199	16,069,558
應付賬款	4	59,610,479	57,396,886
預收款項		859,959	786,313
合同負債		44,207,113	38,742,797
賣出回購金融資產款		1,000,000	-
吸收存款及同業存放		7,270,530	6,076,565
應付職工薪酬		5,381,579	4,958,030
應交稅費		2,466,028	2,030,487
其他應付款		8,144,533	7,859,473
一年內到期的非流動負債		6,898,720	9,120,361
其他流動負債		11,501,165	11,781,611
流動負債合計		167,724,581	163,525,443
非流動負債
長期借款		30,893,868	21,647,690
應付債券		749,300	748,697
租賃負債		1,150,996	1,077,425
長期應付款		561,953	562,855
遞延收益		1,333,337	1,491,212
長期應付職工薪酬		187,568	175,854
預計負債		3,028,758	3,592,976
遞延所得稅負債		614,502	836,321
其他非流動負債		95,064	168,212
非流動負債合計		38,615,346	30,301,242
負債合計		206,339,927	193,826,685
股東權益
股本		15,579,809	15,579,809
資本公積		19,476,900	21,837,822
其他綜合收益		21,601	(24,891)
專項儲備		134,056	143,786
盈餘公積		5,906,524	5,906,524
未分配利潤		11,678,998	11,419,263
歸屬於母公司股東權益合計		52,797,888	54,862,313
少數股東權益		24,128,752	39,331,854
股東權益合計		76,926,640	94,194,167
負債及股東權益總計		283,266,567	288,020,852
