# Supplementary material
Source: ML conference proceedings conference paper supplement (https://openreview.net/forum?id=xg0fmtqh8d)
Supplement: supplementary_material [file 466_赣锋锂业:截至2024年6月30日止六个月之中期业绩公告.xlsx]

## Sheet: Sheet
序號	資源類型	項目名稱	擁有權益	資源量
1	鋰輝石	澳大利亞MountMarion鋰輝石項目	50%	222.5萬噸LCE
2		澳大利亞Pilgangoora鋰輝石項目	5.74%	1,187萬噸LCE
3		馬裡Goulamina鋰輝石項目	60%	714萬噸LCE
4		愛爾蘭Avalonia鋰輝石項目	55%	勘探中
5		寧都河源鋰輝石項目	100%	10萬噸LCE
6	鋰鹽湖	阿根廷Cauchari-Olaroz鋰鹽湖項目	46.67%	2,458萬噸LCE
7		阿根廷Mariana鋰鹽湖項目	100%	812.1萬噸LCE
8		阿根廷PPG鋰鹽湖項目	100%	1,106萬噸LCE
9		青海一里坪鹽湖項目	49%	165萬噸LCE
10		德宗馬海湖項目	100%	勘探中
11	鋰雲母	上饒松樹崗鉭鈮礦項目	90%	149萬噸LCE
12		內蒙古維拉斯托鋰礦項目	12.5%	142萬噸LCE
13		湖南郴州香花舖鋰雲母礦項目	20%	勘探中
14		內蒙古加不斯鈮鉭礦項目	70%	111萬噸LCE
15	鋰黏土	墨西哥Sonora鋰黏土項目	100%	882萬噸LCE
