# Supplementary material
Source: ML conference proceedings conference paper supplement (https://openreview.net/forum?id=xg0fmtqh8d)
Supplement: supplementary_material [file 467_西部水泥:2023西部水泥环境、社会责任报告.xlsx]

## Sheet: Sheet
環境績效指標	單位	2023年	2022年
資源消耗
直接能源消耗量	億千瓦時	101.36	11938
煤炭消耗總量	億千瓦時	101.36	119.31
間接能源消耗量	億千瓦時	9.00	10.33
電能消耗總量	億千瓦時	8.85	10.33
能源消耗總量	億千瓦時	110.37	129.71
單位熟料能源消耗量（熟料工序）	千瓦時/噸熟料	878.22	915.90
單位營業收入能源消耗量	億千瓦時/億元人民幣	1.22	1.53
總耗水量	噸	2,630,000	2,858,424
生產單位噸熟料耗水量（熟料工序）	噸耗水量/噸熟料	0.13	0.13
單位營業收入耗水量	噸耗水量/億元人民幣	29,157.43	33,671.56
水泥包裝袋消耗量	噸	7,100	7,300
單位噸水泥包裝材料消耗量	千克/噸	1.4	3.78
單位營業收入消耗水泥包裝袋	噸/億元人民幣	78.71	85.99
溫室氣體排放
溫室氣體直接排放量（範疇一）	噸二氧化碳當量	10,359,742.60	11,617,185.84
溫室氣體間接排放量（範疇二）	噸二氧化碳當量	519,211.70	480,447.38
溫室氣體排放總量（範疇一+範疇二）	噸二氧化碳當量	10,878,954.30	12,097,633.22
生產單位熟料溫室氣體排放量（熟料工序）	噸二氧化碳當量/噸熟料	0.8657	0.8753
廢氣污染物
二氧化硫排放總量	噸	319.50	658.11
二氧化硫排放强度	千克/噸熟料	0.02	0.029
氮氧化物排放總量	噸	4431.23	8,492,21
氮氧化物排放强度	千克/噸熟料	0.33	0.372
顆粒物排放總量	噸	240.67	673.88
顆粒物排放强度	千克/噸熟料	0.018	0.030
廢棄物
有害廢棄物總量	噸	88.92	88.77
單位營業收入產生有害廢棄物量	噸/億元人民幣	0.99	1.05
無害廢棄物總量	噸	307.07	259.89
單位營業收入產生無害廢棄物量	噸/億元人民幣	3.40	3.06
