# Supplementary material
Source: ML conference proceedings conference paper supplement (https://openreview.net/forum?id=xg0fmtqh8d)
Supplement: supplementary_material [file 468_巨人网络:巨人网络集团股份有限公司章程(草案)(2024年10月修订).xlsx]

## Sheet: Sheet
发起人姓名	认购股份数	出资形式	持股比例	出资时间
彭建虎	3953.88 万元	净资产	88.851％	2006 年11 月14 日
彭俊珩	445 万元	净资产	10%	2006 年11 月14 日
张小灵	12.5 万元	净资产	0.281%	2006 年11 月14 日
刘彦	12.5 万元	净资产	0.281%	2006 年11 月14 日
叶桦	6.4 万元	净资产	0.144%	2006 年11 月14 日
刘光春	6.4 万元	净资产	0.144%	2006 年11 月14 日
李汉渝	5 万元	净资产	0.112%	2006 年11 月14 日
朱胤	3.2 万元	净资产	0.072%	2006 年11 月14 日
赵戈非	3.2 万元	净资产	0.072%	2006 年11 月14 日
刘红强	1.92 万元	净资产	0.043%	2006 年11 月14 日
