# Supplementary material
Source: ML conference proceedings conference paper supplement (https://openreview.net/forum?id=xg0fmtqh8d)
Supplement: supplementary_material [file 469_德明利:深圳市德明利技术股份有限公司向特定对象发行股票并在主板上市募集说明书(修订稿).xlsx]

## Sheet: Sheet
IC	指	IntegratedCircuit的缩写，即集成电路，是一种通过一定工艺把一个电路中所需的晶体管、二极管、电阻、电容和电感等元件及布线互连一起，制作在一小块或几小块半导体晶片或介质基片上，然后封装在一个管壳内，成为具有所需电路功能的微型电子器件或部件；当今半导体工业大多数应用的是基于硅的集成电路
Fabless	指	无晶圆厂的集成电路企业经营模式，采用该模式的厂商仅进行芯片的设计、研发、应用和销售，而将晶圆制造、封装和测试外包给专业的芯片代工、封装和测试厂商
固件	指	Firmware，一般存储于设备中的电可擦除只读存储器EEPROM中或FLASH芯片中，一般可由用户通过特定的刷新程序进行升级的程序，负责控制和协调集成电路中的功能
量产工具	指	PRODUCTIONTOOL，简称是PDT，向存储器中写入相应数据的软件工具，使存储器的容量大小、芯片数据、坏块地址等数据信息得以识别，成为可正常使用存储的产品
IP	指	IntellectualProperty的缩写，指已验证的、可重复利用的、具有某种确定功能的集成电路模块
USB	指	UniversalSerialBUS，通用串行总线；一种总线标准，广泛应用于计算机与移动存储设备等外部设备之间的接口技术
存储盘	指	即U盘，是一个USB接口的无需物理驱动器的微型高容量移动存储产品，采用NAND闪存作为存储介质，可以通过USB接口与电子设备连接，实现即插即用
存储卡	指	是一种利用NAND闪存技术存储数据信息的存储器，其尺寸小巧，外形多为卡片形式，具体产品形态包括SD卡、MicroSD卡、NM卡等
存储器、记忆体	指	具备存储功能的半导体元器件，作为基本元器件，广泛应用于各类电子产品中，发挥着程序或数据存储功能闪存（Flash）、随机存储器（RAM）、只读存储器（ROM）等为常见的存储器
ROM	指	Read-OnlyMemory，只读内存；是一种只能读出事先所存数据的固态半导体存储器
DRAM	指	DynamicRandomAccessMemory，即动态随机存取存储器，其通常以一个电容和一个晶体管为一个单元排成二维矩阵，主要的作用原理是利用电容内存储电荷的多寡来代表一个二进制比特（bit）是1还是0；是用来加载各式各样的程序与数据以供CPU直接运行与运用的内部存储器
SRAM	指	StaticRandom-AccessMemory，静态随机存取存储器，这种存储器只要保持通电，里面储存的数据就可以恒常保持，但当电力供应停止后，存储的数据会消失
闪存	指	FlashMemory，全称为快闪存储芯片，是一种非易失性（即断电后存储信息不会丢失）半导体存储芯片，具备反复读取、擦除、写入的技术属性，属于存储器中的大类产品；相对于硬盘等机械磁盘，具备读取速度快、功耗低、抗震性强、体积小的应用优势；相对于随机存储器，具备断电存储的应用优势；目前闪存广泛应用于手持移动终端、消费类电子产品、个人电脑及其周边、通信设备、医疗设备、办公设备、汽车电子及工业控制设备等领域
NORFlash	指	代码型闪存芯片，主要非易失闪存技术之一
NANDFlash	指	数据型闪存芯片，主要非易失闪存技术之一
3DNAND	指	是一种新兴的闪存类型，通过把存储单元堆叠在一起来解决2D或者平面NAND闪存带来的限制
eMMC	指	EmbeddedMultiMediaCard的缩写，一种内嵌式存储器标准，主要针对手机产品；eMMC的主要优势是集成了一个控制器，提供标准接口并管理闪存，使手机设计者免受闪存不断升级的影响，专注于产品其它部分的开发，缩短产品开发周期
UFS	指	UniversalFlashStorage的缩写，即通用闪存存储，是一种内嵌式存储器的标准规格和符合该标准的存储产品
SSD	指	SolidStateDisk的缩写，即固态硬盘（区别于机械磁盘），用固态电子存储芯片阵列而制成的硬盘，一般包括控制单元和存储单元（Flash或DRAM），存储单元负责存储数据，控制单元承担数据的读取、写入
PCIe	指	PCI-Express（peripheralcomponentinterconnectexpress）的缩写，是一种针对包括显卡、无线网卡、固态硬盘等硬件设备在内的高速串行计算机扩展总线标准
SATA	指	SerialAdvancedTechnologyAttachment的英文缩写，中文名称为串行高级技术附件，是一种硬盘接口规范
PSSD	指	移动硬盘，主要指采用USB或IEEE1394接口，可以随时插上或拔下，小巧而便于携带的硬盘存储器，可以较高的速度与系统进行数据传输
SD卡	指	SecureDigitalMemoryCard的缩写，中文称为安全数码卡，一种基于NANDFlash的存储设备，广泛应用于数码相机等便携式装置。
CF卡	指	CompactFlashCard的缩写，是一种用于便携式电子设备的数据存储设备
NM卡	指	NanoMemoryCard的缩写，是华为自创的一种超微型存储卡，与SD存储卡相比，体积更小，和NanoSIM卡的规格几乎完全相同
FPGA	指	FieldProgrammableGateArray，现场可编程门阵列，其作用在于模拟硬件功能，从而验证集成电路设计功能
SoC	指	SystemOnChip的缩写，中文称为系统级芯片，通常指将微处理器、模拟IP核、数字IP核和存储器等集成于单一芯片的集成电路
晶圆（wafer）	指	经过特定工艺加工，具备特定电路功能的硅半导体集成电路圆片，经切割、封装等工艺后可制作成IC成品
存储晶圆、存储颗粒	指	指经过切割、萃取后的单颗存储芯片
NormalWafer	指	存储原厂对外销售的完整的NANDFlash存储晶圆Wafer，通常在行业内被称之为NormalWafer
PartialWafer	指	原始的NormalWafer已经过切割萃取，高品质的存储颗粒已被筛选销售给对性能需求较高的客户，Wafer中仅保留了相对低品质的存储颗粒，用于相对性能需求较低的产品生产，通常在行业内被称之为PartialWafer
nm	指	Nanometer的缩写，中文称纳米，长度计量单位，1纳米为10亿分之1米，约相当于4倍原子大小
存储密度、存储当量	指	总体的存储容量
IOPS	指	Input/OutputOperationsPerSecond的缩写，是一个用于计算机存储设备或存储区域网络性能测试的量测方式，可以视为是每秒的读写次数
OTP	指	OneTimeProgrammable是一种一次可编程的存储器类型，其主要特点是只能编程一次，写入一次之后将不可再次更改和清除。因此具有保护重要数据的特点
bit	指	比特，是英文binarydigit的缩写。比特是表示信息的最小单位，是二进制数的一位包含的信息或2个选项中特别指定1个的需要信息量
Byte	指	一般指字节,是计算机信息技术用于计量存储容量的一种计量单位，1Byte=8bits
流片	指	集成电路设计完成后，将电路图转化为芯片的试生产或生产过程
MPW	指	MultiProjectWafer，多项目晶圆，将多个使用相同工艺的集成电路设计放在同一晶圆片上流片，制造完成后，每个设计可以得到数十片芯片样品，即指芯片的试投片
晶圆测试	指	CHIPPROBING，简称CP晶圆测试，目的在于针对芯片作电性功能上的测试，使IC在进入封装前先行过滤出电性功能不良的芯片
存储晶圆/颗粒测试	指	DieSorting，在存储行业内简称测Die，即芯片电特性拣选工序，通过运用测试工具、匹配存储管理方案，对单颗存储颗粒中的坏块、容量、ID进行快速检测分析，以达到初拟检验、区分该存储颗粒是否可以使用，初步确定die容量品质等级重要信息或指标，主控芯片会根据这些信息完善对存储颗粒的特性和算法上的管理
封装	指	芯片安装、固定、密封的工艺过程发挥着实现芯片电路管脚与外部电路的连接，并防止外界杂质腐蚀芯片电路的作用
光罩	指	又称光掩模版、掩膜版，英文名称MASK或PHOTOMASK，在制作IC的过程中，利用光蚀刻技术，在半导体上形成图型，为将图型复制于晶圆上
晶圆厂	指	芯片代工厂，指专门负责芯片制造的厂家
存储原厂	指	三星电子（SAMSUNG）、海力士（SKHynix）/英特尔（Intel）、美光（Micron）、西部数据/闪迪（SanDisk）和铠侠（KIOXIA）以及长江存储（YMTC）等存储芯片生产原厂
5G	指	5th-Generation，即第五代移动电话行动通信标准
CFM	指	ChinaFlashMarket的缩写（中国闪存市场），是国内权威的存储市场资讯平台,专业提供闪存行业产品价格、信息咨询、产品顾问、产业分析等商业资讯
IDC	指	InternationalDataCorporation的缩写，是信息技术、电信行业和消费科技咨询、顾问和活动服务专业提供商
GB	指	英文GigaByte，简称GB，吉咖字节，计算机存储容量单位，用于标示硬盘、存储器等具有较大容量的储存媒介之储存容量
ZB	指	英文ZettaByte，简称ZB，泽字节，计算机存储容量单位，1泽字节=1,099,511,627,776.00GB
