# Supplementary material
Source: ML conference proceedings conference paper supplement (https://openreview.net/forum?id=xg0fmtqh8d)
Supplement: supplementary_material [file 470_学大教育:关于股东股份解除质押的公告.xlsx]

## Sheet: Sheet1
股东名称	持股数量 (股)	持股比 例	累计被质押 股份数量 (股)	占其所持股 份比例	占公司 总股本 比例	已质押股份 情况		未质押股份 情况
						已质押股份限售和冻结数量	占已质押股份比例	未质押股份限售和冻结数量	占未质押股份比例
浙江台州椰林湾投资策划有限公司	12,449,032	10.10%	12,449,032	100.00%	10.10%	0	0.00%	0	0.00%
天津安特文化传播有限公司	10,591,672	8.6%	4,980,000	47.02%	4.04%	0	0.00%	0	0.00%
天津晋丰文化传播有限公司	5,995,328	4.87%	0	0.00%	0.00%	0	0.00%	0	0.00%
天津瑜安企业管理合伙企业(有限合伙)	1,299,800	1.05%	0	0.00%	0.00%	0	0.00%	0	0.00%
合计	30,335,832	24.62%	17,429,032	57.45%	14.14%	0	0.00%	0	0.00%
