# Supplementary material
Source: ML conference proceedings conference paper supplement (https://openreview.net/forum?id=xg0fmtqh8d)
Supplement: supplementary_material [file 471_中钢国际:关于国有股权无偿划转暨直接控股股东变更的提示性公告.xlsx]

## Sheet: Sheet
股东名称	权益变动前		权益变动后
	持股数量（股）	持股比例	持股数量（股）	持股比例
中钢集团	247,723,642	17.27%	0	0
中钢股份	406,262,246	28.32%	0	0
中钢资产	44,016,017	3.07%	0	0
中钢资本	0	0	698,001,905	48.66%
合计	698,001,905	48.66%	698,001,905	48.66%
