# Supplementary material
Source: ML conference proceedings conference paper supplement (https://openreview.net/forum?id=xg0fmtqh8d)
Supplement: supplementary_material [file 472_世界华文媒体:2024年6月30日止第1季度财务报告.xlsx]

## Sheet: Sheet
	本公司擁有人應佔
	股本	股份溢價千美元	其他儲備千美元	保留溢利千美元	小計千美元	非控股權益千美元	權益總額千美元
於2023年4月1日	千美元 21,715	54,664	(123,915)	200,850	153,314	(750)	152,564
期間虧損	-	-	-	(2,728)	(2,728)	(175)	(2,903)
其他全面(虧損)/收益
可能於隨後時間重新分類至損益之項目：
貨幣換算差額	-	-	(7,326)	-	(7,326)	(3)	(7,329)
不會於隨後時間重新分類至損益之項目：
按公平值經其他全面收益入賬之金融資產公平值變動	-	-	(89)	-	(89)	(33)	(122)
除稅後之其他全面虧損	-	-	(7,415)	-	(7,415)	(36)	(7,451)
截至2023年6月30日止期間之全面虧損總額	-	-	(7,415)	(2,728)	(10,143)	(211)	(10,354)
於權益直接確認之與擁有人交易總額
2022/2023年度中期股息	-	-	-	(2,531)	(2,531)	-	(2,531)
於2023年6月30日	21,715	54,664	(131,330)	195,591	140,640	(961)	139,679
於2024年4月1日	21,715	54,664	(133,381)	185,335	128,333	(1,693)	126,640
期間虧損	-	-	-	(841)	(841)	(191)	(1,032)
其他全面(虧損)/收益
可能於隨後時間重新分類至損益之項目：
貨幣換算差額	-	-	342	-	342	(3)	339
不會於隨後時間重新分類至損益之項目：
按公平值經其他全面收益入賬之金融資產公平值變動	-	-	67	-	67	25	92
除稅後之其他全面收益	-	-	409	-	409	22	431
截至2024年6月30日止期間之全面收益/(虧損)總額	-	-	409	(841)	(432)	(169)	(601)
於權益直接確認之與擁有人交易總額
2023/2024年度中期股息	-	-	-	(2,531)	(2,531)	-	(2,531)
回購普通股	-	-	-	(149)	(149)	-	(149)
	-	-	-	(2,680)	(2,680)		(2,680)
於2024年6月30日	21,715	54,664	(132,972)	181,814	125,221	(1,862)	123,359
