# Supplementary material
Source: ML conference proceedings conference paper supplement (https://openreview.net/forum?id=xg0fmtqh8d)
Supplement: supplementary_material [file 473_中信股份:公告-中信证券股份有限公司2024年中期业绩公告.xlsx]

## Sheet: Sheet
	期初普通賬戶、信用賬戶持股		期初轉融通出借股份且尚未歸還		期末普通賬戶、信用賬戶持股		期末轉融通出借股份且尚未歸還
股東名稱(全稱)	數量合計	比例 (%)	數量合計	比例 (%)	數量合計	比例(%)	數量合計	比例(%)
中國建設銀行股份有限公司—國泰中證全指證券公司交易型開放式指數證券投資基金	210,325,343	1.42	1,630,000	0.01	219,910,723	1.48	708,900	0.005
