# Supplementary material
Source: ML conference proceedings conference paper supplement (https://openreview.net/forum?id=xg0fmtqh8d)
Supplement: supplementary_material [file 474_维信诺:维信诺科技股份有限公司审阅报告.xlsx]

## Sheet: Sheet
授予对象类别	期末发行在外的股票期权		期末发行在外的其他权益工具
	行权价格的范围	合同剩余期限	行权价格的范围	合同剩余期限
管理人员	9.49元/股、6.05元/股	9.49元/股，合同剩余期限16个月；6.05元/股，合同剩余期限为12个月	4.75元/股、3.03元/股	4.75元/股，合同剩余期限17个月；3.03元/股，合同剩余期限12个月
销售人员	9.49元/股、6.05元/股	9.49元/股，合同剩余期限16个月；6.05元/股，合同剩余期限为12个月	4.75元/股、3.03元/股	4.75元/股，合同剩余期限17个月；3.03元/股，合同剩余期限12个月
研发人员	9.49元/股、6.05元/股	9.49元/股，合同剩余期限16个月；6.05元/股，合同剩余期限为12个月	4.75元/股、3.03元/股	4.75元/股，合同剩余期限17个月；3.03元/股，合同剩余期限12个月
生产人员	9.49元/股、6.05元/股	9.49元/股，合同剩余期限16个月；6.05元/股，合同剩余期限为12个月	4.75元/股、3.03元/股	4.75元/股，合同剩余期限17个月；3.03元/股，合同剩余期限12个月
