# Supplementary material
Source: ML conference proceedings conference paper supplement (https://openreview.net/forum?id=xg0fmtqh8d)
Supplement: supplementary_material [file 475_鞍钢股份:回购注销部分限制性股票.xlsx]

## Sheet: Sheet
	回購前		回購後
股份性質	股份數量	佔總股本比例(%)	增減變動股份數量	股份數量	佔總股本比例(%)
有限售條件A股	14,588,562	0.16	-14,180,048	408,514	0.00
無限售條件股份	9,368,812,744	99.84	0	9,368,812,744	100.00
-A股	7,957,272,744	84.80	0	7,957,272,744	84.93
-H股	1,411,540,000	15.04	0	1,411,540,000	15.07
股份總數	9,383,401,306	100.00	-14,180,048	9,369,221,258	100.00
