# Supplementary material
Source: ML conference proceedings conference paper supplement (https://openreview.net/forum?id=xg0fmtqh8d)
Supplement: supplementary_material [file 476_四川成渝高速公路:I.须予披露及关连交易-收购协议;II.申请清洗豁免;及III.恢复H股买卖.xlsx]

## Sheet: Sheet
		於本公告日的持股情況			於緊隨建議收購事項完成後的持股情況
股東名稱	股份類別	股份數目	佔相關類別已發行股本的概約百分比(%)	佔已發行股本總額的百分比(%)	股份數目	佔相關類別已發行股本的概約百分比(%)	佔已發行股本總額的百分比(%)
蜀道投資及其一致 動人士（包括蜀道創投）（附註3及4）	A 股	1,035,915,462	47.90	33.87	1,475,037,218	56.69	42.18
	H 股	183,064,200	20.45	5.99	183,064,200	20.45	5.23
小計：	A 股 +H 股	1,218,979,662	–	39.86	1,658,101,418	–	47.41
招商公路(附註3及5)	A股	664,487,376	30.72	21.73	664,487,376	25.54	19.00
佳選控股有限公司(附註3及5)	H股	96,458,000	10.77	3.15	96,458,000	10.77	2.76
小計:	A股+H股	760,945,376	–	24.88	760,945,376	–	21.76
A股公眾股東	A股	462,337,162	21.38	15.12	462,337,162	17.77	13.22
H股公眾股東	H股	615,797,800	68.78	20.14	615,797,800	68.78	17.61
小計:	A股+H股	1,078,134,962	–	35.26	1,078,134,962	–	30.83
總計:		3,058,060,000	–	100	3,497,181,756	–	100
