# Supplementary material
Source: ML conference proceedings conference paper supplement (https://openreview.net/forum?id=xg0fmtqh8d)
Supplement: supplementary_material [file 477_广发证券:关于召开2024年第一次临时股东大会的提示性公告.xlsx]

## Sheet: Sheet
原条款		新条款		修订依据
条目	条款内容	条目	条款内容
第一条	为了规范广发证券股份有限公司（以下简称“公司”）的关联交易行为，维护公司股东特别是中小投资者和公司债权人的合法权益，根据《中华人民共和国公司法》《中华人民共和国证券法》《深圳证券交易所股票上市规则》《香港联合交易所有限公司证券上市规则》（以下简称“《香港上市规则》”）等有关法律法规、部门规章、规范性文件及《广发证券股份有限公司章程》（以下简称“《公司章程》”）的有关规定，制定本制度。	第一条	为了规范广发证券股份有限公司（以下简称“公司”）的关联交易行为，维护公司股东特别是中小投资者和公司债权人的合法权益，根据《中华人民共和国公司法》《中华人民共和国证券法》《上市公司独立董事管理办法》《深圳证券交易所股票上市规则》《深圳证券交易所上市公司自律监管指引第1号——主板上市公司规范运作》《香港联合交易所有限公司证券上市规则》（以下简称“《香港上市规则》”）等有关法律法规、部门规章、规范性文件及《广发证券股份有限公司章程》（以下简称“《公司章程》”）的有关规定，制定本制度。	根据新颁布或修订的外规修订，如《上市公司独立董事管理办法》《深圳证券交易所上市公司自律监管指引第1号——主板上市公司规范运作》等。
第十一条	…… 根据《香港上市规则》，关连交易是指公司及/或其任何附属公司（以下简称“本集团”）与关连人士之间进行的交易；以及与第三方进行的指定类别交易，而该交易可令关连人士透过其于交易所涉及实体的权益而获得利益。关连交易可以是一次性的交易或持续性的交易。持续性关连交易为日常业务中预期在一段时间内持续或经常发生的涉及提供货物、服务或财务资助的关联交易。“交易”包括资本性质和收益性质的交易，不论该交易是否在本集团的日常业务中进行，而包括以下类别的交易： …… （六）发行公司或其附属公司的新证券，包括包销或分包销证券发行； ……	第十一条	…… 根据《香港上市规则》，关连交易是指公司及/或其任何附属公司（以下简称“本集团”）与关连人士之间进行的交易；以及与第三方进行的指定类别交易，而该交易可令关连人士透过其于交易所涉及实体的权益而获得利益。关连交易可以是一次性的交易或持续性的交易。持续性关连交易为日常业务中预期在一段时间内持续或经常发生的涉及提供货物、服务或财务资助的关连交易。“交易”包括资本性质和收益性质的交易，不论该交易是否在本集团的日常业务中进行，而包括以下类别的交易： …… （六）公司或其附属公司发行新证券、或出售或转让库存股份，包括包销或分包销证券发行或库存股份出售或转让； ……	根据《香港上市规则》第14A.24（6）条修订，并优化表述。
第十八条	公司与关联自然人发生的交易金额在30万元人民币以上的关联交易，应当及时披露；交易金额在300万元人民币以上、且占公司最近一期经审计净资产绝对值0.05%以上的，并应提交董事会批准；交易金额在3000万元人民币以上、且占公司最近一期经审计净资产绝对值0.5%以上的，并应提交股东大会批准。	第十八条	公司与关联自然人发生的交易金额在30万元人民币以上的关联交易，应当提交董事会批准并及时披露；交易金额在3000万元人民币以上、且占公司最近一期经审计净资产绝对值0.5%以上的，并应提交股东大会批准。	根据《上市公司独立董事管理办法》第二十三条及《深圳证券交易所股票上市规则》第6.3.6条修订。
第十九条	公司与关联法人（或者其他组织）发生的交易金额在300万元人民币以上、且占公司最近一期经审计净资产绝对值0.5%以上的关联交易，应当及时披露；交易金额在1000万元人民币以上、且占公司最近一期经审计净资产绝对值1%以上的，并应提交董事会批准；交易金额在3000万元人民币以上、且占公司最近一期经审计净资产绝对值2.5%以上的，并应提交股东大会批准。	第十九条	公司与关联法人（或者其他组织）发生的交易金额在300万元人民币以上、且占公司最近一期经审计净资产绝对值0.5%以上的关联交易，应当提交董事会批准并及时披露；交易金额在3000万元人民币以上、且占公司最近一期经审计净资产绝对值2.5%以上的，并应提交股东大会批准。	根据《上市公司独立董事管理办法》第二十三条及《深圳证券交易所股票上市规则》第6.3.6条修订。
第二十条	公司审议需独立董事事前认可的关联交易事项时，公司应及时通过董事会秘书将相关材料提交独立董事进行事前认可。独立董事在作出判断前，可以聘请中介机构出具独立财务顾问报告，作为其判断的依据，相关费用由公司承担。	第二十条	本制度规定应当披露的关联交易事项，应当经独立董事专门会议审议、公司全体独立董事过半数同意后，提交董事会审议。公司应及时通过董事会秘书将相关材料提交独立董事。独立董事在作出判断前，可以聘请中介机构出具独立财务顾问报告，作为其判断的依据，相关费用由公司承担。	根据《上市公司独立董事管理办法》第二十三条、第二十四条修订。
第二十七条	…… （一）完全豁免的关连交易须遵守本制度第二十八条年度审核的有关规定。 （二）部分豁免的一次性关连交易须遵守本条第（三） （1）（A）款公告的处理原则，及本条第（三）（1）（F）款申报的处理原则。部分豁免的持续性关连交易须遵守本条第（三）（2）（A）款的处理原则。 ……	第二十七条	…… （一）完全豁免的关连交易可豁免遵守股东批准、年度审阅及所有披露规定。 （二）部分豁免的一次性关连交易须遵守本条第（三）（1）（A）款公告的处理原则，及本条第（三）（1）（F）款申报的处理原则。部分豁免的持续性关连交易须遵守本条第（三）（2）款的处理原则（可豁免遵守股东批准）。 ……	根据《香港上市规则》第14A.74 条修订。
第二十八条	年度审核的要求如下： …… （三）公司必须于其年度报告付印至少 10 个工作日前，将审计师函件副本送交香港联交所。 （四）公司必须容许（并确保持续关连交易的对手方容许）审计师查核上述各方的账目记录，以便审计师就该等交易作出报告。 （五）如独立非执行董事及╱或审计师未能按规定确认有关事宜，公司必须尽快通知香港联交所及刊登公告。香港联交所或要求公司重新遵守公告及股东批准的规定，亦可能施加其他条件。 （六）如本集团签订了一份有固定期限及固定条款的协议，而该协议涉及： ……	第二十八条	年度审核的要求如下： …… （三）公司必须容许（并确保持续关连交易的对手方容许）审计师查核上述各方的账目记录，以便审计师就该等交易作出报告。 （四）如独立非执行董事及╱或审计师未能按规定确认有关事宜，公司必须尽快通知香港联交所及刊登公告。香港联交所或要求公司重新遵守公告及股东批准的规定，亦可能施加其他条件。 （五）如本集团签订了一份有固定期限及固定条款的协议，而该协议涉及： ……	根据《香港上市规则》第14A.57 条修订。
第二十九条	公司披露关联交易事项时，应当向深圳证券交易所提 交以下文件： …… （三）董事会决议、决议公告文稿和独立董事意见（如 适用）； ……	第二十九条	公司披露关联交易事项时，应当向深圳证券交易所提 交以下文件： …… （三）董事会决议、决议公告文稿和独立董事专门会 议决议； ……	根据《深圳证券交易所上市公司自律监管指引第 1 号— —主板上市公司规范运作》 第 3.5.21 条修订。
第三十条	公司在深圳证券交易所披露的关联交易公告应当包括以下内容： …… （九）独立董事事前认可和独立意见； ……	第三十条	公司在深圳证券交易所披露的关联交易公告应当包括以下内容： …… （九）独立董事过半数同意意见； ……	根据《深圳证券交易所上市公司自律监管指南第 2 号——公告格式》修订。
附录（四）	“关连人士”包括： …… 此外，香港联交所可不时决定某些人士或实体应被视为中国发行人的关连人士（就上市规则第 14A 章的关连交易规定而言）。香港联交所一般不会视中国政府机关为上市发行人的关连人士。但是，香港联交所或会要求上市公司解释其与某个中国政府机关之间的关系，以及不应将该政府机关视为关连人士之理由。如香港联交所决定该中国政府机关应被视作为关连人士，则上市公司必须遵守因此而产生的任何附加责任。	附录（四）	“关连人士”包括： …… 香港联交所一般不会视中国政府机关为上市发行人的关连人士。但是，香港联交所或会要求上市公司解释其与某个中国政府机关之间的关系，以及不应将该政府机关视为关连人士之理由。如香港联交所决定该中国政府机关应被视作为关连人士，则上市公司必须遵守因此而产生的任何附加责任。	根据《香港上市规则》第19A.19 条 修订。
