# Supplementary material
Source: ML conference proceedings conference paper supplement (https://openreview.net/forum?id=xg0fmtqh8d)
Supplement: supplementary_material [file 478_华夏航空:2024年员工持股计划.xlsx]

## Sheet: Sheet
姓名	职务	拟持有份额上限对应的标的股票数量（万股）	拟持有份额占本员工持股计划比例（%）
吴龙江	董事、首席执行官	25.90	5.59%
李三生	总裁	24.00	5.18%
俸杰	董事会秘书、副总裁	23.20	5.01%
张静波	财务总监	23.00	4.97%
张红军	副总裁	23.00	4.97%
邢宗熙	监事会主席	14.00	3.02%
柳成兴	监事	5.80	1.25%
核心骨干员工（44人）		324.1299	70.00%
合计		463.0299	100.00%
