# Supplementary material
Source: ML conference proceedings conference paper supplement (https://openreview.net/forum?id=xg0fmtqh8d)
Supplement: supplementary_material [file 479_上海电气:截至二零二三年十二月三十一日之全年业绩公告.xlsx]

## Sheet: Sheet
		截至十二月三十一日止年度
	附註	二零二三年人民幣千元	二零二二年人民幣千元
一、營業總收入		114,797,077	117,623,118
其中：營業收入	5	114,218,209	116,985,807
利息收入	5	576,469	636,982
手續費及傭金收入	5	2,399	329
二、營業總成本		(112,567,499)	(117,467,341)
其中：營業成本	5、6	(93,117,308)	(98,496,897)
利息支出	5、6	(86,519)	(87,168)
手續費及傭金支出	5、6	(719)	(754)
稅金及附加		(706,729)	(531,757)
銷售費用	6	(4,209,744)	(3,853,301)
管理費用	6	(7,995,268)	(8,167,949)
研發費用	6	(5,369,294)	(5,028,466)
財務費用-淨額		(1,081,918)	(1,301,049)
其中：利息費用		(1,832,613)	(1,757,576)
利息收入		642,243	504,533
加：其他收益		1,474,030	1,077,991
投資收益		2,567,300	1,113,637
其中：對聯營企業和合營企業的投資收益		1,025,375	858,533
以攤余成本計量的金融資產終止確認損失		(22,034)	(8,992)
匯兌收益		9,076	21,394
公允價值變動損失		(314,787)	(715,315)
資產減值損失		(2,275,011)	(2,144,917)
信用減值損失		(1,182,059)	(2,093,465)
資產處置收益		847,003	560,440
三、營業利潤/(虧損)		3,355,130	(2,024,458)
加：營業外收入		142,280	223,041
減：營業外支出		(202,601)	(173,881)
四、利潤/(虧損)總額	7	3,294,809	(1,975,298)
減：所得稅費用		(1,139,883)	(337,708)
五、淨利潤/(虧損)		2,154,926	(2,313,006)
其中：同一控制下企業合併中被合併 方在合併前實現的淨利潤		-	-
歸屬於母公司股東的淨利潤/(虧損)		285,155	(3,566,484)
少數股東損益		1,869,771	1,253,478
六、其他綜合收益的稅後淨額		48,750	489,995
歸屬於母公司股東的其他綜合收益的稅後淨額		46,492	484,938
以後不能重分類計入損益的其他綜合收益		(2,488)	22,390
重新計量設定受益計劃淨負債或淨資產的變動		(2,488)	22,390
以後將重分類計入損益的其他綜合收益		48,980	462,548
其他債權投資公允價值變動		185	(10,419)
應收款項融資公允價值變動		-	-
其他債權投資及應收款項融資信用減值準備		(12,903)	(15,981)
現金流量套期損益的有效部份		(931)	1,821
外幣財務報表折算差額		62,629	487,127
境外淨投資套期		-	-
歸屬於少數股東的其他綜合收益的稅後淨額		2,258	5,057
七、綜合收益總額		2,203,676	(1,823,011)
歸屬於母公司股東的綜合收益總額		331,647	(3,081,546)
歸屬於少數股東的綜合收益總額		1,872,029	1,258,535
八、每股收益
基本每股收益(人民幣元)	8	0.018元	(0.228)元
稀釋每股收益(人民幣元)	8	0.018元	(0.228)元
