# Supplementary material
Source: ML conference proceedings conference paper supplement (https://openreview.net/forum?id=xg0fmtqh8d)
Supplement: supplementary_material [file 480_渣打集团:管理层中期报告-二_二四年第一季度业绩.xlsx]

## Sheet: Sheet
	二〇二四年 第一季度 百萬元	二〇二三年 第一季度 百萬元	變動 1 %
基本表現
經營收入	5,152	4,396	17
經營支出 (包括英國銀行徵費)	(2,786)	(2,675)	(4)
信貸減值	(176)	(26)	nm^8
其他減值	(60)	–	nm^8
聯營公司及合營企業之 (虧損) ╱溢利	(1)	11	nm^8
除稅前溢利	2,129	1,706	25
普通股股東應佔溢利2	1,393	1,076	29
普通股股東有形權益回報 (%)	15.2	11.9	330個基點
成本對收入比率 (不包括銀行徵費) (%)	54.1	60.9	680個基點
列賬基準表現7
經營收入	5,130	4,560	13
經營支出	(2,997)	(2,750)	(9)
信貸減值	(165)	(20)	nm^8
其他減值	(60)	–	nm^8
聯營公司及合營企業之溢利	6	18	nm^8
除稅前溢利	1,914	1,808	6
稅項	(519)	(464)	(12)
本期間溢利	1,395	1,344	4
母公司股東應佔溢利	1,403	1,341	5
普通股股東應佔溢利2	1,223	1,163	5
普通股股東有形權益回報 (%)	13.5	13.0	50個基點
成本對收入比率 (包括銀行徵費) (%)	58.4	60.3	190個基點
淨息差 (%) (經調整) 6	1.76	1.63	13個基點
資產負債表及資本
總資產	812,525	820,678	(1)
權益總額	50,839	50,011	2
普通股股東應佔平均有形權益2	36,510	36,269	1
客戶貸款及墊款	283,403	300,627	(6)
客戶存款	459,386	462,169	(1)
風險加權資產	252,116	250,893	–
總資本	52,538	52,318	–
總資本 (%)	20.8	20.9	(10)個基點
普通股權一級資本	34,279	34,402	–
普通股權一級資本比率 (%)	13.6	13.7	(10)個基點
墊款對存款比率 (%) 3	54.3	56.2	(2.0)
流動性覆蓋比率 (%)	146	161	(15)
槓桿比率 (%)	4.8	4.7	10個基點
每股普通股資料	仙	仙	變動 1
每股盈利 — 基本4	52.9	37.6	15.3
— 列賬基準4	46.5	40.7	5.8
每股資產淨值	1,626	1,505	121
每股有形資產淨值5	1,390	1,297	93
期末普通股數目 (百萬股)	2,610	2,833	(8)
