# Supplementary material
Source: ML conference proceedings conference paper supplement (https://openreview.net/forum?id=xg0fmtqh8d)
Supplement: supplementary_material [file 481_东莞农商银行:2023年度社会责任报告(环境、社会及管治报告).xlsx]

## Sheet: Sheet
指標	單位	2023年	2022年	2021年
集團總員工人數	人	7,924	8,009	7,962
男性員工人數	人	4,663	4,716	4,732
女性員工人數	人	3,261	3,293	3,230
男性員工比例	%	58.85	58.88	59.43
女性員工比例	%	41.15	41.12	40.57
兼職員工人數	人	0	0	0
全職員工人數	人	7,924	8,009	7,962
兼職員工比例	%	0	0	0
全職員工比例	%	100	100	100
30歲以下員工人數	人	1,664	1,680	1,668
30-50歲員工人數	人	5,422	5,455	5,491
50歲以上員工人數	人	838	874	803
30歲以下員工人數比例	%	21.00	20.98	20.95
30-50歲員工人數比例	%	68.43	68.11	68.97
50歲以上員工人數比例	%	10.58	10.91	10.09
總行所在地東莞員工人數	人	5,666	5,725	5,624
省內其他地區員工人數	人	2,199	2,225	2,274
省外員工人數	人	59	59	64
總行所在地東莞員工所占比例	%	71.50	71.48	70.64
省內其他地區員工所占比例	%	27.75	27.78	28.56
省外員工所占比例	%	0.75	0.74	0.80
男性員工流失率	%	1.62	1.99	1.73
女性員工流失率	%	2.23	1.59	2.24
30歲以下員工相比於上一年度流失人數	人	80	55	71
30-50歲以下員工相比於上一年度流失人數	人	64	87	79
50歲以上員工相比於上一年度流失人數	人	5	4	5
30歲以下員工人數流失率	%	4.78	3.29	3.95
30-50歲以下員工人數流失率	%	1.18	1.59	1.46
50歲以上員工人數流失率	%	0.58	0.48	0.64
總行所在地東莞員工流失率	%	1.37	1.41	1.42
省內其他地區員工流失率	%	3.07	2.62	2.98
省外員工流失率	%	5.04	11.38	8.96
工亡人數	人	0	1	0
工亡人數比例	%	0	0.01	0
因工傷損失工作日數	日	563	630	376
