# Supplementary material
Source: ML conference proceedings conference paper supplement (https://openreview.net/forum?id=xg0fmtqh8d)
Supplement: supplementary_material [file 482_甘肃能源:关于控股股东非公开发行可交换公司债券换股进展暨权益变动比例超过1%的公告.xlsx]

## Sheet: Sheet
股份性质	本次变动前持有股份		本次变动后持有股份
	股数(万股)	占总股本比例(%)	股数(万股)	占总股本比例(%)
电投集团	80,004.5606	49.99	78,403.5534	48.99
合计持有股份	80,004.5606	49.99	78,403.5534	48.99
其中：无限售条件股份	80,004.5606	49.99	78,403.5534	48.99
有限售条件股份	0	0	0	0
