# Supplementary material
Source: ML conference proceedings conference paper supplement (https://openreview.net/forum?id=xg0fmtqh8d)
Supplement: supplementary_material [file 483_中国东方航空股份:内幕消息海外监管公告2024年8月运营数据公告.xlsx]

## Sheet: Sheet
序號	機型	廠商	自有	融資租賃	經營租賃	小計
	寬體客機		57	44	5	106
1	B777系列	波音	12	8	0	20
2	B787系列	波音	3	7	0	10
3	A350系列	空客	7	13	0	20
4	A330系列	空客	35	16	5	56
	窄體客機		263	182	214	659
5	A320系列	空客	151	111	113	375
6	B737系列	波音	108	68	101	277
7	C919系列	商飛	4	3	0	7
	支線客機		15	9	0	24
8	ARJ系列	商飛	15	9	0	24
	合計		335	235	219	789
