# Supplementary material
Source: ML conference proceedings conference paper supplement (https://openreview.net/forum?id=xg0fmtqh8d)
Supplement: supplementary_material [file 484_中信股份:公告-中信证券股份有限公司2024年中期业绩公告.xlsx]

## Sheet: Sheet
	2024年6月30日	2023年12月31日
一年以內	292,745	316,030
一至二年	222,601	267,789
二至三年	42,371	124,993
三至四年	19,339	22,113
四至五年	17,267	20,128
五年以上	78,222	126,811
合計	672,545	877,864
