# Supplementary material
Source: ML conference proceedings conference paper supplement (https://openreview.net/forum?id=xg0fmtqh8d)
Supplement: supplementary_material [file 485_五矿资源:截至二零二四年六月三十日止三个月之第二季度生产报告.xlsx]

## Sheet: Sheet
	二零二四年第二季度	二零二四年第二季度 比二零二三年第二季度	二零二四年第二季度相比二零二四年第一季度	二零二四年年初至今	二零二四年年初至今相比二零二三年年初至今
銅(精礦含金屬量，噸)
Las Bambas	70,173	-14%	25%	126,198	-10%
Khoemacau1	8,907	-	-2	9,982	-
Rosebery	346	-1%	16%	643	14%
總計	79,426	-3%	38%	136,823	-2%
電解銅(噸)
Kinsevere	11,546	2%	19%	21,278	-2%
總計	11,546	2%	19%	21,278	-2%
鋅(精礦含金屬量，噸)
Dugald River	34,524	-5%	-23%	79,284	38%
Rosebery	15,776	18%	9%	30,263	31%
總計	50,300	1%	-15%	109,547	36%
鉛(精礦含金屬量，噸)
Dugald River	4,618	8%	-25%	10,799	65%
Rosebery	5,768	11%	11%	10,970	27%
總計	10,386	9%	-9%	21,769	43%
鉬(精礦含金屬量，噸)
Las Bambas	857	-35%	6%	1,667	-26%
總計	857	-35%	6%	1,667	-26%
鈷(含金屬量，噸)
Kinsevere	788	- -	31%	1,390	-
總計	788		31%	1,390	-
