# Supplementary material
Source: ML conference proceedings conference paper supplement (https://openreview.net/forum?id=xg0fmtqh8d)
Supplement: supplementary_material [file 486_绿色动力环保:董事名单与角色和职能.xlsx]

## Sheet: Sheet
	審計與風險管理委員會	提名委員會	薪酬和考核委員會	戰略委員會
喬德衛				C
胡聲泳		M
劉曙光				M
趙志雄	M
胡天河
燕春旭			M
歐陽戒驕	C		M
鄭志明	M	C
周北海		M	C	M
