# Supplementary material
Source: ML conference proceedings conference paper supplement (https://openreview.net/forum?id=xg0fmtqh8d)
Supplement: supplementary_material [file 487_招商银行:2024年中期业绩公告.xlsx]

## Sheet: Sheet
		歸屬於本行股東權益												非控制性權益
			其他權益工具
	附註	股本	優先股	永續債	資本公積	投資重估儲備	套期儲備	盈餘公積	一般風險準備	未分配利潤	建議分配利潤	外幣財務報表折算差額	小計	普通股少數股東權益	永久債務資本	合計
於2024年1月1日		25,220	27,468	122,978	65,432	13,656	92	108,737	141,481	518,638	49,734	2,934	1,076,370	6,521	2,838	1,085,729
本期增減變動金額		–	–	–	–	9,565	(54)	–	(120)	72,907	(49,734)	1,279	33,843	291	(2,838)	31,296
(一)淨利潤		–	–	–	–	–	–	–	–	74,743	–	–	74,743	543	93	75,379
(二)其他綜合收益		–	–	–	–	9,584	(54)	–	–	–	–	1,279	10,809	32	48	10,889
本期綜合收益總額		–	–	–	–	9,584	(54)	–	–	74,743	–	1,279	85,552	575	141	86,268
(三)所有者投入和減少的資本		–	–	–	–	–	–	–	–	–	–	–	–	–	(2,886)	(2,886)
1.贖回永久債務資本	43(a)	–	–	–	–	–	–	–	–	–	–	–	–	–	(2,886)	(2,886)
(四)利潤分配		–	–	–	–	–	–	–	(120)	(1,855)	(49,734)	–	(51,709)	(284)	(93)	(52,086)
1.轉回一般風險準備	36(b)	–	–	–	–	–	–	–	(120)	120	–	–	–	–	–	–
2.分配2023年度普通股股利	36(a)	–	–	–	–	–	–	–	–	–	(49,734)	–	(49,734)	(284)	–	(50,018)
3.分配永續債利息		–	–	–	–	–	–	–	–	(1,975)	–	–	(1,975)	–	–	(1,975)
4.子公司永久債務資本分配	43(a)	–	–	–	–	–	–	–	–	–	–	–	–	–	(93)	(93)
(五)處置指定為以公允價值計量且其變動計入其他綜合收益的權益工具導致的所有者權益內部結轉		–	–	–	–	(19)	–	–	–	19	–	–	–	–	–	–
於2024年6月30日		25,220	27,468	122,978	65,432	23,221	38	108,737	141,361	591,545	–	4,213	1,110,213	6,812	–	1,117,025
