# Supplementary material
Source: ML conference proceedings conference paper supplement (https://openreview.net/forum?id=xg0fmtqh8d)
Supplement: supplementary_material [file 488_赣锋锂业:2023年股东周年大会.xlsx]

## Sheet: Sheet
姓名	職務	2023年度在公司領取薪酬(人民幣萬元:稅前)
黃華安	監事	19.68
鄒健	監事	8.00
郭華平	監事	8.00
