# Supplementary material
Source: ML conference proceedings conference paper supplement (https://openreview.net/forum?id=xg0fmtqh8d)
Supplement: supplementary_material [file 489_绿色动力环保:公告於二零二四年九月二十日举行之二零二四年第二次临时股东大会的投票表决结果.xlsx]

## Sheet: Sheet
普通決議案		贊成		反對		棄權
		表決股份數目	百分比(%)	表決股份數目	百分比(%)	表決股份數目	百分比(%)
1.	審議並批准二零二四年中期利潤分配方案	840,666,326	99.9782	177,500	0.0211	6,100	0.0007
2.	審議並批准《未來三年股東分紅回報規劃（2024年－2026年）》	840,652,326	99.9765	183,700	0.0218	13,900	0.0017
3.	審議並批准本公司為北京綠色動力環保有限公司置換貸款提供擔保	839,036,524	99.7843	481,200	0.0572	1,332,202	0.1584
普通決議案				表決股份數目		得票數佔出席會議股東所持有表決權股份總數的比例(%)
4.	審議並批准建議委任董事：
(a)	審議及批准委任喬德衛先生為本公司執行董事			838,475,410		99.7176
(b)	審議及批准委任胡聲泳先生為本公司執行董事			838,473,405		99.7174
(c)	審議及批准委任劉曙光先生為本公司執行董事			838,157,322		99.6798
(d)	審議及批准委任趙志雄先生為本公司執行董事			837,971,629		99.6577
(e)	審議及批准委任胡天河先生為本公司執行董事			838,476,426		99.7177
(f)	審議及批准委任燕春旭先生為本公司執行董事			838,961,414		99.7754
5.	審議並批准委任獨立非執行董事：
(a)	審議及批准委任周北海先生為本公司獨立非執行董事			838,242,011		99.6898
(b)	審議及批准委任歐陽戒驕女士為本公司獨立非執行董事			838,521,397		99.7231
(c)	審議及批准委任鄭志明先生為本公司獨立非執行董事			838,547,620		99.7262
6.	審議並批准委任監事：
(a)	審議及批准委任田瑩瑩女士為本公司股東代表監事			838,727,336		99.7476
(b)	審議及批准委任余麗君女士為本公司股東代表監事			838,250,036		99.6908
