# Supplementary material
Source: ML conference proceedings conference paper supplement (https://openreview.net/forum?id=xg0fmtqh8d)
Supplement: supplementary_material [file 490_中信股份:公告-中信证券股份有限公司2024年中期业绩公告.xlsx]

## Sheet: Sheet
	截至6月30日止六個月
	2024年(未經審計)	2023年(未經審計)
本期淨利潤	10,981,938	11,751,911
其他綜合收益
預計將重分類計入損益的項目
以公允價值計量且其變動計入其他綜合收益的債權投資的淨收益,稅後	837,469	387,306
以公允價值計量且其變動計入其他綜合收益的債權投資在處置時重分類至損益的淨虧損，稅後	(947,458)	(66,645)
	(109,989)	320,661
按照權益法核算的在被投資單位其他綜合收益中所享有的份額	10,161	12,047
外幣報表折算差額	(789,366)	668,072
	(889,194)	1,000,780
預計不能重分類計入損益的項目
指定為以公允價值計量且其變動計入其他綜合收益的權益工具投資的淨損益,稅後	1,179,550	(6,873)
按照權益法核算的在被投資單位其他綜合收益中所享有的份額	—	—
其他	(1,558)	(6,061)
	1,177,992	(12,934)
稅後本期其他綜合收益	288,798	987,846
本期綜合收益總額	11,270,736	12,739,757
綜合收益總額歸屬於:
母公司股東	10,860,948	12,261,679
非控制性權益	409,788	478,078
	11,270,736	12,739,757
