# Supplementary material
Source: ML conference proceedings conference paper supplement (https://openreview.net/forum?id=xg0fmtqh8d)
Supplement: supplementary_material [file 491_维信诺:维信诺科技股份有限公司审阅报告.xlsx]

## Sheet: Sheet
关联方	关联交易内容	本期发生额	上期发生额	备注
广州国显	产品采购、接受技术服务	4,267,274,251.49	4,981,020,045.60	协议约定
合肥电子	产品采购、委托加工	178,430,670.43	154,153.33	协议约定
固安九通基业公用事业有限公司	水费、污水处理费等	8,950,127.25	17,132,900.62	协议定价
幸福基业物业服务有限公司固安分公司	物业保洁服务等	293,726.52	655,293.30	协议定价
固安幸福基业资产管理有限公司福朋酒店	住宿费等	-	4,609.73	协议定价
成都辰显	委托加工	475,752.21	1,434,690.27	协议定价
合计		4,455,424,527.90	5,000,401,692.85
