# Supplementary material
Source: ML conference proceedings conference paper supplement (https://openreview.net/forum?id=xg0fmtqh8d)
Supplement: supplementary_material [file 492_山东黄金:2023年度环境、社会与治理(ESG)暨社会责任报告.xlsx]

## Sheet: Sheet
指標		2023年
員工總數（人）		17,602
按僱傭類型劃分員工人數（人）	全職	17,602
	兼職	0
員工流失率（%）		5.61%
勞動合同覆蓋率（%）		100%
社保覆蓋率（%）		100%
