# Supplementary material
Source: ML conference proceedings conference paper supplement (https://openreview.net/forum?id=xg0fmtqh8d)
Supplement: supplementary_material [file 493_德明利:深圳市德明利技术股份有限公司向特定对象发行股票并在主板上市募集说明书(修订稿).xlsx]

## Sheet: Sheet
公司名称	营业收入			归属于母公司股东的净利润/本期净利			扣除非经常性损益后的归属于母公司股东的净利润
	2023年度	上年同期	变动比例	2023年度	上年同期	变动比例	2023年度	上年同期	变动比例
群联电子	4,822,163.00	6,025,614.20	-19.97%	362,442.80	540,114.60	-32.90%	未披露	未披露	未披露
朗科科技	108,759.75	177,214.02	-38.63%	-4,376.42	6,213.40	-170.44%	-5,182.99	4,382.15	-218.28%
江波龙	1,012,511.19	832,993.43	21.55%	-82,780.94	7,279.70	-1237.15%	-88,210.37	3,784.43	-2430.88%
佰维存储	359,075.22	298,569.27	20.27%	-62,435.89	7,121.87	-976.68%	-64,175.78	6,578.26	-1075.57%
发行人	177,591.28	119,065.65	49.15%	2,499.85	6,749.99	-62.97%	1,493.67	1,148.41	30.06%
