# Supplementary material
Source: ML conference proceedings conference paper supplement (https://openreview.net/forum?id=xg0fmtqh8d)
Supplement: supplementary_material [file 494_康希诺生物:2023年环境、社会及管治(ESG)暨社会责任报告.xlsx]

## Sheet: Sheet
指標	指標說明	頁碼
GRI 2:一般披露 2021	2-1 組織詳細情況	P02-03
	2-2 納入組織可持續發展報告的實體	P01
	2-3 報告期、報告頻率和聯繫人	P01, P111
	2-6 活動、價值鏈和其他業務關係	P01-03, P37-40,P61-62
	2-7 員工	P66-68
	2-8 員工之外的工作者	P39
	2-9 管治架構和組成	P27-29
	2-10 最高管治機構的提名和遴選	P27-29
	2-11 最高管治機構的主席	P27-29
	2-12 在管理影響方面，最高管治機構的監督作用	P27-29
	2-13 為管理影響的責任授權	P11-12, P27-29
	2-14 最高管治機構在可持續發展報告中的作用	P08-12, P27-29
	2-15 利益衝突	P33-35
	2-16 重要關切問題的溝通	P14-15
	2-17 最高管治機構的共同知識	P29
	2-18 對最高管治機構的績效評估	P31
	2-25 補救負面影響的程序	P34, P61-62, P68
	2-26 尋求建議和提出關切的機制	P34, P61-62, P68
	2-27 遵守法律法規	報告期內無有重大違規處罰
	2-28 協會的成員資格	P39
	2-29 利益相關方參與的方法	P14-15
GRI 3：實質性議題2021	3-1 確定實質性議題的過程	P14-15
	3-2 實質性議題清單	P15
	3-3 實質性議題的管理	P15
GRI 203：間接經濟影響2016	3-3 實質性議題的管理	P24-25, P98-102
	203-1 基礎設施投資和支持性服務	P24-25, P98-102
	203-2 重大間接經濟影響	P24-25, P98-102
GRI 204：實踐採購 2016	3-3 實質性議題的管理	P37-40
	204-1 向當地供應商採購的支出比例	P37-39
GRI 205：反腐敗 2016	3-3 實質性議題的管理	P34-35
	205-3 經確認的腐敗事件和採取的行動	P34
GRI 301：物料 2016	3-3 實質性議題的管理	P37-40, P92-93
	301-1 所用物料的重量或體積	P93
GRI 302：能源 2016	3-3 實質性議題的管理	P89, P92-93
	302-1 組織內部的能源消耗量	P93
	302-2 組織外部的能源消耗量	P93
	302-3 能源強度	P93
GRI303：水資源和污水2018	3-3實質性議題的管理	P89,P92-96
	303-1組織與水作為共有資源的相互影響	P92-93
	303-2管理與排水相關的影響	P94-95
	303-3取水	P93
	303-4排水	P96
	303-5耗水	P93
GRI305：排放2016	3-3實質性議題的管理	P87-88,P94-96
	305-1直接（範圍1）溫室氣體排放	P88
	305-2能源間接（範圍2）溫室氣體排放	P88
	305-4溫室氣體排放強度	P88
	305-7氮氧化物（NO）、硫氧化物（SO）和其他重大XX氣體排放	P96
GRI306：廢棄物2020	3-3實質性議題的管理	P94-96
	306-1廢棄物的產生及廢棄物相關重大影響	P94-95
	306-3產生的廢棄物	P96
GRI308：供應商環境評估2016	3-3實質性議題的管理	P38-40
	308-1使用環境評價維度篩選的新供應商	P40
	308-2供應鏈的負面環境影響以及採取的行動	無
GRI401：僱傭2016	3-3實質性議題的管理	P66,P68,P77-78
	401-1新進員工僱傭率和員工流動率	P67-68
	401-2提供給全職員工（不包括臨時或兼職員工）的福利	P75-76
GRI403：職業健康與安全2018	3-3實質性議題的管理	P79-82
	403-1 職業健康安全管理體系	P79
	403-2 危害識別、風險評估和事故調查	P80
	403-3 職業健康服務	P80-81
	403-5 工作者職業健康安全培訓	P81-82
	403-6 促進工作者健康	P80-82
	403-7 預防和減緩與業務關係直接相關的職業健康安全影響	P80
	403-9 工傷	P79
GRI 404：培訓與教育2016	3-3 實質性議題的管理	P69-74
	404-1 每名員工每年接受培訓的平均小時數	P74
	404-2 員工技能提升方案和過渡援助方案	P72-73
GRI 405：多元化與平等機會 2016	-3 實質性議題的管理	P29, P68
	405-1 管治機構與員工的多元化	P29, P68
GRI 406：反歧視 2016	3-3 實質性議題的管理	P29, P40, P68
	406-1 歧視事件及採取的糾正行動	P68
GRI 408：童工 2016	3-3 實質性議題的管理	P40, P66
	408-1 具有重大童工事件風險的運營點和供應商	無
GRI 409：強迫或強制勞動2016	3-3 實質性議題的管理	P40, P66
	409-1 具有強迫或強制勞動事件重大風險的運營點和供應商	無
GRI 413：當地社區 2016	3-3 實質性議題的管理	P101-102
	413-1 有當地社區參與、影響評估和發展計劃的運營點	P101-102
	413-2 對當地社區有實際或潛在重大負面影響的運營點	無
GRI 414：供應商社會評估2016	3-3 實質性議題的管理	P38-40
	414-1 使用社會評價維度篩選的新供應商	P40
	414-2 供應鏈的負面社會影響以及採取的行動	無
GRI 416：客戶健康與安全2016	3-3 實質性議題的管理	P47-55
	416-1 評估產品和服務類別的健康與安全影響	P54
	416-2 涉及產品和服務的健康與安全影響的違規事件	無
GRI 417：營銷與標識2016	3-3 實質性議題的管理	P63-64
	417-1 對產品和服務信息與標識的要求	P64
	417-2 涉及產品和服務信息與標識的違規事件	無
	417-3 涉及營銷傳播的違規事件	無
GRI 418：客戶隱私 2016	3-3 實質性議題的管理	P45
	418-1 涉及侵犯客戶隱私和丟失客戶資料的經證實的投訴	無
