# Supplementary material
Source: ML conference proceedings conference paper supplement (https://openreview.net/forum?id=xg0fmtqh8d)
Supplement: supplementary_material [file 495_郑州银行:截至2023年12月31日止年度业绩公告.xlsx]

## Sheet: Sheet
	附註四	2023年12月31日	2022年12月31日
資產
現金及存放中央銀行款項	12	26,369,865	26,487,450
存放同業及其他金融機構款項	13	1,244,162	1,922,266
拆出資金	14	6,227,699	2,410,452
買入返售金融資產	15	10,689,146	12,386,501
發放貸款及墊款	16	350,325,297	322,207,034
金融投資:
以公允價值計量且其變動計入當期損益的金融投資	17	40,723,996	44,441,710
以公允價值計量且其變動計入其他綜合收益的金融投資	17	22,872,676	17,150,060
以攤餘成本計量的金融投資	17	122,756,433	121,679,176
應收租賃款	18	32,817,168	30,633,447
對聯營公司投資	19	604,401	273,881
物業及設備	20	3,424,145	3,049,807
遞延所得稅資產	21	6,278,278	4,880,568
其他資產	22	6,376,163	3,991,266
資產總計		630,709,429	591,513,618
負債和股東權益
負債
向中央銀行借款	23	30,960,269	20,105,825
同業及其他金融機構存放款項	24	14,307,609	29,541,040
拆入資金	25	33,246,902	29,548,795
賣出回購金融資產款	27	25,131,941	19,098,195
衍生金融負債	26	–	100,456
吸收存款	28	366,521,910	341,797,766
應交稅費		1,092,496	557,405
已發行債券	29	102,068,783	94,992,906
其他負債	30	3,064,663	3,145,994
負債合計		576,394,573	538,888,382
股東權益
股本	31	9,092,091	8,265,538
其他權益工具	34	9,998,855	9,998,855
資本公積	32	5,985,102	6,811,655
盈餘公積	32	3,689,605	3,505,562
一般準備	32	8,266,509	7,767,704
投資重估儲備	32	189,386	(126,163)
設定受益計劃重估儲備	32	(74,043)	(68,635)
未分配利潤	33	15,305,319	14,618,050
歸屬於本行股東權益合計		52,452,824	50,772,566
非控制性權益		1,862,032	1,852,670
股東權益合計		54,314,856	52,625,236
負債和股東權益總計		630,709,429	591,513,618
