# Supplementary material
Source: ML conference proceedings conference paper supplement (https://openreview.net/forum?id=xg0fmtqh8d)
Supplement: supplementary_material [file 496_华夏航空:2024年员工持股计划.xlsx]

## Sheet: Sheet
释义项		释义内容
华夏航空/公司/本公司/上市公司	指	华夏航空股份有限公司
本员工持股计划	指	《华夏航空股份有限公司2024年员工持股计划》
本员工持股计划草案	指	《华夏航空股份有限公司2024年员工持股计划（草案）》
《员工持股计划管理办法》	指	《华夏航空股份有限公司2024年员工持股计划管理办法》
持有人	指	参与本员工持股计划的人员，即公司（含子公司）董事、监事、高级管理人员及核心骨干员工
持有人会议	指	本员工持股计划持有人会议
管理委员会	指	本员工持股计划管理委员会
公司股票	指	华夏航空股份有限公司A股普通股股票
锁定期	指	指本员工持股计划设定的持有人归属权益的条件尚未成就，非经管理委员会同意所获授份额不得转让或处置的期间，自公司公告最后一笔标的股票过户至本员工持股计划名下之日起计算
标的股票	指	本员工持股计划通过合法方式购买和持有的华夏航空A股普通股股票
中国证监会	指	中国证券监督管理委员会
证券交易所	指	深圳证券交易所
《公司法》	指	《中华人民共和国公司法》
《证券法》	指	《中华人民共和国证券法》
《指导意见》	指	《关于上市公司实施员工持股计划试点的指导意见》
《自律监管指引》	指	《深圳证券交易所上市公司自律监管指引第1号——主板上市公司规范运作》
《上市规则》	指	《深圳证券交易所股票上市规则》
《公司章程》	指	《华夏航空股份有限公司章程》
元、万元、亿元	指	人民币元、人民币万元、人民币亿元
