# Supplementary material
Source: ML conference proceedings conference paper supplement (https://openreview.net/forum?id=xg0fmtqh8d)
Supplement: supplementary_material [file 498_维信诺:维信诺科技股份有限公司审阅报告.xlsx]

## Sheet: Sheet
资产	附注	2024-6-30	2023-12-31
流动资产：
货币资金	五、1	10,719,881,619.31	8,013.081,597.82
交易性金融资产	五、2	690,414,217.44	1,520,707,428.32
衍生金融资产
应收票据	五、3	15,379,914.08	13,387,959.11
应收账款	五、4	2,853,708,909.6	2,442,019,875.43
应收款项融资	五、5	86,164,658.31	72,355,895.89
预付款项	五、6	89,863,428.07	164,864,067.64
其他应收款	五、7	1,015,871,473.80	1,194,725,117.77
存货	五、8	1,190,904,314.15	988,555,102.96
合同资产
持有待售资产
一年内到期的非流动资产
其他流动资产	五、9	972,668,211.67	1,002,561,135.16
流动资产合计		17,634,856,746.43	15,412,258,180.10
非流动资产:
债权投资
其他债权投资
长期应收款
长期股权投资	五、10	1,215.062,420.33	1,130,389,648.8
其他权益工具投资	五、11		1,020,197.35
其他非流动金融资产
投资性房地产
固定资产	五、12	21,305,650,741.32	22,392,956,693.90
在建工程	五、13	26,952,473,583.74	25,993,403,095.17
生产性生物资产
油气资产
使用权资产	五、14	238,891,722.41	233,785,540.31
无形资产	五、15	3,162,153,575.28	2,973,500,547.63
开发支出	五、16	195,824,092.99	71,424,342.68
商誉	五、17	761,949,299.9	761,949,299.9
长期待摊费用	五、18	1,031,316,641.87	1,035,252,704.28
递址所得税资产	五，19	2,608,960,650.85	2,432,347,471.62
其他非流动资产	五、20	134,252,245.26	148,505,660.66
非流动资产合计		57,606,534,973.95	57,174,535,202.30
资产总计		75,241,391,720.38	72,586,793,382.40
负债和所有者权益(或股东权益)	附注	2024-6-30	2024-12-31
流动负债：
短期借款	五、22	8,157,656,157.32	8,474,127,756.7
交易性金融负
衍生金融负债
应付票据	五、23	2,993,879,429.95	2,003,411,512.01
应付账款	五、24	8,172,948,192.76	8,382,587,289.76
预收款项	五、25	51,116.93	156,284.29
合同负债	五、26	102,901,111.11	231,328,450.66
应付职工薪酬	五、27	262,746,781.77	413,831,123.3
应交税费	五、28	25,539,014.68	52,754,782.79
其他应付款	五、29	1,840,431,655.33	1,942,453,831.89
持有待售负债
一年内到期的非流动负债	五、30	8,567,146,080.71	6,824,858,731.81
其他流动负债	五、31	25,564,200.38	21,436,469.3
流动负债合计		30,148,863,740.94	28,346,946,232.51
非流动负债：
长期借款	五、32	20,989,887,087.89	20,038,271,852.16
应付债券
其中：优先股
永续债
租赁负债	五、33	215,933,240.75	210,328,631.26
长期应付款	五、34	3,311,838,977.65	1,818,810,116.91
长期应付职工薪酬
预计负债
递延收益	五、35	198,093,982.01	197,152,717.70
递延所得税负债	五、19	290,362,505.29	305,128,789.59
其他非流动负债
非流动负债合计		25,006,115,793.59	22,569,692,107.62
负债合计		55,154,979,534.53	50,916,638,340.13
所有者权益：
归属于母公司所有者权益合计	五、36	11,524,263,401.64	12,878,079,975.58
少数股东权益	五、36	8,562,148,784.21	8,792,075,066.69
所有者权益合计		20,086,412,185.85	21,670,155,042.27
负债和所有者权益总计		75,241,391,720.38	72,586,793,382.40
