# Supplementary material
Source: ML conference proceedings conference paper supplement (https://openreview.net/forum?id=xg0fmtqh8d)
Supplement: supplementary_material [file 499_德明利:深圳市德明利技术股份有限公司向特定对象发行股票并在主板上市募集说明书(修订稿).xlsx]

## Sheet: Sheet
序号	承租方	出租方	租赁房屋	面积（m2）	用途	租赁期限	权属证书
1	发行人	深圳市福田区政府物业管理中心	深圳市福田区中康路136号深圳新一代产业园1栋24-25层	3,957.66	办公	2020.09.01-2025.08.31	-
2			深圳市福田区中康路136号深圳新一代产业园1栋23层	1,978.83	办公	2021.05.10-2026.05.09	-
3	发行人	成都华诚信息产业有限公司	成都市高新区天府大道北段1480号8栋2单元16层01号	1,420.78	办公	2022.06.01-2025.06.30	成房权证监证字第3263718号
4	发行人	深圳智慧空间管理有限公司	深圳市福田区八卦岭八卦四路中厨6号综合厂房第1-7层	18,318.32	办公与厂房	2022.09.01-2031.04.30	深房地字第3000721417号；深房地字第3000721418号；深房地字第3000670088号；深房地字第3000670235号；深房地字第3000748182号；深房地字第3000700725号；深房地字第3000663604号；深房地字第3000748180号
5	富洲承	深圳市白鹿园科技有限公司	深圳市南山区粤海街道高新区社区科技南八路2号豪威科技大厦1503号单元	323.00	研发与办公	2022.12.15-2025.02.10	深房地字第4000620035
6	发行人	北京蓝创汇科技服务有限公司	北京市海淀区西北旺东路10号院东区10号楼5层5-02、5-03、5-04室	566.79	办公	2024.03.01-2027.05.31	京（2018）海淀区不动产权第0028271号
7	发行人	成都高投西芯置业有限公司	成都市高新区合顺路2号8栋1层9号房及6层3号房	1038.46	研发、办公	2024.05.20-2027.05.19	川（2024）成都市不动产权第0196539
8	发行人	浙江创新数智科技有限公司	杭州市滨江区浦沿街道滨文路868号闻涛新生大厦1幢10层1001及1002	480.72	办公	2024.07.01-2027.06.30	浙（2023）杭州市不动产权第0592080号
