# Supplementary material
Source: ML conference proceedings conference paper supplement (https://openreview.net/forum?id=xg0fmtqh8d)
Supplement: supplementary_material [file 500_百普赛斯:301080百普赛斯投资者关系管理信息20240325.xlsx]

## Sheet: Sheet
投资者关系活动类别	√特定对象调研 □分析师会议 □媒体采访 □业绩说明会 □新闻发布会 □路演活动 □现场参观 √其他（电话会议）
参与单位名称及人员姓名	华夏久盈、中信证券、中加基金、东吴证券、融通基金、交银基金、西南证券、东兴基金等41家机构42名参与人员
时间	2024年3月15日--3月22日
地点	北京 公司会议室
上市公司接待人员	副总经理、董事会秘书、财务负责人林涛证券事务代表李鹏君
投资者关系活动主要内容介绍	问：公司在CGT领域的布局？ 近年来随着国内外越来越多的细胞、基因治疗产品的获批，细胞和基因疗法（CGT）领域迎来了蓬勃的发展机遇。与此同时，来自于研发技术、产品质量、生产工艺、商业化、供应链稳定等方面的挑战也随之而来。公司基于内部丰富的蛋白管线，丰富的蛋白制备及分析方法开发技术经验以及大量的实验数据，可以为细胞与基因治疗客户提供整体解决方案，覆盖早期的药物靶点发现及验证阶段到临床试验、商业化生产的每一个阶段。 公司开发的一系列CD19、BCMA、GPC3等重组蛋白和抗独特型抗体产品，可被广泛用于CAR-T产品开发的过程和测试，评估筛选相关产品质量和活性。针对目前CAR-T细胞治疗领域中应用最广泛的靶点CD19，公司推出特异性靶向FMC63scFv抗原识别表位的抗独特型抗体，此抗体灵敏度高、特异性好，进一步丰富了FMC63CAR的检测手段。报告期内公司持续深入拓展细胞治疗相关的产品和技术…
附件清单	无
日期	2024 年 3 月 25 日
