# Supplementary material
Source: ML conference proceedings conference paper supplement (https://openreview.net/forum?id=xg0fmtqh8d)
Supplement: supplementary_material [file 501_维信诺:维信诺科技股份有限公司审阅报告.xlsx]

## Sheet: Sheet
财务报表项目	2023/12/31余额	本期新增补助金额	本期计入其他收益金额	本期冲减成本费用	本期其他变动	2024/6/30余额	与资产/收益相关
江苏省核心技术攻关项目	3,390,779.62	-	254,655.00	-	-	3,136,124.62	与资产相关
昆山第5.5代有源矩阵有机发光显示器（AMOLED）关键技术研发及产业化	7,991,842.69	-	403,653.48	-	-	7,588,189.21	与资产相关
昆山市重点技改项目-2017年昆山市转型升级创新发展（工业经济）专项	4,057,972.00	-	497,004.00	-	-	3,560,968.00	与资产相关
固安高精度掩膜板技术研发项目政府补助	7,242,064.20	-	517,193.58	-	-	6,724,870.62	与资产相关
进口设备贴息补助	87,645,078.41	-	-	7,016,806.62	-	80,628,271.79	与资产相关
其他	86,824,980.78	20,190,000.00	10,559,423.01	-	-	96,455,557.77	与资产/收益相关
合计	197,152,717.70	20,190,000.00	12,231,929.07	7,016,806.62	-	198,093,982.01
