# Supplementary material
Source: ML conference proceedings conference paper supplement (https://openreview.net/forum?id=xg0fmtqh8d)
Supplement: supplementary_material [file 502_维信诺:维信诺科技股份有限公司审阅报告.xlsx]

## Sheet: Sheet
项目	期末余额	期初余额
库存现金	12,503.45	12,478.83
银行存款	6,496,239,818.21	4,882,540,682.98
其他货币资金	4,196,879,883.15	3,113,041,488.44
未到期应收利息	26,749,414.50	17,486,947.57
合计	10,719,881,619.31	8,013,081,597.82
本公司受限制的货币资金明细如下:
项目	期末余额	期初余额
信用证保证金	252,735,636.34	527,929,313.52
承兑汇票保证金	2,772,561,921.16	1,852,519,699.49
保函保证金	603,289.49	203,082.97
保证金存款	1,170,979,036.16	732,389,392.46
合计	4,196,879,883.15	3,113,041,488.44
