# Supplementary material
Source: ML conference proceedings conference paper supplement (https://openreview.net/forum?id=xg0fmtqh8d)
Supplement: supplementary_material [file 504_郑州银行:截至2023年12月31日止年度业绩公告.xlsx]

## Sheet: Sheet
	附註四	2023年	2022年
經營活動現金流量
稅前利潤		1,739,636	2,807,230
調整項目：
信用減值損失		8,075,323	8,659,958
折舊及攤銷		458,441	468,042
未實現匯兌收益		(56,155)	(672,553)
處置長期資產的淨損益		(10,304)	3,897
以公允價值計量且其變動計入當期損益的金融投資的淨交易損益		(33,513)	139,144
投資淨收益		(493,881)	(575,053)
應佔聯營公司損失		17,350	102,014
籌資活動利息支出		2,599,417	2,372,248
金融投資的利息收入		(5,424,985)	(6,047,455)
		6,871,329	7,257,472
經營資產的變動
存放中央銀行限定性存款淨減少 ╱（增加）		700,596	(25,892)
存放和拆放同業及其他金融機構款項淨增加		(2,200,000)	(1,049,091)
以公允價值計量且其變動計入當期損益的金融投資的淨減少 ╱（增加）		4,235,749	(6,798,131)
發放貸款及墊款淨增加		(36,248,929)	(43,692,638)
買入返售金融資產淨減少		1,698,520	1,840,610
應收租賃款淨增加		(3,199,921)	(2,898,853)
其他經營資產淨減少		533,229	63,740
		(34,480,756)	(52,560,255)
經營負債的變動
向中央銀行借款淨增加 ╱（減少）		10,762,907	(2,676,675)
同業及其他金融機構存入及拆入款項淨減少		(11,569,325)	(7,189,727)
賣出回購金融資產款淨增加		6,030,831	6,728,995
吸收存款淨增加		23,253,277	16,951,631
支付所得稅		(818,268)	(945,612)
其他經營負債淨增加		1,598,107	1,084,154
		29,257,529	13,952,766
經營活動產生的現金流量淨額		1,648,102	(31,350,017)
投資活動現金流量
收回投資所得款項		88,267,518	118,049,760
處置物業及設備和其他資產所得款項		11,920	3,928
投資支付的現金		(96,986,311)	(97,099,411)
取得投資收益收到的現金		5,545,615	7,013,859
購入物業及設備及其他資產所付款項		(522,536)	(741,490)
對外增資支付的現金		(347,870)	–
收到其他與投資活動有關的現金		–	284,432
投資活動產生的現金流量淨額		(4,031,664)	27,511,078
籌資活動現金流量
發行債券所得款項淨額		139,390,217	131,040,039
償還已發行債券支付的現金		(132,422,300)	(126,044,973)
償付已發行債券利息支付的現金		(2,481,660)	(2,451,125)
分配股息支付的現金		(480,049)	(1,002,834)
償還優先股支付的現金		–	(8,466,343)
其他籌資活動現金流		(120,121)	(146,394)
籌資活動產生的現金流量淨額		3,886,087	(7,071,630)
現金及現金等價物淨增加╱(減少)額		1,502,525	(10,910,569)
年初現金及現金等價物		10,515,331	21,412,333
匯率變動對現金及現金等價物的影響		2,117	13,567
年末現金及現金等價物	35(a)	12,019,973	10,515,331
經營活動產生的現金流量淨額包括:
收取的利息		20,574,761	19,910,800
支付的利息		(8,912,809)	(9,348,349)
