# Supplementary material
Source: ML conference proceedings conference paper supplement (https://openreview.net/forum?id=xg0fmtqh8d)
Supplement: supplementary_material [file 505_西子洁能:关于2024年第三季度订单数据的自愿性信息披露公告.xlsx]

## Sheet: Sheet
按产品分类	2024年第三季度新增订单	本年累计新增订单	截至2024年9月30日在手订单
余热锅炉	30,080	149,673	188,444
清洁环保能源装备	17,369	69,869	147,311
解决方案	65,704	195,403	276,202
备件及服务	12,780	43,718	29,402
合计	125,933	458,663	641,359
