# Supplementary material
Source: ML conference proceedings conference paper supplement (https://openreview.net/forum?id=xg0fmtqh8d)
Supplement: supplementary_material [file 506_维信诺:维信诺科技股份有限公司审阅报告.xlsx]

## Sheet: Sheet
授予对象类别	本期授予		本期行权		本期解锁		本期失效
	数量	金额	数量	金额	数量	金额	数量	金额
管理人员	-	-	100,840	74,213.39	795,000	1,545,628.84	185,168	555,672.06
销售人员	-	-	15,658	14,073.88	50,000	43,597.35	33,132	129,214.80
研发人员	-	-	-	-	225,000	250,139.42	253,011	337,643.89
生产人员	-	-	81,983	73,688.80	150,000	130,792.06	56,763	103,697.74
合计	-	-	198,481	161,976.07	1,220,000	1,970,157.67	528,074	1,126,228.49
