# Supplementary material
Source: ML conference proceedings conference paper supplement (https://openreview.net/forum?id=xg0fmtqh8d)
Supplement: supplementary_material [file 507_维信诺:维信诺科技股份有限公司审阅报告.xlsx]

## Sheet: Sheet
类型	会计科目	本期发生额	上期发生额	与资产相关/与收益相关
昆山第5.5代有源矩阵有机发光显示器（AMOLED）关键技术研发及产业化	其他收益	403,653.48	807,306.96	与资产相关
昆山市重点技改项目-2017年昆山市转型升级创新发展（工业经济）专项	其他收益	497,004.00	994,008.00	与资产相关
新站区投资促进局财政奖补资金	其他收益	-	950,000,000.00	与收益相关
进口设备贴息补助	财务费用	7,016,806.62	13,969,913.24	与资产相关
融资利息贴息	财务费用	-	100,000.00	与收益相关
其他	其他收益	28,212,579.95	136,712,072.01	与资产相关/与收益相关
合计		36,130,044.05	1,102,583,300.21
