# Supplementary material
Source: ML conference proceedings conference paper supplement (https://openreview.net/forum?id=xg0fmtqh8d)
Supplement: supplementary_material [file 508_维信诺:维信诺科技股份有限公司审阅报告.xlsx]

## Sheet: Sheet
投资者名称	变更前（实缴出资）		本次增加	本次减少	变更后（实缴出资）
	投资金额	所占比例（%）			投资金额	所占比例（%）
维信诺	26.50	18.19	59.60		86.10	59.09
芯屏基金	60.00	41.17	-	15.00	45.00	30.89
兴融公司	29.60	20.32	-	29.60	-	-
合屏公司	29.60	20.32	-	15.00	14.60	10.02
合计	145.70	100.00	59.60	59.60	145.70	100.00
