# Supplementary material
Source: ML conference proceedings conference paper supplement (https://openreview.net/forum?id=xg0fmtqh8d)
Supplement: supplementary_material [file 509_维信诺:维信诺科技股份有限公司审阅报告.xlsx]

## Sheet: Sheet
项目	本期	上期
授予日权益工具公允价值的确定方法	限制性股票按授予日收盘价；股票期权按 Black-Scholes 定价模型 确定
授予日权益工具公允价值的重要参数	授予日股票的收盘价、股价波动率
可行权权益工具数量的确定依据	限制性股票根据最新取得的可解除限售人数变动、业绩指标完成情况等后续信息，修正预计可解除限售的限制性股票数量；股票期权根据最新取得的可行权人数变动、业绩指标完成情况等后续信息，修正预计可行权的股票期权数量
本期估计与上期估计有重大差异的原因	无
以权益结算的股份支付计入资本公积的累计金额	61,776,661.12	60,388,659.38
本期以权益结算的股份支付确认的费用总额	3,583,963.41	17,038,032.94
