# Supplementary material
Source: ML conference proceedings conference paper supplement (https://openreview.net/forum?id=xg0fmtqh8d)
Supplement: supplementary_material [file 510_上海电气:二零二四年中期业绩.xlsx]

## Sheet: Sheet
	能源裝備	工業裝備	集成服務	其他	未分配的金額	分部間抵銷	合計
營業收入
其中：對外交易收入	24,181,348	18,352,424	7,315,537	18,375	833	-	49,868,517
分部間交易收入	472,358	606,562	645,566	26,124	-	(1,750,610)	-
	24,653,706	18,958,986	7,961,103	44,499	833	(1,750,610)	49,868,517
營業成本	19,688,906	15,664,546	6,636,698	29,620	164	(1,743,479)	40,276,455
信用減值損失	318,340	166,036	(117,280)	(211)	25,930	1,273	394,088
資產減值損失	280,397	21,701	8,403	-	82,000	14,557	407,058
折舊費和攤銷費	591,639	419,892	382,573	10,994	112,022	-	1,517,120
財務費用和匯兌收益	-	-	-	-	197,730	-	197,730
對聯營和合營企業的投資收益	-	-	-	-	531,994	-	531,994
營業利潤/(虧損)	1,137,257	706,351	693,000	(99,836)	(31,274)	(47,741)	2,357,757
營業外收支							45,414
利潤總額							2,403,171
資產和負債
資產總額	142,182,238	63,055,247	103,538,680	1,129,975	14,321,024	(41,931,998)	282,295,166
負債總額	99,773,984	43,736,895	98,476,350	386,239	10,185,170	(47,889,213)	204,669,425
折舊費用和攤銷費用以外的其他非現金費用	192,124	156,469	74,933	-	-	-	423,526
非流動資產增加額	622,964	361,914	996,130	17,555	2,199	-	2,000,762
