# Supplementary material
Source: ML conference proceedings conference paper supplement (https://openreview.net/forum?id=xg0fmtqh8d)
Supplement: supplementary_material [file 511_中集集团:2024年半年度业绩公告(2024年半年度报告摘要).xlsx]

## Sheet: Sheet
合併利潤表項目	2024年1–6月(未經審計)	2023年1–6月(未經審計)	增減
營業收入	79,115,043	60,573,968	30.61%
營業利潤	2,115,476	1,645,039	28.60%
稅前利潤	2,215,856	1,651,971	34.13%
所得稅費用	820,926	661,589	24.08%
淨利潤	1,394,930	990,382	40.85%
歸屬於母公司股東及其他權益持有者的淨利潤	865,781	398,556	117.23%
少數股東損益	529,149	591,826	(10.59%)
歸屬於母公司股東及其他權益持有者的扣除非經常性損益的淨利潤	820,320	976,599	(16.00%)
