# Supplementary material
Source: ML conference proceedings conference paper supplement (https://openreview.net/forum?id=xg0fmtqh8d)
Supplement: supplementary_material [file 512_史丹利:关于控股股东、实际控制人及其一致行动人之间内部协议转让股份暨控股股东、实际控制人成员调整的提示性公告.xlsx]

## Sheet: Sheet
股东性质	股东姓名	股份转让前		本次转让/受让数量	股份转让后
		持股数量	持股比例		持股数量	持股比例
控股股东、实际控制人	高文班	267,518,800	23.22%	-267,518,800	0	0.00%
控股股东、实际控制人	高进华	174,435,840	15.14%	214,615,040	389,050,880	33.77%
控股股东、实际控制人	高英	52,903,760	4.59%	/	52,903,760	4.59%
控股股东、实际控制人	高文靠	48,903,760	4.25%	/	48,903,760	4.25%
控股股东、实际控制人	高文安	41,343,560	3.59%	/	41,343,560	3.59%
控股股东、实际控制人	古龙粉	6,063,720	0.53%	-6,063,720	0	0.00%
控股股东、实际控制人	高文都	87,880	0.01%	/	87,880	0.01%
一致行动人	法亚楠	13,215,131	1.15%	58,967,480	72,182,611	6.27%
合计		604,472,451	52.48%	0	604,472,451	52.48%
