# Supplementary material
Source: ML conference proceedings conference paper supplement (https://openreview.net/forum?id=xg0fmtqh8d)
Supplement: supplementary_material [file 513_维信诺:维信诺科技股份有限公司审阅报告.xlsx]

## Sheet: Sheet
子公司名称	主要经营地	注册地	业务性质	持股比例（%）		取得方式
				直接	间接
固安云谷	河北	河北	电子产品生产经营	53.73	23.57	设立
霸州云谷	河北	河北	电子产品生产经营	100.00	-	设立
江苏维信诺	江苏	江苏	主要从事新型平板显示产品及设备的研发、生产、销售及技术咨询等	100.00	-	设立
国显光电	江苏	江苏	新型平板显示产品及设备的研发、生产、销售	-	100.00	非同一控制下企业合并
江苏汇显	江苏	江苏	技术服务、技术开发、技术咨询、技术交流、技术转让、技术推广；科技推广和应用服务；显示器件销售；新材料技术研发；新材料技术推广服务；电子专用设备销售；电子专用材料销售；知识产权服务（专利代理服务除外）；货物进出口；技术进出口	-	100.00	设立
昆山显示	江苏	江苏	新型平板显示器件的研发、生产、销售	-	100.00	非同一控制下企业合并
香港贸易	香港	香港	货物或技术进出口；国际贸易	-	100.00	设立
昆山光电	江苏	江苏	新型平板显示器面板、模组、整机系统及相关产品的研发、生产、销售	-	100.00	非同一控制下企业合并
昆山显示中心	江苏	江苏	新型平板显示技术的研发、科技成果的转化和销售、科研副产品的销售、项目投资和咨询等	-	100.00	非同一控制下企业合并
北京科技	北京	北京	有机发光平板显示器的研发、生产、销售	-	100.00	非同一控制下企业合并
固安显示	河北	河北	研发、生产、销售:电子产品、电子元器件等	100.00	-	设立
汕头销售	广东	广东	销售:电子产品、电子元器及配套元器件等	100.00	-	设立
合肥贸易	安徽	安徽	货物或技术进出口；电子科技、计算机网络科技领域内的技术开发、技术咨询、技术转让、技术服务；计算机、软件及辅助设备、化工产品销售；仓储服务	100.00	-	设立
合肥维信诺	安徽	安徽	电子产品、电子元器件、配套元器件、机械设备及零配件,计算机软件、硬件及辅助设备研发、生产、销售;基础软件服务;应用软件服务;企业管理咨询及服务;技术开发、技术转让、技术推广、技术咨询;自营和代理各类商品及技术的进出口业务	59.09	-	非同一控制下企业合并
维信诺悦享	安徽	安徽	商务代理代办服务；企业管理咨询；日用百货销售；日用品销售；电子元器件零售；电子产品销售等	100.00	-	设立
维信诺美国	美国	美国	技术咨询、包含设计、面板工艺、模组设计、新型工艺咨询	-	100.00	设立
合肥国显	安徽	安徽	电子产品销售；电子元器件制造；电子元器件批发；电子元器件零售等	100.00	-	设立
