# Supplementary material
Source: ML conference proceedings conference paper supplement (https://openreview.net/forum?id=xg0fmtqh8d)
Supplement: supplementary_material [file 514_上海电气:二零二四年中期业绩.xlsx]

## Sheet: Sheet
	附註	未經審核二零二四年六月三十日人民幣千元	經審核二零二三年十二月三十一日人民幣千元
流動資產
貨幣資金		34,102,248	30,164,902
結算備付金		2,899	5,804
拆出資金		18,367,251	18,054,967
交易性金融資產		7,596,756	7,492,363
衍生金融資產		351	12,798
應收票據		2,855,776	3,995,445
應收賬款	3	37,232,760	40,477,926
應收款項融資		832,075	1,354,944
預付款項		10,010,437	9,511,724
其他應收款		5,689,325	5,984,167
買入返售金融資產		1,535,071	1,135,620
存貨		34,083,103	32,423,705
合同資產		22,237,270	21,913,397
一年內到期的非流動資產		1,741,939	1,976,785
其他流動資產		13,183,378	17,322,171
流動資產合計		189,470,639	191,826,718
非流動資產
發放貸款及墊款		9,310,573	7,370,067
債權投資		152,436	152,570
其他債權投資		59,150	-
長期應收款		3,072,176	3,067,193
長期股權投資		11,064,251	11,001,371
其他非流動金融資產		7,088,762	7,339,112
投資性房地產		561,185	608,798
固定資產		19,943,829	20,427,312
在建工程		2,616,206	1,934,072
使用權資產		1,553,105	1,410,284
無形資產		12,177,145	12,256,813
開發支出		18,526	31,661
商譽		3,203,397	3,244,929
長期待攤費用		450,569	504,145
遞延所得稅資產		8,418,321	8,300,768
其他非流動資產		13,134,896	13,790,754
非流動資產合計		92,824,527	91,439,849
資產總計		282,295,166	283,266,567
流動負債
短期借款		9,392,394	8,272,416
交易性金融負債		25,760	34,435
衍生金融負債		12,778	3,425
應付票據		11,050,272	12,074,199
應付賬款	4	57,471,931	59,610,479
預收款項		798,112	859,959
合同負債		47,987,955	44,207,113
賣出回購金融資產款		-	1,000,000
吸收存款及同業存放		6,100,890	7,270,530
應付職工薪酬		4,291,983	5,381,579
應交稅費		1,763,335	2,466,028
其他應付款		8,337,988	8,144,533
一年內到期的非流動負債		6,796,437	6,898,720
其他流動負債		12,953,299	11,501,165
流動負債合計		166,983,134	167,724,581
非流動負債
長期借款		31,211,007	30,893,868
應付債券	5	-	749,300
租賃負債		1,337,835	1,150,996
長期應付款		531,756	561,953
遞延收益		1,249,689	1,333,337
長期應付職工薪酬		185,258	187,568
預計負債		2,488,836	3,028,758
遞延所得稅負債		669,537	614,502
其他非流動負債		12,373	95,064
非流動負債合計		37,686,291	38,615,346
負債合計		204,669,425	206,339,927
股東權益
股本		15,579,809	15,579,809
資本公積		19,476,900	19,476,900
其他綜合收益		14,673	21,601
專項儲備		142,011	134,056
盈餘公積		5,906,524	5,906,524
未分配利潤	6	12,280,605	11,678,998
歸屬於母公司股東權益合計		53,400,522	52,797,888
少數股東權益		24,225,219	24,128,752
股東權益合計		77,625,741	76,926,640
負債及股東權益總計		282,295,166	283,266,567
