# Supplementary material
Source: ML conference proceedings conference paper supplement (https://openreview.net/forum?id=xg0fmtqh8d)
Supplement: supplementary_material [file 515_药明康德:2023年环境、社会及管治报告.xlsx]

## Sheet: Sheet
類型	姓名	性別	任期	獨立於		專業能力
				公司管理5	其他利益6	行業經驗7	風險管理	會計	法律
董事長、執行董事、總裁（首席執行官）	李革	男	6年	否	否	✓
執行董事、聯席首席執行官	陳民章	男	2年	否	是	✓
執行董事、副董事長、全球首席投資官、高端治療事業部首席執行官	胡正國	男	6年	否	是	✓		✓
執行董事、聯席首席執行官	楊青	男	3年	否	是	✓
執行董事、中國區首席運營官、執行副總裁	張朝暉	男	6年	否	否	✓
非執行董事	童小幪	男	6年	否	是			✓
非執行董事	吳亦兵	男	6年	否	是		✓
獨立非執行董事	盧韶華	女	1年	是	是	✓	✓	✓
獨立非執行董事	俞衛	男	1年	是	是	✓	✓
獨立非執行董事	張新	男	1年	是	是			✓
獨立非執行董事	詹智玲	女	1年	是	是				✓
獨立非執行董事	馮岱	男	5年	是	是	✓
