# Supplementary material
Source: ML conference proceedings conference paper supplement (https://openreview.net/forum?id=xg0fmtqh8d)
Supplement: supplementary_material [file 516_赣锋锂业:2021年股票期权激励计划第三个行权期行权条件成就.xlsx]

## Sheet: Sheet
行權安排	行權時間	行權比例
第一個行權期	自授予日起12個月後的首個交易日起至授予日起24個月內的最後一個交易日當日止	25%
第二個行權期	自授予日起24個月後的首個交易日起至授予日起36個月內的最後一個交易日當日止	25%
第三個行權期	自授予日起36個月後的首個交易日起至授予日起48個月內的最後一個交易日當日止	25%
第四個行權期	自授予日起48個月後的首個交易日起至授予日起60個月內的最後一個交易日當日止	25%
