# Supplementary material
Source: ML conference proceedings conference paper supplement (https://openreview.net/forum?id=xg0fmtqh8d)
Supplement: supplementary_material [file 518_中信股份:公告-中信证券股份有限公司2024年中期业绩公告.xlsx]

## Sheet: Sheet
		截至6月30日止六個月
	附註	2024年(未經審計)	2023年(未經審計)
收入
手續費及佣金收入		15,604,909	17,538,300
利息收入	5	10,324,499	10,734,329
投資收益	6	11,730,672	11,539,096
		37,660,080	39,811,725
大宗商品貿易收入		3,118,669	1,460,929
其他收入	7	2,006,352	1,480,576
總收入及其他收入合計		42,785,101	42,753,230
手續費及佣金支出	8	3,596,599	2,997,889
利息支出	8	9,208,508	8,610,920
職工費用	8	9,814,240	10,698,288
折舊費用		858,812	732,143
稅金及附加		138,248	202,063
大宗商品貿易成本		2,784,230	1,415,780
其他營業費用及成本	8	2,997,199	2,980,008
信用減值損失	9	(350,347)	380,105
其他資產減值損失	10	4,177	3,289
營業費用合計		29,051,666	28,020,485
營業利潤		13,733,435	14,732,745
分佔聯營公司損益		217,383	359,068
分佔合營公司損益		1,156	5,966
稅前利潤		13,951,974	15,097,779
所得稅費用	11	2,970,036	3,345,868
本期淨利潤		10,981,938	11,751,911
歸屬於:
母公司股東		10,569,765	11,305,771
非控制性權益		412,173	446,140
		10,981,938	11,751,911
每股收益(每股人民幣元)
—基本	13	0.69	0.75
—稀釋	13	0.69	0.75
