# Supplementary material
Source: ML conference proceedings conference paper supplement (https://openreview.net/forum?id=xg0fmtqh8d)
Supplement: supplementary_material [file 519_东莞农商银行:2023年度社会责任报告(环境、社会及管治报告).xlsx]

## Sheet: Sheet
指標	單位	2023年	2022年	2021年
電子銀行的客戶數	戶	6,690,091	5,906,721	5,004,864
交易總筆數	萬筆	67,136	58,205	57,257
電子銀行實現的交易總筆數	萬筆	65,975	56,867	55,641
網上銀行實現的交易總筆數	萬筆	1,297	1,257	1,276
手機銀行實現的交易總筆數	萬筆	2,316	2,192	2,207
網上銀行客戶數	人	711,666	693,470	667,758
手機銀行客戶數	人	4,599,891	4,089,700	3,425,912
微信銀行客戶數	人	1,378,534	1,123,551	911,194
電子銀行業務替代（分流）率	%	98.27	97.70	97.18
投入使用的智慧機具數量	臺	557	391	319
投入使用的ATM機數量	臺	787	851	1,072
投入使用的POS機數量	臺	10,966	15,164	14,634
