# Supplementary material
Source: ML conference proceedings conference paper supplement (https://openreview.net/forum?id=xg0fmtqh8d)
Supplement: supplementary_material [file 520_长飞光纤光缆:2023环境、社会及管治报告.xlsx]

## Sheet: Sheet
類別	指標	單位	2023
環境	溫室氣體7,8
	溫室氣體排放總量(範疇1和2)	噸(二氧化碳當量)	389,242.73
	直接溫室氣體排放量(範疇1)	噸(二氧化碳當量)	59,465.89
	間接溫室氣體排放量(範疇2)	噸(二氧化碳當量)	329,776.84
	溫室氣體排放密度	噸(二氧化碳當量)/萬元産值	0.19
	能源9
	能源消耗總量	兆瓦時	806,719.79
	能耗密度	兆瓦時/萬元産值	0.40
	直接能源消耗
	直接能源消耗總量	兆瓦時	222,413.95
	無鉛汽油	公升	174,986.08
	氫氣	立方米	674,944.71
	丙烷	立方米	116,027.01
	柴油	公升	1,611,557.81
	液化石油氣	千克	5,514.00
	天然氣	立方米	20,550,295.73
	間接能源消耗
	間接能源消耗總量	兆瓦時	584,305.84
	蒸汽	兆瓦時	41,344.71
	外購電力	兆瓦時	542,961.13
	水資源使用10
	用水量	立方米	1,881,905.63
	用水密度	立方米/萬元産值	0.91
	污水排放
	污水排放量	立方米	549,533.54
	廢弃物
	無害廢弃物種類
	生活垃圾	噸	748.00
	工業廢弃物	噸	2,103.68
	廢污泥	噸	672.38
	無害廢弃物處置總量	噸	3,524.06
	無害廢弃物處置量密度	噸/百萬元産值	0.17
	有害廢弃物種類
	廢有機溶液	噸	81.85
	廢酸	噸	241.05
	廢活性炭	噸	51.83
	沾染化學品的廢包裝材料	噸	140.93
	其他有害廢弃物	噸	30.35
	危險廢弃物處置總量	噸	546.01
	危險廢弃物處置量密度	噸/百萬元産值	0.03
	包裝材料
	紙質	噸	1,837.20
	塑料	噸	1,831.47
	金屬	噸	577.04
	包裝材料
	木材	噸	23,468.37
	其他	噸	11.99
	總量	噸	27,726.07
	密度	噸/萬元産值	0.01
社會	僱傭11
	員工總數	人	8,181
	按性別劃分
	女性	人	2,469
	男性	人	5,712
	按員工類別劃分
	高層管理人員	人	218
	中層管理人員	人	39
	其他辦公室職員	人	2,963
	普通工人、技術工人	人	4,961
	按年齡劃分
	30歲以下	人	2,033
	30-50歲	人	5,749
	50歲以上	人	399
	按地區劃分12
	中國大陸	人	7,207
	中國港澳臺	人	7
	海外	人	967
	員工流失率13
	員工總流失率	%	5.59
	按性別劃分
	女性	%	5.41
	男性	%	5.62
	按年齡劃分
	30歲以下	%	15.15
	30-50歲	%	3.85
	50歲以上	%	0.46
	健康與安全14
	因工亡故人數(2023)	人	0
	因工亡故人數(2022)	人	0
	因工亡故人數(2021)	人	0
	因工亡故比率(2023)	%	0
	因工亡故比率(2022)	%	0
	因工亡故比率(2021)	%	0
	工傷損失日數15	日	72
	員工培訓16
	平均受訓時長	小時	31.15
	按性別劃分
	女性	小時	30.34
	男性	小時	31.31
	按員工類別劃分
	高層管理人員	小時	9.23
	中層管理人員	小時	35.77
	其他辦公室職員	小時	25.99
	普通工人、技術工人	小時	37.00
	受訓員工比例17
	按性別劃分
	女性	%	100
	男性	%	100
	按員工類別劃分
	高層管理人員	%	100
	中層管理人員	%	100
	其他辦公室職員	%	100
	普通工人、技術工人	%	100
	主營産品及服務投訴	起	118
	供應商分布及數量情况18
	按地區劃分19
	中國	家	301
	日本	家	1
	亞太地區(中國、日本除外)	家	5
	歐洲	家	4
	北美洲	家	1
	總計	家	312
