# Supplementary material
Source: ML conference proceedings conference paper supplement (https://openreview.net/forum?id=xg0fmtqh8d)
Supplement: supplementary_material [file 521_德明利:深圳市德明利技术股份有限公司向特定对象发行股票并在主板上市募集说明书(修订稿).xlsx]

## Sheet: Sheet
年份	产品类型	产量	销量	产销率
2024年1-6月	存储卡模组（万个）	939.42	869.26	92.53%
	存储盘模组（万个）	345.12	344.48	99.81%
	固态硬盘模组（万个）	159.58	155.40	97.38%
	嵌入式存储模组（万个）	435.41	309.96	71.19%
	合计	1,879.53	1,679.1	89.34%
2023年	存储卡模组（万个）	3,786.42	3,553.55	93.85%
	存储盘模组（万个）	1,329.04	1,215.69	91.47%
	固态硬盘模组（万个）	575.45	566.95	98.52%
	嵌入式存储模组（万个）	530.69	287.01	54.08%
	合计	6,221.60	5,623.20	90.38%
2022年	存储卡模组（万个）	3,791.17	4,077.90	107.56%
	存储盘模组（万个）	1,185.76	983.13	82.91%
	固态硬盘模组（万个）	231.79	188.75	81.43%
	嵌入式存储模组（万个）	31.13	13.12	42.15%
	合计	5,239.85	5,262.90	100.44%
2021年	存储卡模组（万个）	2,452.40	2,091.91	85.30%
	存储盘模组（万个）	817.63	883.39	108.04%
	固态硬盘模组（万个）	221.65	202.48	91.35%
	嵌入式存储模组（万个）	-	-	-
	合计	3,491.68	3,177.78	91.01%
