# Supplementary material
Source: ML conference proceedings conference paper supplement (https://openreview.net/forum?id=xg0fmtqh8d)
Supplement: supplementary_material [file 522_招商银行:2024年中期业绩公告.xlsx]

## Sheet: Sheet
	以攤餘成本計量的貸款和墊款及其他資產損失╱減值準備	以公允價值計量且其變動計入其他綜合收益的金融資產	以公允價值計量且其變動計入當期損益的金融工具	應付工資及其他	合計
於2023年1月1日	75,278	(1,012)	237	14,835	89,338
於損益中確認	(1,045)	(730)	(592)	2,450	83
於其他綜合收益中確認	–	(493)	–	9	(484)
匯率變動影響	18	3	(8)	–	13
於2023年12月31日	74,251	(2,232)	(363)	17,294	88,950
