# Supplementary material
Source: ML conference proceedings conference paper supplement (https://openreview.net/forum?id=xg0fmtqh8d)
Supplement: supplementary_material [file 523_上海电气:於二零二四年九月十八日举行之股东特别大会投票表决结果.xlsx]

## Sheet: Sheet
普通決議案		得票數	得票數佔於股東特别大會上所投有效票數的比例（%）
1	考慮及批准委任董鑑華先生擔任本公司第五届董事會董事。	9,091,721,745	99.6946
由於超過半數票數贊成本項決議案，決議案獲正式通過為普通決議案。
2	考慮及批准委任杜朝輝博士擔任本公司第五屆董事會獨立非執行董事。	9,110,015,666	99.8952
由於超過半數票數贊成本項決議案，決議案獲正式通過為普通決議案。
3	考慮及批准委任監事：
3.01	考慮及批准委任許建國先生擔任本公司第五屆監事會監事；	9,113,980,437	99.9386
3.02	考慮及批准委任郭浩環女士擔任本公司第五屆監事會監事。	9,069,601,368	99.4520
由於超過半數票數贊成本項決議案，決議案獲正式通過為普通決議案。
