# Supplementary material
Source: ML conference proceedings conference paper supplement (https://openreview.net/forum?id=xg0fmtqh8d)
Supplement: supplementary_material [file 524_维信诺:维信诺科技股份有限公司审阅报告.xlsx]

## Sheet: Sheet
纳税主体名称	所得税税率	备注
本公司	25%	-
云谷（固安）科技有限公司（以下简称“固安云谷”）	15%	高新技术企业所得税优惠期为2023年-2025年
霸州市云谷电子科技有限公司（以下简称“霸州云谷”）	25%	-
江苏维信诺显示科技有限公司（以下简称“江苏维信诺”）	25%	-
江苏汇显显示技术有限公司（以下简称“江苏汇显”）	25%	-
昆山国显光电有限公司（以下简称“国显光电”）	15%	高新技术企业所得税优惠期为2021年-2023年
昆山维信诺显示技术有限公司（以下简称“昆山显示”）	25%	-
昆山维信诺光电有限公司（以下简称“昆山光电”）	25%	-
昆山工研院新型平板显示技术中心有限公司（以下简称“昆山显示中心”）	25%	-
北京维信诺科技有限公司（以下简称“北京科技”）	15%	高新技术企业所得税优惠期为2023年-2025年
维信诺（固安）显示科技有限公司（以下简称“固安显示”）	25%	-
汕头市维信诺销售服务有限公司（以下简称“汕头销售”）	25%	-
合肥维信诺贸易有限公司（以下简称“合肥贸易”）	25%	-
晟维（香港）贸易有限公司（以下简称“香港贸易”）	16.50%	-
VisionoxAmerica,Inc.，（以下简称“维信诺美国”）	29.84%	-
合肥维悦享商务有限公司（以下简称“合肥维悦享”）	20%	小型微利企业
合肥国显科技有限公司（以下简称“合肥国显”）	25%	-
标的公司	25%
