# Supplementary material
Source: ML conference proceedings conference paper supplement (https://openreview.net/forum?id=xg0fmtqh8d)
Supplement: supplementary_material [file 525_维信诺:维信诺科技股份有限公司审阅报告.xlsx]

## Sheet: Sheet
租赁公司	起始日	到期日	融资金额
苏州园恒融资租赁有限公司	2023-5-31	2025-5-31	51,526,290.00
苏州园恒融资租赁有限公司	2023-6-9	2025-6-9	41,221,030.00
浙江浙银金融租赁股份有限公司	2022-9-29	2024-9-15	13,196,574.10
苏州国发融资租赁有限公司	2022-10-17	2024-10-17	12,822,942.10
苏州国发融资租赁有限公司	2023-6-26	2025-6-26	25,428,134.81
永赢金融租赁有限公司	2023-6-13	2026-6-12	8,243,615.77
永赢金融租赁有限公司	2023-6-28	2026-6-26	5,495,428.72
光大金融租赁股份有限公司	2023-8-22	2025-8-22	62,500,000.00
江苏宝涵租赁有限公司	2023-6-29	2025-6-29	52,500,000.00
江苏宝涵租赁有限公司	2023-6-29	2025-6-29	7,500,000.00
芯鑫融资租赁有限责任公司	2023-9-27	2026-9-27	305,735,094.77
芯鑫融资租赁有限责任公司	2023-10-19	2026-10-18	168,781,720.56
芯鑫融资租赁有限责任公司	2023-10-20	2026-10-19	168,781,720.56
长城国兴金融租赁有限公司	2023-10-31	2025-10-30	174,000,000.00
招银金融租赁有限公司	2023-10-31	2025-10-30	75,000,000.00
中信金融租赁有限公司	2023-2-10	2026-2-10	175,000,000.00
中信金融租赁有限公司	2023-6-29	2026-6-29	66,666,666.68
北银金融租赁有限公司	2023-8-31	2025-8-31	191,070,728.83
中航国际租赁有限公司	2023-9-28	2026-9-28	29,564,952.52
中航国际租赁有限公司	2023-10-7	2026-10-7	200,000,000.00
江苏宝涵租赁有限公司	2022-12-13	2024-12-9	40,000,000.00
苏州园恒融资租赁有限公司	2024-4-19	2026-4-18	130,000,000.00
苏银金融租赁股份有限公司	2024-1-15	2026-1-15	87,977,537.00
江西金融租赁股份有限公司	2024-1-26	2026-1-26	176,132,284.85
交银金融租赁有限责任公司	2024-6-21	2027-6-15	100,000,000.00
交银金融租赁有限责任公司	2024-6-21	2026-6-15	100,000,000.00
芯鑫融资租赁有限责任公司	2024-3-29	2027-3-28	138,425,439.62
芯鑫融资租赁有限责任公司	2024-4-29	2027-4-28	650,000,000.00
交银金融租赁有限责任公司	2024-3-26	2027-3-25	200,000,000.00
交银金融租赁有限责任公司	2024-4-23	2027-4-22	300,000,000.00
招银金融租赁有限公司	2024-1-5	2026-1-4	350,000,000.00
招银金融租赁有限公司	2024-2-27	2026-2-27	437,500,000.00
浙江浙银金融租赁股份有限公司	2024-1-3	2026-1-2	88,282,311.97
太平石化金融租赁有限责任公司	2024-3-25	2026-4-25	439,549,926.90
前海兴邦金融租赁有限责任公司	2024-5-6	2026-5-5	100,000,000.00
合计			5,172,902,399.76
