# Supplementary material
Source: ML conference proceedings conference paper supplement (https://openreview.net/forum?id=xg0fmtqh8d)
Supplement: supplementary_material [file 526_维信诺:维信诺科技股份有限公司审阅报告.xlsx]

## Sheet: Sheet
项目	本期发生额	上期发生额
广告宣传费	8,624,085.81	13,234,292.44
交通费	194,470.62	333,490.96
人工费用	30,685,325.59	63,147,139.36
差旅费	5,932,355.98	12,064,910.62
业务招待费	8,605,107.59	17,105,495.87
折旧费	60,041.81	100,696.02
办公费	881,893.65	1,801,031.25
其他	694,582.56	3,915,978.65
合计	55,677,863.61	111,703,035.17
