# Supplementary material
Source: ML conference proceedings conference paper supplement (https://openreview.net/forum?id=xg0fmtqh8d)
Supplement: supplementary_material [file 527_五矿资源:截至二零二四年六月三十日止三个月之第二季度生产报告.xlsx]

## Sheet: Sheet
		截至該月止季度					年初至今
		二零二三年六月	二零二三年 九月	二零二三年 十二月	二零二四年 三月	二零二四年 六月	二零二四年 六月	二零二三年 六月
已開採礦石	噸	387,712	518,757	517,755	457,910	450,602	908,512	614,004
已處理礦石	噸	401,868	507,179	500,084	501,631	382,915	884,546	652,840
鋅
已開採礦石—品位	%	10.04	10.28	10.59	9.73	10.11	9.92	9.86
已處理礦石—品位	%	9.99	10.30	10.49	9.86	9.99	9.92	9.80
回收率	%	90.9	90.6	89.8	89.2	89.7	89.4	89.7
產量
鋅精礦	噸	73,251	95,184	95,333	90,256	68,950	159,206	115,328
品位	%	49.8	49.8	49.4	49.6	50.1	49.8	49.7
含量	噸	36,474	47,354	47,116	44,760	34,524	79,284	57,374
銷售
已銷售總量	噸	70,259	82,034	99,366	80,013	87,611	167,624	131,728
已售產品中應付金屬量	噸	28,906	33,605	40,922	32,967	36,386	69,353	54,101
鉛
已開採礦石—品位	%	1.55	1.84	2.05	1.82	1.84	1.83	1.57
已處理礦石—品位	%	1.56	1.83	2.06	1.85	1.70	1.78	1.54
回收率	%	68.0	69.3	67.4	65.7	70.8	67.8	65.3
產量
鉛精礦	噸	7,158	10,523	11,958	10,884	7,958	18,842	11,533
品位	%	59.8	61.2	57.9	56.8	58.0	57.3	56.7
含量	噸	4,279	6,441	6,927	6,181	4,618	10,799	6,540
銷售
已銷售總量	噸	3,223	9,638	8,993	14,390	9,191	23,581	13,763
已售產品中應付金屬量	噸	1,827	5,448	5,122	7,830	4,955	12,785	6,965
銀
已處理礦石—品位 已售產品中應付金屬量	克/噸 盎司	54 123,695	61 395,812	70 431,900	66 648,351	67 437,654	67 1,086,005	55 529,595
