# Supplementary material
Source: ML conference proceedings conference paper supplement (https://openreview.net/forum?id=xg0fmtqh8d)
Supplement: supplementary_material [file 528_中远海控:截至二零二三年十二月三十一日止年度全年业绩.xlsx]

## Sheet: Sheet
		每股買價
回購月份	回購股數	最高(港元╱股)	最低(港元╱股)	價格總額(港元)
八月	254,000	7.99	7.95	2,022,020.00
九月	24,658,000	8.32	7.86	199,612,985.00
十月	1,610,000	7.96	7.86	12,755,710.00
十一月	35,438,000	8.04	6.99	264,256,645.00
十二月	35,989,000	7.99	6.85	261,375,970.00
