# Supplementary material
Source: ML conference proceedings conference paper supplement (https://openreview.net/forum?id=xg0fmtqh8d)
Supplement: supplementary_material [file 529_德明利:深圳市德明利技术股份有限公司向特定对象发行股票并在主板上市募集说明书(修订稿).xlsx]

## Sheet: Sheet
项目	2023年	2022年	2021年
归属于母公司所有者的净利润	2,499.85	6,749.99	9,816.89
现金分红金额（含税）	1,471.82	1,500.00	-
最近三年累计现金分红金额	2,971.82
最近三年年均归属于母公司所有者的净利润	6,355.58
最近三年累计现金分红金额/最近三年年均归属于母公司所有者的净利润	46.76%
