# Supplementary material
Source: ML conference proceedings conference paper supplement (https://openreview.net/forum?id=xg0fmtqh8d)
Supplement: supplementary_material [file 530_药明康德:有关2024年第三次以竞价交易方式回购本公司A股计划的公告.xlsx]

## Sheet: Sheet
股份類別	股份回購前		股份回購註銷後(按股份回購下限計算)		股份回購註銷後(按股份回購上限計算)
	股份數量(單位：股)	佔已發行股本總額百分比(%)	股份數量(單位：股)	佔已發行股本總額百分比(%)	股份數量(單位:股)	佔已發行股本總額百分比(%)
有限售條件流通股份	0	0	0	0	0	0
無限售條件流通股份	2,911,927,203	100	2,895,539,134	100	2,895,539,134	100
股份總數	2,911,927,203	100	2,895,539,134	100	2,895,539,134	100
