# Supplementary material
Source: ML conference proceedings conference paper supplement (https://openreview.net/forum?id=xg0fmtqh8d)
Supplement: supplementary_material [file 531_凯盛新能:2023环境、社会与管治报告.xlsx]

## Sheet: Sheet
指標	單位	2023 年	2022 年	2021 年
總耗水量	噸	33,108,570.42	25,563,310.56	40,258,411.78
- 新鮮水取量	噸	3,096,098.00	2,421,137.82	2,146,416.58
- 循環用水總量	噸	30,012,472.42	23,142,172.74	38,111,995.2
- 循環水用量佔比	%	90.65	90.53	94.67
能源消耗總量	噸標煤	494,734.96	351,057.32	302,962.65
柴油消耗量	噸	117.85	150.43	164.29
天然氣消耗量	萬立方米	29,482.34	22,120.81	19,472
燃料油消耗量	噸	16,599 .07	/	/
其他石油製品消耗量	噸	30,674.43	27,196.79	14,167.3
光伏發電	萬千瓦時	3,199.74	1,301.74	1,236.81
餘熱餘壓發電	萬千瓦時	8,199.92	5,043.55	3,392.27
外購電力	萬千瓦時	57,518.34	33,580.18	31,538.65
工業廢水排放量	噸	896,441.52	752,631.26	1,457,321.9
廢氣污染物排放量	千克	1,057,376.97	590,034.07	410,290
二氧化硫	千克	155,400.80	89,230	71,860
氮氧化物	千克	830,955.06	472,934.07	307,100
顆粒物	千克	71,021.11	27,870	31,330
一般工業固廢處置量	噸	304,048.52	/	/
危險廢物處置量	噸	100.63	/	/
溫室氣體排放量 (範疇一)	噸二氧化碳當量	1,030,374.50	611,779.47	631,503.45
化石燃料燃燒排放量	噸二氧化碳當量	761,182.84	456,710.11	455,458.31
原料碳酸鹽分解排放量	噸二氧化碳當量	269,191.66	155,069.36	175,905.15
溫室氣體排放量 (範疇二) - 外購電力	噸二氧化碳當量	475,828.18	243,706.33	220,020.92
