# Supplementary material
Source: ML conference proceedings conference paper supplement (https://openreview.net/forum?id=xg0fmtqh8d)
Supplement: supplementary_material [file 532_德明利:深圳市德明利技术股份有限公司向特定对象发行股票并在主板上市募集说明书(修订稿).xlsx]

## Sheet: Sheet
序号	专利名称	专利类型	专利号	有效期限	权利人	法律状态	取得方式	他项权利
1	记忆模块动态备份管理系统及方法	发明	ZL200810217177.1	2008.10.31-2028.10.30	发行人	专利权维持	原始取得	否
2	一种闪存接口信息的实时解析方法和系统	发明	ZL201511026644.9	2015.12.31-2035.12.30	发行人	专利权维持	原始取得	否
3	一种抓取闪存有效信号的方法及系统以及逻辑分析仪	发明	ZL201511020067.2	2015.12.31-2035.12.30	发行人	专利权维持	原始取得	否
4	基于爬山算法的触控屏抗干扰方法、触控装置及移动终端	发明	ZL201811087120.4	2018.09.17-2038.09.16	发行人	专利权维持	原始取得	质押
5	一种用于大尺寸触摸屏的触摸屏传感器及触摸识别方法	发明	ZL201910414038.6	2019.05.17-2039.05.16	发行人	专利权维持	原始取得	质押
6	一种命令超时处理方法及系统	发明	ZL201810603200.4	2018.06.12-2038.06.11	发行人	专利权维持	原始取得	质押
7	一种数据存储方法及存储器	发明	ZL201811123529.7	2018.09.26-2038.09.25	发行人	专利权维持	原始取得	质押
8	一种基于区域镜像的角落触控识别方法、装置及移动终端	发明	ZL201811512838.3	2018.12.11-2038.12.10	发行人	专利权维持	原始取得	质押
9	一种存储数据的动态回收处理方法及存储装置	发明	ZL201811626099.0	2018.12.28-2038.12.27	发行人	专利权维持	原始取得	否
10	一种基于可移动存储的无感控制方法和系统以及设备	发明	ZL201910684007.2	2019.07.26-2039.07.25	发行人	专利权维持	原始取得	否
11	一种存储设备测试和自动分BIN的方法、装置以及设备	发明	ZL201910867062.5	2019.09.12-2039.09.11	发行人	专利权维持	原始取得	否
12	一种闪存热数据识别方法	发明	ZL201811085164.3	2018.09.18-2038.09.17	发行人	专利权维持	原始取得	否
13	基于可编程逻辑器件的加密方法及系统	发明	ZL201610988601.7	2016.11.09-2036.11.08	发行人	专利权维持	原始取得	否
14	一种ECC数据存储方法、系统及存储介质	发明	ZL201810507105.4	2018.05.24-2038.05.23	发行人	专利权维持	原始取得	否
15	一种高速的闪存模拟器及其模拟方法	发明	ZL201810532014.6	2018.05.25-2038.05.24	发行人	专利权维持	原始取得	否
16	一种对存储设备进行测试的方法和装置以及设备	发明	ZL201910314783.3	2019.04.18-2039.04.17	发行人	专利权维持	原始取得	否
17	一种LPDDR基板设计方法、LPDDR基板和电子设备	发明	ZL202010056038.6	2020.01.17-2040.01.16	发行人	专利权维持	原始取得	否
18	一种数据存储方法、存储设备及存储系统	发明	ZL201810681842.6	2018.06.27-2038.06.26	发行人	专利权维持	原始取得	否
19	一种命令队列优化管理的实现方法和系统以及设备	发明	ZL201910415027.X	2019.05.17-2039.05.16	发行人	专利权维持	原始取得	否
20	一种基于U盘的数据保护方法和装置以及设备	发明	ZL201910346922.0	2019.04.27-2039.04.26	发行人	专利权维持	原始取得	否
21	一种防止闪存比特错误放大的方法和装置以及设备	发明	ZL202010351017.7	2020.04.28-2030.04.27	发行人	专利权维持	原始取得	否
22	一种防止U盘数据丢失和系统损坏的方法和装置以及设备	发明	ZL201910384136.X	2019.05.09-2039.05.08	发行人	专利权维持	原始取得	否
23	基于OTP的主控芯片的BOOT代码扩展方法	发明	ZL201910256022.7	2019.04.01-2039.03.31	发行人	专利权维持	原始取得	否
24	一种闪存的数据引导方法和装置以及设备	发明	ZL201910615517.4	2019.07.09-2039.07.08	发行人	专利权维持	原始取得	否
25	一种提高Nandflash数据稳定性的方法以及装置	发明	ZL201910867061.0	2019.09.12-2039.09.11	发行人	专利权维持	原始取得	否
26	一种闪存的数据存储方法和装置以及设备	发明	ZL201910290439.5	2019.04.11-2039.04.10	发行人	专利权维持	原始取得	否
27	一种存储设备的测试方法和装置以及设备	发明	ZL201910314777.8	2019.04.18-2039.04.17	发行人	专利权维持	原始取得	否
28	多路输入开关消抖的方法、装置、存储介质及单片机设备	发明	ZL201910973861.0	2019.10.14-2030.10.13	发行人	专利权维持	原始取得	否
29	一种存储设备的命令序列测试方法和装置以及设备	发明	ZL202010022445.5	2020.01.09-2040.01.08	发行人	专利权维持	原始取得	否
30	平稳闪存写速度的方法、装置、存储介质和计算机设备	发明	ZL202110027038.8	2021.01.09-2041.01.08	发行人	专利权维持	原始取得	否
31	一种载货监测装置及系统	实用新型	ZL201521136584.1	2015.12.31-2025.12.30	发行人	专利权维持	原始取得	否
32	一种载货防盗监测装置及系统	实用新型	ZL201521137514.8	2015.12.31-2025.12.30	发行人	专利权维持	原始取得	否
33	一种USB智能组合插座装置	实用新型	ZL201521140179.7	2015.12.31-2025.12.30	发行人	专利权维持	原始取得	否
34	一种TF卡存储器组合测试架	实用新型	ZL201820909334.4	2018.06.12-2028.06.11	发行人	专利权维持	原始取得	否
35	一种多功能转接设备	实用新型	ZL201820939893.X	2018.06.15-2028.06.14	发行人	专利权维持	原始取得	否
36	一种用于快速烧录程序的设备	实用新型	ZL201820967075.0	2018.06.21-2028.06.20	发行人	专利权维持	原始取得	否
37	一种电阻电容收纳盒	实用新型	ZL201821019616.3	2018.06.28-2028.06.27	发行人	专利权维持	原始取得	否
38	一种手机用的便携式外接通话降噪扩音模块	实用新型	ZL201821252902.4	2018.08.06-2028.08.05	发行人	专利权维持	原始取得	否
39	一种多接口的USB转发设备	实用新型	ZL201821375267.9	2018.08.24-2028.08.23	发行人	专利权维持	原始取得	否
40	一种分体电视	实用新型	ZL201821462227.8	2018.09.07-2028.09.06	发行人	专利权维持	原始取得	否
41	通用单片机SD量产架	实用新型	ZL201821675373.9	2018.10.16-2028.10.15	发行人	专利权维持	原始取得	否
42	一种便携式储存器	实用新型	ZL201821688484.3	2018.10.18-2028.10.17	发行人	专利权维持	原始取得	否
43	一种硬盘存储装置	实用新型	ZL201821688445.3	2018.10.18-2028.10.17	发行人	专利权维持	原始取得	否
44	一种存储器	实用新型	ZL201822052427.2	2018.12.07-2028.12.06	发行人	专利权维持	原始取得	否
45	用于快速存储器质量检测的封闭式存储器成品烘烤设备	实用新型	ZL201822115399.4	2018.12.17-2028.12.16	发行人	专利权维持	原始取得	否
46	用于快速存储器质量检测的开放式存储器晶圆烘烤设备	实用新型	ZL201822122645.9	2018.12.17-2028.12.16	发行人	专利权维持	原始取得	否
47	一种板材切割钻孔设备	实用新型	ZL201822277352.8	2018.12.29-2028.12.28	发行人	专利权维持	原始取得	否
48	一种多功能复合容器	实用新型	ZL201920370820.8	2019.03.21-2029.03.20	发行人	专利权维持	原始取得	否
49	一种基于通用闪存存储器的闪存装置以及设备	实用新型	ZL201920611943.6	2019.04.28-2029.04.27	发行人	专利权维持	原始取得	否
50	一种适用于U盘测试分析架	实用新型	ZL201920657624.9	2019.05.08-2029.05.07	发行人	专利权维持	原始取得	否
51	一种适用于TF卡测试分析架	实用新型	ZL201920655730.3	2019.05.08-2029.05.07	发行人	专利权维持	原始取得	否
52	一种压针式U盘开卡测试架	实用新型	ZL201920766484.9	2019.05.24-2029.05.23	发行人	专利权维持	原始取得	否
53	一种芯片测试架	实用新型	ZL201921303984.5	2019.08.08-2029.08.07	发行人	专利权维持	原始取得	否
54	一种整合USB2.0和USB3.0通讯芯片的测试电路以及测试架	实用新型	ZL201921521474.5	2019.09.12-2029.09.11	发行人	专利权维持	原始取得	否
55	一种兼容移动固态硬盘的结构及移动固态硬盘	实用新型	ZL201921598471.1	2019.09.23-2029.09.22	发行人	专利权维持	原始取得	否
56	一种基于UFS的微型TYPE-C移动固态硬盘	实用新型	ZL201921583593.3	2019.09.23-2029.09.22	发行人	专利权维持	原始取得	否
57	一种通用串行总线集线装置和通用串行总线集线设备	实用新型	ZL201921687360.8	2019.10.10-2029.10.09	发行人	专利权维持	原始取得	否
58	一种具备大容量存储功能的SIM卡	实用新型	ZL201922402336.1	2019.12.27-2029.12.26	发行人	专利权维持	原始取得	否
59	一种SIM卡和SD卡二合一控制芯片	实用新型	ZL201922402262.1	2019.12.27-2029.12.26	发行人	专利权维持	原始取得	否
60	一种无痕测试装置	实用新型	ZL202020002534.9	2020.01.02-2030.01.01	发行人	专利权维持	原始取得	否
61	一种存储产品的高低温试验的测试装置	实用新型	ZL202020244000.7	2020.03.02-2030.03.01	发行人	专利权维持	原始取得	否
62	一种基于UFS的大容量存储SIM卡	实用新型	ZL202020707281.5	2020.04.30-2030.04.29	发行人	专利权维持	原始取得	否
63	一种转接板	实用新型	ZL202021021837.1	2020.06.06-2030.06.05	发行人	专利权维持	原始取得	否
64	一种可快速插拔用于SATA与M.2接口转换的转接头	实用新型	ZL202123321408.3	2021.12.27-2031.12.26	发行人	专利权维持	原始取得	否
65	一种HUB测试架保护壳	实用新型	ZL202123214934.X	2021.12.20-2031.12.19	发行人	专利权维持	原始取得	否
66	一种用于固态硬盘测试的SATA转接头	实用新型	ZL202122894500.2	2021.11.23-2031.11.22	发行人	专利权维持	原始取得	否
67	一种金属接触件及测试端子	实用新型	ZL202122602938.9	2021.10.26-2031.10.25	发行人	专利权维持	原始取得	否
68	一种PCB板及分板固定治具	实用新型	ZL202121866609.9	2021.08.10-2031.08.09	发行人	专利权维持	原始取得	否
69	一种外挂CC逻辑功能的移动固态硬盘电路及移动固态硬盘	实用新型	ZL202022263104.5	2020.10.13-2030.10.12	发行人	专利权维持	原始取得	否
70	一种调压电源电路以及固态硬盘测试板	实用新型	ZL202122584173.0	2022.10.26-2032.10.25	发行人	专利权维持	原始取得	否
71	行车记录仪测试架	实用新型	ZL202222259957.0	2022.08.26-2032.08.25	发行人	专利权维持	原始取得	否
72	印刷电路板及电源保护电路板	实用新型	ZL202222219153.8	2022.08.23-2032.08.22	发行人	专利权维持	原始取得	否
73	一种用于固态硬盘测试的接口保护模块	实用新型	ZL202222168107.X	2022.08.17-2032.08.16	发行人	专利权维持	原始取得	否
74	一种基于PCI-E64P接口的闪存芯片测试板卡	实用新型	ZL202221990103.3	2022.07.29-2032.07.28	发行人	专利权维持	原始取得	否
75	一种存储芯片自动高速测试设备	实用新型	ZL202221887883.9	2022.07.20-2032.07.19	发行人	专利权维持	原始取得	否
76	一种跳线焊盘以及PCB电路板	实用新型	ZL202221818960.5	2022.07.14-2032.07.13	发行人	专利权维持	原始取得	否
77	基于FPGA的仿真SD卡接口信号电平转换电路	实用新型	ZL202223538702.4	2022.12.29-2032.12.28	发行人	专利权维持	原始取得	否
78	一种USB接口转发设备	实用新型	ZL202122637671.7	2021.10.29-2031.10.28	发行人	专利权维持	原始取得	否
79	一种基于FPGA的IP测试系统及其测试电路	实用新型	ZL202223538726.X	2022.12.29-2032.12.28	发行人	专利权维持	原始取得	否
80	电流表检测电路	实用新型	ZL202223306440.9	2022.12.09-2032.12.08	发行人	专利权维持	原始取得	否
81	一种兼容UDP和MUDP的测试托盘装置	实用新型	ZL202320625730.5	2023.03.27-2033.03.26	发行人	专利权维持	原始取得	否
82	一种SATA连接器及电子设备	实用新型	ZL202321146092.5	2023.05.12-2033.05.11	发行人	专利权维持	原始取得	否
83	闪存封装模块（Type-C）	外观设计	ZL201530568776.9	2015.12.31-2025.12.30	发行人	专利权维持	原始取得	否
84	多功能转接设备	外观设计	ZL201830307920.7	2018.06.15-2028.06.14	发行人	专利权维持	原始取得	否
85	电容电阻收纳盒	外观设计	ZL201830341129.8	2018.06.28-2028.06.27	发行人	专利权维持	原始取得	否
86	存储器成品烘烤设备（封闭式）	外观设计	ZL201830731865.4	2018.12.17-2028.12.16	发行人	专利权维持	原始取得	否
87	存储器晶圆烘烤设备（开放式）	外观设计	ZL201830732268.3	2018.12.17-2028.12.16	发行人	专利权维持	原始取得	否
88	存储器吸放笔	外观设计	ZL201830771184.0	2018.12.29-2028.12.28	发行人	专利权维持	原始取得	否
89	移动固态存储硬盘（微型）	外观设计	ZL201930558525.0	2019.10.14-2029.10.13	发行人	专利权维持	原始取得	否
90	大容量SIM卡（基于UFS存储介质）	外观设计	ZL202030192437.6	2020.04.30-2030.04.29	发行人	专利权维持	原始取得	否
91	一种对闪存出错物理地址的标记方法和装置以及设备	发明	ZL201910637641.0	2019.07.15-2039.07.15	发行人	专利权维持	原始取得	否
92	一种过流短路保护电路和电子设备	实用新型	ZL202320599889.4	2023.03.15-2033.03.14	发行人	专利权维持	原始取得	否
93	测试转接模块及测试系统	实用新型	ZL202321248279.6	2023.05.22-2033.05.21	发行人	专利权维持	原始取得	否
94	检测报警电路和检测报警装置	实用新型	ZL202321320975.3	2023.05.26-2033.05.25	发行人	专利权维持	原始取得	否
95	一种基于多核处理器的高速数据流处理方法和系统	发明	ZL202110921814.9	2021.08.11-2041.08.10	发行人	专利权维持	原始取得	否
96	一种基于FPGA的闪存数据采集装置和采集方法	发明	ZL202111541250.2	2021.12.16-2041.12.15	发行人	专利权维持	原始取得	否
97	一种兼容移动固态硬盘的结构及移动固态硬盘	发明	ZL201910898738.7	2019.09.23-2039.09.22	发行人	专利权维持	原始取得	否
98	一种可控制自动断电板	实用新型	ZL202322802269.9	2023.10.19-2033.10.18	发行人	专利权维持	原始取得	否
99	一种用于监控摄像头的测试放置架	实用新型	ZL202322935482.7	2023.10.30-2033.10.29	发行人	专利权维持	原始取得	否
