# Supplementary material
Source: ML conference proceedings conference paper supplement (https://openreview.net/forum?id=xg0fmtqh8d)
Supplement: supplementary_material [file 533_广发证券:海外监管公告-广发证券股份有限公司2024年面向专业投资者公开发行短期公司债券(第四期)信用评级报告.xlsx]

## Sheet: Sheet
财务数据(单位：百万元)	2021	2022	2023
货币资金及结算备付金	147,007.20	156,856.72	153,325.60
其中：自有货币资金及结算备付金	26,363.30	25,851.53	28,839.22
买入返售金融资产	19,992.23	18,940.29	19,720.90
交易性金融资产	124,472.61	157,800.51	216,074.35
债权投资	104.69	354.13	129.71
其他债权投资	110,475.10	143,937.77	139,295.12
其他权益工具投资	872.79	727.78	5,696.95
长期股权投资	8,248.42	8,744.15	9,225.27
融出资金	97,230.77	82,822.99	91,107.90
总资产	535,855.32	617,256.28	682,181.68
代理买卖证券款	126,731.10	137,585.26	132,010.53
短期债务	184,218.68	222,970.88	268,475.83
长期债务	76,443.92	78,910.21	63,707.81
总债务	260,662.60	301,881.09	332,183.64
总负债	425,053.98	492,463.44	541,505.97
股东权益	110,801.34	124,792.84	140,675.71
净资本(母公司口径)	66,166.93	79,847.25	93,165.50
手续费及佣金净收入	18,784.57	16,363.19	14,512.34
其中：经纪业务净收入	7,970.41	6,386.85	5,810.15
投资银行业务净收入	432.64	610.37	566.32
基金管理业务净收入	8,917.28	8,153.26	7,355.86
资产管理业务净收入	1,028.41	785.89	371.79
利息净收入	4,930.92	4,101.11	3,136.02
投资收益及公允价值变动损益	7,224.62	2,200.33	4,289.64
营业收入	34,249.99	25,132.01	23,299.53
业务及管理费	(15,960.57)	(13,809.46)	(13,885.24)
营业利润	15,024.88	10,447.73	8,794.80
净利润	12,054.91	8,898.00	7,862.92
综合收益总额	12,001.31	8,587.86	8,464.82
EBITDA	23,985.80	19,360.52	19,504.17
财务指标	2021	2022	2023
盈利能力及营运效率
平均资产回报率(%)	3.16	2.00	1.53
平均资本回报率(%)	11.32	7.55	5.92
营业费用率(%)	46.60	54.95	59.59
流动性及资本充足性(母公司口径)
风险覆盖率(%)	197.71	186.58	233.36
资本杠杆率(%)	16.03	13.04	12.03
流动性覆盖率(%)	238.90	213.79	222.43
净稳定资金率(%)	163.37	147.26	129.57
净资本/净资产(%)	72.02	76.19	77.48
净资本/负债(%)	23.88	24.29	24.99
净资产/负债(%)	33.16	31.88	32.25
自营权益类证券及其衍生品/净资本(%)	49.57	47.87	31.10
自营非权益类证券及其衍生品/净资本(%)	290.54	311.13	294.25
偿债能力
资产负债率(%)	72.92	73.98	74.43
EBITDA 利息覆盖倍数(X)	2.90	2.37	1.98
总债务/EBITDA(X)	10.87	15.59	17.03
