# Supplementary material
Source: ML conference proceedings conference paper supplement (https://openreview.net/forum?id=xg0fmtqh8d)
Supplement: supplementary_material [file 534_维信诺:维信诺科技股份有限公司审阅报告.xlsx]

## Sheet: Sheet
项目名称	关联方	期末余额		期初余额
		账面余额	坏账准备	账面余额	坏账准备
银行存款	廊坊银行股份有限公司霸州支行	-	-	15.24	-
应收账款	广州国显	384,825,403.11	9,813,143.82	398,675,005.66	9,157,019.81
应收账款	合肥电子	195,658,189.62	1,067,236.07	6,695,802.20	33,479.02
应收账款	成都辰显	631,670.40	3,158.35	1,253,046.60	6,265.23
预付款项	固安九通基业公用事业有限公司	31,371.74	-	55,660.04	-
其他应收款	广州国显	261,930,970.43	126,079,291.13	261,930,970.43	121,193,097.04
其他应收款	合肥电子	372,593.26	2,090.06	137,871,547.49	3,439,357.73
其他应收款	固安京御幸福房地产开发有限公司	533,222.50	-	200,000.00	-
其他应收款	青岛电子	30,708.24	3,070.82	30,708.24	3,070.82
项目名称	关联方	期末余额		期初余额
应付票据	广州国显	2,643,000,000.00		710,000,000.00
应付账款	广州国显	4,655,708,689.70		4,562,916,380.92
应付账款	合肥电子	219,304,023.61		154,153.33
应付账款	成都辰显	475,752.21		1,584,477.88
应付账款	固安九通基业公用事业有限公司	1,694,744.92		1,850,297.59
应付账款	固安九通新盛园区建设发展有限公司	739,177.42		753,220.74
应付账款	幸福基业物业服务有限公司固安分公司	51,891.69		51,891.69
应付账款	固安京御幸福房地产开发有限公司	-		6,337,854.49
合同负债	成都辰显	777,164.60		1,561,980.50
其他应付款	幸福基业物业服务有限公司固安分公司	400.00		840.00
