# Supplementary material
Source: ML conference proceedings conference paper supplement (https://openreview.net/forum?id=xg0fmtqh8d)
Supplement: supplementary_material [file 535_维信诺:维信诺科技股份有限公司审阅报告.xlsx]

## Sheet: Sheet
税种	计税依据	税率	备注
增值税	境内销售；提供加工、劳务	13%	-
	提供交通运输、邮政、基础电信、建筑、不动产租赁服务，销售不动产，转让土地使用权	9%	-
	其他应税销售服务行为	6%	-
城市维护建设税	实缴流转税税额	7%、5%	-
教育费附加	实缴流转税税额	3%	-
地方教育费附加	实缴流转税税额	2%	-
房产税	按照房产原值的70%（或租金收入）为纳税基准	1.2%、12%	-
企业所得税	应纳税所得额	25%、15%、16.50%、29.84%、20%	-
