# Supplementary material
Source: ML conference proceedings conference paper supplement (https://openreview.net/forum?id=xg0fmtqh8d)
Supplement: supplementary_material [file 536_Cross-Data Knowledge Graph Construction for LLM-enabled Educational Question-Answering System_ A Case Study at HCMUT.xlsx]

## Sheet: Sheet
Objects	Method	Term Replace
Person Name	NER (BERT)	[full_name]
Student ID	Regex (7 number format)	[student_id]
Phone number	Regex (10 number format)	[phone_number]
Email	Regex (ordinary email with @)	[email]
