# Supplementary material
Source: ML conference proceedings conference paper supplement (https://openreview.net/forum?id=xg0fmtqh8d)
Supplement: supplementary_material [file 537_GlitchProber_ Advancing Effective Detection and Mitigation of Glitch Tokens in Large Language Models.xlsx]

## Sheet: Sheet
Sampling Rate	γ= 0.1	γ= 0.2	γ= 0.3	γ= 0.5	γ= 0.7
Precision	100%	100%	100%	100%	100%
Recall	69.22%	72.81%	74.57%	76.65%	78.12%
F1 Score	81.81%	84.26%	85.43%	86.78%	87.72%
Time	61min 38s	68min 14s	74min 30s	86min 52s	100min 41s
