# Supplementary material
Source: ML conference proceedings conference paper supplement (https://openreview.net/forum?id=xg0fmtqh8d)
Supplement: supplementary_material [file 538_Contrasting Linguistic Patterns in Human and LLM-Generated News Text.xlsx]

## Sheet: Sheet
	Human	M7B	F7B	LL7B	LL13B	LL30B	LL65B
Human	1	<0.001	<0.001	<0.001	<0.001	<0.001	<0.001
M7B	<0.001	1	<0.001	0.248	0.463	0.109	0.004
F7B	<0.001	<0.001	1	<0.001	<0.001	<0.001	<0.001
LL7B	<0.001	0.248	<0.001	1	0.674	0.627	0.075
LL13B	<0.001	0.463	<0.001	0.674	1	0.372	0.030
LL30B	<0.001	0.109	<0.001	0.627	0.372	1	0.206
LL65B	<0.001	0.004	<0.001	0.075	0.030	0.206	1
