# Supplementary material
Source: ML conference proceedings conference paper supplement (https://openreview.net/forum?id=xg0fmtqh8d)
Supplement: supplementary_material [file 539_HowToCaption_ Prompting LLMs to Transform Video Annotations at Scale.xlsx]

## Sheet: Sheet
Caption Post-processing	YouCook2		MSR-VTT		MSVD		LSMDC		Average
	R10↑	MR↓	R10↑	MR↓	R10↑	MR↓	R10↑	MR↓	R10↑	MR↓
Lower bound: original ASR as supervision	39.3	20	61.7	5	77.1	2	31.5	56	52.4	20.8
No post-processing	40.2	18	65.9	4	79.8	2	34.4	40	55.1	16.0
Filtering (using BLIP)	42.5	16	71.2	3	81.7	2	37.4	30	58.2	12.8
Alignment & filtering (using BLIP)	42.4	17	71.7	3	82.2	2	38.5	29.5	58.7	12.9
Alignment & filtering (with ours)	44.1	15	73.3	3	82.1	2	38.6	29	59.5	12.3
