# Supplementary material
Source: ML conference proceedings conference paper supplement (https://openreview.net/forum?id=xg0fmtqh8d)
Supplement: supplementary_material [file 540_A Survey on Large Language Models from General Purpose to Medical Applications_ Datasets, Methodologies, and Evaluations.xlsx]

## Sheet: Sheet
Models	Types	Machine Evaluation		Human-Centric Evaluation
		Metrics	Protocols	Evaluator	Dimensions	Protocols
Med-PaLM [130]	STQA, MCQA	Accuracy	Zero., Few.	Human	Professional, Safe, Helpful	Individual
ChatDoctor [91]	STQA	BERTScore	Zero.	Human		Case Study
DoctorGLM [172]				Human		Case Study
BenTsao [151]	STQA			Human	Safe, Fluent, Helpful	Individual
ChatGLM-Med [55]				Human		Case Study
MedAlpaca [54]	MCQA	Accuracy	Zero.
PMC-LLaMA [167]	MCQA	Accuracy BLEU, ROUGE,	Zero., SFT
HuatuoGPT [188]	STQA, MTQA	GLEU, Distinct	Zero.	Human, LLM	Professional, Proactive,Doctor-like, Patient-friendly	Pairwise
ChatMed-Consult [164]				Human		Case Study
Med-PaLM 2 [131]	STQA, MCQA	Accuracy	Zero., Few.	Human	Professional, Safe, Helpful	Individual, Pairwise
Clinical Camel [144]	MCQA	Accuracy	Zero., Few.
ShenNong-TCM [163]				Human		Case Study
MedicalGPT [174]				Human		Case Study
ClinicalGPT [150]	STQA, MCQA	BLEU, ROUGE, GLEU, Accuracy	Zero.	LLM	Professional, Safe, Helpful	Pairwise
DISC-MedLLM [11]	MTQA, MCQA	Accuracy	Zero., Few.	LLM	Proactive, Professional, Helpful	Individual
Zhongjing [179]	STQA, MTQA			Human, LLM	Professional, Safe, Fluent	Pairwise, Case Study
BianQue [23]	MTQA	BLEU, ROUGE, PQA	Zero.	Human		Case Study
Alpacare [195]	STQA, MTQA	Accuracy, ROUGE	Zero., Few.	Human, LLM	Professional, Helpful	Pairwise, Case Study
Qilin-Med [180]	STQA, MTQA	F1-Score, BLEU, ROUGE	Zero., Few., SFT	Human		Case Study
Taiyi [102]	MTQA, NLP	F1-Score, Accuracy	Zero.	Human		Case Study
ChiMed-GPT [142]	STQA, MTQA, MCQA, NLP	F1-Scores, Accuracy, BLEU, ROUGE	Zero., Few.	Human		Case Study
MediTron [24]	MCQA	Accuracy	Zero., Few., SFT
HuatuoGPT-II [22]	STQA, MTQA,	Accuracy	Zero.	Human, LLM	Professional, Helpful, Patient-friendly, Fluent	Pairwise, Case Study
AntGLM-Med [89]	MCQA MCQA	Accuracy	Few., SFT
GPT-doctor [155]	STQA			Human, LLM	Professional, Fluent, Patient-friendly, Doctor-like,	Individual, Pairwise
EpilepsyLLM [200]	STQA	BLEU, ROUGE, METEOR, SPICE	Zero.
BioMistral [79]	MCQA	Accuracy	Zero., Few., SFT
MMedLM [121]	STQA, MCQA	Accuracy, BLEU, ROUGE, BERTScore	Zero., SFT	Human, LLM	Professional	Pairwise
InMD-X [53]				Human		Case Study
Me-LLaMA [171]	MCQA, NLP	Accuracy, F1-score, ROUGE, BERTScore	Zero., Few., SFT
JMLR [153]				Human		Case Study
BiMediX [118]	MCQA	Accuracy	Zero.
OncoGPT [69]	STQA	BERTScore	Zero.	Human		Case Study
Apollo [156]	MCQA	Accuracy	Few.
Qibo [189]	STQA, MCQA, NLP	Accuracy, ROUGE	Zero.	Human, LLM	Professional, Safe, Fluent	Pairwise
Hippocrates [3]	MCQA	Accuracy	Zero., Few.
MING-MOE [94]	STQA, MCQA	F1, ROUGE, Accuracy	Zero.	Human		Case Study
Lingdan [67]	STQA, MTQA	Top@K	Zero.,
Aloe [51]	STQA, MCQA	Accuracy, ASR	Zero., Few.
PediatricsGPT [177]	STQA	BLEU, ROUGE, GLEU, Distinct	Zero.	Human, LLM	Professional, Helpful, Safe, Fluent	Pairwise, Case Study
Aqulia-Med [198]	STQA, MTQA, MCQA	Accuracy	Zero., Few.	LLM	Professional, Fluent, Helpful	Pairwise
