# Supplementary material
Source: ML conference proceedings conference paper supplement (https://openreview.net/forum?id=xg0fmtqh8d)
Supplement: supplementary_material [file 541_Large Language Model-Based Agents for Software Engineering_ A Survey.xlsx]

## Sheet: Sheet
Agents	Multi-Agent	Process Model	Roles Creation	Collaboration Mode	Communication Protocal
Self-Collaboration [4]	✓	Waterfall	Pre-defined	Ordered	Natural Language
Low-code LLM [183]	✓	-	Pre-defined	Ordered	Natural Language
Prompt Sapper [184]	×	-	Pre-defined	Ordered	Natural Language
Talebirad et al. [185]	✓	-	Dynamic	Ordered	Natural Language
ChatDev [186]	✓	Waterfall	Pre-defined	Dual-role	Natural Language
MetaGPT [187]	✓	Waterfall	Pre-defined	Ordered	Structured
AgentVerse [188]	✓	-	Dynamic	Ordered	Natural Language
AutoAgents [189]	✓	-	Dynamic	Ordered	Natural Language
Qian et al. [190]	✓	-	Pre-defined	Ordered	Natural Language
AISD [191]	✓	Waterfall	Pre-defined	Ordered	Natural Language
LLM4PLC [192]	×	-	Pre-defined	Ordered	Natural Language
CodePori [193]	✓	-	Pre-defined	Ordered	Natural Language
LCGWaterfall [194]	✓	Waterfall	Pre-defined	Ordered	Natural Language
LCGScrum [194]	×	Agile	Pre-defined	Debate	Natural Language
CodeS [195]	✓	-	Pre-defined	Ordered	Natural Language
Qian et al. [196]	✓	-	Pre-defined	Ordered	Natural Language
CTC [197]	✓	Waterfall	Pre-defined	Dual-role	Natural Language
AgileCoder [198]	✓	Agile	Pre-defined	Dual-role	Natural Language
