# Supplementary material
Source: ML conference proceedings conference paper supplement (https://openreview.net/forum?id=xg0fmtqh8d)
Supplement: supplementary_material [file 542_Knowledge Transfer from High-Resource to Low-Resource Programming Languages for Code LLMs.xlsx]

## Sheet: Sheet
Model	Baseline	MultiPL-T	No Validation
StarCoderBase-1B	4.7	11.3	8.6
StarCoderBase-15B	11.8	21.0	11.6
