# Supplementary material
Source: ML conference proceedings conference paper supplement (https://openreview.net/forum?id=xg0fmtqh8d)
Supplement: supplementary_material [file 543_TACO-RL_ Task Aware Prompt Compression Optimization with Reinforcement Learning.xlsx]

## Sheet: Sheet
Models	Bleu	Rouge1	Rouge2	RougeL	BertScore F1
0.50 (2x compression)
LLMLingua-2 - CodeSearchNet	4.74	27.06	8.08	18.63	80.71
LLMLingua-2 - Py150	4.15 (-0.59)	27.10 (+0.04)	7.70 (-0.38)	18.38 (-0.25)	80.75 (+0.04)
LLMLingua	7.01 (+2.27)	31.35 (+4.29)	13.09 (+5.01)	23.35 (+4.72)	81.48 (+0.78)
Selective Context	-	-	-	-	-
TACO-RL - with Rouge1	9.57 (+4.83)	34.97 (+7.91)	15.85 (+7.77)	26.20 (+7.57)	81.85 (+1.14)
TACO-RL - with Bleu	11.23 (+6.49)	35.66 (+8.60)	17.98 (+9.90)	27.36 (+8.73)	82.03 (+1.32)
0.33 (3x compression)
LLMLingua-2 - CodeSearchNet	2.84	23.72	5.54	16.08	80.25
LLMLingua-2 - Py150	2.82 (-0.02)	23.68 (-0.04)	5.24 (-0.30)	15.74 (-0.34)	80.27 (+0.02)
LLMLingua	3.81 (+0.97)	26.44 (+2.72)	8.27 (+2.72)	18.79 (+2.71)	80.72 (+0.46)
Selective Context	-	-	-	-	-
TACO-RL - with Rouge1	8.13 (+5.29)	34.18 (+10.46)	14.55 (+9.01)	25.54 (+9.46)	81.80 (+1.55)
TACO-RL - with Bleu	9.87 (+7.03)	35.94 (+12.22)	17.97 (+12.43)	27.60 (+11.52)	82.18 (+1.93)
0.25 (4x compression)
LLMLingua-2 - CodeSearchNet	2.26	21.99	4.54	14.78	80.05
LLMLingua-2 - Py150	2.36 (+0.10)	22.37 (+0.38)	4.40 (-0.14)	14.86 (+0.08)	80.11 (+0.06)
LLMLingua	2.28 (+0.03)	23.64 (+1.65)	5.78 (+1.23)	16.41 (+1.64)	80.24 (+0.18)
Selective Context	-	-	-	-	-
TACO-RL - with Rouge1	6.27 (+4.01)	33.19 (+11.20)	13.37 (+8.83)	24.58 (+9.80)	81.75 (+1.70)
TACO-RL - with Bleu	8.18 (+5.92)	35.49 (+13.50)	17.40 (+12.86)	27.43 (+12.65)	82.24 (+2.19)
0.20 (5x compression)
LLMLingua-2 - CodeSearchNet	1.97	21.01	3.99	14.21	79.96
LLMLingua-2 - Py150	1.88 (-0.09)	21.07 (+0.06)	3.83 (-0.16)	14.14 (-0.07)	79.98 (+0.02)
LLMLingua	1.45 (-0.52)	21.39 (+0.37)	4.27 (+0.29)	14.74 (+0.53)	79.94 (-0.02)
Selective Context	-	-	-	-	-
TACO-RL - with Rouge1	4.98 (+3.01)	31.84 (+10.83)	12.03 (+8.04)	23.68 (+9.47)	81.63 (+1.67)
TACO-RL - with Bleu	7.02 (+5.05)	34.96 (+13.95)	16.90 (+12.91)	26.90 (+12.69)	82.16 (+2.20)
0.166 (6x compression)
LLMLingua-2 - CodeSearchNet	1.64	20.14	3.48	13.56	79.87
LLMLingua-2 - Py150	1.78 (+0.14)	20.69 (+0.55)	3.47 (-0.01)	13.95 (+0.39)	79.92 (+0.05)
LLMLingua	1.04 (-0.61)	19.93 (-0.21)	3.42 (-0.06)	13.70 (+0.14)	79.72 (-0.15)
Selective Context	-	-	-	-	-
TACO-RL - with Rouge1	4.22 (+2.58)	30.96 (+10.82)	11.58 (+8.10)	23.00 (+9.44)	81.58 (+1.71)
TACO-RL - with Bleu	6.01 (+4.37)	34.31 (+14.17)	16.10 (+12.62)	26.36 (+12.80)	82.12 (+2.25)
Results with Original Prompts	9.80	33.83	15.79	25.39	81.69
