# Supplementary material
Source: ML conference proceedings conference paper supplement (https://openreview.net/forum?id=xg0fmtqh8d)
Supplement: supplementary_material [file 544_Controlled LLM-based Reasoning for Clinical Trial Retrieval.xlsx]

## Sheet: Sheet
Level	Recall	Precision	Mean CTRs per Patient
1	0.433	0.741	81.54
2	0.491	0.601	113.94
3	0.625	0.412	211.58
4	0.659	0.310	296.32
