# Supplementary material
Source: ML conference proceedings conference paper supplement (https://openreview.net/forum?id=xg0fmtqh8d)
Supplement: supplementary_material [file 545_Can VLMs Play Action Role-Playing Games_ Take Black Myth Wukong as a Study Case.xlsx]

## Sheet: Sheet
Agents	Agent Type	Game	Game Type	Environment
Reflexion [20]	LLM-based	ALFWorld	Text-based Adventure	API
ReAct [31]	LLM-based	ALFWorld	Text-based Adventure	API
Voyager [24]	LLM-based	Minecraft	Sandbox	API
CreativeAgent [33]	VLM-based	Minecraft	Sandbox	API and Screen
Cradle [22]	VLM-based	RDR2	AAA Action Adventure	Screen
DQN [1]	RL-based	Sekiro	AAA Action Role-Playing	Screen
Other Project [23, 7]	RL-based	BMW	AAA Action Role-Playing	Screen
VARP (Ours)	VLM-based	BMW	AAA Action Role-Playing	Screen
