# Supplementary material
Source: ML conference proceedings conference paper supplement (https://openreview.net/forum?id=xg0fmtqh8d)
Supplement: supplementary_material [file 546_Crafting Personalized Agents through Retrieval-Augmented Generation on Editable Memory Graphs.xlsx]

## Sheet: Sheet
Data Quality	QA	AF	US
Human Evaluation	91.1%	87.5%	97.4%
GPT-4 Evaluation	93.3%	98.7%	99.3%
