# Supplementary material
Source: ML conference proceedings conference paper supplement (https://openreview.net/forum?id=xg0fmtqh8d)
Supplement: supplementary_material [file 547_Latency Adjustable Transformer Encoder for Language Understanding.xlsx]

## Sheet: Sheet
Modela	Method	CoLA	SST-2	MRPC	QQP	QNLI	RTE	MNLIM	MNLIMM	Avg Drop	FLOPs	Speedup
BERT-base	-	52.7	93.5	88.7	71.2	91.0	68.9	84.7	83.8	0.00	22.5B	1.0x
DistilBERT	KD	51.3	91.3	87.5	70.1	89.2	59.9	82.2	-	2.74	11.3B	1.7x
TinyBERT	KD	51.1	93.1	87.3	71.6	90.4	70	84.6	83.2	0.40	11.3B	2.0x
MobileBERTb	KD	50.5	92.8	88.8	70.2	90.6	66.2	83.3	82.6	1.19	5.7B	5.5x
PoWER-BERTc	Pruning	52.3	92.1	88.1	70.2	90.1	67.4	83.8	83.1	0.92	-	2.9x
LayerDrop	Pruning	-	92.5	-	-	89.4	-	82.9	-	1.47	11.3	1.7x
FPT	Pruning	-	92.6	-	-	90.3	-	83.5	-	0.93	14.5	1.5x
This Work	Pruning	53.4	92.6	88.0	70.1	90.2	67.9	83.7	82.7	0.73	7.7B	2.9x
