# Supplementary material
Source: ML conference proceedings conference paper supplement (https://openreview.net/forum?id=xg0fmtqh8d)
Supplement: supplementary_material [file 548_Attention Prompting on Image for Large Vision-Language Models.xlsx]

## Sheet: Sheet
Symbol	Definition	Mainly used in
f	LVLM used for inference	Entire Sec. 3
g	Auxiliary LVLM used for attribution map extraction	Entire Sec. 3
A	Annotation function, which is the proposed method	Entire Sec. 3
I	Original image	Entire Sec. 3
Ia	Image with annotations, which is obained by visual prompting method	Entire Sec. 3
Ψ	Attribution map in the token space, which is ex- tracted from the auxiliary LVLM and is used to gen- erate the heatmap	Entire Sec. 3
Φ	Heatmap in the pixel space, which will be overlied on the original image	Entire Sec. 3
T i	Input text query	Entire Sec. 3
T o	Output text response	Entire Sec. 3
A(l,h)	Attention map in the l-th transformer layer corre- sponding to the h-th head	Entire Sec. 3
gclip	CLIP model	Sec. 3.1
ˆ I	Image feature generated by CLIP, which is able to calculate the similarity	Sec. 3.1
ˆ T	Text feature generated by CLIP, which is able to cal- culate the similarity	Sec. 3.1
L	Number of transformer layers within the CLIP vision encoder	Sec. 3.1
MSA	Multihead Self-Attention structure	Sec. 3.1
MLP	Multi-Layer Perceptron structure	Sec. 3.1
Zl	Input token sequence for the l-th transformer layer	Sec. 3.1
[Z]cls	Value of the cls token within the token sequence Z.	Sec. 3.1
Symbol	Definition	Mainly used in
L	Linear transformation in the CLIP model, which is performed after the transformer structure, before cal- culating the similarity score	Sec. 3.1
L′	In the similarity decomposition of the CLIP model, only the MSA output of last L −L′ layers are con- sidered. L′ is the starting layer index.	Sec. 3.1
V (l,h)	Value matrix in the l-th layer corresponding to the h-th head	Sec. 3.1
W (l,h)	Weight matrix in the l-th layer used to merge the multiple attention heads and corresponds to the h- th head. For each head, after the the multiplication between the attention map and the value matrix, we have a matrix with the size of T × D′. To aggregate the matrices from all heads, a weight matrix with the size of (H × D′) × D is used. W (l,h) is obtained from splitting this large weight matri…	Sec. 3.1
B(l)	Bias matrix in the l-th layer used to merge the mul- tiple attention heads	Sec. 3.1
A(l,h) cls,t	Attention value of the class token towards the t-th token in A(l,h)	Sec. 3.1
V (l,h) t,:	t-th row of V (l,h)	Sec. 3.1
H	Number of attention heads	Sec. 3.1
T	Number of tokens	Sec. 3.1
ηl t	MSA output of the l-th layer corresponding to the t-th patch(token)}	Sec. 3.1
ψt	ηl t summing over the layer index	Sec. 3.1
Ψ cls	Attribution map generated from the CLS token	Sec. 3.1
Ψ comp	Complementary attribution map generated using the non-CLS token	Sec. 3.1
Ztext	N tokens corresponding to the text query	Sec. 3.2
Zimg	P P tokens corresponding to the image patches	Sec. 3.2
Zout M	× tokens generated by the LLaVA model	Sec. 3.2
A( ̄ L,h) m,t	Attention value in A( ̄ L,h) from the m-th token to the t-th token	Sec. 3.2
ˆ Φ	Raw heatmap, which is generated by resizing the at- tribution map	Sec. 3.3
