# Supplementary material
Source: ML conference proceedings conference paper supplement (https://openreview.net/forum?id=xg0fmtqh8d)
Supplement: supplementary_material [file 549_A Survey on Large Language Models from General Purpose to Medical Applications_ Datasets, Methodologies, and Evaluations.xlsx]

## Sheet: Sheet
Models	Backbone	Para. (B)	CP	IFT	IFT Methods	HA	Preferred Languages	Open Sources	Date
Med-PaLM [130]	PaLM [26]	540		✓	Prompt Tuning		EN		01/2023
ChatDoctor [91]	LLaMA [145]	7		✓	Full Para.		EN	✓	03/2023
DoctorGLM [172]	ChatGLM [184]	6		✓	LoRA		CN	✓	04/2023
BenTsao [151]	LLaMA [145]	7		✓	LoRA		CN	✓	04/2023
ChatGLM-Med [55]	ChatGLM [184]	6		✓	LoRA		CN	✓	04/2023
MedAlpaca [54]	LLaMA [145]	7, 13		✓	Full Para.,LoRA		CN	✓	04/2023
PMC-LLaMA [167]	LLaMA2 [146]	13	✓	✓	Full Para.		CN	✓	04/2023
HuatuoGPT [188]	Baichuan [176], Ziya-LLaMA [190]	7, 13		✓	Full Para.	✓	CN	✓	05/2023
ChatMed-Consult [164]	LLaMA [145]	7		✓	LoRA		CN	✓	05/2023
Med-PaLM 2 [131]	PaLM2 [7]	-		✓	-		EN		05/2023
Clinical Camel [144]	LLaMA2 [146]	13, 70		✓	QLoRA		EN	✓	05/2023
ShenNong-TCM [163]	LLaMA [145]	7		✓	LoRA		CN	✓	06/2023
MedicalGPT [174]	Ziya-LLaMA [190], [176]	13	✓	✓	LoRA	✓	EN, CN	✓	06/2023
ClinicalGPT [150]	Baichuan-Chat BLOOM [80]	7		✓	LoRA	✓	CN		06/2023
DISC-MedLLM [11]	Baichuan [176]	13		✓	Full Para.		CN	✓	08/2023
Zhongjing [179]	Ziya-LLaMA [190]	13	✓	✓	LoRA	✓	CN	✓	08/2023
BianQue [23]	ChatGLM [184]	6		✓	Full Para.		CN	✓	10/2023
Alpacare [195]	LLaMA [145]	7, 13		✓	Full Para.		EN	✓	10/2023
Qilin-Med [180]	Baichuan [176]	7	✓	✓	LoRA	✓	CN	✓	10/2023
Taiyi [102]	Qwen [8]	7		✓	QLoRA		EN, CN	✓	11/2023
ChiMed-GPT [142]	Ziya-LLaMA [190]	13	✓	✓	Full Para.	✓	CN	✓	11/2023
MediTron [24]	LLaMA2 [146]	7, 70	✓	✓	Full Para.		EN	✓	11/2023
HuatuoGPT-II [22]	Baichuan2 [176], Yi [181]	7, 13, 34		✓	Full Para.		CN	✓	12/2023
AntGLM-Med [89]	GLM [36]	10	✓	✓	Full Para., LoRA, Cpoly		EN, CN		12/2023
GPT-doctor [155]	Baichuan2-Chat [176]	13		✓	LoRA		CN		12/2023
EpilepsyLLM [200]	LLM-JP [62], LLaMA [145]	1.3, 7		✓	LoRA		EN, JP	✓	01/2024
BioMistral [79]	Mistral-Instruct [70]	7	✓	✓	QLoRA		Multilingual	✓	02/2024
MMedLM [121]	InternLM [138]	7	✓	✓	Full Para., LoRA		Multilingual	✓	02/2024
InMD-X [53]	Neural-Chat [103]	7	✓	✓	Full Para., LoRA		EN		02/2024
Me-LLaMA [171]	LLaMA2 [146]	13, 70	✓	✓	LoRA		EN	✓	02/2024
JMLR [153]	LLaMA2 [146]	7, 13	✓	✓	-		EN		02/2024
BiMediX [118]	Mixtral-8x7B [71]	8x7		✓	QLoRA		EN, Arabic	✓	02/2024
OncoGPT [69]	LLaMA [145]	7		✓	LoRA		EN	✓	02/2024
Apollo [156]	Qwen [8], Gemma [137], Yi [181]	0.5, 1.8, 2, 6, 7	✓	✓	Full Para.		Multilingual	✓	03/2024
Qibo [189]	LLaMA [145]	7, 13	✓	✓	Full Para.		CN		03/2024
Hippocrates [3]	LLaMA2 [146], Mistral [70]	7	✓	✓	LoRA	✓	EN, CN	✓	04/2024
MING-MOE [94]	Qwen1.5-Chat [8]	1.8, 4, 7, 14		✓	LoRA		EN, CN	✓	04/2024
Lingdan [67]	Baichuan2 [176]	13	✓	✓	QLoRA		EN, CN	✓	04/2024
Aloe [51]	Mistral [70], LLaMA3 [5]	7, 8		✓	Full Para.	✓	EN	✓	05/2024
PediatricsGPT [177]	Baichuan2 [176]	7, 13	✓	✓	Full Para., LoRA	✓	CN		06/2024
Aqulia-Med [198]	Aquila [170]	7	✓	✓	Full Para.	✓	EN, CN	✓	06/2024
