# Supplementary material
Source: ML conference proceedings conference paper supplement (https://openreview.net/forum?id=xg0fmtqh8d)
Supplement: supplementary_material [file 550_Speech Recognition Rescoring with Large Speech-Text Foundation Models.xlsx]

## Sheet: Sheet
Dataset	Hours	Modality
Librispeech [28]	960	Speech, Text
Librilight [29]	60k	Speech
Multi-lingual librispeech [30]	50k	Speech, Text
People Speech [31]	30k	Speech, Text
CoVOST2 [32]	3500	Speech, Text
TEDLIUM-3 [33]	452	Speech, Text
De-identified Internal data	791	Speech, Text
