# Supplementary material
Source: ML conference proceedings conference paper supplement (https://openreview.net/forum?id=xg0fmtqh8d)
Supplement: supplementary_material [file 551_Video-XL_ Extra-Long Vision Language Model for Hour-Scale Video Understanding.xlsx]

## Sheet: Sheet
Model	LLM-size	MLVU		VideoMME w/o sub.				VideoMME w sub.
		M-avg	G-avg	Short	Medium	Long	Avg	Short	Medium	Long	Avg
Proprietary Models
GPT-4V [1]	-	49.2	5.35	70.5	55.8	53.5	59.9	73.2	59.7	56.9	63.3
GPT-4o [30]	-	64.6	5.80	80.0	70.3	65.3	71.9	82.8	76.6	72.1	77.2
Gemini-1.5-Pro [31]	-	-	-	81.7	74.3	67.4	75.0	84.5	81.0	77.4	81.3
Claude3-Opus [32]	-	36.5	3.39	71.0	57.4	51.2	60.0	73.5	60.1	54.7	62.9
Open-source MLLMs
VideoChat2 [33]	7B	47.9	3.99	48.3	37	33.2	39.5 -	52.8	39.4	39.2	43.8
LLaMA-VID [34]	7B	33.2	4.22	-	-	-	-	-	-	-
VideoLLaVA [35]	7B	47.3	3.84	45.3	38.0	36.2	39.9	46.1	40.7	38.1	41.6
Shargpt4Video [36]	7B	46.4	3.77	48.3	36.3	35.0	39.9	53.6	39.3	37.9	43.6
InternVL-Chat-V1.5 [37]	20B	50.4	4.02	60.2	46.4	45.6	47.8	61.7	49.1	46.6	52.4
LongVA [19]	7B	56.3	4.33	61.1	50.4	46.2	52.6	61.6	53.6	47.6	54.3
LongVILA [20]	7B	-	-	61.8	49.7	39.7	50.5	-	-	-	-
Long-LLaVA [15]	13B	-	-	61.9	51.4	45.4	52.9	66.2	54.7	50.3	57.1
Video-XL	7B	57.0	4.40	58.2	48.9	45.8	51.0	62.1	51.9	49.3	54.4
