# Supplementary material
Source: ML conference proceedings conference paper supplement (https://openreview.net/forum?id=xg0fmtqh8d)
Supplement: supplementary_material [file 552_A systematic evaluation of large language models for biomedical natural language processing_ benchmarks, baselines, and recommendations.xlsx]

## Sheet: Sheet
	Training	Validation	Testing	Primary metrics	Secondary metrics
Named entity recognition
BC5CDR-chemical [43]	4,560	4,581	4,797	Entity-level F1 [43, 44]
NCBI-disease [45]	5,424	923	940	Entity-level F1 [16, 45]
Relation extraction
ChemProt [46]	19,460	11,820	16,943	Macro F1 [47]	Micro F1 [46, 47]
DDI2013 [48]	18,779	7,244	5,761	Macro F1 [48, 49]	Micro F1 [16]
Multi-label document classification
HoC [50]	1,108	157	315	Macro F1 [50, 51]	Micro F1 [51]
LitCovid [52]	24,960	6,239	2,500	Macro F1 [52]	Micro F1 [52]
Question answering
MedQA 5-option [53]	10,178	1,272	1,273	Accuracy [53]	Macro F1 [54]
PubMedQA [55]	190,142	21,127	500	Accuracy [55]	Macro F1 [54]
Text summarization
PubMed Text Summarization1[56]	117,108	6,631	6,658	Rouge-L [56]	BERT Score [57], BART Score [58]
MS^22[59]	14,188	2,021	-	Rouge-L [59]	BERT Score [60], BART Score [34]
Text simplification
Cochrane PLS [61]	3,568	411	480	Rouge-L [61]	FKGL [62], DCRS [63]
PLOS Text Simplification [64]	26,124	1,000	1,000	Rouge-L [64]	FKGL [64], DCRS [64]
