# Supplementary material
Source: ML conference proceedings conference paper supplement (https://openreview.net/forum?id=xg0fmtqh8d)
Supplement: supplementary_material [file 553_Geo-Llama_ Leveraging LLMs for Human Mobility Trajectory Generation with Spatiotemporal Constraints.xlsx]

## Sheet: Sheet
Dataset	Model	Trajectory-level					Global-level (↓)
		Distance	G-radius	Duration	(↓) DailyLoc	I-rank	G-rank	Transition	Top-K Transition
GeoLife	GRU w/ FI	0.0078	0.0997	0.0479	0.1618	0.0157	0.0173	0.0385	0.0477
	LSTM w/ FI	0.0145	0.1063	0.1151	0.2183	0.0115	0.0242	0.0438	0.0521
	Transformer w/ FI	0.0080	0.0458	0.0962	0.0980	0.0232	0.0242	0.0469	0.0555
	VAE w/ FI	0.3286	0.6452	0.2719	0.6849	0.0221	0.1324	0.0595	0.0781
	MoveSim w/ FI	0.0030	0.0173	0.0317	0.1646	0.0216	0.0139	0.0349	0.0456
	SeqGAN w/ FI	0.0051	0.0613	0.0140	0.3059	0.0364	0.0208	0.0333	0.0438
	Geo-Llama	0.0007	0.0098	0.0014	0.0016	0.0061	0.0000	0.0209	0.0384
MobilitySyn	GRU w/ FI	0.0089	0.2551	0.0381	0.1784	0.0000	0.0251	0.0069	0.0146
	LSTM w/ FI	0.0132	0.2639	0.0806	0.2254	0.0000	0.0277	0.0063	0.0140
	Transformer w/ FI	0.0243	0.2894	0.1225	0.3132	0.0000	0.0286	0.0057	0.0152
	VAE w/ FI	0.3044	0.6555	0.2624	0.6920	0.0248	0.0991	0.0124	0.0150
	MoveSim w/ FI	0.0066	0.0815	0.0995	0.1000	0.0360	0.0243	0.0166	0.0464
	SeqGAN w/ FI	0.0051	0.1695	0.0487	0.0816	0.0034	0.0242	0.0076	0.0174
	Geo-Llama	0.0021	0.0704	0.0217	0.1784	0.0000	0.0278	0.0073	0.0154
