# Supplementary material
Source: ML conference proceedings conference paper supplement (https://openreview.net/forum?id=xg0fmtqh8d)
Supplement: supplementary_material [file 554_Policy Filtration in RLHF to Fine-Tune LLM for Code Generation.xlsx]

## Sheet: Sheet
Family	Method	HumanEval	MBPP	LeetCode
Supervised Fine-Tuning	SFT	74.2	70.8	15.2
	RAFT (Dong et al., 2023)	76.9	71.3	17.8
	BOND (Sessa et al., 2024)	80.8	75.2	30.0
Direct Policy Optimization	DPO (Rafailov et al., 2024)	78.4	73.7	23.0
	IPO (Azar et al., 2024)	78.2	72.9	23.2
	KTO (Ethayarajh et al., 2024)	77.9	72.5	22.4
	Iterative-DPO (Pang et al., 2024)	78.1	74.8	23.8
Reinforcement Learning	PPO-S (Hu et al., 2024)	78.1	73.8	25.2
	PPO-M (cf. Shao et al., 2024)	80.2	75.0	29.8
	PF-PPO (BoN)	75.8	71.7	16.8
	PF-PPO (BR)	82.9	75.9	33.0
	PF-PPO (BW)	82.4	76.2	30.4
SOTA (7B models)	Magicoder (Wei et al., 2023)	76.8	75.7
