# Supplementary material
Source: ML conference proceedings conference paper supplement (https://openreview.net/forum?id=xg0fmtqh8d)
Supplement: supplementary_material [file 555_TS-Align_ A Teacher-Student Collaborative Framework for Scalable Iterative Finetuning of Large Language Models.xlsx]

## Sheet: Sheet
	Alpaca-Eval			IFEval
Pairwise (%)	Win	Tie	Loss	Win	Tie	Loss
Iter1 vs SFT	61.50	3.50	35.00	56.50	2.00	41.50
Iter2 vs SFT	70.00	3.00	27.00	63.00	1.00	36.00
