# Supplementary material
Source: ML conference proceedings conference paper supplement (https://openreview.net/forum?id=xg0fmtqh8d)
Supplement: supplementary_material [file 556_Aligning Large Language Models to a Domain-specific Graph Database for NL2GQL.xlsx]

## Sheet: Sheet
Domain	Model	EM	EX
Medical domain	HuatuoGPT2-7B	0.059	0.059
	BianQue-2	0.18	0.18
General domain	Chatglm3-6B	16.10	17.75
	Qwen-14B-Chat	21.10	22.75
