# Supplementary material
Source: ML conference proceedings conference paper supplement (https://openreview.net/forum?id=xg0fmtqh8d)
Supplement: supplementary_material [file 557_What Would You Ask When You First Saw $a^2+b^2=c^2$_ Evaluating LLM on Curiosity-Driven Questioning.xlsx]

## Sheet: Sheet
	Relevance		Coherence		Diversity
Dataset	Highest	Lowest	Highest	Lowest	Highest	Lowest
Physics
- Basic	GPT-4	Llama2-7b	Phi-2	Llama2-70b	GPT-4	Llama2-7b
- Intermediate	GPT-4	Gemini	GPT-4	Llama2-7b	Phi-2	Gemini
- Advanced	GPT-4	Llama2-70b	GPT-4	Llama2-7b	Gemini	Llama2-7b
- Wrong	GPT-3.5	Mistral 8x7b	GPT-3.5	Llama2-70b	GPT-3.5	GPT-4
Chemistry
- Basic	GPT-4	Llama2-7b	GPT-4	Llama2-7b	Mistral 8x7b	Llama2-7b
- Intermediate	GPT-4	Llama2-7b	Mistral 8x7b	Llama2-7b	Mistral 8x7b	Llama2-70b
- Advanced	Mistral 8x7b	Llama2-7b	GPT-4	Llama2-7b	Mistral 8x7b	Llama2-70b
- Wrong	Gemini	Llama2-7b	Gemini	Phi-2	Gemini	Phi-2
Maths
- Basic	Phi-2	Llama2-7b	Phi-2	Llama2-7b	GPT-4	GPT-3.5
- Intermediate	Mistral 8x7b	Llama2-7b	GPT-4	Llama2-7b	GPT-4	Gemini
- Advanced	GPT-4	Llama2-7b	GPT-4	Llama2-7b	Mistral 8x7b	Llama2-7b
- Wrong	Mistral 8x7b	Llama2-13b	Phi-2	GPT-3.5	GPT-4	Gemini
General	GPT-4	Llama2-7b	GPT-4	Llama2-7b	GPT-4	Llama2-7b
