# Supplementary material
Source: ML conference proceedings conference paper supplement (https://openreview.net/forum?id=xg0fmtqh8d)
Supplement: supplementary_material [file 558_Self-Instructed Derived Prompt Generation Meets In-Context Learning_ Unlocking New Potential of Black-Box LLMs.xlsx]

## Sheet: Sheet
	Method		Vicuna Eval			Self-Instruct
	A	B	A Win	B Win	Tie	A Win	B Win	Tie
#1	OD	OP	78.8	11.2	10.0	66.3	15.5	18.2
#2	BPO	OP	68.8	15.0	16.2	66.3	21.4	12.3
#3	OD	BPO	72.5	21.3	6.2	42.1	8.7	49.2
#4	BPO	OP	68.8	15.0	16.2	66.3	21.4	12.3
#5	BPO + ICL	OP	76.3	11.3	12.4	69.4	21.4	9.2
#6	BPO + ICL	BPO	68.8	2.5	28.7	71.1	19.4	9.5
#7	OD + ICL	OD	60.0	2.5	37.5	52.4	9.1	37.3
#8	BPO + ICL	BPO	68.8	2.5	28.7	71.1	19.4	9.5
#9	OD + ICL	BPO + ICL	75.0	11.3	13.7	68.9	21.4	10.7
