# Supplementary material
Source: ML conference proceedings conference paper supplement (https://openreview.net/forum?id=xg0fmtqh8d)
Supplement: supplementary_material [file 559_Anchored Preference Optimization and Contrastive Revisions_ Addressing Underspecification in Alignment.xlsx]

## Sheet: Sheet
Dataset	Objective	ME-Hard 2024-06-01		ME-Hard 2024-08-11		LC-AlpacaEval2.0
		Max ∆	Mean ∆	Max ∆	Mean ∆	Score ∆	Length ∆
Judge off-policy	DPO	1.10	−0.74 (1.15)	4.30	2.85 (0.75)	2.94	−158
	KTO-pair	−1.00	−2.89 (0.96)	4.05	1.18 (1.67)	−5.69	−437
	SFT	−1.95	−1.63 (1.06)	2.85	0.42 (1.20)	−22.29	12669
	APO-zero	0.80	−1.99 (1.23)	4.65	1.26 (1.62)	−2.42	−395
	APO-down	2.70	0.64 (0.98)	4.80	3.52 (0.85)	2.40	−203
Judge on-policy	DPO	4.00	0.56 (1.61)	5.20	2.71 (1.41)	4.98	341
	KTO-pair	2.45	−0.51 (1.26)	5.05	1.13 (1.70)	3.02	452
	SFT	0.65	−0.91 (1.01)	4.20	2.55 (0.70)	1.34	156
	APO-zero	4.65	0.02 (1.66)	5.35	2.19 (1.28)	5.51	484
	APO-down	3.65	1.60 (0.95)	4.25	3.06 (0.76)	7.63	386
CLAIR	DPO	0.55	−1.68 (1.73)	5.05	2.77 (1.40)	2.65	966
	KTO-pair	2.15	0.79 (0.98)	4.65	2.92 (0.86)	4.33	160
	SFT	0.65	−0.91 (1.01)	2.70	0.92 (1.21)	−0.47	6108
	APO-zero	7.65	2.93 (1.98)	5.95	4.39 (0.89)	5.08	520
	APO-down	−1.05	−5.22 (1.55)	−1.20	−3.61 (1.05)	−6.30	2559
Stronger Preferred	DPO	−5.00	−6.94 (1.03)	−3.10	−4.40 (0.98)	−2.89	597
	KTO-pair	−1.20	−5.21 (1.27)	2.25	0.50 (1.13)	0.71	153
	SFT	2.45	0.49 (1.31)	5.05	2.73 (1.21)	6.99	1883
	APO-zero	−1.70	−2.72 (1.40)	−4.85	−12.02 (5.38)	0.89	243
	APO-down	−6.50	−12.51 (4.97)	1.65	0.16 (1.22)	1.87	10001
