# Supplementary material
Source: ML conference proceedings conference paper supplement (https://openreview.net/forum?id=xg0fmtqh8d)
Supplement: supplementary_material [file 560_Evaluating Gender, Racial, and Age Biases in Large Language Models_ A Comparative Analysis of Occupational and Crime Scenarios.xlsx]

## Sheet: Sheet
	Gemini 1.5 Pro	Claude 3 Opus	GPT-4o	Llama3 70b
Occupational Gender Bias [US BLS]	38.87	33.32	36.75	38.87
Crime – Gender Bias [US FBI]	67.11	56.57	22.05	71.87
Crime – Racial Bias [US FBI]	45.31	18.92	23.54	24.12
Crime – Age Bias [US FBI]	10.64	30.59	12.36	13.46
