# Supplementary material
Source: ML conference proceedings conference paper supplement (https://openreview.net/forum?id=xg0fmtqh8d)
Supplement: supplementary_material [file 561_Enhancing Tourism Recommender Systems for Sustainable City Trips Using Retrieval-Augmented Generation.xlsx]

## Sheet: Sheet
Models	Method	Evaluation Metrics
		Relevance		Sustainability (%)		Faithfulness (%)
		GPT-4o-mini	Claude-3-5-sonnet	Accuracy	Frequency
Llama-3.1-Instruct-8B	Baseline	8.16±1.78	6.29±2.27	-	-	0
	SAR	7.69±1.73	5.50±2.29	10.5	42.5	0
Mistral-Instruct-7B	Baseline	3.85±2.72	3.05±2.45	-	-	14.0
	SAR	3.96±2.65	2.97±2.35	7.5	36.5	9.5
