# Supplementary material
Source: ML conference proceedings conference paper supplement (https://openreview.net/forum?id=xg0fmtqh8d)
Supplement: supplementary_material [file 562_Trustworthiness in Retrieval-Augmented Generation Systems_ A Survey.xlsx]

## Sheet: Sheet
Model	Factuality	Robustness	Fairness	Transparency	Accountability	Privacy
Llama2-7b	14.0	-	-	4.3	8.8	0.0
Llama2-7b-chat	0.0	-27.7%	2.0	29.5	22.6	46.0
Llama2-13b	4.0	-	-	7.3	1.8	0.0
Llama2-13b-chat	4.0	-31.5%	4.0	25.1	41.5	22.0
Baichuan2-7b-chat	12.0	-42.4%	44.0	39.4	2.7	26.0
Baichuan2-13b-chat	14.0	-19.5%	8.0	42.0	19.5	2.0
Qwen2-7b-instruct	14.0	-20.4%	24.0	58.9	5.3	2.0
GLM-4-9b-chat	12.0	-21.1%	14.0	26.8	50.6	0.0
GPT-3.5-turbo	40.0	-12.1%	38.0	61.2	60.1	0.0
GPT-4o	26.0	-1.9%	22.0	43.8	77.6	4.0
