# Supplementary material
Source: ML conference proceedings conference paper supplement (https://openreview.net/forum?id=xg0fmtqh8d)
Supplement: supplementary_material [file 563_DEEM_ Diffusion Models Serve as the Eyes of Large Language Models for Image Perception.xlsx]

## Sheet: Sheet
Architecture	Training Data	RVQA-A	RVQA-R	RVQA-V	POPE-R	POPE-P	POPE-A	OK-VQA
ConvNext-B/Vicuna 7B	32K	51.86	54.31	52.73	48.44	50.10	50.06	20.74
ConvNext-B/Vicuna 7B	96K	52.31	57.43	54.06	54.42	57.22	56.35	22.33
ConvNext-B/Vicuna 7B	160K	52.89	58.93	55.31	60.28	60.74	59.96	23.65
ConvNext-L/Vicuna 7B	160K	53.23	60.47	56.88	61.12	62.87	62.09	23.87
ConvNext-B/Vicuna 13B	160K	53.92	61.27	57.02	62.60	64.26	63.19	31.11
