# Supplementary material
Source: ML conference proceedings conference paper supplement (https://openreview.net/forum?id=xg0fmtqh8d)
Supplement: supplementary_material [file 564_Assessing SPARQL capabilities of Large Language Models.xlsx]

## Sheet: Sheet
task type	dataset subset	task	KG Info type	KG info format
SSF	Syntax-Errors	SSF-LC-QuAD	not needed here	not needed here
S2A	Organizational	S2A-Orga	full KG	Turtle or JSON-LD
T2S	LC-QuAD 2.0	T2S-LC-QuAD	IRIs + Labels	table
	Organizational	T2S-Orga	full KG	Turtle
	Organizational-Numeric	T2S-OrgaNum	full KG + IRIs + Labels	Turtle + table
	Beastiary	T2S-Beast-Graph	KG subset	Turtle
		T2S-Beast-Schema	schema	Turtle
		T2S-Beast-Subschema	schema subset	Turtle
		T2S-Beast-Iris	IRIs	list
	CoyPu-Mini	T2S-CoyPu-Graph	full KG	Turtle or JSON-LD
		T2S-Coypu-Schema	schema	Turtle or JSON-LD
		T2S-Coypu-Iris	IRIs	list
T2A	Organizational	T2A-Orga	full KG	Turtle or JSON-LD
