# Supplementary material
Source: ML conference proceedings conference paper supplement (https://openreview.net/forum?id=xg0fmtqh8d)
Supplement: supplementary_material [file 565_Attention Prompting on Image for Large Vision-Language Models.xlsx]

## Sheet: Sheet
Inference Model	Prompting Method	Dataset
		VisWiz	TextVQA	MMMU	MM-Vet	MME	LLaVA-Bench
LLaVA	w/o prompt	60.93	48.32	35.15	32.8	85.5	71.9
	+Step-by-Step	60.98 (+0.1)	48.22 (−0.1)	35.40 (+0.3)	33.7 (+0.9)	84.2 (−1.3)	73.5 (+1.6)
	FGVP (Mask)	56.89 (−4.0)	39.38 (<- 5)	36.14 (+1.0)	31.0 (−1.8)	75.8 (<- 5)	57.4 (<- 5)
	FGVP (RBM)	61.22 (+0.3)	33.91 (<- 5)	35.00 (−0.2)	25.0 (<- 5)	81.4 (−4.1)	57.4 (<- 5)
	SoM	54.16 (<- 5)	18.81 (<- 5)	35.57 (+0.4)	26.4 (<- 5)	75.4 (<- 5)	56.1 (<- 5)
	Ours (CLIP)	61.26 (+0.3)	48.78 (+0.5)	37.52 (+2.4)	35.3 (+2.5)	87.2 (+1.7)	74.1 (+2.2)
	Ours (LLaVA)	61.35 (+0.4)	48.79 (+0.5)	36.95 (+1.8)	36.6 (+3.8)	86.3 (+0.8)	74.8 (+2.9)
CogVLM	w/o prompt	53.54	78.41	36.43	49.6	81.8	50.8
	+Step-by-Step	28.86 (<- 5)	42.53 (<- 5)	29.19 (<- 5)	48.0 (−1.6)	63.0 (<- 5)	40.7 (<- 5)
	FGVP (Mask)	53.55 (+0.0)	63.69 (<- 5)	35.34 (−1.1)	44.1 (<- 5)	80.4 (−1.4)	49.1 (−1.7)
	FGVP (RBM)	53.68 (+0.1)	65.51 (<- 5)	36.55 (+0.1)	48.2 (−1.4)	82.0 (+0.2)	48.1 (−2.7)
	SoM	51.00 (−2.5)	36.64 (<- 5)	35.55 (−0.9)	31.2 (<- 5)	78.0 (−3.8)	38.9 (<- 5)
	Ours (CLIP)	54.01 (+0.5)	78.99 (+0.6)	37.05 (+0.6)	52.5 (+2.9)	82.3 (+0.5)	53.3 (+2.5)
	Ours (LLaVA)	54.34 (+0.8)	78.85 (+0.4)	36.95 (+0.5)	52.0 (+2.4)	82.7 (+0.9)	52.4 (+1.6)
GPT-4V (1106)	w/o prompt	59.40	50.60	50.55	67.00	84.3	102.0
	+Step-by-Step	55.75 (−3.6)	49.85 (−0.7)	48.33 (−2.2)	62.50 (−4.5)	82.0 (−2.3)	102.6 (+0.6)
	FGVP (Mask)	69.30 (+9.9)	45.95 (−4.6)	43.88 (<−5)	61.00 (<−5)	65.0 (<- 5)	59.2 (<- 5)
	FGVP (RBM)	69.40 (+10.0)	46.15 (−4.4)	52.50 (+1.9)	60.20 (<−5)	79.6 (−4.7)	92.5 (<- 5)
	SoM	65.30 (+5.9)	45.00 (<−5)	48.33 (−2.22)	58.90 (<−5)	65.8 (<- 5)	56.1 (<- 5)
	Ours (CLIP)	69.50 (+10.1)	51.50 (+0.9)	50.96 (+0.4)	67.70 (+0.7)	85.3 (+1.0)	103.3 (+1.3)
	Ours (LLaVA)	71.01 (+11.6)	50.80 (+0.2)	51.38 (+0.8)	67.10 (+0.1)	84.7 (+0.3)	103.6 (+1.6)
Gemini	w/o prompt	50.28	56.68	35.11	59.0	78.6	81.5
	+Step-by-Step	22.82 (<- 5)	21.51 (<- 5)	36.37 (+1.3)	30.6 (<- 5)	29.8 (<- 5)	40.5 (<- 5)
	FGVP (Mask)	52.88 (+2.6)	40.81 (<- 5)	34.88 (−0.2)	45.8 (<- 5)	71.0 (<- 5)	64.2 (<- 5)
	FGVP (RBM)	53.01 (+2.7)	45.67 (<- 5)	34.08 (−1.0)	52.0 (<- 5)	77.4 (−1.2)	82.3 (+0.8)
	SoM	51.25 (+1.0)	27.29 (<- 5)	34.77 (−0.3)	34.4 (<- 5)	69.8 (<- 5)	64.5 (<- 5)
	Ours (CLIP)	58.58 (+8.3)	59.07 (+2.4)	37.71 (+2.6)	60.5 (+1.5)	80.2 (+1.6)	85.2 (+3.7)
	Ours (LLaVA)	58.17 (+7.9)	58.35 (+1.7)	38.16 (+3.1)	60.1 (+1.1)	80.0 (+1.4)	82.3 (+0.8)
