# Supplementary material
Source: ML conference proceedings conference paper supplement (https://openreview.net/forum?id=xg0fmtqh8d)
Supplement: supplementary_material [file 566_Behavioral Bias of Vision-Language Models_ A Behavioral Finance View.xlsx]

## Sheet: Sheet
Model Name	Recency Bias		Authority Bias
	Accuracy(%)	Bias Index(%)	Accuracy(%)	Bias Index(%)
LLaVA-NeXT Mistral 7B	57.0±4.1	6.4±7.5	55.6±6.5	14.5±5.3
MobileVLM V2 7B	51.2±5.5	27.3±7.7	51.0±2.1	39.6±12.5
Mini-Gemini 7B HD	54.8±3.3	30.2±5.9	56.0±6.8	14.6±6.7
MiniCPM-Llama3-V 2.5	56.0±3.8	12.5±6.9	50.8±5.5	55.6±9.4
Phi-3-vision-128k-instruct	57.6±4.3	18.7±8.2	48.2±4.7	23.5±8.0
GPT-4o	58.4±5.2	1.9±1.6	58.2±6.7	1.4±1.8
