# Supplementary material
Source: ML conference proceedings conference paper supplement (https://openreview.net/forum?id=xg0fmtqh8d)
Supplement: supplementary_material [file 567_MedPromptExtract (Medical Data Extraction Tool)_ Anonymization and Hi-fidelity Automated data extraction using NLP and prompt engineering.xlsx]

## Sheet: Sheet
Feature	Acc.	Sen.	Spec.	Pre.	F1	AUC
AKI Mentioned	0.96	0.5	1	1	0.67	0.75
Angiography Done	0.98	1	0.98	0.86	0.92	0.98
Consultation by Nephrologist	0.81	0.12	0.95	0.33	0.18	0.53
Diuretic Given	0.98	1	0.97	0.92	0.96	0.98
Fluid Restriction Advised	0.98	1	0.98	0.67	0.8	0.98
General Anaesthesia	0.81	0.65	0.9	0.79	0.71	0.77
Hypertension	0.98	1	0.98	0.75	0.86	0.98
ICU Admission	0.71	0.5	0.95	0.93	0.65	0.72
Imaging Procedure with Contrast	0.94	0.88	0.95	0.78	0.83	0.9
Oxygen Saturation Drop	0.96	0.5	1	1	0.67	0.75
Tachycardia	1	1	1	1	1	1
Ventilator Used	0.98	1	0.98	0.8	0.89	0.98
Note: Acc. = Accuracy, Sen. = Sensitivity, Spec. = Specificity, Pre. = Precision, F1 = F1 Score, AUC = Area Under the Curve
