# Supplementary material
Source: ML conference proceedings conference paper supplement (https://openreview.net/forum?id=xg0fmtqh8d)
Supplement: supplementary_material [file 568_PALLM_ Evaluating and Enhancing PALLiative Care Conversations with Large Language Models.xlsx]

## Sheet: Sheet
Method	Training sample	Script	Balanced Accuracy (%)
			Understanding	Empathy	Emotion	Presence	Clarity
Standard	1000	Good	54.24	55.21	58.67	54.17	63.48
		Bad	-	-	67.01	71.33	52.96
	2000	Good	55.00	51.26	65.31	55.88	53.85
		Bad	-	-	79.86	78.37	60.28
	3000	Good	56.82	66.35	74.52	67.92	74.02
		Bad	-	-	79.86	78.37	60.28
CoT	1000	Good	61.61	52.47	52.29	62.62	58.22
		Bad	-	-	65.28	71.33	70.95
	2000	Good	65.61	69.71	73.12	56.94	83.92
		Bad	-	-	73.96	67.33	86.76
	3000	Good	68.48	71.79	81.12	79.79	87.76
		Bad	-	-	80.56	82.21	82.02
SC-CoT	1000	Good	60.14	52.47	48.96	62.62	58.22
		Bad	-	-	65.28	76.89	70.95
	2000	Good	68.64	70.51	77.29	59.21	84.88
		Bad	-	-	71.88	52.67	79.64
	3000	Good	70.15	74.84	84.69	85.21	87.76
		Bad	-	-	80.56	82.21	82.02
