# Supplementary material
Source: ML conference proceedings conference paper supplement (https://openreview.net/forum?id=xg0fmtqh8d)
Supplement: supplementary_material [file 569_Defending against Reverse Preference Attacks is Difficult.xlsx]

## Sheet: Sheet
Attack	Dataset	Defence	2.5k	5k	10k
DPO	BeaverTails	Lisa	0.18	0.19	0.11
		RepNoise	0.56	0.55	0.33
		RepNoise →TAR	0.21	0.40	0.01
		Refusal	0.06	0.07	0.07
	Safe RLHF	Lisa	0.05	0.05	0.06
		RepNoise	0.86	0.86	0.86
		RepNoise →TAR	0.93	0.67	0.88
		Refusal	0.06	0.05	0.06
PPO	BeaverTails	Lisa	0.08	0.07	0.13
		RepNoise	–	–	–
		RepNoise →TAR	0.44	0.00	0.22
		Refusal	0.07	0.14	0.60
	Safe RLHF	Lisa	0.08	0.06	0.06
		RepNoise	0.48	–	–
		RepNoise →TAR	–	–	0.51
		Refusal	0.06	0.06	0.09
SFT	BeaverTails	Lisa	0.31	0.60	0.61
		RepNoise	0.33	0.43	0.43
		RepNoise →TAR	0.18	0.29	0.31
		Refusal	0.07	0.10	0.12
	Safe RLHF	Lisa	0.16	0.44	0.28
		RepNoise	0.39	0.50	0.50
		RepNoise →TAR	0.52	0.58	0.60
		Refusal	0.07	0.10	0.09
