# Supplementary material
Source: ML conference proceedings conference paper supplement (https://openreview.net/forum?id=xg0fmtqh8d)
Supplement: supplementary_material [file 570_The Fine Line_ Navigating Large Language Model Pretraining with Down-streaming Capability Analysis.xlsx]

## Sheet: Sheet
Dataset	200B	400B	600B	800B	1000B	1200B	1400B	1600B	1800B	2000B
——- MMLU details ——-	-	-	-	-	-	-	-	-	-	-
mmlu-humanities	38.08	59.46	65.73	68.31	70.17	70.23	72.01	74.2	74.6	77.11
mmlu-stem	32.17	46.19	47.95	50.8	50.64	54.35	53.76	57.02	58.64	60.55
mmlu-social-science	40.87	64.11	69.91	72.63	73.26	74.23	76.28	77.05	79.71	81.67
mmlu-other	39.84	58.83	63.18	64.76	65.99	67.44	67.85	70.49	72.42	74.38
mmlu	37.1	55.87	60.1	63.57	63.36	65.14	65.88	68.23	69.86	71.93
—- Standard Benchmarks —	-	-	-	-	-	-	-	-	-	-
BoolQ	72.69	78.29	82.35	83.67	84.04	85.63	86.27	86.54	87.4	88.23
piqa	78.73	78.94	79.92	81.39	81.07	80.96	80.9	81.77	82.37	82.64
siqa	37.15	52.15	57.32	51.89	58.5	61.21	59.88	62.38	61.72	62.79
hellaswag	71.28	75.72	77.65	78.25	78.35	78.71	79.19	80.19	81.15	82.29
winogrande	64.8	68.9	70.56	72.69	72.14	72.77	74.98	73.16	75.37	76.01
ARC-e	33.33	70.19	83.25	83.77	88.01	88.71	89.95	90.48	93.83	93.65
ARC-c	26.44	51.19	68.81	69.83	74.92	74.24	77.63	80	84.07	86.44
openbookqa fact	31	61	74	69.4	79.6	73.8	75.6	80.4	80.8	81
commonsense qa	67.65	67.24	81.5	72.48	68.39	68.3	70.19	70.68	75.43	74.45
mmlu	37.1	55.87	60.1	62.57	63.36	65.14	65.88	68.23	69.86	71.93
—— Code Generation —–	-	-	-	-	-	-	-	-	-	-
openai humaneval	17.07	23.78	27.44	27.44	30.49	32.32	25.61	35.37	37.8	39.63
mbpp	25.2	36.2	40.6	42.2	41.2	45.2	48	50	53.4	55.4
—— World Knowledge —–	-	-	-	-	-	-	-	-	-	-
nq	15.43	21.14	20.94	21.69	25.6	25.18	27.26	24.9	26.9	29.94
triviaqa	43.61	55.37	55.29	59.68	58.69	60.45	61.56	62.87	64.84	67.39
— Reading Comprehension –	-	-	-	-	-	-	-	-	-	-
squad2.0	40.39	43.58	46.77	44.5	42.34	49.15	48.43	51.69	57.64	57.02
———- Math ———–	-	-	-	-	-	-	-	-	-	-
math	2.28	4.78	7.06	7.88	8.5	9.34	10.66	11.24	14.42	15.9
gsm8k	9.17	25.55	37.6	44.58	49.51	49.81	54.59	57.01	61.56	66.57
TheoremQA	1	1.75	1.38	2.25	2.25	3.38	2.12	3.12	2.5	2.62
——— Chinese ———-	-	-	-	-	-	-	-	-	-	-
ceval	36.52	50.03	54.45	57.94	56.93	60.78	60.78	62.39	64.89	66.95
ceval-stem	30.89	42.38	44.05	49.04	46.91	50.34	51.37	50.02	52.03	56.93
ceval-social-science	41.85	61	64.68	67.94	70.86	75.7	72.15	74.67	79.43	79.56
ceval-humanities	37.91	55.93	65.1	63.29	63.97	68.34	67.3	73.11	73.76	74.09
ceval-other	40.53	48.07	53.41	59.68	55.44	58.66	61.02	62.98	66.19	66.57
ceval-hard	25.64	32.31	32.66	34.71	35.39	35.62	38.3	35.38	35.88	39.32
cmmlu	32.94	52.35	58.3	60.6	62.3	62.95	64.75	66.46	68.91	70.44
cmmlu-humanities	34.9	56.88	63.84	67.72	69.79	70.11	72.53	73.97	76.95	78.52
cmmlu-stem	29.13	40.43	44.38	45.35	47.81	48.01	49.38	52.61	54.17	56.61
cmmlu-social-science	33.64	56.83	63.45	65.56	66.85	67.61	69.44	70.59	73.49	73.95
cmmlu-other	34.51	55.37	61.7	64.45	65.56	66.84	68.53	69.58	71.94	73.94
cmmlu-china-specific	32.69	52.14	58.98	61.57	62.54	63.55	65.32	66.58	70.23	71.73
