# Supplementary material
Source: ML conference proceedings conference paper supplement (https://openreview.net/forum?id=xg0fmtqh8d)
Supplement: supplementary_material [file 571_Towards Safer Online Spaces_ Simulating and Assessing Intervention Strategies for Eating Disorder Discussions.xlsx]

## Sheet: Sheet
Community	Med(snone)	Med(s)diff	max(Med(s)diff)	min(Med(s)diff)
Twitter, keto recipes	0.613	0.093	0.173, support	- 0.054, reset insight
Twitter, EDTwitter	0.613	0.121	0.164, modeling civility	-0.022, health advice
Reddit, comments	0.510	0.141	0.281, modeling civility	-0.069, support
Reddit, eat X cal	0.608	-0.109	0.049, support	-0.485, reset insight
ED Forum, ED exp	0.803	-0.015	-0.031, reset insight	-0.092, health advice
ED Forum, transition	0.434	0.151	0.320, informing banned	0.073, reset insight
