# Supplementary material
Source: ML conference proceedings conference paper supplement (https://openreview.net/forum?id=xg0fmtqh8d)
Supplement: supplementary_material [file 572_ReMEmbR_ Building and Reasoning Over Long-Horizon Spatio-Temporal Memory for Robot Navigation.xlsx]

## Sheet: Sheet
LLMs	Overall Correctness ↑
	Short	Medium	Long
ReMEmbR	0.72±0.5	0.56±0.5	0.61±0.5
- 1 call only	0.67±0.5	0.48±0.4	0.50±0.5
- 12-sec captions	0.54±0.5	0.50±0.5	0.38±0.5
- Llama-VILA1.5-8b	0.58 ±0.5	0.52 ±0.5	0.54±0.5
- VILA1.5-3b	0.60±0.5	0.58±0.5	0.50±0.5
