# Supplementary material
Source: ML conference proceedings conference paper supplement (https://openreview.net/forum?id=xg0fmtqh8d)
Supplement: supplementary_material [file 573_Outlining the Borders for LLM Applications in Patient Education_ Developing an Expert-in-the-Loop LLM-Powered Chatbot for Prostate Cancer Patient Education.xlsx]

## Sheet: Sheet
Patient Participant ID	Age	Education Level	Race/Ethnicity	Prostate Cancer Stage
P1	84	Ph.D.	White	IIB stage
P2	80	M.S.	White	III stage
P3	67	M.S.	White	II stage
P4	68	Ph.D.	White	III stage
P5	71	M.S.	Asian	III stage
P6	76	Ph.D.	White	II stage
P7	68	D.D.S.	White	IV stage
