# Supplementary material
Source: ML conference proceedings conference paper supplement (https://openreview.net/forum?id=xg0fmtqh8d)
Supplement: supplementary_material [file 574_Turn Every Application into an Agent_ Towards Efficient Human-Agent-Computer Interaction with API-First LLM-Based Agents.xlsx]

## Sheet: Sheet
Metric	Task Level	Manual	Agents	Pairwise Significance
Mental Demand (0-100)	L1	21.3	2.5	L1: m>a (p < 0.001)
	L2	70.0	7.5	L2: m>a (p < 0.001)
Physical Demand (0-100)	L1	31.3	5.0	L1: m>a (p < 0.001)
	L2	57.5	6.3	L2: m>a (p < 0.001)
Temporal Demand (0-100)	L1	52.5	28.8	L1: m>a (p < 0.05)
	L2	37.5	35.0	L2: -
Performance (0-100)	L1	21.2	21.2	L1: -
	L2	47.5	26.2	L2: m>a (p < 0.05)
Frustration Level (0-100)	L1	31.3	7.5	L1: m>a (p < 0.001)
	L2	62.5	10.0	L2: m>a (p < 0.001)
Completion Effort (0-100)	L1	12.5	17.5	L1: -
	L2	35.0	13.8	L2: m>a (p < 0.01)
