# Supplementary material
Source: ML conference proceedings conference paper supplement (https://openreview.net/forum?id=xg0fmtqh8d)
Supplement: supplementary_material [file 575_LLM Detectors Still Fall Short of Real World_ Case of LLM-Generated Short News-Like Posts.xlsx]

## Sheet: Sheet
Generator type	Generator	Full Dataset size
Complete models	Phi-2	19918 samples (9960 True/9958 False)
	Gemma-2B	19783 samples (9891 True/9892 False)
	Mistral	19719 samples (9860 True/9859 False
	Phi-2/Gemma-2B/Mistral	8325 samples (4164 True/4161 Fake)
Chat models	LLama-3-8B-Instruct	19917 samples (9960 True/9957 Fake)
	Gemma-chat	19917 samples (9960 True/9957 False)
	Zephyr	17691 samples (8846 True/8845 False)
