# Supplementary material
Source: ML conference proceedings conference paper supplement (https://openreview.net/forum?id=xg0fmtqh8d)
Supplement: supplementary_material [file 576_Incorporate LLMs with Influential Recommender System.xlsx]

## Sheet: Sheet
Method	Acceptability			Coherence
	GPT-3.5	GPT-4	Gemini	OpenAI	GPT-4
GPT-3.5	0.65	0.63	0.64	0.08	0.65
GPT-CoT	0.73	0.75	0.58	0.11	0.70
GPT-ToT	0.84	0.77	0.55	0.19	0.81
