# Supplementary material
Source: ML conference proceedings conference paper supplement (https://openreview.net/forum?id=xg0fmtqh8d)
Supplement: supplementary_material [file 577_Defending against Reverse Preference Attacks is Difficult.xlsx]

## Sheet: Sheet
Attack	Dataset	Defence	Harmfulness ↓	PPL ↓	KL ↓	Helpfulness ↑
DPO	BeaverTails	Lisa	0.13	14.95	41.28	0.23
		Refusal Loss	0.05	18.02	2725.48	0.20
		Security Vectors	0.72	23.66	207.07	0.58
		Vaccine	0.00	162.19	984.74	-2.43
	Safe RLHF	Lisa	0.07	14.22	50.47	0.25
		Refusal Loss	0.39	15.51	3003.56	0.62
		Security Vectors	0.84	16.23	160.34	0.55
		Vaccine	0.00	240.35	975.49	-2.36
PPO	BeaverTails	Lisa	0.08	14.70	108.52	0.18
		Refusal Loss	0.06	17.34	2521.85	0.17
		Safe RLHF	0.63	17.44	420.08	0.29
		Security Vectors	0.13	19.19	368.35	0.13
		Vaccine	–	–	–	–
	Safe RLHF	Lisa	0.07	14.63	139.37	0.19
		Refusal Loss	0.09	24.94	200.11	-0.20
		Safe RLHF	0.25	18.68	236.30	-0.02
		Security Vectors	0.13	34.40	188.73	-0.78
		Vaccine	–	–	–	–
SFT	BeaverTails	Lisa	0.21	16.73	5.44	-0.11
		Refusal Loss	0.07	13.75	45.15	0.25
		Security Vectors	0.07	17.43	1.35	-0.00
		Vaccine	0.17	15.33	16.84	0.15
	Safe RLHF	Lisa	0.15	17.61	5.84	-0.04
		Refusal Loss	0.26	15.22	1520.27	0.47
		Security Vectors	0.06	18.13	1.58	0.07
		Vaccine	0.27	14.15	19.17	-0.33
