# Supplementary material
Source: ML conference proceedings conference paper supplement (https://openreview.net/forum?id=xg0fmtqh8d)
Supplement: supplementary_material [file 578_Towards an Understanding of Large Language Models in Software Engineering Tasks.xlsx]

## Sheet: Sheet
Tasks	Numbers of Paper	Note
Code Generation	13	Includes code improvements
Q&A Interaction	5	/
Code Translation	1	/
Code Summarization	4	Includes code comprehension
Code Evaluation	3	Includes code clone
Vulnerability Detection	9	Included Tests
Code Management	4	Includes logs
Other Works	1	/
Total	40	/
