# Supplementary material
Source: ML conference proceedings conference paper supplement (https://openreview.net/forum?id=xg0fmtqh8d)
Supplement: supplementary_material [file 579_Code Vulnerability Detection_ A Comparative Analysis of Emerging Large Language Models.xlsx]

## Sheet: Sheet
Model	Dataset	Accuracy	Precision	Recall	F1 Score
Code Llama	Diversvul	60%	32%	14%	20%
LLAMA2	Diversvul	65%	36%	17%	25%
GEMMA	Diversvul	63%	65%	23%	33%
Code Gemma	Diversvul	44%	43%	87%	58%
GPT-2 Base	Merged Diversvul	91%	46%	25%	33%
CodeBert	Merged Diversvul	90%	39%	36%	37%
CodeGPT	Merged Diversvul	91%	43%	29%	35%
