# Supplementary material
Source: ML conference proceedings conference paper supplement (https://openreview.net/forum?id=xg0fmtqh8d)
Supplement: supplementary_material [file 580_FuzzCoder_ Byte-level Fuzzing Test via Large Language Model.xlsx]

## Sheet: Sheet
Benchmark	Train	Test	Program	Input	Option
NM_ELF	4534	504	nm-new	ELF	-a @@
READ_ELF	4167	464	readelf	ELF	-a @@
OBJDUMP_ELF	4009	446	objdump	ELF	-x -a -d @@
LINT_XML	5442	605	xmllint	XML	–valid –recover @@
MP3GAIN_MP3	1431	150	mp3gain	MP3	@@
IMAGEMAGICK_GIT	6477	720	magick	GIF	identify @@
SPLIT_TIFF	4136	459	tiffsplit	TIFF	@@
TRAN_JPEG	1376	153	jpegtran	JPEG	@@
