# Supplementary material
Source: ML conference proceedings conference paper supplement (https://openreview.net/forum?id=xg0fmtqh8d)
Supplement: supplementary_material [file 581_MLR-Copilot_ Autonomous Machine Learning Research based on Large Language Models Agents.xlsx]

## Sheet: Sheet
Method	Criteria	Baseline LLM	IdeaAgent
Manual	Clarity	3.7	4.3
	Validity	3.8	4.1
	Rigor	3.5	4.2
	Innovativeness	3.1	3.9
	Generalizability	3.6	4.0
Automated	Clarity	2.9	4.4
	Validity	3.2	4.6
	Similarity	0.32	0.16
