# Supplementary material
Source: ML conference proceedings conference paper supplement (https://openreview.net/forum?id=xg0fmtqh8d)
Supplement: supplementary_material [file 582_Exploring Language Model Generalization in Low-Resource Extractive QA.xlsx]

## Sheet: Sheet
Embedding Type	Target Dataset
	COVID-QA	TechQA	DuoRC	CUAD
Common-Term Frequencies (Sparse)	-0.23	-0.27	-0.67	-0.5
TEXT Embedding (Dense)	0.9	0.82	0.92	0.86
TASK Embedding (Dense)	0.77	0.64	0.86	0.63
