# Supplementary material
Source: ML conference proceedings conference paper supplement (https://openreview.net/forum?id=xg0fmtqh8d)
Supplement: supplementary_material [file 583_Full-text Error Correction for Chinese Speech Recognition with Large Language Model.xlsx]

## Sheet: Sheet
	Train	Test
		homogeneous	up-to-date	hard
No. of articles	41,651	5,592	3,987	5,590
No. of segments	441,629	58,920	13,287	48,212
