# Supplementary material
Source: ML conference proceedings conference paper supplement (https://openreview.net/forum?id=xg0fmtqh8d)
Supplement: supplementary_material [file 584_Balancing Performance and Efficiency_ A Multimodal Large Language Model Pruning Method based Image Text Interaction.xlsx]

## Sheet: Sheet
Method	POPE	TextVQA	MME
Visual	86.5 (196)	55.28 (254)	1426.5 (201)
Visual + Text	86.5 (196)	55.26 (254)	1430.5 (201)
