# Supplementary material
Source: ML conference proceedings conference paper supplement (https://openreview.net/forum?id=xg0fmtqh8d)
Supplement: supplementary_material [file 585_AXCEL_ Automated eXplainable Consistency Evaluation using LLMs.xlsx]

## Sheet: Sheet
Type	Metric	SummEval	QAGS-XSUM	QAGS-CNNDM	Average
Textual Similarity	ROUGE-L	11.5	-1.1	32.4	14.3
	MoverScore	15.7	4.4	34.7	18.2
	BERTScore	11.0	0.8	50.5	20.8
	BARTScore	38.2	15.9	68	40.7
NLI	AlignScore	46.6	57.2	73.9	59.2
Prompt Based	G-Eval	59.1	56.4	67.3	60.9
	ChatGPTEval	61.2	47.9	66.9	58.7
	AXCEL	66.4	62.1	70.2	66.2
