# Supplementary material
Source: ML conference proceedings conference paper supplement (https://openreview.net/forum?id=xg0fmtqh8d)
Supplement: supplementary_material [file 586_Do Large Language Models Need a Content Delivery Network_.xlsx]

## Sheet: Sheet
	Modularity	Efficiency
	Time to inject new knowledge	Inference cost ($) per request	Response delay (s) per request
Fine-tuning	10 hours	0.0052	2.63
In-context learning	0	0.0149	10.91
KV-cache learning w/ KDN	0.25 hours	0.0059	2.97
