# Supplementary material
Source: ML conference proceedings conference paper supplement (https://openreview.net/forum?id=xg0fmtqh8d)
Supplement: supplementary_material [file 587_Contrasting Linguistic Patterns in Human and LLM-Generated News Text.xlsx]

## Sheet: Sheet
l	Model	%L	%R	̄ l	̄ lL	̄ lR	𝜎l	𝜎lL	𝜎lR	# Sent
1–10	Human	49.40	50.60	2.37	2.89	1.84	1.67	1.90	1.17	4 719
	M7B	50.94	49.06	2.37	2.93	1.83	1.65	1.88	1.16	6 190
	F7B	52.08	47.92	2.39	2.99	1.84	1.62	1.84	1.15	4 596
	LL7B	50.68	49.32	2.37	2.95	1.81	1.65	1.88	1.14	6 114
	LL13B	50.42	49.58	2.37	2.94	1.81	1.65	1.88	1.14	6 711
	LL30B	49.97	50.03	2.37	2.92	1.81	1.65	1.89	1.14	6 808
	LL65B	50.23	49.77	2.36	2.91	1.81	1.64	1.87	1.15	6 652
11–20	Human	58.36	41.64	3.19	4.62	2.17	3.12	3.87	1.86	6 179
	M7B	59.76	40.24	3.12	4.63	2.10	3.03	3.80	1.74	12 113
	F7B	61.41	38.59	3.20	4.79	2.19	3.06	3.85	1.83	9 265
	LL7B	59.74	40.26	3.11	4.63	2.09	3.03	3.81	1.72	12 361
	LL13B	59.69	40.31	3.12	4.63	2.11	3.03	3.81	1.75	12 762
	LL30B	59.62	40.38	3.12	4.63	2.11	3.03	3.80	1.76	13 039
	LL65B	59.43	40.57	3.13	4.63	2.10	3.04	3.81	1.75	12 767
21–30	Human	60.40	39.60	3.64	5.52	2.41	4.42	5.71	2.68	6 153
	M7B	61.00	39.00	3.53	5.50	2.26	4.28	5.65	2.33	10 449
	F7B	62.51	37.49	3.62	5.70	2.38	4.32	5.72	2.46	8 222
	LL7B	60.87	39.13	3.51	5.47	2.25	4.26	5.64	2.30	11 014
	LL13B	60.86	39.14	3.53	5.49	2.27	4.27	5.64	2.34	11 017
	LL30B	60.71	39.29	3.53	5.48	2.27	4.26	5.61	2.34	10 810
	LL65B	60.47	39.53	3.53	5.47	2.26	4.28	5.63	2.35	10 884
31–40	Human	60.84	39.16	3.90	6.07	2.50	5.49	7.32	3.19	4 770
	M7B	60.48	39.52	3.79	5.95	2.38	5.35	7.15	2.98	4 676
	F7B	61.98	38.02	3.89	6.11	2.52	5.35	7.16	3.12	4 064
	LL7B	60.79	39.21	3.78	5.98	2.35	5.34	7.19	2.90	5 790
	LL13B	60.51	39.49	3.79	5.96	2.38	5.33	7.14	2.93	5 280
	LL30B	60.35	39.65	3.81	5.95	2.40	5.33	7.09	2.99	4 949
	LL65B	60.35	39.65	3.79	5.95	2.37	5.31	7.10	2.93	5 430
+41	Human	60.48	39.52	4.01	6.28	2.53	6.20	8.32	3.58	2 967
	M7B	60.09	39.91	3.95	6.23	2.44	6.24	8.45	3.39	1 415
	F7B	61.77	38.23	4.04	6.43	2.56	6.18	8.46	3.44	1 318
	LL7B	59.83	40.17	3.97	6.25	2.44	6.24	8.41	3.43	2 035
	LL13B	60.47	39.53	3.99	6.29	2.48	6.23	8.41	3.50	1 693
	LL30B	60.21	39.79	3.98	6.24	2.49	6.21	8.34	3.53	1 579
	LL65B	60.08	39.92	3.95	6.22	2.45	6.16	8.33	3.37	1 880
