# Supplementary material
Source: ML conference proceedings conference paper supplement (https://openreview.net/forum?id=xg0fmtqh8d)
Supplement: supplementary_material [file 588_Breaking the Ceiling of the LLM Community by Treating Token Generation as a Classification for Ensembling.xlsx]

## Sheet: Sheet
Id	Models	MMLU	GSM8K	BBH	TriviaQA	NQ	Avg.	Date	Latency
1	Yi-34B-Chat	72.75	68.76	50.88	70.01	29.81	58.44	2023/11/08	67.96ms/token
2	Mixtral-8x7B-Instruct-v0.1	70.89	66.82	49.84	76.54	34.35	59.69	2023/12/11	96.64ms/token
3	Qwen1.5-72B-Chat	77.79	83.33	48.94	65.69	27.02	60.55	2024/02/04	102.11ms/token
4	Llama-3-70B-Instruct	79.68	90.00	57.13	79.12	35.57	68.30	2024/04/18	150.32ms/token
5	Qwen2-72B-Instruct	82.30	89.70	62.57	73.58	33.11	68.25	2024/06/07	113.91ms/token
Ensemble the Above Models with GAC
6	Yi + Mixtral	74.83	71.21	52.64	75.60	33.52	61.56↑3.13%	~2023/12/11	98.13ms/token
7	Qwen1.5-72B + Yi	79.83	77.27	52.05	70.88	33.80	62.77↑3.65%	~2024/02/04	103.69ms/token
8	Qwen1.5-72B + Mixtral	79.55	75.76	54.19	75.71	31.09	63.26↑4.47%	~2024/02/04	112.83ms/token
9	Llama-3 + Qwen1.5-72B	81.49	87.06	56.73	78.60	36.01	67.98↓0.47%	~2024/04/18	153.96ms/token
10	Qwen2-72B + Llama-3	83.54	90.91	63.99	79.29	37.65	71.08↑4.06%	~2024/06/07	151.56ms/token
Task-specific Top-2 Model Ensemble with GAC
11	Top-2 (~2024/04/18)	81.49	87.96	58.64	80.84	37.95	69.38↑1.58%	~2024/04/18	-
12	Top-2 (~2024/06/07)	83.54	90.91	63.99	80.84	37.95	71.45↑4.61%	~2024/06/07	-
