# Supplementary material
Source: ML conference proceedings conference paper supplement (https://openreview.net/forum?id=xg0fmtqh8d)
Supplement: supplementary_material [file 589_Balancing Performance and Efficiency_ A Multimodal Large Language Model Pruning Method based Image Text Interaction.xlsx]

## Sheet: Sheet
Method	ScienceQA	POPE	MMBench	VQAv2	TextVQA	MME
BLIP-2	61.00	85.30	-	41.00	42.50	1293.80
InstrucBILP	60.50	-	36.00	-	50.10	-
InstrucBILP	63.10	78.90	-	-	50.70	1212.80
Shikra	-	-	58.80	77.40	-	-
IDEFICS-9B	-	-	48.20	50.90	25.90	-
IDEFICS-80B	-	-	54.50	60.00	30.90	-
Qwen-VL	67.10	-	38.20	78.80	63.80	-
LLaVA-1.5	68.40	86.40	66.10	79.10	58.20	1476.90
Training-Free Method
LLaVA-PruMerge	68.52	70.70	56.78	65.90	53.51	1191.50
Ours	69.75	86.50	61.30	75.50	55.26	1430.50
Fine-tuning Method
LLaVA-PruMerge	68.50	76.30	60.90	72.00	56.00	1350.30
LLaVA-PruMerge+	68.30	84.00	64.90	76.80	57.10	1462.40
CrossGET	66.70	83.90	64.70	77.30	54.90	1510.20
Ours	70.15	85.50	66.00	76.80	56.61	1488.50
