# Supplementary material
Source: ML conference proceedings conference paper supplement (https://openreview.net/forum?id=xg0fmtqh8d)
Supplement: supplementary_material [file 590_GraphInsight_ Unlocking Insights in Large Language Models for Graph Structure Understanding.xlsx]

## Sheet: Sheet
Model/Algorithm	Hyperparameter	Value
GraphInsight	GraphRAG Base Rate γ%	0.8
	α% (Head Memory Region)	4.5%
	β% (Tail Memory Region)	10.5%
PageRank	Damping Factor λ	0.85
	Max Iterations	100
LLMs	Positional Bias Ψ(p)	U-shaped
