# Supplementary material
Source: ML conference proceedings conference paper supplement (https://openreview.net/forum?id=xg0fmtqh8d)
Supplement: supplementary_material [file 591_A Few Hypocrites_ Few-Shot Learning and Subtype Definitions for Detecting Hypocrisy Accusations in Online Climate Change Debates.xlsx]

## Sheet: Sheet
	precision	recall	f1-score	support
No accusation	0.97	0.74	0.84	221
Personal Moral Hypocrisy	0.50	0.86	0.63	35
Political Hypocrisy	0.41	0.74	0.53	35
Neither	1.00	0.50	0.67	2
accuracy			0.75	293
macro avg	0.72	0.71	0.67	293
weighted avg	0.85	0.75	0.77	293
