# Supplementary material
Source: ML conference proceedings conference paper supplement (https://openreview.net/forum?id=xg0fmtqh8d)
Supplement: supplementary_material [file 592_GroUSE_ A Benchmark to Evaluate Evaluators in Grounded Question Answering.xlsx]

## Sheet: Sheet
	Agreement rate of metrics						Total test pass rate
	Answer relevancy	Completeness	Usefulness	Faithfulness	Positive acceptance	Negative rejection
Finetuned Llama 3 8b (Unbalanced dataset)	88.89	81.94	81.25	52.78	91.67	91.67	81.37
Finetuned Llama 3 8b (Balanced dataset)	87.50	83.33	81.94	61.81	90.97	92.36	82.99
