# Supplementary material
Source: ML conference proceedings conference paper supplement (https://openreview.net/forum?id=xg0fmtqh8d)
Supplement: supplementary_material [file 593_A Scalable Data-Driven Framework for Systematic Analysis of SEC 10-K Filings Using Large Language Models.xlsx]

## Sheet: Sheet
Section	Element Type	Text
BUSINESS	NarrativeText	Payable Metal: Ounces or pounds of metal in concentrate payable to the operator after deducting a percentage of metal in concen- trate paid to a third-party smelter pursuant to smelting contracts.
BUSINESS	NarrativeText	Reserve: That part of a mineral deposit that could be economi- cally and legally extracted or produced at the time of the reserve determination.
BUSINESS	NarrativeText	Royalty: The right to receive a percentage or other denomination of mineral production from a resource extraction operation.
