# Supplementary material
Source: ML conference proceedings conference paper supplement (https://openreview.net/forum?id=xg0fmtqh8d)
Supplement: supplementary_material [file 594_Design and Evaluation of a CDSS for Drug Allergy Management Using LLMs and Pharmaceutical Data Integration.xlsx]

## Sheet: Sheet
Dataset	Content	Rows
Drugs	The full dataset of Italian-authorized drugs.	243,216
Leaflets	The leaflets of the Italian-authorized drugs.	19,188
Patients Dataset	The synthetic dataset for patients and prescriptions.	4,970
Processed Leaflet info	The preprocessed leaflet info for the prescriptions in the patient dataset.	995
Ingredients Synonyms	Synonyms for the active and inactive ingredients related to the processed drugs dataset.	2,190
