# Supplementary material
Source: ML conference proceedings conference paper supplement (https://openreview.net/forum?id=xg0fmtqh8d)
Supplement: supplementary_material [file 595_Dated Data_ Tracing Knowledge Cutoffs in Large Language Models.xlsx]

## Sheet: Sheet
Model Name	Pile	C4	RW	CC Dumps	Wiki Dump	CC Cutoff
Pythia (Biderman et al., 2023)	√					? ’20
GPT-Neo (Black et al., 2022)	√					? ’20
GPT-J (Wang & Komatsuzaki, 2021)	√					? ’20
RedPajamas (Computer, 2023)		√		5 (’19-’23)	Mar ’23	Jan ’23
Falcon (Almazrouei et al., 2023)	√		√			Feb ’23
FalconRW (Almazrouei et al., 2023)			√			Feb ’23
OLMo (Groeneveld et al., 2024)		√		20 (’20-’23)	Mar ’23	June ’23
LLaMA (Touvron et al., 2023a)		√		5 (’17-’20)	Aug ’22	? ’20
