# Supplementary material
Source: ML conference proceedings conference paper supplement (https://openreview.net/forum?id=xg0fmtqh8d)
Supplement: supplementary_material [file 596_Content Moderation by LLM_ From Accuracy to Legitimacy.xlsx]

## Sheet: Sheet
	Easy Cases			Hard Cases
	Accuracy	Speed	Transparency	Justification	Participation
Traditional AI
LLM
Ordinary Human Moderator
Expert Moderator
