# Supplementary material
Source: ML conference proceedings conference paper supplement (https://openreview.net/forum?id=xg0fmtqh8d)
Supplement: supplementary_material [file 597_Assessing SPARQL capabilities of Large Language Models.xlsx]

## Sheet: Sheet
company	short name	long name	context size
Anthropic	Claude 2.1	Claude-2.1	200k
	Claude 3 Haiku	claude-3-haiku-20240307	200k
	Claude 3 Sonnet	claude-3-sonnet-20240229	200k
	Claude 3 Opus	claude-3-opus-20240229	200k
Google	Gemini 1.0	gemini-1.0-pro
	Gemini 1.5	gemini-1.5-pro-latest
OpenAI	GPT 3.5t 2024/01	gpt-3.5-turbo-0125	16k
	GPT 4t 2023/11	gpt-4-1106-preview	128k
	GPT 4t 2024/04	gpt-4-turbo-2024-04-09	128k
