# Supplementary material
Source: ML conference proceedings conference paper supplement (https://openreview.net/forum?id=xg0fmtqh8d)
Supplement: supplementary_material [file 598_Zero-Shot Topic Classification of Column Headers_ Leveraging LLMs for Metadata Enrichment.xlsx]

## Sheet: Sheet
	No Context		With Context
	Exact Match	Close Match	Exact Match	Close Match
ChatGPT	0.29	0.5	0.33	0.53
GoogleGemini	0.28	0.46	0.15	0.37
GoogleBard	0.24	0.31	X	X
