# Supplementary material
Source: ML conference proceedings conference paper supplement (https://openreview.net/forum?id=xg0fmtqh8d)
Supplement: supplementary_material [file 599_LogicPro_ Improving Complex Logical Reasoning via Program-Guided Learning.xlsx]

## Sheet: Sheet
Logic Data	BBH27	GSM8K	HellaSwag	Logiqa	Reclor	RTE	Average
-	44.8	65.2	71.0	54.0	63.5	84.0	48.3
Realistic Logicalmix3	47.9	65.4	75.0	54.0	60.5	84.5	51.0
AR-LSAT (Zhong et al. 2021)	44.9	64.2	73.0	55.0	62.5	84.0	48.5
Logiqa (Liu et al. 2023a)	44.6	64.2	74.5	58.0	63.0	84.0	48.4
Reclor (Yu et al. 2020)	47.3	64.7	72.0	53.0	63.5	84.0	50.5
Synthetic Logicalmix3	47.3	64.4	76.5	53.0	61.0	83.5	50.5
Entailmentbank (Dalvi et al. 2021)	44.0	65.4	74.5	54.0	60.5	84.5	47.7
ProntoQA (Saparov and He 2023)	46.9	64.7	73.0	53.5	63.0	84.0	50.2
RuleTaker (Clark et al. 2021)	46.4	67.1	74.5	54.5	63.5	84.5	49.9
Mathematical Logicalmix3	46.7	65.7	74.5	56.0	63.5	84.5	50.1
ASDiv (Miao, Liang, and Su 2020)	45.7	66.7	73.5	57.0	63.0	83.5	49.3
GSM8K (Cobbe et al. 2021)	46.3	65.3	72.0	55.0	62.0	85.0	49.7
SVAMP (Patel et al. 2021)	47.1	66.2	74.0	54.0	61.5	84.5	50.4
R-S-M-Mix-Logic	47.6	65.0	69.5	57.0	62.5	86.0	50.7
LogicPro	47.9	66.2	71.0	55.5	64.0	84.0	51.1
