# Supplementary material
Source: ML conference proceedings conference paper supplement (https://openreview.net/forum?id=xg0fmtqh8d)
Supplement: supplementary_material [file 600_LLM-Measure_ Generating Valid, Consistent, and Reproducible Text-Based Measures for Social Science Research.xlsx]

## Sheet: Sheet
	OLS model
	R&D expenses divided by total assets
Intercept	0.378***	0.365***	0.378***
	(34.966)	(33.979)	(35.263)
Innovation (Dictionary)	0.010***
	(3.193)
Innovation (LLM-prompting)		0.035***
		(11.408)
Innovation (LLM-Measure)			0.031***
			(10.152)
Size	-0.0395***	-0.038***	-0.039***
	(-27.226)	(-26.124)	(-27.453)
R²	0.125	0.145	0.140
N	5,237	5,237	5,237
