# Supplementary material
Source: ML conference proceedings conference paper supplement (https://openreview.net/forum?id=xg0fmtqh8d)
Supplement: supplementary_material [file 601_Concept Induction using LLMs_ a user experiment for assessment.xlsx]

## Sheet: Sheet
Image Set	H.Ability	LLM.Ability	HvE Wins	HvL Wins	LvE Wins
Set 1: Bedroom v Park	1.47	-1.05	72-12	74-10	18-66
Set 2: Living Room v Parking Lot	2.64	2.76	84-3	38-49	79-8
Set 3: Office v Playground	1.12	0.34	74-15	54-35	45-44
Set 4: Airport v Amusement Park	1.93	0.77	77-13	70-20	63-27
Set 5: Bathroom v Art Studio	1.05	1.47	67-20	32-55	68-19
Set 6: Beauty Salon v Forest Path	0.72	-0.86	63-25	69-19	22-66
Set 7: Bookstore v Child Room	1.72	1.79	76-15	45-46	79-12
Set 8: Hotel Room v Cockpit	0.65	-1.68	62-28	79-11	11-79
Set 9: Shoe Store v Alcove	0.79	1.52	63-24	25-62	68-19
Set 10: Alley v Wet Bar	2.74	1.85	85-6	65-26	79-12
Set 11: Closet v Construction Site	1.98	1.14	77-8	57-28	62-23
Set 12: Gazebo v Bowling Alley	2.64	-1.03	85-2	81-6	19-68
Set 13: Garage v Hallway	0.42	-0.09	49-39	59-29	46-42
Set 14: Laundromat v Pantry	1.86	1.18	75-14	61-28	70-19
Set 15: Conference Room v Waterfall	2.42	-0.45	85-3	79-9	30-58
Set 16: Home Office v Bow	1.83	1.58	77-13	51-39	75-15
Set 17: Dining Room v Kitchen	0.24	0.33	45-41	44-42	53-33
Set 18: Fast Food v Office Building	2.58	0.24	84-4	78-10	47-41
Set 19: Jacuzzi v Greenhouse	3.08	2.13	88-5	68-25	84-9
Set 20: Gymnasium v Corridor	2.76	1.63	83-6	68-21	75-14
Set 21: Bus v Broadleaf Forest	2.24	-0.59	77-8	80-5	30-55
Set 22: Casino v Arrival Gate	1.77	1.11	73-13	57-29	65-21
Set 23: Library v Gas Station	0.92	-1.02	61-31	85-7	29-63
Set 24: Valley v Yard	2.66	1.17	85-7	76-16	71-21
Set 25: Mountain v Coast	0.45	-0.64	50-36	67-19	32-54
Set 26: Dinette Vehicle v Farm Field	0.88	-0.62	69-23	71-21	28-64
Set 27: Poolroom v Driveway	-0.72	-0.12	30-58	30-58	40-48
Set 28: Bridge v Auditorium	1.95	1.9	80-10	45-45	77-13
Set 29: Museum v Youth Hostel	1.24	-1.04	68-20	80-8	23-65
Set 30: Supermarket v Restaurant	2.12	2.97	75-8	24-59	78-5
Set 31: Classroom v Archive	1.18	0.06	65-18	61-22	41-42
Set 32: Dentist Office v Ballroom	2.94	1.29	85-5	76-14	71-19
Set 33: Lighthouse v River	1.68	1.81	73-14	41-46	75-12
Set 34: Creek v Basement	4.46	2.85	86-4	78-12	88-2
Set 35: Building Facade v Ocean	1.69	0.77	77-16	68-25	65-28
Set 36: Courthouse v Parking Garage	2.95	1.15	82-7	79-10	70-19
Set 37: Balcony v Skyscraper	3.18	0.8	84-4	81-7	61-27
Set 38: Game Room v Waiting Room	0.68	0.09	63-29	57-35	46-46
Set 39: Landing Deck v Window Seat	2.72	2.15	86-4	56-34	79-11
Set 40: Bar v Warehouse	1.35	0.47	73-15	59-29	51-37
Set 41: Bakery v Apartment Building	0.99	1.98	63-21	21-63	72-12
Set 42: Needleleaf Forest v Playroom	2.41	1.14	81-8	70-19	68-21
Set 43: Outdoor Window v Roundabout	2.14	0.53	84-8	75-17	56-36
Set 44: Reception v Golf Course	2.16	0.99	76-9	65-20	62-23
Set 45: Staircase v Plaza	1.09	0.04	65-21	63-23	43-43
