# Supplementary material
Source: ML conference proceedings conference paper supplement (https://openreview.net/forum?id=xg0fmtqh8d)
Supplement: supplementary_material [file 602_PEDRO_ Parameter-Efficient Fine-tuning with Prompt DEpenDent Representation MOdification.xlsx]

## Sheet: Sheet
Method	Tunable Params	SST-2 (acc)	RTE (acc)	QNLI (acc)	BoolQ (acc)	COPA (acc)	ReCoRD (f1-em)	SQuAD (f1-em)
Full-FT	7B	94.2	84.5	93.3	88.7	91.9	92.4	89.5
Baseline PEFT methods
P-tuning v2	9.4M	92.8	80.6	92.1	85.2	90.1	89.4	86.9
LPT	8.4M	92.8	81.3	92.3	85.7	90.2	89.9	87.4
Housbly-Adapter	9.4M	92.9	80.6	92.4	84.5	90.4	89.8	87.3
Learned-Adapter	9.5M	93.6	81.5	92.4	86.2	90.4	90.1	87.6
LoRA	10.0M	93.6	82.6	92.5	86.7	90.7	90.2	87.7
AdaLoRA	10.0M	93.8	83.1	92.8	87.0	91.2	90.6	87.7
SSP	8.6M	93.5	82.6	92.6	86.4	91.1	90.0	87.4
BitFit	10.9M	92.9	81.9	92.2	85.6	90.5	89.8	87.2
(IA)^3	9.8M	93.0	82.7	92.5	86.4	90.7	90.1	87.6
Our proposed methods
PEDRO	8.9M	94.7	84.2	93.7	88.1	92.5	91.7	89.1
