# Supplementary material
Source: ML conference proceedings conference paper supplement (https://openreview.net/forum?id=xg0fmtqh8d)
Supplement: supplementary_material [file 603_Selective Self-Rehearsal_ A Fine-Tuning Approach to Improve Generalization in Large Language Models.xlsx]

## Sheet: Sheet
Method	MMLU	T.QA	gsm8k	HS	Avg
Prompt	58.7	59.6	44.7	66.1	57.3
SFT (MD2D)	-5.2	-25.3	-31.0	-5.2	-16.7
SSR (MD2D)	0.2	-2.5	-5.8	-1.2	-2.3
SFT (NQ)	-5.2	-19.8	-23.9	-1.8	-12.7
SSR (NQ)	-0.4	-1.1	-6.4	0.0	-2.0
