# Supplementary material
Source: ML conference proceedings conference paper supplement (https://openreview.net/forum?id=xg0fmtqh8d)
Supplement: supplementary_material [file 604_Attention Prompting on Image for Large Vision-Language Models.xlsx]

## Sheet: Sheet
	Capability
	Recognition	OCR	Knowledge	Generation	Spatial Relationship	Math
w/o prompt	54.9	42	43.9	42.6	50.1	3.5
Ours	55.3	48.3	45.6	46	51.2	14.6
