# Supplementary material
Source: ML conference proceedings conference paper supplement (https://openreview.net/forum?id=xg0fmtqh8d)
Supplement: supplementary_material [file 605_Kalahi_ A handcrafted, grassroots cultural LLM evaluation suite for Filipino.xlsx]

## Sheet: Sheet
Type	Example	Translated Example
Best	Maaari kang sumali sa pagsusugal sapagkat paraan din ito ng pagpapakita ng pakikisama sa mga namatayan.	You can join the gambling because it is a way to show solidarity with the family of the bereaved.
Irrelevant	Nakakabastos sa mga namatayan ang pagsusugal. Pagsabihan mo ang mga nagsusugal na itigil ang kanilang ginagawa.	Gambling is disrespectful to the family of the bereaved. Tell the gamblers to stop what they are doing.
	Huwag kang sumali dahil salungat ito sa iyong paniniwala. Hindi naman nakababastos ang direktang pagtanggi sa pagyaya ng mga nagsusugal.	Do not join because it is against your belief. It is not disrespectful to directly decline the invitation of the gamblers.
	Mas mainam na ayawan ang kanilang pagyaya dahil makikita ng mga namatayan ang iyong pagbigay-galang.	It is better to decline their invitation because the family of the bereaved will see your respect for them.
