# Supplementary material
Source: ML conference proceedings conference paper supplement (https://openreview.net/forum?id=xg0fmtqh8d)
Supplement: supplementary_material [file 606_CollectiveSFT_ Scaling Large Language Models for Chinese Medical Benchmark with Collective Instructions in Healthcare.xlsx]

## Sheet: Sheet
Model	Total Avg.	Training Grad.	Nursing Exam	Pharm. Exam	Med. Tech. Exam	Prof. Knowledge	Med. Postgrad.
CollectiveSFT-7B	77.05	83.00	85.75	79.25	72.50	90.25	80.25
InternLM2.5-7B [6]	71.40	75.80	78.13	68.28	70.92	65.00	72.19
HuatuoGPTII-34B [7]	76.80	82.50	75.50	73.25	68.75	87.75	77.00
Qwen-72B-Chat [3]	74.38	88.00	75.00	77.00	70.25	94.25	65.50
Yi-34B-Chat [2]	69.17	78.75	69.50	69.75	63.75	87.00	56.50
AntGLM-Med-10 [18]	64.09	81.75	62.00	63.75	60.25	82.50	64.50
GPT-4 [20]	59.46	64.50	60.75	39.50	57.00	77.50	61.25
HuatuoGPTII-7B [7]	59.00	70.75	64.75	60.00	57.75	70.25	53.75
[7] Qwen-14B-Chat [3]	57.64	69.00	60.50	51.25	51.75	73.00	50.00
Baichuan2-13B-Chat [4]	48.87	56.50	47.75	44.50	45.50	63.25	39.25
Qwen-7B-Chat [3]	46.58	56.25	46.00	42.00	37.25	63.50	39.50
ChatGLM2-6B [10]	45.05	48.25	47.25	43.75	43.00	54.25	42.25
