# Supplementary material
Source: ML conference proceedings conference paper supplement (https://openreview.net/forum?id=xg0fmtqh8d)
Supplement: supplementary_material [file 607_Generating Media Background Checks for Automated Source Critical Reasoning.xlsx]

## Sheet: Sheet
	with MBC	without MBC	Equally Good	χ^2	p-value
Preferred Answer	165	26	29	57.02*	0.000
Better Understanding Provided	69	56	95	60.22*	0.001
