# Supplementary material
Source: ML conference proceedings conference paper supplement (https://openreview.net/forum?id=xg0fmtqh8d)
Supplement: supplementary_material [file 608_ARN_ Analogical Reasoning on Narratives.xlsx]

## Sheet: Sheet
Task Partition	(near, far)	(near, near)	(far, far)	(far, near)	Avg.
SBERT	84.3	71.5	12.6	1.00	42.3
GPT3.5	88.1	81.3	50.4	21.7	60.3
GPT4.0	94.0	92.5	57.1	29.1	68.1
UnifiedQA-L	43.2	49.1	47.2	50.5	47.5
UnifiedQA-3B	66.4	68.4	47.3	44.4	56.6
UnifiedQA-11B	60.7	61.2	54.8	74.6	62.8
Llama-2-7B	63.4	58.0	50.1	43.1	53.7
Llama-2-13B	80.9	81.4	44.5	35.4	60.5
FlanT5-L	84.5	80.3	41.4	14.4	55.1
FlanT5-xl	78.9	68.3	44.7	21.1	53.2
FlanT5-xxl	89.9	81.3	51.1	35.6	64.4
Macaw-11B	88.0	84.6	42.1	35.8	62.6
Avg.	76.9	73.2	45.3	33.9	57.3
human	98.6	97.2	96.8	91.4	96.0
