# Supplementary material
Source: ML conference proceedings conference paper supplement (https://openreview.net/forum?id=xg0fmtqh8d)
Supplement: supplementary_material [file 609_vTrain_ A Simulation Framework for Evaluating Cost-effective and Compute-optimal Large Language Model Training.xlsx]

## Sheet: Sheet
h	L	Parameters (billion)	Tokens (billion)	Optimal (t,d,p)	Estimated training time (days)
12,288	80	145.61	2,912	(8,42,10)	85
12,288	70	127.49	2,550	(8,60,7)	64
12,288	60	109.37	2,187	(8,70,6)	47
10,240	70	88.62	1,772	(8,84,5)	40
10,240	60	76.04	1,521	(8,70,6)	30
9,216	80	82.03	1,641	(8,84,5)	37
9,216	70	71.83	1,437	(8,84,5)	29
