# Supplementary material
Source: ML conference proceedings conference paper supplement (https://openreview.net/forum?id=xg0fmtqh8d)
Supplement: supplementary_material [file 610_Can OpenSource beat ChatGPT_ -- A Comparative Study of Large Language Models for Text-to-Code Generation.xlsx]

## Sheet: Sheet
LLM	Level	Math	Matrix	Counting	Total	Total in percent
Bard	easy	3	5	6	14	46.67%
Bard	medium	1	1	0	2	6.67%
Bard	hard	0	0	0	0	0.00%
BingChat	easy	5	5	6	16	53.33%
BingChat	medium	4	5	3	12	40.00%
BingChat	hard	1	5	1	7	24.14%
ChatGPT	easy	7	6	7	20	66.67%
ChatGPT	medium	6	7	6	19	63.33%
ChatGPT	hard	6	5	2	13	44.83%
Code Llama	easy	2	2	3	7	23.33%
Code Llama	medium	1	0	0	1	3.33%
Code Llama	hard	0	0	0	0	0.00%
Llama2	easy	1	2	3	6	20.00%
Llama2	medium	0	0	0	0	0.00%
Llama2	hard	0	0	0	0	0.00%
