# Supplementary material
Source: ML conference proceedings conference paper supplement (https://openreview.net/forum?id=xg0fmtqh8d)
Supplement: supplementary_material [file 611_Large Language Model Empowered Embedding Generator for Sequential Recommendation.xlsx]

## Sheet: Sheet
Backbone Model		Yelp				Fashion				Beauty
		Overall		Tail		Overall		Tail		Overall		Tail
		H@10	N@10	H@10	N@10	H@10	N@10	H@10	N@10	H@10	N@10	H@10	N@10
GRU4Rec	- None	0.4879	0.2751	0.0171	0.0059	0.4798	0.3809	0.0257	0.0101	0.3683	0.2276	0.0796	0.0567
	- MELT	0.4985	0.2825	0.0201	0.0079	0.4884	0.3975	0.0291	0.0112	0.3702	0.2161	0.0009	0.0003
	- LLM2X	0.4872	0.2749	0.0201	0.0072	0.4881	0.4100	0.0264	0.0109	0.4151	0.2713	0.0896	0.0637
	- SAID	0.4891	0.2764	0.0180	0.0062	0.4920	0.4168	0.0347	0.0151	0.4193	0.2621	0.0936	0.0661
	- TSLRec	0.4528	0.2509	0.0255	0.0095	0.4814	0.4042	0.0149	0.0071	0.3119	0.1865	0.0750	0.0474
	- LLMEmb	0.5270*	0.2980*	0.1116*	0.0471*	0.5062*	0.4329*	0.1046*	0.0477*	0.4445*	0.2726	0.3183*	0.1793*
Bert4Rec	- None	0.5307	0.3035	0.0115	0.0044	0.4668	0.3613	0.0142	0.0067	0.3984	0.2367	0.0101	0.0038
	- MELT	0.6206	0.3770	0.0429	0.0149	0.4897	0.3810	0.0059	0.0019	0.4716	0.2965	0.0709	0.0291
	- LLM2X	0.6199	0.3781	0.0874	0.0330	0.5109	0.4159	0.0377	0.0169	0.5029	0.3209	0.0927	0.0451
	- SAID	0.6156	0.3732	0.0973	0.0382	0.5135	0.4124	0.0694	0.0433	0.5127	0.3360	0.1124	0.0664
	- TSLRec	0.6069	0.3680	0.0969	0.0388	0.5078	0.4143	0.0418	0.0182	0.4936	0.3178	0.1013	0.0589
	- LLMEmb	0.6294*	0.3881*	0.1876*	0.1094*	0.5244*	0.4238*	0.1485*	0.0764*	0.5247*	0.3485*	0.2430*	0.1224*
SASRec	- None	0.5940	0.3597	0.1142	0.0495	0.4956	0.4429	0.0454	0.0235	0.4388	0.3030	0.0870	0.0649
	- MELT	0.6257	0.3791	0.1015	0.0371	0.4875	0.4150	0.0368	0.0144	0.4334	0.2775	0.0460	0.0172
	- LLM2X	0.6415	0.3997	0.1760	0.0789	0.5210	0.4486	0.0768	0.0473	0.5043	0.3319	0.1608	0.0940
	- SAID	0.6277	0.3841	0.1548	0.0669	0.5316	0.4619	0.0901	0.0540	0.5097	0.3343	0.1549	0.0906
	- TSLRec	0.6152	0.3795	0.1383	0.0620	0.5125	0.4594	0.0652	0.0382	0.4977	0.3366	0.1211	0.0789
	- LLMEmb	0.6647*	0.4113*	0.2951*	0.1456*	0.5521*	0.4730*	0.1513*	0.0826*	0.5277*	0.3460*	0.4194*	0.2595*
