# Supplementary material
Source: ML conference proceedings conference paper supplement (https://openreview.net/forum?id=xg0fmtqh8d)
Supplement: supplementary_material [file 612_Dynamic-Width Speculative Beam Decoding for Efficient LLM Inference.xlsx]

## Sheet: Sheet
	Method	EM/EA	PPL	tokens/s	J/token
Llama-2 SQuAD	Multinomial	74	1.82	21.14	12.36
	SpecDecode	75	1.79	27.11	8.34
	SpecInfer	74	1.78	27.15	9.22
	DSBD	86	1.54	26.67	8.75
OPT SQuAD	Multinomial	66	1.98	23.47	11.14
	SpecDecode	66	1.94	39.68	5.25
	SpecInfer	66	1.95	38.73	6.30
	DSBD	73	1.59	36.76	5.54
Llama-2 Spider	Multinomial	20	1.37	21.98	11.14
	SpecDecode	19	1.38	31.74	7.06
	SpecInfer	19	1.36	32.00	8.01
	DSBD	31	1.26	30.30	7.17
OPT Spider	Multinomial	0	1.90	23.81	11.58
	SpecDecode	0	1.85	37.17	5.92
	SpecInfer	0	1.91	37.73	6.34
	DSBD	1	1.64	34.48	6.23
