# Supplementary material
Source: ML conference proceedings conference paper supplement (https://openreview.net/forum?id=xg0fmtqh8d)
Supplement: supplementary_material [file 613_SPA_ Towards A Computational Friendly Cloud-Base and On-Devices Collaboration Seq2seq Personalized Generation with Casual Inference.xlsx]

## Sheet: Sheet
Model	Ratios	XSum	CNN-DM	CoQA	SciQ
LLaMA-7B + Fully Integration	1.0	36.24	40.55	38.81	25.91
LLaMA-7B + Fully Separation	0.68	30.29	34.19	32.11	23.71
LLaMA-7B + LST	1.0	28.18	32.15	31.24	23.24
LLaMA-7B + SPA	0.64	36.52	39.22	37.30	25.38
