# Supplementary material
Source: ML conference proceedings conference paper supplement (https://openreview.net/forum?id=xg0fmtqh8d)
Supplement: supplementary_material [file 614_How Do Your Code LLMs Perform_ Empowering Code Instruction Tuning with High-Quality Data.xlsx]

## Sheet: Sheet
Dataset	Size	TLI	HumanEval		LiveCodeBench
			Base-Pass@1	Plus-Pass@1	Pass@1	Easy-Pass@1
Codefuse-Evol-Instruct	66862	8.9	61.0	53.7	13.5	34.5
+Clean	66404 (-0.7%)	4.8 (-4.1)	59.1 (-1.9)	53.7 (0)	12.3 (-1.3)	33.1 (-1.4)
Magicoder-Evol-Instruct	111183	43.2	68.3	64.0	15.3	38.7
+Clean	108063 (-2.8%)	4.9 (-38.3)	65.9 (-2.4)	59.8 (-4.2)	13.0 (-2.3)	34.5 (-4.2)
Code-Feedback	66383	30.5	64.0	57.3	13.8	35.2
+Clean	64134 (-3.4%)	4.6 (-25.9)	56.7 (-7.3)	51.8 (-5.5)	14.8 (+1.0)	38.0 (+2.8)
