# Supplementary material
Source: ML conference proceedings conference paper supplement (https://openreview.net/forum?id=xg0fmtqh8d)
Supplement: supplementary_material [file 615_BodyShapeGPT_ SMPL Body Shape Manipulation with LLMs.xlsx]

## Sheet: Sheet
	LLLM	LLLM + Lshape	LLLM + Lshape + Lmeas.
height_average	99,7%	99,1%	99,9%
hip_thickness_average	95,4%	96,1%	99,1%
hip_thickness_average	94,8%	96,0%	98,8%
bmi_average	94,5%	95,8%	98,4%
waist_thickness_average	94,5%	94,9%	98,0%
. . .
neck_length_very_high	33,3%	50,0%	82,6%
arms_relation_very_high	30,4%	41,6%	81,0%
leg_thickness_very_low	24,0%	41,6%	79,3%
shoulders_relation_very_low	21,7%	41,1%	78,1%
bmi_very_low	18,7%	40,9%	76,7%
