# Supplementary material
Source: ML conference proceedings conference paper supplement (https://openreview.net/forum?id=xg0fmtqh8d)
Supplement: supplementary_material [file 616_Anchored Preference Optimization and Contrastive Revisions_ Addressing Underspecification in Alignment.xlsx]

## Sheet: Sheet
MixEval-Hard split	# query	Llama-3-8B -Instruct	+ CLAIR	+ Judge (on-policy)	+ Judge (off-policy)	+ Stronger Preferred
Overall score	988	41.45	49.10	46.10	44.15	43.90
TriviaQA	267	34.30	49.20	42.40	43.70	39.80
MMLU	231	43.70	39.00	42.00	36.80	34.60
DROP	167	50.20	58.70	64.30	64.90	58.90
AGIEval	71	31.00	38.00	38.00	39.40	38.00
HellaSwag	61	29.50	37.70	26.20	29.50	27.90
CommonsenseQA	50	60.00	72.00	60.00	48.00	58.00
BoolQ	37	40.50	45.90	32.40	21.60	27.00
GSM8k	22	60.00	80.00	69.50	63.20	84.10
SIQA	20	45.00	50.00	40.00	15.00	40.00
MATH	16	47.50	63.70	51.30	58.80	73.10
BBH	16	51.30	68.80	57.50	60.60	66.90
OpenBookQA	8	62.50	62.50	50.00	62.50	75.00
GPQA	8	12.50	25.00	25.00	25.00	37.50
PIQA	8	50.00	62.50	62.50	62.50	75.00
ARC	4	0.00	0.00	0.00	0.00	0.00
MBPP	2	0.00	0.00	0.00	0.00	0.00
Objective used:		/	APO-zero	APO-zero	APO-down	SFT
