# Supplementary material
Source: ML conference proceedings conference paper supplement (https://openreview.net/forum?id=xg0fmtqh8d)
Supplement: supplementary_material [file 617_Exploring Language Model Generalization in Low-Resource Extractive QA.xlsx]

## Sheet: Sheet
Domain	Model	Avg. Val. #chars			EM	F1
		True	Predicted	∆
SQuAD (Open/General)	BiDAF	18.73	25.31	6.58	65.73	75.98
	QANet		23.74	5.01	26.3	36.81
	BERT		18.18	-0.55	80.95	88.25
	RoBERTa		18.03	-0.7	82.73	90.04
COVID-QA (BioMedical)	BiDAF	93.42	986.73	893.31	17.43	38.3
	QANet		460.81	367.39	0.99	5.76
	BERT		28.81	-64.61	22.39	42.11
	RoBERTa		25.81	-67.61	21.89	40.2
CUAD (Law)	BiDAF	120.07	5261.19	5141.12	5.06	16.81
	QANet		277.32	157.25	0.8	7.01
	BERT		33.55	-86.52	7.72	15
	RoBERTa		19.55	-100.52	4.02	7.7
DuoRC (Movie Plots)	BiDAF	14.27	66.23	51.96	43.99	56.53
	QANet		155.32	141.05	19.03	27.56
	BERT		14.72	0.45	55.59	69.25
	RoBERTa		14.03	-0.24	60.6	74.43
TechQA (Technical QA)	BiDAF	156.79	4302.93	4146.14	0.625	14.56
	QANet		387.2	230.41	0	7.65
	BERT		18.42	-138.37	0	9.19
	RoBERTa		26.89	-129.9	0.625	5.94
